# Supplementary material for: Transcriptomics and Network Pharmacology Reveal the Protective Effect of Chaiqin Chengqi Decoction on Obesity-Related Alcohol-Induced Acute Pancreatitis via Oxidative Stress and PI3K/Akt Signaling Pathway
Source: Front Pharmacol. 2022 Jun 8;13:896523. doi: 10.3389/fphar.2022.896523 (PMC9213732; doi:10.3389/fphar.2022.896523)
Supplement: Supplementary file 2 [file Table1.XLSX]

## Sheet: Table S1
Table S1. Concentration of 22 compounds (µg/g) in CQCQD.
Compounds	D8
Synephrine	142.7
Geniposidic acid	8
Salidroside	2.2
Coniferin	12.7
Syringin	32.1
Geniposide	3392.3
Rutin	71.3
Narirutin	101.2
Naringin	14.3
Hesperidin	1567.6
Sennoside A	193.7
Aloe emodin	4235.6
Wogonoside	1343.6
Physcion	3.3
Aloe emodin	49.2
Baicalein	290.6
Sinensetin	32.4
Chrysin	4.4
Rhein	146.2
Honokiol	13.1
Magnolol	26.6
Emodin	54

## Sheet: Table S2
Table S2 List of differentially expressed genes (DEGs) in pancreatic transcriptomics
SYMBOL	ENSEMBL	ENTREZID	CD1	CD2	AP1	AP2	AP3	baseMean	log2FoldChange	lfcSE	stat	pvalue	padj	label
Ctrb1	ENSMUSG00000031957	66473	2171217	2208537	1630572	1680993	2692875	2.00146e+06	-0.913427	0.213899	-4.27037	1.9515e-05	0.000156932	DOWN
Pnlip	ENSMUSG00000046008	69060	857725	901297	463683	491321	524704	821499	-1.61699	0.176354	-9.16901	4.77382e-20	4.15243e-18	DOWN
Cela2a	ENSMUSG00000058579	13706	906174	893088	563545	611318	586522	786044	-1.39365	0.15488	-8.99828	2.29288e-19	1.91977e-17	DOWN
Cpa1	ENSMUSG00000054446	109697	670230	637730	402540	420038	534857	634976	-1.30978	0.165647	-7.90703	2.63596e-15	1.25444e-13	DOWN
Cpb1	ENSMUSG00000011463	76703	554474	523953	396926	437994	373799	536646	-1.19509	0.149176	-8.01127	1.13528e-15	5.86638e-14	DOWN
Cel	ENSMUSG00000026818	12613	558718	548556	277982	320008	325439	533396	-1.624	0.162208	-10.0119	1.3518e-23	1.62809e-21	DOWN
2210010C04Rik	ENSMUSG00000029882	67373	671466	666790	305478	339085	241088	524438	-1.95681	0.177586	-11.0189	3.09698e-28	5.91335e-26	DOWN
Try4	ENSMUSG00000054106	22074	571516	593737	236321	226247	437103	416268	-1.74506	0.25014	-6.97633	3.02998e-12	9.19389e-11	DOWN
Try5	ENSMUSG00000036938	103964	460708	421094	265903	283630	417221	364130	-1.22898	0.187489	-6.55491	5.56745e-11	1.40596e-09	DOWN
Ctrl	ENSMUSG00000031896	109660	299692	315863	229496	240061	220799	309965	-1.20163	0.154089	-7.79829	6.27505e-15	2.8071e-13	DOWN
Clps	ENSMUSG00000024225	109791	325360	328005	142479	189358	125543	308906	-1.87264	0.22303	-8.39635	4.60591e-17	2.8731e-15	DOWN
Dmbt1	ENSMUSG00000047517	12945	88770	77265	399824	386858	528110	219270	1.62526	0.172957	9.39689	5.6199e-21	5.30065e-19	UP
Rnase1	ENSMUSG00000035896	19752	232635	242679	145263	167840	119964	238892	-1.4975	0.203508	-7.35844	1.86072e-13	6.90361e-12	DOWN
Amy2b	ENSMUSG00000083079	545562	225896	218433	216492	176189	154521	190215	-1.06654	0.148852	-7.1651	7.77289e-13	2.57839e-11	DOWN
Cpa2	ENSMUSG00000071553	232680	139217	134151	83022	92640	75424	118619	-1.48291	0.170758	-8.68426	3.81204e-18	2.80212e-16	DOWN
Reg2	ENSMUSG00000023140	19693	3464	2294	199906	208869	195177	84625.7	5.37082	0.191121	28.1017	9.33722e-174	3.65482e-170	UP
Reg3b	ENSMUSG00000071356	18489	627	498	186677	193509	216575	79404.1	7.69813	0.233851	32.9189	1.17824e-237	9.22382e-234	UP
Zg16	ENSMUSG00000049350	69036	127984	135335	65210	66432	42439	113037	-1.96304	0.219954	-8.92474	4.46766e-19	3.60568e-17	DOWN
Nupr1	ENSMUSG00000030717	56312	22929	20675	97956	101665	154812	54315	1.66144	0.458774	3.62149	0.000292913	0.00172671	UP
Pnliprp2	ENSMUSG00000025091	18947	68566	65832	46329	51468	53428	61633.9	-1.19138	0.158495	-7.51683	5.61193e-14	2.21884e-12	DOWN
Amy2a4	ENSMUSG00000096770	100043684	55331	61249	61993	40259	18810	53922.8	-1.32362	0.320409	-4.13103	3.61139e-05	0.000270543	DOWN
Amy2a5	ENSMUSG00000074268	109959	44575	43908	40118	23795	27431	38554	-1.3291	0.282633	-4.70258	2.56895e-06	2.55865e-05	DOWN
Prss3	ENSMUSG00000071519	22073	153078	145942	2604	3294	31329	48916.5	-4.37957	1.06357	-4.11781	3.82492e-05	0.000284363	DOWN
Mt1	ENSMUSG00000031765	17748	4070	6032	55587	38441	69305	18588.3	2.61963	0.689897	3.79713	0.000146381	0.000933559	UP
Cuzd1	ENSMUSG00000040205	16433	14098	13194	39339	35809	50000	20573.6	0.831981	0.179562	4.6334	3.59714e-06	3.46801e-05	UP
Reg3a	ENSMUSG00000079516	19694	83	84	36016	37993	53993	16928	8.21786	0.233747	35.1571	9.04226e-271	1.41575e-266	UP
Reg3d	ENSMUSG00000068341	30053	3373	2982	35105	36516	49977	16377.3	2.89835	0.177685	16.3117	8.14595e-60	7.50242e-57	UP
Reg3g	ENSMUSG00000030017	19695	70	105	32519	26107	44422	14538.7	7.81115	0.43366	18.0122	1.56381e-72	2.04038e-69	UP
Lrg1	ENSMUSG00000037095	76905	88	79	30810	24093	45969	10966.2	7.87257	0.265512	29.6505	3.34067e-193	1.7435e-189	UP
Hspa5	ENSMUSG00000026864	14828	3977	4106	11036	8917	22200	7349.85	1.00778	0.273992	3.67815	0.000234936	0.00141913	UP
Pla2g1b	ENSMUSG00000029522	18778	27498	30300	8306	7638	9712	16549.7	-2.5452	0.209479	-12.1502	5.72571e-34	1.75779e-31	DOWN
Neat1	ENSMUSG00000092274	66961	12231	8741	29450	28697	23771	14878.1	0.619175	0.214247	2.89	0.00385239	0.0157897	UP
Tff2	ENSMUSG00000024028	21785	18822	19374	8422	7627	6972	14851.8	-2.09893	0.166112	-12.6356	1.34382e-36	5.26006e-34	DOWN
ND1	ENSMUSG00000064341	17716	12842	13373	11092	11471	14903	12598.7	-0.85337	0.197979	-4.31041	1.6295e-05	0.000133576	DOWN
Txnip	ENSMUSG00000038393	56338	3341	2146	21018	18196	21790	6344.65	2.13	0.241091	8.83483	1.00247e-18	7.73183e-17	UP
Gm5771	ENSMUSG00000058119	436523	50135	58816	115	161	7019	16333.1	-5.28944	1.33522	-3.96147	7.44896e-05	0.000513821	DOWN
Cep85	ENSMUSG00000037443	70012	791	835	20922	27690	35878	8443.51	4.3342	0.232549	18.6378	1.58592e-77	2.75898e-74	UP
Spink1	ENSMUSG00000024503	20730	12883	12592	9905	10059	10611	11271.8	-1.1009	0.131037	-8.40144	4.4102e-17	2.77312e-15	DOWN
P4hb	ENSMUSG00000025130	18453	12312	11117	8793	9229	10862	10986.7	-1.0579	0.139497	-7.58371	3.35807e-14	1.3692e-12	DOWN
Xbp1	ENSMUSG00000020484	22433	4753	3911	12711	10840	20193	8960.37	0.975574	0.223536	4.36428	1.27544e-05	0.000107478	UP
ND2	ENSMUSG00000064345	17717	7881	7856	6360	6092	8136	8014.56	-0.979872	0.203144	-4.82352	1.41047e-06	1.50229e-05	DOWN
Ctsl	ENSMUSG00000021477	13039	2329	2072	10140	7939	15169	5695.18	1.55135	0.274723	5.64695	1.63323e-08	2.61201e-07	UP
Btg2	ENSMUSG00000020423	12227	431	349	8964	8062	25524	3513.38	4.40803	0.494771	8.90924	5.13825e-19	4.08374e-17	UP
Rrbp1	ENSMUSG00000027422	81910	7235	6375	5497	5434	6210	6679.32	-1.02659	0.161669	-6.34991	2.15443e-10	4.89577e-09	DOWN
1810009J06Rik	ENSMUSG00000094808	73626	41984	25873	142	225	356	8981.71	-7.88804	0.64377	-12.2529	1.62124e-34	5.28828e-32	DOWN
Ahcy	ENSMUSG00000027597	269378	3293	2573	12666	11388	12344	5488.23	1.27917	0.196368	6.51418	7.3088e-11	1.80211e-09	UP
Serpini2	ENSMUSG00000034139	67931	10415	9320	1617	2042	1094	7791.26	-3.40537	0.225703	-15.0878	1.94743e-51	1.52455e-48	DOWN
Krt8	ENSMUSG00000049382	16691	1086	844	7115	4206	13939	3563.14	2.34621	0.535094	4.38466	1.16166e-05	9.90102e-05	UP
Selenop	ENSMUSG00000064373	20363	2767	1824	6930	7620	6782	5752.19	0.875749	0.252671	3.46597	0.000528331	0.00289842	UP
Hmgcs2	ENSMUSG00000027875	15360	665	468	16232	16092	7573	4591.97	3.79504	0.647969	5.85682	4.71811e-09	8.27227e-08	UP
Rbpjl	ENSMUSG00000017007	19668	8446	7351	1606	2355	1855	6651.14	-2.79109	0.283368	-9.84973	6.87306e-23	7.63202e-21	DOWN
Por	ENSMUSG00000005514	18984	95	99	12045	9282	14662	2796.7	6.1628	0.32174	19.1546	8.85644e-82	1.98093e-78	UP
Serp1	ENSMUSG00000027808	28146	5857	5204	3818	3682	4141	5347.66	-1.28643	0.138331	-9.29963	1.40939e-20	1.28296e-18	DOWN
Rps2	ENSMUSG00000044533	16898	6197	5065	4911	4200	4802	4621.37	-1.05282	0.142364	-7.39526	1.41135e-13	5.29916e-12	DOWN
Rpl3	ENSMUSG00000060036	27367	5338	4839	4602	4304	4971	4469.82	-0.9145	0.119701	-7.63988	2.17418e-14	9.10386e-13	DOWN
Lbh	ENSMUSG00000024063	77889	2640	2404	7066	7222	5720	4301.86	0.629301	0.199593	3.15293	0.00161642	0.0075796	UP
Krt18	ENSMUSG00000023043	16668	1195	1000	5463	4166	8628	2922.16	1.69279	0.259608	6.52058	7.0037e-11	1.7296e-09	UP
Itprid2	ENSMUSG00000027007	70599	1988	1513	8519	7383	6992	3904.76	1.35614	0.192297	7.05229	1.75995e-12	5.56676e-11	UP
Ivns1abp	ENSMUSG00000023150	117198	1402	1293	10341	9709	8056	3525.83	2.02141	0.17173	11.7708	5.51696e-32	1.34967e-29	UP
Erp27	ENSMUSG00000030219	69187	3765	3593	3840	3821	3902	3994.52	-0.710814	0.12525	-5.67518	1.38545e-08	2.25021e-07	DOWN
Rnase4	ENSMUSG00000021876	58809	1861	1144	6443	5225	6540	3832.82	1.25481	0.171862	7.30127	2.85055e-13	1.02836e-11	UP
Gm2663	ENSMUSG00000096525	100040208	9153	5314	3410	3313	4515	3656.89	-1.70239	0.505606	-3.36704	0.000759807	0.00396015	DOWN
Srrm2	ENSMUSG00000039218	75956	4536	3982	3758	4185	2845	4323.12	-1.01338	0.180125	-5.62595	1.84487e-08	2.91361e-07	DOWN
Ctrc	ENSMUSG00000062478	76701	4991	5288	3098	4355	1830	4584.37	-1.50408	0.45953	-3.27308	0.00106381	0.00528428	DOWN
Dap	ENSMUSG00000039168	223453	3813	3672	3666	3301	4306	3837.33	-0.775614	0.16172	-4.79604	1.61831e-06	1.69032e-05	DOWN
Fgl2	ENSMUSG00000039899	14190	989	819	3459	2020	10001	1806.34	1.72964	0.61477	2.81347	0.00490099	0.0192995	UP
Eif4g2	ENSMUSG00000005610	13690	2119	1775	5589	4533	5649	3413.46	0.657504	0.108529	6.05834	1.37536e-09	2.69175e-08	UP
Hsp90ab1	ENSMUSG00000023944	15516	2288	1831	5709	4567	6481	3088.66	0.665639	0.151391	4.39682	1.09847e-05	9.41365e-05	UP
Ero1lb	ENSMUSG00000057069	67475	4838	4358	2263	3024	1712	4360.19	-1.74484	0.209604	-8.32446	8.47114e-17	5.12095e-15	DOWN
Trp53inp1	ENSMUSG00000028211	60599	340	249	5761	3375	9899	1656.57	3.65342	0.44316	8.24401	1.66529e-16	9.69274e-15	UP
Ddit4	ENSMUSG00000020108	74747	391	318	7318	4678	11202	1906.01	3.66722	0.299586	12.241	1.87761e-34	5.99952e-32	UP
Cdh1	ENSMUSG00000000303	12550	702	591	4298	2773	9638	1972.79	2.32438	0.489011	4.75324	2.00185e-06	2.03923e-05	UP
Gatm	ENSMUSG00000027199	67092	5262	4733	1685	1856	1782	4125.01	-2.26669	0.170957	-13.2589	4.0081e-40	1.90166e-37	DOWN
Hspa8	ENSMUSG00000015656	15481	1500	1270	5213	4697	6741	2716.54	1.22776	0.165415	7.42226	1.15137e-13	4.42922e-12	UP
Errfi1	ENSMUSG00000028967	74155	180	110	3933	2554	7606	1181.77	4.25269	0.652005	6.52248	6.9153e-11	1.71047e-09	UP
Slc39a5	ENSMUSG00000039878	72002	3776	3561	2703	2608	3234	3207.42	-1.14395	0.135222	-8.45984	2.67742e-17	1.77629e-15	DOWN
Mat1a	ENSMUSG00000037798	11720	814	889	10895	6136	8175	2550.45	2.50595	0.333059	7.52406	5.31016e-14	2.10484e-12	UP
Slc7a8	ENSMUSG00000022180	50934	1604	1524	5291	4634	6182	2488.66	0.998337	0.142992	6.98177	2.91474e-12	8.9133e-11	UP
Pdcd4	ENSMUSG00000024975	18569	1509	1215	4260	3152	6687	2492.78	1.01002	0.242605	4.16322	3.13796e-05	0.000238771	UP
Cst3	ENSMUSG00000027447	13010	3302	3174	2686	2542	2412	2993	-1.1254	0.125682	-8.95433	3.41816e-19	2.802e-17	DOWN
Tle5	ENSMUSG00000054452	14797	3503	3601	2152	2211	2477	3165.04	-1.42161	0.155436	-9.14595	5.91076e-20	5.05709e-18	DOWN
Malat1	ENSMUSG00000092341	72289	1824	1362	4908	4055	4094	2676.27	0.681545	0.122011	5.58591	2.32473e-08	3.60023e-07	UP
Dnajc3	ENSMUSG00000022136	100037258	2780	2561	2895	3026	2861	3029.46	-0.64232	0.122293	-5.25232	1.50192e-07	1.92435e-06	DOWN
Map1lc3b	ENSMUSG00000031812	67443	1138	1086	5803	4430	7480	2437.75	1.62407	0.181612	8.94255	3.80294e-19	3.10118e-17	UP
Actb	ENSMUSG00000029580	11461	607	469	5364	4209	7236	2389.37	2.60729	0.208949	12.4781	9.8307e-36	3.49816e-33	UP
Actg1	ENSMUSG00000062825	11465	396	349	5237	3944	8516	2236.68	3.20367	0.2911	11.0054	3.59968e-28	6.79039e-26	UP
Cd24a	ENSMUSG00000047139	12484	1159	1196	3313	2415	4839	1779.52	0.790629	0.234715	3.36847	0.000755861	0.00394484	UP
Gls2	ENSMUSG00000044005	216456	1602	1339	5840	6086	3169	2546.37	1.00803	0.254564	3.95981	7.50085e-05	0.00051645	UP
Tmed6	ENSMUSG00000031919	66269	3497	3363	1866	2165	1500	2902.76	-1.66922	0.187057	-8.92359	4.51412e-19	3.62449e-17	DOWN
Lifr	ENSMUSG00000054263	16880	1535	1159	3842	3535	3968	2096.76	0.721765	0.142058	5.08076	3.7593e-07	4.46242e-06	UP
Sqstm1	ENSMUSG00000015837	18412	1256	1102	3466	2893	5629	2191.49	0.981592	0.218059	4.5015	6.74752e-06	6.11731e-05	UP
Gm10334	ENSMUSG00000071517	100040233	15397	11448	87	81	952	3600.5	-5.94478	1.18331	-5.02386	5.06443e-07	5.86493e-06	DOWN
Srsf5	ENSMUSG00000021134	20384	2698	2617	3075	3193	2763	2743.11	-0.597368	0.139567	-4.28014	1.86772e-05	0.000150976	DOWN
Serpinb1a	ENSMUSG00000044734	66222	1345	1068	3697	3282	4085	2291.64	0.840781	0.137631	6.10893	1.00299e-09	1.99035e-08	UP
H1f0	ENSMUSG00000096210	14958	1368	1290	3941	3191	5464	2130.64	0.876456	0.197797	4.43108	9.37622e-06	8.20131e-05	UP
Ggt1	ENSMUSG00000006345	14598	2488	2644	2795	2610	2684	2513.38	-0.713344	0.134811	-5.29142	1.21372e-07	1.59423e-06	DOWN
Vmp1	ENSMUSG00000018171	75909	247	278	5796	5064	7224	1741.11	3.7325	0.201095	18.5609	6.66367e-77	1.04333e-73	UP
Chst2	ENSMUSG00000033350	54371	2181	1769	2096	2557	1045	2606.66	-0.816881	0.27154	-3.00832	0.00262692	0.0114186	DOWN
Ssr4	ENSMUSG00000002014	20832	2600	2683	2085	1982	2275	2356.02	-1.10487	0.135692	-8.14251	3.87176e-16	2.11958e-14	DOWN
Glul	ENSMUSG00000026473	14645	304	250	5299	4125	4033	1271.99	3.24281	0.243353	13.3256	1.64389e-40	8.04324e-38	UP
Aqp12	ENSMUSG00000045091	208760	2670	2929	1757	1827	2322	2336.37	-1.29401	0.184039	-7.03117	2.04802e-12	6.38762e-11	DOWN
Edem3	ENSMUSG00000043019	66967	890	701	2581	2095	2986	1479.63	0.909898	0.154153	5.90256	3.57903e-09	6.3969e-08	UP
Ftl1	ENSMUSG00000050708	14325	2606	2230	1923	1713	2726	2303.33	-0.965438	0.193289	-4.9948	5.88974e-07	6.77558e-06	DOWN
Snrnp70	ENSMUSG00000063511	20637	2581	2395	2506	2638	2238	2388.65	-0.790447	0.131676	-6.00295	1.93764e-09	3.67728e-08	DOWN
Fbxo31	ENSMUSG00000052934	76454	947	995	5182	4464	4605	1900.92	1.50462	0.27639	5.44384	5.21439e-08	7.38838e-07	UP
Gadd45b	ENSMUSG00000015312	17873	138	136	2246	1420	3846	621.957	3.40147	0.576529	5.89991	3.63694e-09	6.47822e-08	UP
Asns	ENSMUSG00000029752	27053	1914	1808	1855	1809	2501	1987.01	-0.636286	0.172722	-3.68387	0.000229724	0.00139194	DOWN
Bhlha15	ENSMUSG00000052271	17341	2930	3226	800	1041	511	2681.66	-2.74997	0.282452	-9.73604	2.11642e-22	2.22394e-20	DOWN
Ang	ENSMUSG00000072115	11727	592	367	4348	3815	3623	1964.84	2.27536	0.156084	14.5777	3.89139e-48	2.90131e-45	UP
Clstn1	ENSMUSG00000039953	65945	2008	1720	2062	2058	2074	2041.75	-0.62462	0.116232	-5.37392	7.70446e-08	1.05077e-06	DOWN
Chd9	ENSMUSG00000056608	109151	260	244	4201	2646	8189	1489.77	3.52576	0.324937	10.8506	1.98155e-27	3.48598e-25	UP
Slc16a6	ENSMUSG00000041920	104681	273	250	2492	1754	8287	1231.03	3.21076	0.639027	5.02446	5.04855e-07	5.85087e-06	UP
Rab11fip5	ENSMUSG00000051343	52055	173	145	4333	3323	6231	1367.17	4.0854	0.239174	17.0813	2.04654e-65	2.46482e-62	UP
Myh9	ENSMUSG00000022443	17886	560	472	3295	2570	5519	1460.24	2.0999	0.249382	8.42043	3.75104e-17	2.39714e-15	UP
Pdk4	ENSMUSG00000019577	27273	60	37	4970	3536	6298	1102.9	5.90476	0.597013	9.89051	4.57709e-23	5.23091e-21	UP
Eif2ak3	ENSMUSG00000031668	13666	795	752	2560	2362	4146	1686.65	1.18485	0.243098	4.87398	1.09374e-06	1.19419e-05	UP
Rhou	ENSMUSG00000039960	69581	482	437	2829	2554	4203	1292.3	2.01877	0.204926	9.85123	6.77071e-23	7.62655e-21	UP
Vars	ENSMUSG00000007029	22321	582	500	2900	2664	3510	1472.68	1.70813	0.15298	11.1657	5.99951e-29	1.24824e-26	UP
Slc38a3	ENSMUSG00000010064	76257	2133	1774	1929	2035	2155	1958.32	-0.707586	0.140056	-5.05218	4.36797e-07	5.11131e-06	DOWN
Luc7l2	ENSMUSG00000029823	192196	2011	1775	2104	2097	2250	1938.68	-0.590124	0.143848	-4.10241	4.08871e-05	0.000301682	DOWN
Cxxc1	ENSMUSG00000024560	74322	774	651	2275	1986	3812	1308.7	1.14072	0.219808	5.18962	2.10719e-07	2.63097e-06	UP
Tnks1bp1	ENSMUSG00000033955	228140	501	509	2475	2033	6566	1205.84	2.07987	0.525036	3.96139	7.45141e-05	0.000513821	UP
Nucb2	ENSMUSG00000030659	53322	2287	2455	1176	1087	1327	1922.51	-1.77292	0.165938	-10.6843	1.20596e-26	2.01743e-24	DOWN
Eif1	ENSMUSG00000035530	20918	1062	892	2737	2394	3567	1537.66	0.794141	0.16483	4.81794	1.45047e-06	1.54175e-05	UP
Ndrg1	ENSMUSG00000005125	17988	915	719	2898	2212	4702	1486.86	1.22609	0.306554	3.99958	6.34544e-05	0.000447122	UP
Tram1	ENSMUSG00000025935	72265	2333	2000	1178	1352	1266	1943.13	-1.54529	0.143411	-10.7752	4.50613e-27	7.66875e-25	DOWN
Gucd1	ENSMUSG00000033416	68778	917	893	5265	4229	3322	1678.98	1.45691	0.213889	6.81151	9.6577e-12	2.72943e-10	UP
Cbs	ENSMUSG00000024039	12411	1871	1773	1965	1979	1646	1825.47	-0.74399	0.163064	-4.56257	5.05302e-06	4.67032e-05	DOWN
Mcl1	ENSMUSG00000038612	17210	1011	879	2450	2178	4358	1481.78	0.886148	0.236032	3.75435	0.000173793	0.00108669	UP
Slc6a9	ENSMUSG00000028542	14664	925	880	2972	2824	3070	1433.59	0.932756	0.141572	6.58856	4.44102e-11	1.13802e-09	UP
Wbp1l	ENSMUSG00000047731	226178	539	480	3716	3449	3328	1356.64	2.00419	0.163421	12.264	1.41412e-34	4.71082e-32	UP
Ctnnb1	ENSMUSG00000006932	12387	947	891	2825	2322	2603	1706.36	0.710435	0.138371	5.13429	2.83212e-07	3.44329e-06	UP
Lrrc59	ENSMUSG00000020869	98238	881	791	2274	1837	2770	1562.44	0.676168	0.187791	3.60065	0.000317421	0.00184822	UP
Acox1	ENSMUSG00000020777	11430	483	361	4504	3505	5860	1478.76	2.68207	0.273887	9.79263	1.21109e-22	1.28994e-20	UP
Appl2	ENSMUSG00000020263	216190	2145	1749	2145	2154	1298	1886.54	-0.82842	0.215644	-3.84161	0.000122229	0.000797061	DOWN
Rpl38	ENSMUSG00000057322	67671	1649	1761	1816	1652	2265	1580.78	-0.622456	0.194671	-3.19748	0.00138632	0.00664594	DOWN
Sidt2	ENSMUSG00000034908	214597	771	746	2896	2645	3485	1477.09	1.20692	0.151554	7.96363	1.67064e-15	8.33033e-14	UP
Hbs1l	ENSMUSG00000019977	56422	498	475	3104	2326	4120	1176.73	1.92531	0.201214	9.56847	1.08503e-21	1.07521e-19	UP
Ifrd1	ENSMUSG00000001627	15982	2039	1845	1833	1693	1432	1749.31	-1.00839	0.214833	-4.69383	2.68138e-06	2.66217e-05	DOWN
Cdkn1a	ENSMUSG00000023067	12575	41	24	3504	2178	4610	927.713	5.95551	0.489392	12.1692	4.53575e-34	1.42032e-31	UP
Prdx4	ENSMUSG00000025289	53381	2140	1939	1179	1237	1083	1733.47	-1.57982	0.133612	-11.8239	2.93644e-32	7.29776e-30	DOWN
Ssr3	ENSMUSG00000027828	67437	1594	1413	1425	1302	2039	1557.33	-0.698074	0.196702	-3.54889	0.000386852	0.00220412	DOWN
Stat3	ENSMUSG00000004040	20848	257	201	3149	2354	4459	1119.82	3.08287	0.245746	12.545	4.2358e-36	1.61756e-33	UP
Lcn2	ENSMUSG00000026822	16819	7	11	3399	1774	5849	924.384	7.86809	0.616964	12.7529	3.00316e-37	1.20565e-34	UP
Sesn1	ENSMUSG00000038332	140742	422	479	2945	2075	2841	829.046	1.74636	0.22088	7.90636	2.65025e-15	1.25742e-13	UP
Reep5	ENSMUSG00000005873	13476	2333	2563	844	798	954	1881.22	-2.28751	0.167115	-13.6882	1.1937e-42	7.18839e-40	DOWN
Erbb3	ENSMUSG00000018166	13867	226	169	3882	3138	4796	1064.41	3.54683	0.273525	12.9671	1.87993e-38	8.17612e-36	UP
C77080	ENSMUSG00000050390	97130	340	249	2877	2200	4819	1154.79	2.71362	0.262489	10.338	4.74219e-25	7.00457e-23	UP
Itgb4	ENSMUSG00000020758	192897	394	240	3046	2566	3863	1249.57	2.55622	0.218307	11.7093	1.14194e-31	2.70899e-29	UP
Phgdh	ENSMUSG00000053398	236539	1457	1434	1388	1425	2048	1491.11	-0.616284	0.201577	-3.05731	0.0022333	0.00994789	DOWN
Cdc42bpg	ENSMUSG00000024769	240505	854	819	2279	2058	2664	1370.34	0.699571	0.140814	4.96805	6.7628e-07	7.6964e-06	UP
Eif4a1	ENSMUSG00000059796	13681	856	789	2075	1736	2779	1340.82	0.636286	0.177582	3.58306	0.000339592	0.00196344	UP
Sbno2	ENSMUSG00000035673	216161	109	99	2088	1688	5339	906.697	4.08487	0.587358	6.95465	3.53443e-12	1.0642e-10	UP
Bsg	ENSMUSG00000023175	12215	1709	1602	1617	1693	1598	1579.72	-0.792777	0.146895	-5.39689	6.78067e-08	9.36199e-07	DOWN
Tmed10	ENSMUSG00000021248	68581	1712	1513	1344	1419	1608	1582.43	-0.919735	0.157564	-5.83722	5.30775e-09	9.24399e-08	DOWN
Ptprf	ENSMUSG00000033295	19268	949	828	2428	2286	2128	1382.02	0.586343	0.135665	4.322	1.54621e-05	0.000127955	UP
H6pd	ENSMUSG00000028980	100198	119	96	3922	2796	6910	1185.6	4.62273	0.318139	14.5305	7.76091e-48	5.5233e-45	UP
Rpl35a	ENSMUSG00000060636	57808	1597	1290	1719	1097	1970	1384.24	-0.634267	0.196248	-3.23198	0.00122937	0.00599076	DOWN
Sec11c	ENSMUSG00000024516	66286	1773	1698	1009	1177	1229	1599.39	-1.38411	0.153222	-9.03334	1.66513e-19	1.40167e-17	DOWN
Dpp9	ENSMUSG00000001229	224897	502	349	3248	2241	3688	1052.86	2.07585	0.205779	10.0878	6.25734e-24	7.96514e-22	UP
Slc25a51	ENSMUSG00000045973	230125	596	498	2565	2201	3075	1040.22	1.48149	0.146504	10.1123	4.87387e-24	6.30663e-22	UP
Ppib	ENSMUSG00000032383	19035	1846	1730	1339	1272	1187	1565.13	-1.27536	0.1173	-10.8727	1.55567e-27	2.76785e-25	DOWN
Perp	ENSMUSG00000019851	64058	409	394	2695	2284	2938	1034.62	1.93511	0.155013	12.4835	9.18116e-36	3.42261e-33	UP
Lamp1	ENSMUSG00000031447	16783	1513	1307	1510	1432	1563	1489.7	-0.682935	0.119675	-5.70657	1.15277e-08	1.88993e-07	DOWN
Spint1	ENSMUSG00000027315	20732	574	534	2151	2154	2592	1167.21	1.27595	0.185684	6.87159	6.34917e-12	1.84091e-10	UP
Rela	ENSMUSG00000024927	19697	208	144	2402	1995	4325	970.601	3.27771	0.290568	11.2804	1.64046e-29	3.51844e-27	UP
Qsox1	ENSMUSG00000033684	104009	1572	1558	1388	1351	1524	1430.24	-0.920029	0.152654	-6.02687	1.67166e-09	3.21934e-08	DOWN
Slc25a5	ENSMUSG00000016319	11740	1642	1351	1570	1527	1561	1380.42	-0.717397	0.135259	-5.30386	1.1338e-07	1.49806e-06	DOWN
Clic4	ENSMUSG00000037242	29876	416	320	2342	1501	4457	1016.32	2.13294	0.307307	6.94076	3.90004e-12	1.16532e-10	UP
Slc39a14	ENSMUSG00000022094	213053	557	432	1733	945	3305	903.33	1.2319	0.471634	2.61198	0.00900208	0.0320476	UP
Myo18a	ENSMUSG00000000631	360013	831	629	1942	1610	2611	1242.06	0.721695	0.186137	3.87722	0.000105658	0.000698896	UP
Stard10	ENSMUSG00000030688	56018	1366	1361	1389	1239	1304	1395.44	-0.838934	0.125085	-6.70691	1.98791e-11	5.32958e-10	DOWN
Ctdsp2	ENSMUSG00000078429	52468	712	556	2697	2246	3104	1221.7	1.30912	0.226725	5.77405	7.73898e-09	1.30711e-07	UP
Hspb1	ENSMUSG00000004951	15507	179	162	2032	1043	5587	813.273	3.29245	0.587294	5.60613	2.06904e-08	3.23302e-07	UP
Bcat2	ENSMUSG00000030826	12036	1783	1661	1209	1067	1226	1431.5	-1.34006	0.141816	-9.44926	3.4123e-21	3.2577e-19	DOWN
Chp1	ENSMUSG00000014077	56398	834	591	1877	1641	2294	1112.56	0.67665	0.156766	4.3163	1.58663e-05	0.00013054	UP
Ggh	ENSMUSG00000073987	14590	1938	1925	855	930	669	1538.73	-2.01643	0.19777	-10.1958	2.06934e-24	2.81736e-22	DOWN
Etf1	ENSMUSG00000024360	225363	683	624	2042	1955	2171	1195.86	0.877421	0.112242	7.81724	5.39928e-15	2.43621e-13	UP
Mgll	ENSMUSG00000033174	23945	529	446	2548	2375	2774	1197.64	1.62264	0.160887	10.0856	6.39759e-24	8.078e-22	UP
Cdc42ep1	ENSMUSG00000049521	104445	584	509	2203	2067	2940	1171.14	1.36097	0.238491	5.7066	1.15256e-08	1.88993e-07	UP
Eif4h	ENSMUSG00000040731	22384	789	608	2106	1822	2737	1192.84	0.898257	0.164221	5.4698	4.50533e-08	6.49539e-07	UP
Stk11	ENSMUSG00000003068	20869	708	576	2057	2004	2369	1126.8	0.968444	0.15656	6.18577	6.17999e-10	1.29186e-08	UP
Ddb1	ENSMUSG00000024740	13194	708	553	2293	1822	2693	1164.08	1.07464	0.159807	6.72458	1.76101e-11	4.76204e-10	UP
Muc1	ENSMUSG00000042784	17829	1648	1474	833	833	1070	1473.9	-1.55101	0.195305	-7.94147	1.99799e-15	9.81208e-14	DOWN
Fkbp5	ENSMUSG00000024222	14229	127	117	4492	2853	4245	941.168	4.19992	0.302935	13.8641	1.04529e-43	6.81922e-41	UP
Tmed3	ENSMUSG00000032353	66111	1275	1168	1167	1369	1272	1362.68	-0.717057	0.130312	-5.50261	3.74216e-08	5.45539e-07	DOWN
Gorasp2	ENSMUSG00000014959	70231	1420	1161	1360	1353	1451	1301.07	-0.664953	0.161557	-4.11589	3.85682e-05	0.000286191	DOWN
Mknk2	ENSMUSG00000020190	17347	212	235	3437	2591	4270	964.506	3.14934	0.259501	12.1361	6.79611e-34	2.00767e-31	UP
Mbd1	ENSMUSG00000024561	17190	206	189	3539	2158	3338	852.45	3.14517	0.229689	13.6932	1.11535e-42	6.98519e-40	UP
Eppk1	ENSMUSG00000115388	223650	24	24	3222	1666	8836	1004.39	6.78052	0.754987	8.98097	2.68387e-19	2.22335e-17	UP
Adcy6	ENSMUSG00000022994	11512	824	700	2601	2357	2094	1269.21	0.852361	0.150347	5.66928	1.43399e-08	2.32182e-07	UP
Oaz1	ENSMUSG00000035242	18245	1395	1392	1514	1348	1253	1394.26	-0.804488	0.142676	-5.63855	1.71491e-08	2.7287e-07	DOWN
Smarcc2	ENSMUSG00000025369	68094	1342	1354	1493	1434	1521	1396.53	-0.64411	0.140197	-4.59431	4.34177e-06	4.09759e-05	DOWN
Slc39a8	ENSMUSG00000053897	67547	139	112	2359	1778	3015	869.254	3.4713	0.25977	13.363	9.94918e-41	5.02498e-38	UP
Dstn	ENSMUSG00000015932	56431	595	507	2453	1806	3189	1193.23	1.39251	0.209396	6.65015	2.92801e-11	7.66621e-10	UP
Prss1	ENSMUSG00000062751	114228	6739	5751	32	32	573	1754.05	-5.66343	1.2238	-4.62773	3.69687e-06	3.54886e-05	DOWN
Selenof	ENSMUSG00000037072	93684	1511	1384	1342	1161	1398	1316.35	-0.933599	0.176396	-5.29264	1.20561e-07	1.5849e-06	DOWN
Hectd1	ENSMUSG00000035247	207304	466	358	2210	1875	2139	1040.05	1.56162	0.150989	10.3426	4.52128e-25	6.74187e-23	UP
Gstp1	ENSMUSG00000060803	14870	1827	1363	1324	1045	1197	1340.23	-1.1937	0.13698	-8.71439	2.92319e-18	2.2004e-16	DOWN
Grn	ENSMUSG00000034708	14824	716	572	1902	1755	2326	1014.65	0.859396	0.144782	5.93578	2.92453e-09	5.2997e-08	UP
Chmp4b	ENSMUSG00000038467	75608	630	570	1890	1392	2441	1008.96	0.88652	0.19804	4.47648	7.5884e-06	6.78923e-05	UP
Pfn1	ENSMUSG00000018293	18643	608	544	1913	1596	2828	1101.58	1.09482	0.197309	5.54875	2.87715e-08	4.34402e-07	UP
Irak1	ENSMUSG00000031392	16179	1282	1293	1251	1407	1360	1326.5	-0.72139	0.139767	-5.16137	2.45148e-07	3.01514e-06	DOWN
Cep170b	ENSMUSG00000072825	217882	433	364	2487	1796	2602	1031.3	1.74762	0.15661	11.1591	6.46721e-29	1.30884e-26	UP
Furin	ENSMUSG00000030530	18550	535	553	1942	1563	2445	1074.2	1.07916	0.184141	5.8605	4.61481e-09	8.10933e-08	UP
Dvl1	ENSMUSG00000029071	13542	717	648	1915	1849	2205	1093.52	0.767607	0.126902	6.0488	1.4593e-09	2.84183e-08	UP
Akt1	ENSMUSG00000001729	11651	1516	1342	1457	1284	1222	1347.14	-0.889148	0.147838	-6.01433	1.80629e-09	3.45156e-08	DOWN
Rps27l	ENSMUSG00000036781	67941	1185	1166	1345	1156	1359	1219.86	-0.652064	0.141115	-4.62081	3.82248e-06	3.65599e-05	DOWN
Aff4	ENSMUSG00000049470	93736	507	430	1794	1353	2388	882.76	1.19889	0.19866	6.03487	1.59089e-09	3.07682e-08	UP
Gm4737	ENSMUSG00000048087	11615	603	471	2261	2139	2185	1022.17	1.26277	0.186305	6.77797	1.21877e-11	3.39542e-10	UP
Derl3	ENSMUSG00000009092	70377	1659	1691	733	898	944	1371.87	-1.7429	0.167209	-10.4235	1.93694e-25	2.9732e-23	DOWN
Junb	ENSMUSG00000052837	16477	44	40	1511	1589	3521	675.652	4.9367	0.609667	8.09736	5.61624e-16	3.00114e-14	UP
Rnpepl1	ENSMUSG00000026269	108657	656	620	1936	1793	1899	1107.1	0.777742	0.134497	5.7826	7.35567e-09	1.24911e-07	UP
Tmem131	ENSMUSG00000026116	56030	634	555	2040	2033	1624	1053.09	0.903432	0.202664	4.45778	8.28133e-06	7.35038e-05	UP
Actn1	ENSMUSG00000015143	109711	418	261	1694	1192	3191	930.893	1.81162	0.309077	5.86138	4.5904e-09	8.07549e-08	UP
Iapp	ENSMUSG00000041681	15874	592	661	2037	1499	1658	1071.49	0.674469	0.254741	2.64766	0.00810505	0.0292903	UP
Gjb2	ENSMUSG00000046352	14619	216	207	1735	953	4289	733.715	2.66722	0.579246	4.60465	4.13165e-06	3.91222e-05	UP
Cfl1	ENSMUSG00000056201	12631	572	566	1753	1306	2346	1009.65	0.876005	0.213334	4.10627	4.02099e-05	0.000297245	UP
Aldh1l1	ENSMUSG00000030088	107747	420	387	2137	1203	3115	818.069	1.62649	0.315599	5.15368	2.5543e-07	3.13177e-06	UP
Sdcbp	ENSMUSG00000028249	53378	623	543	1579	1316	2024	971.778	0.713976	0.168138	4.24638	2.17254e-05	0.000172376	UP
Tent5c	ENSMUSG00000044468	74645	1354	1185	970	966	627	1345.98	-1.34261	0.25857	-5.19244	2.07559e-07	2.59979e-06	DOWN
Cmtm4	ENSMUSG00000096188	97487	715	627	1875	1767	2055	1045.69	0.725972	0.13102	5.54094	3.0085e-08	4.51621e-07	UP
Trpc4ap	ENSMUSG00000038324	56407	557	455	2149	1767	2087	983.614	1.20946	0.120845	10.0083	1.40093e-23	1.67438e-21	UP
Gcn1	ENSMUSG00000041638	231659	317	296	2133	1663	2268	888.601	1.93996	0.160152	12.1132	8.98887e-34	2.60627e-31	UP
Gsn	ENSMUSG00000026879	227753	1415	925	1537	1355	834	1115.65	-0.671921	0.23217	-2.89409	0.00380255	0.0156182	DOWN
Pim3	ENSMUSG00000035828	223775	1511	1716	802	796	683	1122.59	-1.8723	0.441759	-4.23827	2.25246e-05	0.000178025	DOWN
Itm2b	ENSMUSG00000022108	16432	1235	1021	1208	1115	1170	1195.39	-0.726133	0.131411	-5.52565	3.28262e-08	4.86244e-07	DOWN
Pnpla2	ENSMUSG00000025509	66853	210	193	2163	1516	3627	722.502	2.81052	0.275424	10.2043	1.89637e-24	2.60451e-22	UP
Itgb1	ENSMUSG00000025809	16412	637	486	1686	1359	1901	997.711	0.78239	0.153974	5.08133	3.74811e-07	4.45252e-06	UP
Plxnd1	ENSMUSG00000030123	67784	1172	989	941	937	890	1171.48	-0.998886	0.189113	-5.28195	1.27813e-07	1.66764e-06	DOWN
Nfe2l1	ENSMUSG00000038615	18023	503	524	2102	1810	2667	1008.47	1.30828	0.189349	6.90935	4.86888e-12	1.4249e-10	UP
Ssr1	ENSMUSG00000021427	107513	1325	1128	841	847	967	1186.03	-1.24312	0.145252	-8.55836	1.14481e-17	8.00195e-16	DOWN
Tagln2	ENSMUSG00000026547	21346	254	183	1296	1027	2676	662.246	2.15978	0.337081	6.40731	1.48113e-10	3.44578e-09	UP
Magt1	ENSMUSG00000031232	67075	1299	1119	1110	1113	1185	1208.7	-0.862514	0.12475	-6.91397	4.71288e-12	1.38183e-10	DOWN
Arhgdig	ENSMUSG00000073433	14570	1795	1647	1001	900	1057	1180.53	-1.58182	0.162398	-9.74037	2.02818e-22	2.14562e-20	DOWN
Plxnb2	ENSMUSG00000036606	140570	437	315	2023	1823	2197	911.452	1.65496	0.178883	9.25161	2.21139e-20	1.95614e-18	UP
Lman1	ENSMUSG00000041891	70361	1447	1307	837	799	857	1232.27	-1.50455	0.138948	-10.8282	2.53126e-27	4.35515e-25	DOWN
Dnajb11	ENSMUSG00000004460	67838	1049	973	1119	945	1152	1115.63	-0.695161	0.132875	-5.23171	1.67947e-07	2.13958e-06	DOWN
Epb41	ENSMUSG00000028906	269587	503	511	1514	1187	2395	834.727	0.956398	0.235056	4.06881	4.72545e-05	0.000345408	UP
Aldh7a1	ENSMUSG00000053644	110695	1140	1081	1254	1148	1174	1121.98	-0.676632	0.132545	-5.10491	3.3095e-07	3.96759e-06	DOWN
Lztr1	ENSMUSG00000022761	66863	537	444	1806	1572	2201	973.552	1.14846	0.147867	7.76686	8.04525e-15	3.57854e-13	UP
Eif4ebp1	ENSMUSG00000031490	13685	595	608	1528	1253	2265	941.092	0.696425	0.21112	3.29872	0.00097126	0.00490549	UP
Ddi2	ENSMUSG00000078515	68817	264	221	2218	2301	2837	909.898	2.56648	0.213311	12.0316	2.42303e-33	6.8977e-31	UP
Csrp1	ENSMUSG00000026421	13007	635	637	1557	1114	2404	937.175	0.622399	0.24449	2.5457	0.0109058	0.0374785	UP
Rab1a	ENSMUSG00000020149	19324	1053	1005	957	830	1038	1086.7	-0.908779	0.137507	-6.60895	3.87043e-11	9.99989e-10	DOWN
Jup	ENSMUSG00000001552	16480	363	289	1765	1310	2521	718.894	1.74042	0.221056	7.8732	3.45672e-15	1.5987e-13	UP
B4galnt1	ENSMUSG00000006731	14421	554	512	1889	1604	1900	881.875	0.974861	0.133905	7.28027	3.33156e-13	1.18282e-11	UP
Cyp39a1	ENSMUSG00000023963	56050	331	339	1618	1376	1570	751.58	1.39877	0.220689	6.33821	2.32449e-10	5.25932e-09	UP
Akt2	ENSMUSG00000004056	11652	695	537	1680	1621	1772	984.146	0.688859	0.159415	4.32116	1.55208e-05	0.000128242	UP
Ddr1	ENSMUSG00000003534	12305	211	186	2086	1707	2998	811.578	2.73219	0.227932	11.9869	4.16262e-33	1.11e-30	UP
Rpn2	ENSMUSG00000027642	20014	1211	1151	879	864	1036	1100.99	-1.12903	0.149507	-7.55169	4.29646e-14	1.72486e-12	DOWN
Nucb1	ENSMUSG00000030824	18220	1189	949	1067	1025	971	1046.1	-0.835395	0.121123	-6.89709	5.30801e-12	1.54475e-10	DOWN
St6galnac4	ENSMUSG00000079442	20448	407	425	2343	2248	2062	955.733	1.63235	0.1888	8.64594	5.33636e-18	3.90427e-16	UP
Ucp2	ENSMUSG00000033685	22228	163	158	2218	1861	2767	791.27	3.04735	0.224123	13.5967	4.18676e-42	2.26042e-39	UP
Camk2b	ENSMUSG00000057897	12323	1511	1286	1124	1140	1138	1139.73	-1.07387	0.203533	-5.27612	1.31947e-07	1.71586e-06	DOWN
Sdc4	ENSMUSG00000017009	20971	241	241	1396	994	4097	673.218	2.37425	0.535282	4.43551	9.18539e-06	8.07046e-05	UP
Scrib	ENSMUSG00000022568	105782	275	284	1918	1625	2044	814.599	1.95215	0.163915	11.9096	1.05532e-32	2.70872e-30	UP
Tbc1d9b	ENSMUSG00000036644	76795	480	483	1587	1365	2246	822.559	1.06247	0.191856	5.53786	3.06196e-08	4.58329e-07	UP
Sephs2	ENSMUSG00000049091	20768	596	430	1895	1652	2067	1014.46	1.09982	0.158111	6.95597	3.50135e-12	1.05627e-10	UP
Lama5	ENSMUSG00000015647	16776	331	287	1366	1115	1932	755.515	1.47262	0.2458	5.99114	2.08373e-09	3.90717e-08	UP
Npm1	ENSMUSG00000057113	18148	1144	867	1120	1202	899	998.941	-0.668414	0.16542	-4.04071	5.329e-05	0.00038291	DOWN
Wdr26	ENSMUSG00000038733	226757	680	555	1810	1465	2092	969.878	0.75986	0.154545	4.91677	8.79837e-07	9.81169e-06	UP
Mmp15	ENSMUSG00000031790	17388	334	331	1645	2178	957	863.797	1.49099	0.302479	4.92924	8.25495e-07	9.22539e-06	UP
Bckdk	ENSMUSG00000030802	12041	1313	1292	822	983	607	1176.96	-1.46971	0.20205	-7.27402	3.48949e-13	1.2333e-11	DOWN
Nes	ENSMUSG00000004891	18008	405	335	1220	1232	2659	915.249	1.42868	0.302709	4.71965	2.36253e-06	2.38185e-05	UP
Galnt11	ENSMUSG00000038072	231050	294	189	1513	1195	1305	520.299	1.70816	0.503843	3.39026	0.000698261	0.00367856	UP
Hnrnpa0	ENSMUSG00000007836	77134	487	472	1718	1034	2127	784.74	0.972619	0.244353	3.98038	6.88062e-05	0.000479866	UP
Cldn3	ENSMUSG00000070473	12739	353	304	1565	1427	2382	750.07	1.6707	0.231573	7.21455	5.4112e-13	1.84582e-11	UP
Klf6	ENSMUSG00000000078	23849	186	99	926	841	2526	443.877	2.57338	0.573504	4.48712	7.21911e-06	6.48849e-05	UP
Sypl	ENSMUSG00000020570	19027	1233	890	1080	1150	801	1028.54	-0.831503	0.178099	-4.66876	3.03026e-06	2.9653e-05	DOWN
Ggta1	ENSMUSG00000035778	14594	433	398	1731	1428	2594	849.248	1.42496	0.211445	6.73913	1.59338e-11	4.3387e-10	UP
Insr	ENSMUSG00000005534	16337	525	417	1799	1604	2127	914.482	1.1969	0.176878	6.76679	1.31669e-11	3.62311e-10	UP
Fam120a	ENSMUSG00000038014	218236	661	527	1594	1366	1689	922.063	0.611158	0.132303	4.61939	3.84875e-06	3.67663e-05	UP
Gramd1a	ENSMUSG00000001248	52857	568	477	1382	1273	1606	838.799	0.669192	0.205639	3.2542	0.0011371	0.00561189	UP
Actn4	ENSMUSG00000054808	60595	413	423	1608	1191	2156	839.879	1.19381	0.219397	5.44132	5.2887e-08	7.48535e-07	UP
Aldoa	ENSMUSG00000030695	11674	1006	1005	1151	940	1284	986.578	-0.622808	0.174402	-3.57111	0.000355473	0.00204169	DOWN
Npdc1	ENSMUSG00000015094	18146	645	584	1784	1482	1896	893.023	0.706695	0.128123	5.51576	3.47275e-08	5.11023e-07	UP
Mapkapk2	ENSMUSG00000016528	17164	270	222	1515	998	2252	632.885	1.91092	0.255536	7.47807	7.54202e-14	2.93016e-12	UP
Rgs2	ENSMUSG00000026360	19735	75	31	809	240	1401	203.492	3.18908	0.708619	4.50041	6.78215e-06	6.14515e-05	UP
Alkbh5	ENSMUSG00000042650	268420	477	437	1280	1075	1448	785.779	0.692624	0.142025	4.87677	1.07839e-06	1.18155e-05	UP
Flnb	ENSMUSG00000025278	286940	499	456	1552	971	2431	791.501	1.00378	0.268162	3.7432	0.000181693	0.00112932	UP
Litaf	ENSMUSG00000022500	56722	317	300	1382	1148	2603	752.608	1.68754	0.275744	6.11996	9.35979e-10	1.87639e-08	UP
Gm9861	ENSMUSG00000022500	545182	317	300	1382	1148	2603	752.608	1.68754	0.275744	6.11996	9.35979e-10	1.87639e-08	UP
Lcmt1	ENSMUSG00000030763	30949	1039	936	1060	1013	1018	958.752	-0.714138	0.130425	-5.47545	4.36404e-08	6.30329e-07	DOWN
Plec	ENSMUSG00000022565	18810	441	336	1573	1280	2294	790.946	1.37054	0.210647	6.50633	7.70114e-11	1.88696e-09	UP
Nek7	ENSMUSG00000026393	59125	270	217	1441	1131	1881	588.308	1.83259	0.232156	7.89378	2.93157e-15	1.37424e-13	UP
St14	ENSMUSG00000031995	19143	214	156	1324	1133	2396	662.118	2.35807	0.28888	8.16279	3.2738e-16	1.82412e-14	UP
Rxra	ENSMUSG00000015846	20181	399	315	1944	1696	1848	791.036	1.58637	0.182319	8.7011	3.28671e-18	2.45047e-16	UP
Nrbp2	ENSMUSG00000075590	223649	491	394	2062	2105	1562	908.044	1.3426	0.180652	7.43197	1.06988e-13	4.1259e-12	UP
Adipor2	ENSMUSG00000030168	68465	291	288	1966	1600	2743	822.71	2.07603	0.204374	10.158	3.05303e-24	4.01691e-22	UP
Cenpb	ENSMUSG00000068267	12616	544	604	1583	1344	1660	909.544	0.625113	0.154753	4.03942	5.35833e-05	0.000384488	UP
Spcs3	ENSMUSG00000054408	76687	1050	857	1005	949	1116	1050.37	-0.669419	0.135281	-4.94834	7.48473e-07	8.41871e-06	DOWN
Rmnd5a	ENSMUSG00000002222	68477	417	336	1934	1599	2046	778.455	1.5307	0.15343	9.97653	1.9311e-23	2.29055e-21	UP
Il6st	ENSMUSG00000021756	16195	406	317	1561	1299	2138	753.763	1.43145	0.193553	7.39562	1.40749e-13	5.29738e-12	UP
Mlxip	ENSMUSG00000038342	208104	281	254	2409	1863	2696	780.729	2.33782	0.170994	13.672	1.49334e-42	8.65969e-40	UP
Uba5	ENSMUSG00000032557	66663	1102	1032	837	786	787	1003.28	-1.18713	0.130486	-9.09779	9.21848e-20	7.84423e-18	DOWN
Prrc2b	ENSMUSG00000039262	227723	514	439	1687	1487	1503	864.886	0.935905	0.138663	6.74949	1.4837e-11	4.06835e-10	UP
Ulk1	ENSMUSG00000029512	22241	304	331	1565	1528	2216	728.018	1.69229	0.236078	7.16834	7.59099e-13	2.52877e-11	UP
Bcl2l1	ENSMUSG00000007659	12048	95	77	1462	814	3755	553.576	3.76429	0.574358	6.55391	5.60485e-11	1.41085e-09	UP
Arfgef1	ENSMUSG00000067851	211673	471	402	1512	1339	1578	811.85	0.983273	0.138878	7.08014	1.44005e-12	4.62976e-11	UP
Brd2	ENSMUSG00000024335	14312	524	453	1472	1282	1603	814.191	0.796132	0.146628	5.42961	5.64771e-08	7.93772e-07	UP
Prr15l	ENSMUSG00000047040	217138	484	507	1571	1470	1610	849.718	0.861498	0.251879	3.42028	0.000625563	0.00334659	UP
Slc35f5	ENSMUSG00000026342	74150	414	413	1509	1276	1642	815.508	1.05199	0.18123	5.80472	6.44737e-09	1.10808e-07	UP
Ormdl3	ENSMUSG00000038150	66612	544	523	1324	1286	1731	823.469	0.659825	0.166378	3.96581	7.31464e-05	0.000505854	UP
Smim14	ENSMUSG00000037822	68552	1117	945	900	813	714	1044.42	-1.12251	0.149389	-7.51401	5.73443e-14	2.25588e-12	DOWN
Acacb	ENSMUSG00000042010	100705	570	518	1775	1608	1466	838.436	0.794588	0.243633	3.26142	0.00110857	0.005484	UP
Igfbp3	ENSMUSG00000020427	16009	149	150	1666	1395	2965	563.395	2.96179	0.290638	10.1906	2.18324e-24	2.94681e-22	UP
Tmem59	ENSMUSG00000028618	56374	963	985	840	881	765	988.439	-1.01273	0.140572	-7.2044	5.8299e-13	1.97146e-11	DOWN
Sdc1	ENSMUSG00000020592	20969	75	77	1526	790	3182	690.322	3.79647	0.520832	7.28925	3.11683e-13	1.11162e-11	UP
Fam174b	ENSMUSG00000078670	100038347	943	948	722	820	808	984.876	-1.04958	0.149443	-7.02326	2.16756e-12	6.74703e-11	DOWN
Srsf11	ENSMUSG00000055436	69207	962	957	881	877	828	914.974	-0.933938	0.127937	-7.29999	2.87785e-13	1.03583e-11	DOWN
Llgl2	ENSMUSG00000020782	217325	583	504	1589	1310	1436	789.071	0.634477	0.153949	4.12136	3.76647e-05	0.000280684	UP
Atg2a	ENSMUSG00000024773	329015	196	193	1499	1301	3044	639.893	2.53872	0.300337	8.4529	2.84146e-17	1.8537e-15	UP
Acadsb	ENSMUSG00000030861	66885	1039	827	1035	1122	783	944.016	-0.694075	0.18265	-3.80003	0.000144679	0.000923832	DOWN
Tead1	ENSMUSG00000055320	21676	221	180	1232	762	2296	478.595	2.05342	0.320815	6.40064	1.54724e-10	3.58891e-09	UP
Tardbp	ENSMUSG00000041459	230908	615	465	1563	1329	1315	883.098	0.607509	0.126882	4.78799	1.68462e-06	1.75723e-05	UP
Chga	ENSMUSG00000021194	12652	548	446	1597	1361	1452	773.554	0.791971	0.219803	3.6031	0.000314441	0.00183259	UP
Cpt1a	ENSMUSG00000024900	12894	394	414	1345	1282	1787	660.327	1.07955	0.267379	4.03755	5.40132e-05	0.000387396	UP
Atf6	ENSMUSG00000026663	226641	813	702	579	666	712	880.275	-0.986333	0.159717	-6.1755	6.59564e-10	1.36779e-08	DOWN
Gamt	ENSMUSG00000020150	14431	1846	1826	118	120	164	1175.6	-4.55747	0.192743	-23.6453	1.31851e-123	4.12877e-120	DOWN
Tmem259	ENSMUSG00000013858	216157	514	420	1407	1174	1445	787.044	0.749008	0.135708	5.51924	3.40461e-08	5.01467e-07	UP
Lrp10	ENSMUSG00000022175	65107	352	277	1411	1295	1526	737.933	1.39431	0.132693	10.5078	7.95553e-26	1.27102e-23	UP
Gjb1	ENSMUSG00000047797	14618	516	505	1461	1210	1592	863.81	0.694245	0.148269	4.68232	2.83651e-06	2.79844e-05	UP
Ppia	ENSMUSG00000071866	268373	1131	627	831	840	882	861.176	-0.796054	0.250561	-3.17708	0.00148766	0.0070604	DOWN
Inppl1	ENSMUSG00000032737	16332	555	523	1493	1499	1236	831.95	0.611033	0.152215	4.01429	5.96258e-05	0.000422426	UP
Slc35c2	ENSMUSG00000017664	228875	1045	991	842	815	796	906.736	-1.0939	0.149257	-7.32896	2.3195e-13	8.5615e-12	DOWN
Rac1	ENSMUSG00000001847	19353	547	342	1218	1014	1533	708.495	0.735739	0.186637	3.94209	8.07736e-05	0.000550816	UP
Wipi2	ENSMUSG00000029578	74781	394	343	1457	1239	1868	715.633	1.26824	0.171404	7.39916	1.37052e-13	5.17066e-12	UP
Ctnna1	ENSMUSG00000037815	12385	352	358	1392	1137	1759	681.109	1.22375	0.197097	6.20888	5.33632e-10	1.13212e-08	UP
Pcbd1	ENSMUSG00000020098	13180	913	885	756	733	707	919.744	-1.0752	0.148478	-7.24149	4.43792e-13	1.54068e-11	DOWN
Tsc22d1	ENSMUSG00000022010	21807	332	304	1677	1499	2207	701.631	1.71735	0.205245	8.36729	5.8956e-17	3.60576e-15	UP
Ei24	ENSMUSG00000062762	13663	316	282	1593	1242	1584	654.132	1.52159	0.145019	10.4923	9.36693e-26	1.48139e-23	UP
P2rx1	ENSMUSG00000020787	18436	1213	965	842	897	256	1013.73	-1.473	0.474959	-3.10133	0.00192651	0.00875824	DOWN
Col4a1	ENSMUSG00000031502	12826	378	341	1543	1074	1703	655.849	1.21943	0.217322	5.61115	2.00992e-08	3.14379e-07	UP
Copz2	ENSMUSG00000018672	56358	942	869	965	837	1002	864.936	-0.733198	0.143977	-5.09247	3.53431e-07	4.20491e-06	DOWN
Thbs1	ENSMUSG00000040152	21825	58	98	805	677	2921	410.547	3.41697	0.780109	4.38012	1.18616e-05	0.000101043	UP
Atp13a3	ENSMUSG00000022533	224088	474	401	1041	979	1355	661.998	0.588518	0.170149	3.45884	0.000542508	0.00296373	UP
Fkbp11	ENSMUSG00000003355	66120	1575	1630	327	444	437	962.042	-2.77004	0.232221	-11.9285	8.40989e-33	2.19456e-30	DOWN
Msrb1	ENSMUSG00000075705	27361	917	830	914	930	957	905.248	-0.678598	0.13009	-5.21639	1.82444e-07	2.30737e-06	DOWN
Vat1	ENSMUSG00000034993	26949	487	394	1169	921	1639	717.253	0.721032	0.20725	3.47904	0.000503213	0.00277814	UP
Cdk18	ENSMUSG00000026437	18557	524	455	1497	1397	1452	764	0.791274	0.162079	4.88203	1.05001e-06	1.15288e-05	UP
Sdf2l1	ENSMUSG00000022769	64136	823	867	542	487	800	757.066	-1.25804	0.225794	-5.57162	2.52383e-08	3.87029e-07	DOWN
Ccnl1	ENSMUSG00000027829	56706	187	151	984	741	1790	406.397	2.01604	0.301574	6.68508	2.30802e-11	6.14568e-10	UP
Anpep	ENSMUSG00000039062	16790	1113	1019	543	590	433	899.775	-1.80269	0.233161	-7.73153	1.06263e-14	4.64738e-13	DOWN
Mtus1	ENSMUSG00000045636	102103	447	408	1469	1470	1111	794.657	0.885159	0.198374	4.46207	8.1171e-06	7.2195e-05	UP
Srp9	ENSMUSG00000026511	27058	992	1013	675	651	700	903.222	-1.35201	0.157289	-8.59575	8.27233e-18	5.96866e-16	DOWN
Serinc1	ENSMUSG00000019877	56442	475	354	1363	1151	1553	725.35	0.939606	0.146594	6.40957	1.45933e-10	3.40518e-09	UP
Carhsp1	ENSMUSG00000008393	52502	479	379	1055	886	1744	639.968	0.743725	0.247858	3.00061	0.00269442	0.0116763	UP
Xpot	ENSMUSG00000034667	73192	735	724	700	727	635	872.928	-0.863715	0.151177	-5.71328	1.10816e-08	1.82829e-07	DOWN
Prpf4b	ENSMUSG00000021413	19134	783	798	956	899	724	879.439	-0.659998	0.16	-4.12498	3.70766e-05	0.000277225	DOWN
Ybx1	ENSMUSG00000028639	22608	1029	889	784	649	781	866.718	-1.15436	0.170608	-6.76617	1.32238e-11	3.63238e-10	DOWN
Tax1bp1	ENSMUSG00000004535	52440	341	317	1291	988	1373	706.291	1.10602	0.162404	6.81027	9.7416e-12	2.74324e-10	UP
Tmbim1	ENSMUSG00000006301	69660	418	313	1524	1308	1820	759.96	1.31487	0.155514	8.455	2.79093e-17	1.84007e-15	UP
Firre	ENSMUSG00000085396	103012	877	850	991	1022	751	862.908	-0.682891	0.171824	-3.97437	7.05671e-05	0.000490835	DOWN
Jund	ENSMUSG00000071076	16478	232	204	879	754	1471	431.047	1.46774	0.294926	4.97664	6.46984e-07	7.41026e-06	UP
Trappc9	ENSMUSG00000047921	76510	490	456	1391	1306	1454	702.121	0.770876	0.180253	4.27662	1.89748e-05	0.000153218	UP
Gabarapl1	ENSMUSG00000030161	57436	405	368	1349	1297	2102	739.458	1.25572	0.203981	6.15607	7.45719e-10	1.53225e-08	UP
Cyb561	ENSMUSG00000019590	13056	212	191	1668	1307	1872	664.371	2.22355	0.171608	12.9572	2.14014e-38	9.05624e-36	UP
Stt3b	ENSMUSG00000032437	68292	484	411	1195	1052	1226	673.663	0.596769	0.125164	4.76789	1.86168e-06	1.91765e-05	UP
Qsox2	ENSMUSG00000036327	227638	869	825	854	943	595	869.382	-0.860541	0.203891	-4.2206	2.43657e-05	0.000190462	DOWN
Cluh	ENSMUSG00000020741	74148	385	356	1582	1435	1408	745.279	1.21597	0.164494	7.39219	1.44425e-13	5.40972e-12	UP
Ifi27	ENSMUSG00000064215	52668	2474	1458	424	584	462	927.017	-2.74974	0.237479	-11.5789	5.2748e-31	1.19692e-28	DOWN
Fam193b	ENSMUSG00000021495	212483	895	757	873	940	905	862.948	-0.636881	0.12131	-5.25003	1.52076e-07	1.9453e-06	DOWN
Ube2h	ENSMUSG00000039159	22214	428	384	1196	1215	1224	664.936	0.803344	0.218267	3.68055	0.000232727	0.00140688	UP
Wnk2	ENSMUSG00000037989	75607	322	323	1874	1620	1384	716.214	1.55222	0.211958	7.32322	2.42093e-13	8.85619e-12	UP
Itga6	ENSMUSG00000027111	16403	412	318	1159	725	1511	627.484	0.855457	0.275701	3.10284	0.00191675	0.00872145	UP
Tbc1d15	ENSMUSG00000020130	66687	424	323	1034	1035	1294	683.381	0.817697	0.156344	5.23012	1.69398e-07	2.15107e-06	UP
Cox6a1	ENSMUSG00000041697	12861	916	832	823	726	889	816.954	-0.882963	0.151686	-5.82101	5.84923e-09	1.01419e-07	DOWN
Rhbdf1	ENSMUSG00000020282	13650	407	316	1051	909	1246	617.736	0.792713	0.224966	3.5237	0.000425566	0.00239679	UP
Ywhag	ENSMUSG00000051391	22628	260	212	1151	847	2749	618.833	1.96604	0.3395	5.79098	6.99771e-09	1.1935e-07	UP
Sat1	ENSMUSG00000025283	20229	243	228	1369	956	1683	604.689	1.71963	0.213301	8.06198	7.50655e-16	3.98407e-14	UP
Tmem184a	ENSMUSG00000036687	231832	799	903	881	752	995	795.975	-0.748733	0.202265	-3.70175	0.000214118	0.00130642	DOWN
Socs3	ENSMUSG00000053113	12702	50	33	783	564	2442	442.696	4.15817	0.899926	4.62057	3.82695e-06	3.65804e-05	UP
Ldha	ENSMUSG00000063229	16828	244	224	1124	790	1272	591.552	1.39916	0.211918	6.60239	4.04593e-11	1.04189e-09	UP
Vdac2	ENSMUSG00000021771	22334	749	715	763	659	829	778.697	-0.745087	0.146291	-5.09317	3.52122e-07	4.19572e-06	DOWN
Uqcrq	ENSMUSG00000044894	22272	937	952	794	591	882	778.786	-1.10952	0.225973	-4.90997	9.10883e-07	1.00932e-05	DOWN
Smox	ENSMUSG00000027333	228608	277	236	1082	777	1698	616.605	1.42835	0.293906	4.85987	1.17465e-06	1.27189e-05	UP
Ubtf	ENSMUSG00000020923	21429	497	446	1228	967	1546	717.391	0.622819	0.186563	3.33838	0.00084268	0.00433437	UP
Clint1	ENSMUSG00000006169	216705	356	352	1219	1055	1343	623.551	0.986029	0.156096	6.31682	2.67002e-10	5.97207e-09	UP
Trim25	ENSMUSG00000000275	217069	440	373	1177	1238	1411	663.595	0.878192	0.192157	4.57017	4.87325e-06	4.5444e-05	UP
Ptp4a2	ENSMUSG00000028788	19244	713	566	741	677	699	788.008	-0.628304	0.121369	-5.17682	2.25698e-07	2.79569e-06	DOWN
Smarcd2	ENSMUSG00000078619	83796	412	383	1508	1309	1662	703.821	1.13011	0.140195	8.06104	7.56463e-16	3.98786e-14	UP
Tpm4	ENSMUSG00000031799	326618	147	163	1235	959	2038	560.159	2.39414	0.289526	8.26918	1.34883e-16	7.99951e-15	UP
Idh2	ENSMUSG00000030541	269951	1028	906	651	654	629	835.215	-1.35834	0.137896	-9.85043	6.82511e-23	7.63202e-21	DOWN
Msl1	ENSMUSG00000052915	74026	414	400	1242	1063	1544	659.358	0.87442	0.167431	5.22257	1.76459e-07	2.23528e-06	UP
Spcs2	ENSMUSG00000035227	66624	920	851	671	640	688	848.571	-1.1873	0.136512	-8.69736	3.39708e-18	2.52077e-16	DOWN
2900097C17Rik	ENSMUSG00000102869	347740	822	810	821	743	952	790.654	-0.742479	0.166641	-4.45555	8.36785e-06	7.41877e-05	DOWN
Sfpq	ENSMUSG00000028820	71514	385	297	1224	844	1360	629.987	0.969455	0.188425	5.14506	2.67442e-07	3.25862e-06	UP
Dnm2	ENSMUSG00000033335	13430	282	247	1376	1080	1925	626.237	1.68536	0.211441	7.97083	1.57617e-15	7.90963e-14	UP
Zfp106	ENSMUSG00000027288	20402	737	699	773	732	824	772.327	-0.665941	0.157415	-4.23046	2.3321e-05	0.000183486	DOWN
Mindy1	ENSMUSG00000038712	75007	444	498	1179	1140	1341	705.813	0.586311	0.186923	3.13665	0.00170891	0.00794196	UP
Aldh6a1	ENSMUSG00000021238	104776	997	826	719	743	681	835.75	-1.121	0.182825	-6.13152	8.70418e-10	1.75847e-08	DOWN
Cxxc5	ENSMUSG00000046668	67393	379	356	1234	1030	1737	674.405	1.07772	0.194221	5.54896	2.87373e-08	4.34402e-07	UP
Ndst1	ENSMUSG00000054008	15531	310	363	1052	853	1619	607.823	1.00958	0.23366	4.32073	1.55516e-05	0.000128356	UP
Dctn1	ENSMUSG00000031865	13191	410	391	1257	1177	1399	679.181	0.894794	0.150555	5.9433	2.79344e-09	5.07978e-08	UP
Nrp1	ENSMUSG00000025810	18186	295	190	714	736	981	672.912	0.980016	0.189483	5.17206	2.31529e-07	2.86339e-06	UP
Ppp1cc	ENSMUSG00000004455	19047	328	335	1476	1160	1461	635.484	1.25737	0.167567	7.50369	6.20455e-14	2.42256e-12	UP
Ppp1ccb	ENSMUSG00000004455	434233	328	335	1476	1160	1461	635.484	1.25737	0.167567	7.50369	6.20455e-14	2.42256e-12	UP
Ech1	ENSMUSG00000053898	51798	387	321	1341	1165	858	723.768	0.891653	0.237768	3.75009	0.00017677	0.0011031	UP
Nckap1	ENSMUSG00000027002	50884	386	324	1099	939	1241	649.517	0.847409	0.149072	5.68458	1.31137e-08	2.13821e-07	UP
Arih1	ENSMUSG00000025234	23806	361	314	1268	1086	1260	662.247	1.05963	0.163767	6.47034	9.77826e-11	2.33026e-09	UP
Foxo3	ENSMUSG00000048756	56484	232	213	1311	1104	1644	516.716	1.82459	0.181834	10.0344	1.07592e-23	1.31607e-21	UP
Agap3	ENSMUSG00000023353	213990	427	386	1149	1056	1316	646.121	0.752866	0.1378	5.46346	4.6693e-08	6.71941e-07	UP
Btg1	ENSMUSG00000036478	12226	324	301	1119	852	1559	552.433	1.12958	0.249872	4.52062	6.1658e-06	5.6192e-05	UP
Tnpo1	ENSMUSG00000009470	238799	375	364	1003	958	1245	603.359	0.752391	0.15806	4.76015	1.93448e-06	1.97962e-05	UP
Sec61b	ENSMUSG00000053317	66212	980	969	565	548	541	818.492	-1.60164	0.147904	-10.8289	2.51194e-27	4.35515e-25	DOWN
Clip1	ENSMUSG00000049550	56430	385	395	1149	1178	1084	629.497	0.764311	0.150491	5.07879	3.79839e-07	4.5054e-06	UP
Hsp90aa1	ENSMUSG00000021270	15519	334	281	826	715	1112	568.3	0.748417	0.244173	3.06511	0.00217593	0.00971998	UP
Rhoq	ENSMUSG00000024143	104215	451	414	1399	1205	1692	726.634	0.947972	0.155953	6.07857	1.21255e-09	2.38804e-08	UP
Ccng1	ENSMUSG00000020326	12450	337	296	1145	927	1471	676.025	1.12089	0.224323	4.99678	5.8296e-07	6.71133e-06	UP
Gas2l1	ENSMUSG00000034201	78926	176	144	1641	1510	1939	642.534	2.63351	0.159937	16.466	6.44291e-61	6.30479e-58	UP
Cope	ENSMUSG00000055681	59042	859	828	697	611	750	783.542	-1.07932	0.160416	-6.72825	1.71721e-11	4.65967e-10	DOWN
Epcam	ENSMUSG00000045394	17075	221	183	1230	868	1582	533.465	1.82371	0.233206	7.82016	5.27579e-15	2.39429e-13	UP
Pah	ENSMUSG00000020051	18478	807	720	480	559	615	770.074	-1.24205	0.177975	-6.97875	2.97818e-12	9.08956e-11	DOWN
Scarb2	ENSMUSG00000029426	12492	417	306	915	918	992	565.561	0.615728	0.158197	3.89215	9.9358e-05	0.00066226	UP
Hnrnpab	ENSMUSG00000020358	15384	388	370	1100	806	1196	670.699	0.663978	0.184771	3.59351	0.000326253	0.00189331	UP
Picalm	ENSMUSG00000039361	233489	489	342	1129	878	1428	625.459	0.694121	0.199265	3.4834	0.000495081	0.00273904	UP
Krtcap2	ENSMUSG00000042747	66059	748	771	843	743	905	740.094	-0.655856	0.171275	-3.82926	0.000128531	0.000834334	DOWN
Ube2z	ENSMUSG00000014349	268470	300	318	1189	1052	1727	638.371	1.31095	0.214342	6.11614	9.58677e-10	1.91515e-08	UP
Zfp36	ENSMUSG00000044786	22695	58	54	593	565	1631	289.439	3.27035	0.718644	4.55073	5.34607e-06	4.91217e-05	UP
Tbrg1	ENSMUSG00000011114	21376	343	263	1134	858	1407	570.849	1.12932	0.2043	5.52776	3.24337e-08	4.81341e-07	UP
Maged1	ENSMUSG00000025151	94275	1128	933	478	454	467	823.544	-1.91523	0.163743	-11.6965	1.32763e-31	3.10249e-29	DOWN
Arhgef12	ENSMUSG00000059495	69632	358	312	1020	934	1261	609.156	0.901897	0.171193	5.26831	1.37687e-07	1.77868e-06	UP
Tnfrsf1a	ENSMUSG00000030341	21937	196	174	1093	844	1756	518.651	1.95309	0.272009	7.18023	6.95963e-13	2.33169e-11	UP
Anp32a	ENSMUSG00000032249	11737	344	322	944	873	1470	598.724	0.938003	0.204624	4.58403	4.56099e-06	4.28126e-05	UP
Sft2d2	ENSMUSG00000040848	108735	392	347	1174	877	1772	598.194	1.00471	0.23251	4.32116	1.55214e-05	0.000128242	UP
Nrd1	ENSMUSG00000053510	230598	773	801	673	663	738	763.225	-0.969266	0.142793	-6.7879	1.1378e-11	3.18117e-10	DOWN
Gtpbp2	ENSMUSG00000023952	56055	401	328	1089	968	1639	577.683	0.982838	0.248077	3.96182	7.43805e-05	0.000513482	UP
Ppm1a	ENSMUSG00000021096	19042	347	329	1305	1043	1228	624.101	1.03692	0.178912	5.79572	6.80279e-09	1.16406e-07	UP
Cyb5b	ENSMUSG00000031924	66427	723	647	606	580	495	846.502	-1.06421	0.169242	-6.28809	3.21404e-10	7.10766e-09	DOWN
Acadl	ENSMUSG00000026003	11363	233	204	1358	1107	1083	637.346	1.65992	0.15558	10.6692	1.41858e-26	2.33796e-24	UP
Tmed11	ENSMUSG00000004821	67366	788	653	733	839	671	772.933	-0.713426	0.195444	-3.65028	0.000261956	0.00156364	DOWN
Agrn	ENSMUSG00000041936	11603	783	676	828	773	806	724.652	-0.636538	0.118497	-5.37175	7.79753e-08	1.06162e-06	DOWN
Git1	ENSMUSG00000011877	216963	402	305	1004	887	1235	556.685	0.789566	0.172655	4.57308	4.80606e-06	4.48466e-05	UP
Zmiz1	ENSMUSG00000007817	328365	223	220	1153	1002	2010	531.743	1.8633	0.269941	6.90261	5.10541e-12	1.49133e-10	UP
Csnk1d	ENSMUSG00000025162	104318	284	279	1312	1137	1307	606.76	1.37202	0.160292	8.55949	1.13368e-17	7.99114e-16	UP
Tgoln1	ENSMUSG00000056429	22134	374	280	912	683	1427	593.069	0.850209	0.260488	3.26391	0.00109885	0.0054428	UP
Farp1	ENSMUSG00000025555	223254	231	188	1068	703	1832	458.919	1.73949	0.288369	6.03216	1.61782e-09	3.11949e-08	UP
Hip1r	ENSMUSG00000000915	29816	403	334	880	845	1176	608.225	0.61902	0.167043	3.70575	0.000210769	0.00128856	UP
Sdf4	ENSMUSG00000029076	20318	710	716	803	680	802	711.403	-0.687867	0.127302	-5.40343	6.53802e-08	9.0509e-07	DOWN
Nectin2	ENSMUSG00000062300	19294	207	218	983	984	927	450.043	1.4008	0.259301	5.40222	6.58213e-08	9.10392e-07	UP
Ypel3	ENSMUSG00000042675	66090	415	388	1134	1210	1187	652.534	0.776791	0.149932	5.18096	2.20743e-07	2.74308e-06	UP
Ddost	ENSMUSG00000028757	13200	828	773	583	560	642	765.677	-1.20587	0.184523	-6.53503	6.3596e-11	1.58302e-09	DOWN
Sympk	ENSMUSG00000023118	68188	429	338	1121	1040	1375	623.381	0.848962	0.150475	5.64188	1.68208e-08	2.68738e-07	UP
Psmd8	ENSMUSG00000030591	57296	324	291	1043	856	1486	557.836	1.09547	0.216129	5.06861	4.00736e-07	4.72109e-06	UP
Ywhaz	ENSMUSG00000022285	22631	284	237	896	760	1344	567.077	1.16455	0.225336	5.16805	2.3655e-07	2.92317e-06	UP
Ufm1	ENSMUSG00000027746	67890	715	704	749	676	669	761.151	-0.804427	0.170927	-4.70627	2.52296e-06	2.51765e-05	DOWN
Dgkz	ENSMUSG00000040479	104418	361	266	1087	1094	1122	615.106	1.04627	0.14117	7.41137	1.25001e-13	4.7619e-12	UP
Nphs1	ENSMUSG00000006649	54631	1364	1093	311	415	338	820.612	-2.5557	0.168773	-15.1428	8.44921e-52	6.96259e-49	DOWN
Clcn3	ENSMUSG00000004319	12725	406	323	1222	912	1334	600.586	0.890086	0.163345	5.44911	5.06216e-08	7.19222e-07	UP
Uso1	ENSMUSG00000029407	56041	624	578	643	616	646	700.531	-0.697467	0.153564	-4.54187	5.5758e-06	5.11426e-05	DOWN
Myo1c	ENSMUSG00000017774	17913	321	238	1170	967	1307	557.249	1.26778	0.15845	8.0011	1.23309e-15	6.30929e-14	UP
Klhl24	ENSMUSG00000062901	75785	341	382	1383	1159	1275	621.474	1.02647	0.218098	4.70646	2.5205e-06	2.51681e-05	UP
Ifitm3	ENSMUSG00000025492	66141	972	495	664	668	525	622.757	-0.988978	0.240315	-4.11534	3.86602e-05	0.000286738	DOWN
Fndc3b	ENSMUSG00000039286	72007	263	230	969	723	1328	532.187	1.24961	0.218474	5.71974	1.06685e-08	1.76759e-07	UP
Eif2s2	ENSMUSG00000074656	67204	694	610	592	670	739	693.215	-0.739188	0.154172	-4.79457	1.63028e-06	1.70168e-05	DOWN
Lpl	ENSMUSG00000015568	16956	946	879	481	582	342	788.04	-1.73256	0.228324	-7.58819	3.24416e-14	1.32621e-12	DOWN
Midn	ENSMUSG00000035621	59090	293	248	584	488	1503	401.1	0.886433	0.353146	2.5101	0.0120696	0.0407535	UP
Zfp598	ENSMUSG00000041130	213753	426	303	990	970	1089	623.93	0.714521	0.150007	4.76326	1.9049e-06	1.95506e-05	UP
Cab39	ENSMUSG00000036707	12283	387	342	991	837	1121	607.673	0.653796	0.150665	4.33941	1.42866e-05	0.000118981	UP
Ptbp3	ENSMUSG00000028382	230257	322	247	1040	950	1234	534.103	1.14769	0.191386	5.99672	2.01337e-09	3.78431e-08	UP
Slc19a2	ENSMUSG00000040918	116914	209	266	1190	749	1086	370.723	1.28468	0.27934	4.59897	4.24591e-06	4.01196e-05	UP
Srp72	ENSMUSG00000036323	66661	790	645	702	708	710	725.298	-0.7918	0.128193	-6.17662	6.54877e-10	1.35987e-08	DOWN
Plbd2	ENSMUSG00000029598	71772	310	336	1223	1227	1185	608.042	1.12553	0.146672	7.67377	1.67019e-14	7.10604e-13	UP
Zfand6	ENSMUSG00000030629	65098	352	294	1290	1145	1335	603.582	1.18635	0.165937	7.14941	8.71513e-13	2.86666e-11	UP
Rcc2	ENSMUSG00000040945	108911	700	669	716	606	672	730.062	-0.823202	0.162737	-5.05849	4.2259e-07	4.94876e-06	DOWN
Ppp2ca	ENSMUSG00000020349	19052	325	286	1139	980	1246	588.798	1.09964	0.150413	7.31079	2.65577e-13	9.64764e-12	UP
Hadha	ENSMUSG00000025745	97212	384	340	1015	1066	724	659.35	0.5981	0.225984	2.64665	0.00812945	0.0293481	UP
Cry2	ENSMUSG00000068742	12953	158	240	632	433	762	243.738	0.805533	0.272584	2.95517	0.00312498	0.0132273	UP
Hgfac	ENSMUSG00000029102	54426	934	952	512	535	666	718.549	-1.50536	0.179404	-8.3909	4.82438e-17	2.97383e-15	DOWN
Fam129b	ENSMUSG00000026796	227737	264	297	1381	1087	1114	580.536	1.30099	0.179441	7.25021	4.16114e-13	1.4478e-11	UP
Ski	ENSMUSG00000029050	20481	282	225	1399	1153	1776	574.672	1.7347	0.189507	9.15375	5.49907e-20	4.75685e-18	UP
Arf5	ENSMUSG00000020440	11844	398	366	1015	845	1121	588.278	0.599658	0.156361	3.83509	0.000125516	0.000816795	UP
Ghr	ENSMUSG00000055737	14600	694	588	536	531	328	763.038	-1.23267	0.222312	-5.54479	2.94303e-08	4.43068e-07	DOWN
Prpsap1	ENSMUSG00000015869	67763	833	769	563	660	343	755.638	-1.38764	0.229941	-6.03478	1.59176e-09	3.07682e-08	DOWN
Kpnb1	ENSMUSG00000001440	16211	375	377	1079	825	1204	613.041	0.676587	0.174829	3.86999	0.000108839	0.000718417	UP
Map4k4	ENSMUSG00000026074	26921	225	213	1206	789	1623	485.404	1.67482	0.232371	7.20753	5.69775e-13	1.93094e-11	UP
Fkbp4	ENSMUSG00000030357	14228	670	588	564	610	459	730.75	-0.979265	0.172271	-5.68444	1.3124e-08	2.13821e-07	DOWN
Ralbp1	ENSMUSG00000024096	19765	370	317	1125	1006	1224	601.648	0.928157	0.136278	6.81077	9.70796e-12	2.73869e-10	UP
Psmb10	ENSMUSG00000031897	19171	1031	1123	363	416	435	755.149	-2.19513	0.183016	-11.9941	3.81331e-33	1.04746e-30	DOWN
Atp1b3	ENSMUSG00000032412	11933	228	246	686	554	1160	618.737	0.964337	0.336026	2.86983	0.00410694	0.0166457	UP
Sh3glb1	ENSMUSG00000037062	54673	368	292	1108	1149	996	622.498	0.948899	0.158931	5.9705	2.36524e-09	4.38256e-08	UP
Scap	ENSMUSG00000032485	235623	424	361	1152	895	1101	600.97	0.641814	0.15801	4.06186	4.86823e-05	0.000354191	UP
Bsdc1	ENSMUSG00000040859	100383	215	223	997	826	1673	503.469	1.62399	0.263447	6.16437	7.07628e-10	1.46165e-08	UP
Tmem8	ENSMUSG00000024180	60455	727	649	717	743	793	684.868	-0.647501	0.134162	-4.82625	1.39129e-06	1.48388e-05	DOWN
Plpp5	ENSMUSG00000031570	71910	757	655	743	655	637	738.573	-0.832278	0.13979	-5.95377	2.62027e-09	4.79832e-08	DOWN
Srsf1	ENSMUSG00000018379	110809	406	341	1126	1236	833	644.162	0.744241	0.185803	4.00555	6.18733e-05	0.000436768	UP
Gstm1	ENSMUSG00000058135	14862	900	674	827	658	654	722.895	-0.911765	0.150397	-6.06237	1.34128e-09	2.62834e-08	DOWN
Ranbp2	ENSMUSG00000003226	19386	332	294	837	760	1017	550.435	0.700588	0.164573	4.25701	2.07181e-05	0.000165165	UP
Ankrd24	ENSMUSG00000054708	70615	831	806	600	659	510	721.181	-1.24876	0.185214	-6.74222	1.55983e-11	4.25476e-10	DOWN
AU040320	ENSMUSG00000028830	100317	332	294	1095	958	1242	608.181	1.03425	0.148081	6.98434	2.86205e-12	8.76929e-11	UP
Foxred2	ENSMUSG00000016552	239554	256	195	1294	1158	1138	577.448	1.63877	0.170334	9.62091	6.5254e-22	6.67766e-20	UP
Rhobtb1	ENSMUSG00000019944	69288	120	78	1264	573	2058	391.352	2.93874	0.371892	7.90214	2.74159e-15	1.29683e-13	UP
Foxp4	ENSMUSG00000023991	74123	228	189	1088	910	1408	517.601	1.66948	0.194393	8.58815	8.83831e-18	6.31879e-16	UP
Selenos	ENSMUSG00000075701	109815	950	832	451	401	497	730.297	-1.76245	0.130937	-13.4603	2.68006e-41	1.39872e-38	DOWN
Slc25a35	ENSMUSG00000018740	71998	653	454	384	465	146	716.624	-1.49026	0.501882	-2.96935	0.00298428	0.0127246	DOWN
Creld2	ENSMUSG00000023272	76737	688	689	343	378	406	618.798	-1.65302	0.178392	-9.26623	1.92845e-20	1.71555e-18	DOWN
Dhx15	ENSMUSG00000029169	13204	347	318	854	767	1035	521.151	0.63471	0.15582	4.07335	4.63412e-05	0.000339049	UP
Hdac5	ENSMUSG00000008855	15184	370	307	951	945	1137	612.787	0.806931	0.173892	4.64042	3.47704e-06	3.36049e-05	UP
Egln2	ENSMUSG00000058709	112406	342	288	1022	967	1025	586.598	0.90071	0.147172	6.12013	9.35009e-10	1.87639e-08	UP
Ibtk	ENSMUSG00000035941	108837	300	293	1379	874	2003	569.602	1.4692	0.285748	5.14158	2.72438e-07	3.31692e-06	UP
Rpn1	ENSMUSG00000030062	103963	633	548	527	457	558	662.177	-0.975902	0.156298	-6.24384	4.26947e-10	9.23302e-09	DOWN
Adgra3	ENSMUSG00000029090	70693	339	304	1018	1068	1160	600.242	0.977022	0.174815	5.5889	2.28517e-08	3.54597e-07	UP
Il22ra1	ENSMUSG00000037157	230828	173	149	1632	1383	1610	543.757	2.4835	0.225717	11.0027	3.70753e-28	6.91056e-26	UP
Kdm5c	ENSMUSG00000025332	20591	243	306	990	861	1146	562.672	1.07031	0.189351	5.65255	1.58088e-08	2.53866e-07	UP
Yy1	ENSMUSG00000021264	22632	365	230	1072	956	1037	594.124	1.01894	0.166775	6.10965	9.98492e-10	1.98393e-08	UP
Mdh1	ENSMUSG00000020321	17449	721	694	510	445	569	663.782	-1.25901	0.15729	-8.00437	1.2008e-15	6.18451e-14	DOWN
Hipk3	ENSMUSG00000027177	15259	347	267	835	720	832	526.703	0.603524	0.169366	3.56343	0.000366045	0.00209626	UP
Dazap2	ENSMUSG00000000346	23994	379	334	979	765	1121	551.006	0.642597	0.168499	3.81366	0.000136924	0.000881867	UP
Serpinb6a	ENSMUSG00000060147	20719	335	264	1042	882	1102	553.89	0.97962	0.160295	6.11134	9.87966e-10	1.97052e-08	UP
Ppfia1	ENSMUSG00000037519	233977	302	263	961	859	860	536.74	0.886232	0.157759	5.61764	1.93585e-08	3.04008e-07	UP
Cnpy2	ENSMUSG00000025381	56530	688	686	735	650	617	656.844	-0.823179	0.13875	-5.93282	2.9778e-09	5.38377e-08	DOWN
Actr1b	ENSMUSG00000037351	226977	369	319	958	757	1109	562.178	0.674374	0.166326	4.05452	5.02365e-05	0.000364145	UP
Cxadr	ENSMUSG00000022865	13052	209	193	855	786	1296	436.527	1.50475	0.225366	6.67691	2.44028e-11	6.47584e-10	UP
Ncln	ENSMUSG00000020238	103425	283	273	1067	998	1059	550.082	1.12729	0.133353	8.4534	2.82941e-17	1.85356e-15	UP
Sord	ENSMUSG00000027227	20322	661	563	369	468	460	654.637	-1.26948	0.186337	-6.81283	9.57004e-12	2.70955e-10	DOWN
Tln1	ENSMUSG00000028465	21894	365	278	884	743	1146	523.804	0.752233	0.182406	4.12395	3.72427e-05	0.000278068	UP
Igf1	ENSMUSG00000020053	16000	630	558	561	772	544	646.745	-0.691376	0.204	-3.38911	0.000701208	0.00369284	DOWN
Wasf2	ENSMUSG00000028868	242687	235	229	850	659	1424	432.933	1.28942	0.255462	5.04743	4.47799e-07	5.23223e-06	UP
Flot1	ENSMUSG00000059714	14251	184	132	994	838	1439	511.052	2.01741	0.240402	8.39183	4.78639e-17	2.96208e-15	UP
Ocln	ENSMUSG00000021638	18260	160	122	788	734	1416	359.309	2.02496	0.273101	7.41471	1.21894e-13	4.65905e-12	UP
F11r	ENSMUSG00000038235	16456	189	163	964	805	1520	444.077	1.86084	0.236926	7.85411	4.02612e-15	1.84318e-13	UP
Grpel1	ENSMUSG00000029198	17713	291	252	1010	781	1269	527.396	1.13075	0.188545	5.99725	2.00688e-09	3.77664e-08	UP
Arpc1b	ENSMUSG00000029622	11867	388	226	779	682	1013	511.334	0.66839	0.244695	2.73153	0.00630413	0.023853	UP
Lzts2	ENSMUSG00000035342	226154	276	240	1100	886	1365	493.736	1.33594	0.208787	6.39859	1.56815e-10	3.63203e-09	UP
Klk1b11	ENSMUSG00000044485	16613	197	257	1387	1132	1318	507.56	1.69831	0.220184	7.71315	1.22753e-14	5.33873e-13	UP
Desi1	ENSMUSG00000022472	28075	228	272	1355	1011	1388	534.768	1.53063	0.177586	8.61909	6.7489e-18	4.89201e-16	UP
Cic	ENSMUSG00000005442	71722	369	292	760	674	1138	483.629	0.602619	0.218624	2.75642	0.0058438	0.0223434	UP
Smoc1	ENSMUSG00000021136	64075	166	162	985	879	1910	497.626	2.15541	0.27376	7.87334	3.45304e-15	1.5987e-13	UP
Txndc5	ENSMUSG00000038991	105245	646	495	535	588	469	654.261	-0.86838	0.174967	-4.96312	6.93685e-07	7.86897e-06	DOWN
Aff1	ENSMUSG00000029313	17355	394	226	886	674	1073	535.837	0.742673	0.256267	2.89804	0.00375502	0.0154473	UP
Lemd2	ENSMUSG00000044857	224640	273	249	1107	933	1103	544.125	1.22653	0.182756	6.7113	1.92902e-11	5.1934e-10	UP
Prxl2c	ENSMUSG00000021482	66129	151	125	1246	1038	1763	518.085	2.51326	0.29752	8.44737	2.97932e-17	1.93557e-15	UP
Myo1d	ENSMUSG00000035441	338367	257	245	908	805	1263	493.735	1.20149	0.20753	5.78947	7.06093e-09	1.20166e-07	UP
Ubc	ENSMUSG00000008348	22190	211	233	819	608	1711	461.244	1.44206	0.342638	4.20871	2.56829e-05	0.000199562	UP
Cox7c	ENSMUSG00000017778	12867	580	685	579	550	660	600.797	-0.874886	0.17591	-4.97348	6.57609e-07	7.52095e-06	DOWN
Mars	ENSMUSG00000040354	216443	597	548	629	527	779	600.061	-0.60791	0.162662	-3.73726	0.000186034	0.00115356	DOWN
Calcoco1	ENSMUSG00000023055	67488	413	319	1100	1076	1020	524.897	0.774316	0.205641	3.76537	0.000166299	0.00104568	UP
Adam10	ENSMUSG00000054693	11487	302	310	820	641	1172	495.788	0.732719	0.214633	3.41383	0.00064056	0.00341596	UP
Entpd1	ENSMUSG00000048120	12495	641	466	561	669	439	641.33	-0.750964	0.219475	-3.42164	0.000622447	0.00333185	DOWN
Pqlc1	ENSMUSG00000034006	66943	318	226	738	636	942	499.577	0.737642	0.22208	3.32151	0.000895302	0.00456753	UP
Nars	ENSMUSG00000024587	70223	604	568	440	369	505	631.476	-1.20105	0.209819	-5.72424	1.03897e-08	1.72504e-07	DOWN
Ceacam1	ENSMUSG00000074272	26365	165	169	1089	635	1828	485.3	2.03279	0.312748	6.49976	8.04468e-11	1.96498e-09	UP
Upf1	ENSMUSG00000058301	19704	271	280	1129	832	1312	524.334	1.19806	0.183355	6.53412	6.39855e-11	1.59019e-09	UP
Ndufa6	ENSMUSG00000022450	67130	580	677	622	520	667	598.568	-0.851165	0.166425	-5.11442	3.14714e-07	3.78455e-06	DOWN
Hook1	ENSMUSG00000028572	77963	774	558	561	509	538	657.35	-1.07907	0.139914	-7.71239	1.23481e-14	5.34393e-13	DOWN
Fxr2	ENSMUSG00000018765	23879	277	232	1076	897	944	498.943	1.15928	0.149312	7.76416	8.21893e-15	3.63514e-13	UP
Otud5	ENSMUSG00000031154	54644	359	262	1022	929	1092	534.827	0.940461	0.161604	5.81954	5.90088e-09	1.02201e-07	UP
Plpp3	ENSMUSG00000028517	67916	676	624	934	724	504	602.153	-0.63059	0.232857	-2.70805	0.00676798	0.0253024	DOWN
Rgs11	ENSMUSG00000024186	50782	1175	1064	466	495	427	687.278	-2.04821	0.170877	-11.9865	4.18278e-33	1.11e-30	DOWN
Eif3j1	ENSMUSG00000027236	78655	252	291	852	743	880	516.087	0.815061	0.175555	4.64276	3.43788e-06	3.32675e-05	UP
Bag6	ENSMUSG00000024392	224727	355	284	868	732	1056	533.688	0.697019	0.165011	4.22406	2.39938e-05	0.00018793	UP
Atf5	ENSMUSG00000038539	107503	646	540	725	612	529	689.876	-0.704332	0.272395	-2.58571	0.009718	0.0341001	DOWN
Tbc1d8	ENSMUSG00000003134	54610	292	222	1115	919	1130	447.565	1.26612	0.192813	6.56656	5.14906e-11	1.30875e-09	UP
B4galt1	ENSMUSG00000028413	14595	238	221	808	682	1424	446.982	1.29904	0.343787	3.77861	0.000157706	0.000996854	UP
Esyt2	ENSMUSG00000021171	52635	224	274	783	647	1227	441.089	1.03499	0.253927	4.07595	4.58266e-05	0.00033544	UP
Hnrnpf	ENSMUSG00000042079	98758	286	264	887	718	983	521.394	0.869491	0.152173	5.71382	1.10471e-08	1.82451e-07	UP
Mark2	ENSMUSG00000024969	13728	271	263	872	980	941	487.085	1.0266	0.167797	6.11807	9.4713e-10	1.89632e-08	UP
Micall1	ENSMUSG00000033039	27008	240	168	1196	835	1630	475.899	1.81002	0.298982	6.05396	1.41328e-09	2.75906e-08	UP
Nup210	ENSMUSG00000030091	54563	325	275	974	776	968	463.722	0.818284	0.179316	4.56336	5.03425e-06	4.65847e-05	UP
Pdgfa	ENSMUSG00000025856	18590	165	183	1004	1122	1177	454.901	1.87994	0.210812	8.9176	4.76491e-19	3.80634e-17	UP
Mllt6	ENSMUSG00000038437	246198	238	237	941	958	1384	482.027	1.42342	0.201783	7.05423	1.73563e-12	5.50293e-11	UP
Mapk14	ENSMUSG00000053436	26416	273	243	954	837	1393	496.282	1.26202	0.215032	5.86897	4.38512e-09	7.73174e-08	UP
Plk2	ENSMUSG00000021701	20620	867	903	305	321	270	696.323	-2.34802	0.289434	-8.11243	4.96172e-16	2.66961e-14	DOWN
Acvr1b	ENSMUSG00000000532	11479	218	199	998	804	1702	431.796	1.7039	0.265888	6.40836	1.47092e-10	3.42712e-09	UP
Cnppd1	ENSMUSG00000033159	69171	328	258	1010	869	1297	509.877	1.08093	0.200506	5.39103	7.00541e-08	9.62982e-07	UP
Sod1	ENSMUSG00000022982	20655	600	537	595	573	735	573.618	-0.617956	0.161348	-3.82996	0.000128164	0.000832295	DOWN
Fkbp1a	ENSMUSG00000032966	14225	256	224	885	764	1133	482.693	1.17278	0.208463	5.62585	1.84601e-08	2.91361e-07	UP
Arpc5	ENSMUSG00000008475	67771	322	362	883	800	1003	545.804	0.601489	0.160262	3.75317	0.000174611	0.00109137	UP
Mical2	ENSMUSG00000038244	320878	215	209	996	789	1423	508.024	1.55018	0.230685	6.71989	1.81863e-11	4.90937e-10	UP
Micalcl	ENSMUSG00000038244	100504195	215	209	996	789	1423	508.024	1.55018	0.230685	6.71989	1.81863e-11	4.90937e-10	UP
Crk	ENSMUSG00000017776	12928	339	267	969	833	925	567.538	0.813109	0.129506	6.27856	3.41733e-10	7.50424e-09	UP
Grk2	ENSMUSG00000024858	110355	266	245	925	807	933	478.259	1.01994	0.147332	6.92275	4.42958e-12	1.31104e-10	UP
Gfpt1	ENSMUSG00000029992	14583	669	581	455	410	405	595.381	-1.33658	0.19599	-6.81961	9.12884e-12	2.60347e-10	DOWN
Orai2	ENSMUSG00000039747	269717	554	536	568	698	459	640.367	-0.695141	0.266353	-2.60985	0.00905829	0.0322038	DOWN
Klhdc10	ENSMUSG00000029775	76788	618	584	579	581	499	608.347	-0.896246	0.138245	-6.48304	8.98937e-11	2.16201e-09	DOWN
Paip2	ENSMUSG00000037058	67869	327	239	929	757	962	521.168	0.87112	0.149717	5.81845	5.93974e-09	1.02761e-07	UP
Ptprn2	ENSMUSG00000056553	19276	508	579	436	413	561	619.055	-0.998688	0.211992	-4.71096	2.46547e-06	2.47132e-05	DOWN
Pafah1b1	ENSMUSG00000020745	18472	336	310	817	820	883	525.612	0.603447	0.131435	4.5912	4.40697e-06	4.15162e-05	UP
Mink1	ENSMUSG00000020827	50932	368	283	851	864	858	525.072	0.630169	0.135717	4.64326	3.42954e-06	3.32074e-05	UP
Qtrt1	ENSMUSG00000002825	60507	297	291	987	1085	1198	485.694	1.11312	0.195151	5.70389	1.17106e-08	1.91792e-07	UP
Adam9	ENSMUSG00000031555	11502	192	176	956	761	1277	428.647	1.65828	0.213569	7.76461	8.18991e-15	3.63256e-13	UP
Spcs1	ENSMUSG00000021917	69019	629	657	543	524	611	590.414	-0.9845	0.172797	-5.69743	1.21628e-08	1.98989e-07	DOWN
Bcl2l2	ENSMUSG00000089682	12050	624	534	692	734	429	636.317	-0.673594	0.218189	-3.0872	0.00202054	0.0091311	DOWN
Sdhb	ENSMUSG00000009863	67680	657	610	568	531	535	581.97	-0.99514	0.143823	-6.91919	4.54227e-12	1.3343e-10	DOWN
Zbtb16	ENSMUSG00000066687	235320	61	112	1312	744	2078	320.378	3.16997	0.705513	4.49314	7.01808e-06	6.32233e-05	UP
Anxa7	ENSMUSG00000021814	11750	304	279	732	638	976	499.58	0.644296	0.183074	3.51931	0.000432671	0.00243145	UP
Dynll2	ENSMUSG00000020483	68097	751	715	479	443	261	663.268	-1.67138	0.228653	-7.30967	2.67791e-13	9.70556e-12	DOWN
Dhx34	ENSMUSG00000006019	71723	1119	1064	240	259	223	713.84	-2.95742	0.147865	-20.0008	5.42224e-89	1.41493e-85	DOWN
Gnai3	ENSMUSG00000000001	14679	321	288	849	676	828	488.646	0.586488	0.1467	3.99788	6.3912e-05	0.00044974	UP
Tprgl	ENSMUSG00000029030	67808	278	256	1059	881	1089	511.904	1.13984	0.161732	7.04768	1.8193e-12	5.71984e-11	UP
Aldh3a2	ENSMUSG00000010025	11671	299	253	1015	920	899	525.849	1.00194	0.144322	6.94241	3.85463e-12	1.15396e-10	UP
Ssr2	ENSMUSG00000041355	66256	588	528	536	543	568	607.386	-0.797929	0.16065	-4.96688	6.80396e-07	7.73635e-06	DOWN
Srsf3	ENSMUSG00000071172	20383	217	217	612	479	1208	370.241	1.03247	0.307143	3.36152	0.000775143	0.00403555	UP
Ltbr	ENSMUSG00000030339	17000	222	227	722	626	1037	458.923	1.03938	0.210515	4.93729	7.9214e-07	8.89071e-06	UP
Tpm3	ENSMUSG00000027940	59069	280	237	767	573	1258	458.306	0.964805	0.266563	3.61942	0.000295261	0.00173737	UP
Etnk1	ENSMUSG00000030275	75320	619	591	499	448	565	552.093	-1.04371	0.163605	-6.37941	1.77777e-10	4.0813e-09	DOWN
Arhgef16	ENSMUSG00000029032	230972	304	296	902	744	941	492.062	0.741593	0.154035	4.81444	1.47611e-06	1.56582e-05	UP
Mbnl2	ENSMUSG00000022139	105559	573	498	600	592	626	564.856	-0.594919	0.136755	-4.35024	1.3599e-05	0.0001138	DOWN
Bag1	ENSMUSG00000028416	12017	558	584	593	516	633	565.453	-0.760701	0.156621	-4.85694	1.19213e-06	1.28637e-05	DOWN
Efhd2	ENSMUSG00000040659	27984	263	277	662	516	1194	405.841	0.759963	0.279164	2.72228	0.00648329	0.0244237	UP
Pkd1	ENSMUSG00000032855	18763	318	282	1027	1006	787	508.751	0.874816	0.176067	4.96866	6.74178e-07	7.68799e-06	UP
Ptpn11	ENSMUSG00000043733	19247	256	253	833	722	1016	472.987	0.96942	0.176093	5.50516	3.68828e-08	5.39696e-07	UP
Atp5e	ENSMUSG00000016252	67126	599	584	562	493	652	542.798	-0.837894	0.179699	-4.66278	3.1197e-06	3.04754e-05	DOWN
Bzw1	ENSMUSG00000051223	66882	289	226	763	641	936	480.798	0.826287	0.16967	4.86996	1.11621e-06	1.21533e-05	UP
Spg20	ENSMUSG00000036580	229285	163	153	858	880	748	462.192	1.61659	0.170411	9.4864	2.39146e-21	2.3113e-19	UP
Tacc2	ENSMUSG00000030852	57752	121	135	862	614	2673	415.142	2.63652	0.584057	4.51414	6.35734e-06	5.78703e-05	UP
Ube2i	ENSMUSG00000015120	22196	342	302	814	692	1107	470.686	0.657332	0.198592	3.30996	0.000933099	0.00474643	UP
Gpr107	ENSMUSG00000000194	277463	174	172	1105	845	1468	451.185	1.93386	0.243356	7.94664	1.9164e-15	9.46534e-14	UP
2010300C02Rik	ENSMUSG00000026090	72097	511	521	569	671	306	576.219	-0.776126	0.261308	-2.97015	0.00297651	0.012695	DOWN
Ndufb11	ENSMUSG00000031059	104130	583	573	482	458	551	555.843	-0.998325	0.159727	-6.25021	4.09914e-10	8.87693e-09	DOWN
Serpina3n	ENSMUSG00000021091	20716	5	1	2149	972	1440	401.84	8.22198	0.837875	9.8129	9.90751e-23	1.06981e-20	UP
Procr	ENSMUSG00000027611	19124	52	30	1362	1001	2569	392.426	4.56027	0.383612	11.8877	1.37111e-32	3.4625e-30	UP
Creg1	ENSMUSG00000040713	433375	565	544	650	618	489	586.4	-0.69894	0.183607	-3.80673	0.000140819	0.000903609	DOWN
Slc39a1	ENSMUSG00000052310	30791	211	177	840	737	1053	457.927	1.40101	0.181962	7.69945	1.36653e-14	5.86187e-13	UP
Scamp1	ENSMUSG00000021687	107767	229	223	838	653	1011	441.723	1.10018	0.185199	5.94055	2.84059e-09	5.15953e-08	UP
Dcaf11	ENSMUSG00000022214	28199	604	548	518	555	493	577.295	-0.915382	0.141163	-6.48459	8.89744e-11	2.14649e-09	DOWN
Wapl	ENSMUSG00000041408	218914	310	263	761	633	843	474.806	0.604155	0.152812	3.95359	7.69866e-05	0.00052798	UP
Itpkc	ENSMUSG00000003752	233011	52	31	601	366	1806	243.926	3.71001	0.614858	6.03392	1.60025e-09	3.0894e-08	UP
Dvl3	ENSMUSG00000003233	13544	613	585	553	470	598	569.804	-0.929543	0.148036	-6.27915	3.40424e-10	7.48598e-09	DOWN
Anp32b	ENSMUSG00000028333	67628	336	312	805	702	1014	481.021	0.595219	0.183627	3.24147	0.00118917	0.00582749	UP
Irf6	ENSMUSG00000026638	54139	248	194	869	782	848	456.419	1.14421	0.213621	5.35626	8.49618e-08	1.14974e-06	UP
Il6ra	ENSMUSG00000027947	16194	174	162	1705	1183	1454	447.993	2.32395	0.208149	11.1649	6.05904e-29	1.24824e-26	UP
Rxrb	ENSMUSG00000039656	20182	284	213	988	913	913	484.257	1.14876	0.181845	6.31724	2.66268e-10	5.96418e-09	UP
Uqcrfs1	ENSMUSG00000038462	66694	514	543	599	564	604	544.572	-0.626879	0.145082	-4.32085	1.55431e-05	0.000128354	DOWN
2900026A02Rik	ENSMUSG00000051339	243219	281	254	684	750	915	421.362	0.775334	0.191778	4.04287	5.27998e-05	0.000379911	UP
Stk40	ENSMUSG00000042608	74178	190	141	798	613	1166	395.244	1.60334	0.243561	6.58288	4.61422e-11	1.18047e-09	UP
Qser1	ENSMUSG00000074994	99003	206	133	903	698	1267	389.993	1.72964	0.236082	7.32645	2.36322e-13	8.66531e-12	UP
Skil	ENSMUSG00000027660	20482	88	90	737	643	1120	282.798	2.44316	0.245992	9.93188	3.02511e-23	3.50846e-21	UP
Arhgap12	ENSMUSG00000041225	75415	197	205	727	539	707	342.533	0.92289	0.226877	4.0678	4.7459e-05	0.000346256	UP
Homer2	ENSMUSG00000025813	26557	644	505	451	423	354	611.913	-1.25746	0.147608	-8.51891	1.61061e-17	1.09641e-15	DOWN
Mlycd	ENSMUSG00000074064	56690	324	250	1011	857	838	485.755	0.882347	0.240525	3.66842	0.00024405	0.00146852	UP
Gclc	ENSMUSG00000032350	14629	142	106	564	245	1486	351.1	1.84439	0.664308	2.7764	0.0054964	0.0212172	UP
Abca3	ENSMUSG00000024130	27410	252	176	890	735	906	462.345	1.21081	0.158561	7.63624	2.23665e-14	9.31361e-13	UP
Lasp1	ENSMUSG00000038366	16796	266	206	845	724	1045	447.918	1.11278	0.204511	5.4412	5.29238e-08	7.48535e-07	UP
Erp44	ENSMUSG00000028343	76299	600	461	507	445	482	539.928	-0.919773	0.152919	-6.01476	1.80152e-09	3.44822e-08	DOWN
Zfp664	ENSMUSG00000079215	269704	267	231	1043	929	1025	503.036	1.22949	0.146407	8.39772	4.55248e-17	2.85113e-15	UP
Dtx4	ENSMUSG00000039982	207521	207	181	1070	900	916	426.659	1.53389	0.207128	7.4055	1.30658e-13	4.94132e-12	UP
Glg1	ENSMUSG00000003316	20340	274	248	1011	803	991	475.32	1.06193	0.152191	6.97756	3.00348e-12	9.13115e-11	UP
Pnisr	ENSMUSG00000028248	66625	618	539	635	624	399	574.169	-0.837272	0.208221	-4.02106	5.79363e-05	0.000412403	DOWN
Heca	ENSMUSG00000039879	380629	211	180	1092	885	1054	451.541	1.59335	0.203435	7.8322	4.79399e-15	2.18196e-13	UP
Dagla	ENSMUSG00000035735	269060	717	681	372	473	318	582.649	-1.62183	0.214812	-7.55002	4.352e-14	1.74269e-12	DOWN
H2afj	ENSMUSG00000060032	232440	246	289	931	698	1004	484.371	0.920606	0.217344	4.2357	2.27839e-05	0.000179803	UP
Klk1b4	ENSMUSG00000066513	18048	269	247	739	514	1149	419.699	0.849117	0.338657	2.5073	0.0121656	0.0409858	UP
Hipk1	ENSMUSG00000008730	15257	212	200	882	637	1291	409.074	1.40012	0.243908	5.74035	9.44792e-09	1.58041e-07	UP
Smg5	ENSMUSG00000001415	229512	207	168	955	793	1010	476.158	1.51947	0.15137	10.0381	1.03632e-23	1.27761e-21	UP
Arhgef2	ENSMUSG00000028059	16800	172	199	678	566	1028	344.671	1.23699	0.288562	4.28673	1.81326e-05	0.000147252	UP
Gstm2	ENSMUSG00000040562	14863	674	696	428	365	406	567.222	-1.56208	0.191821	-8.14345	3.8416e-16	2.11045e-14	DOWN
Tgif1	ENSMUSG00000047407	21815	59	61	791	668	1544	299.342	3.27389	0.319402	10.2501	1.18275e-24	1.69893e-22	UP
Nxf1	ENSMUSG00000010097	53319	609	566	528	523	507	551.645	-0.95405	0.144341	-6.60972	3.85059e-11	9.96508e-10	DOWN
Cox8a	ENSMUSG00000035885	12868	541	514	459	440	573	510.935	-0.883438	0.159611	-5.53496	3.11308e-08	4.64647e-07	DOWN
Gmppa	ENSMUSG00000033021	69080	601	570	450	464	524	553.406	-1.06578	0.138797	-7.67868	1.60735e-14	6.87602e-13	DOWN
Epb41l4b	ENSMUSG00000028434	54357	496	498	391	401	370	560.376	-1.13868	0.150649	-7.55846	4.0787e-14	1.64588e-12	DOWN
Senp6	ENSMUSG00000034252	215351	258	246	852	627	764	429.364	0.786085	0.187977	4.18182	2.89179e-05	0.000222163	UP
Tmem147	ENSMUSG00000006315	69804	570	518	564	564	524	526.094	-0.757103	0.142554	-5.311	1.09026e-07	1.44418e-06	DOWN
Ap2b1	ENSMUSG00000035152	71770	276	251	791	637	904	449.443	0.781188	0.161893	4.82535	1.39761e-06	1.48961e-05	UP
Amotl1	ENSMUSG00000013076	75723	279	191	920	642	1224	396.653	1.21276	0.238024	5.09514	3.48491e-07	4.15561e-06	UP
Ptpn3	ENSMUSG00000038764	545622	210	138	877	711	1035	432.006	1.56256	0.185249	8.43491	3.31452e-17	2.13561e-15	UP
Socs7	ENSMUSG00000038485	192157	274	213	668	542	821	393.354	0.702408	0.19736	3.55903	0.000372231	0.00212935	UP
Rhob	ENSMUSG00000054364	11852	240	218	796	688	1466	382.977	1.32143	0.266061	4.96667	6.81135e-07	7.73914e-06	UP
Tmem245	ENSMUSG00000055296	242474	497	406	400	507	242	561.242	-0.998951	0.250707	-3.98454	6.7612e-05	0.000472169	DOWN
Rnf40	ENSMUSG00000030816	233900	261	246	708	596	865	424.663	0.731397	0.173661	4.21164	2.53519e-05	0.000197578	UP
Cyc1	ENSMUSG00000022551	66445	470	463	531	483	555	501.169	-0.615581	0.13972	-4.40582	1.05382e-05	9.08073e-05	DOWN
Dusp16	ENSMUSG00000030203	70686	75	74	765	473	1675	295.103	2.91364	0.390033	7.47023	8.00577e-14	3.10263e-12	UP
Myo10	ENSMUSG00000022272	17909	203	234	761	445	967	381.817	0.930841	0.28192	3.30179	0.000960685	0.0048636	UP
Mybbp1a	ENSMUSG00000040463	18432	278	229	646	652	700	441.84	0.622893	0.171527	3.63145	0.000281833	0.00166893	UP
Col4a2	ENSMUSG00000031503	12827	203	193	832	597	1060	392.752	1.28238	0.232251	5.52155	3.36027e-08	4.96337e-07	UP
Hnrnpm	ENSMUSG00000059208	76936	338	252	884	592	844	475.263	0.616592	0.174126	3.54106	0.000398517	0.00226318	UP
Nr1d2	ENSMUSG00000021775	353187	527	596	526	594	416	521.643	-0.915777	0.253018	-3.61941	0.000295277	0.00173737	DOWN
Tjp1	ENSMUSG00000030516	21872	220	206	771	744	711	374.019	1.0245	0.162678	6.29776	3.01984e-10	6.71615e-09	UP
Tacc1	ENSMUSG00000065954	320165	299	228	737	676	950	431.906	0.810068	0.199831	4.05377	5.03998e-05	0.000364653	UP
Shb	ENSMUSG00000044813	230126	148	163	903	717	956	353.344	1.67768	0.200233	8.37862	5.35515e-17	3.28806e-15	UP
Igf1r	ENSMUSG00000005533	16001	191	178	911	751	1174	371.794	1.57609	0.22944	6.86927	6.453e-12	1.86755e-10	UP
St13	ENSMUSG00000022403	70356	507	398	512	472	525	504.782	-0.617461	0.136284	-4.5307	5.87896e-06	5.37657e-05	DOWN
Src	ENSMUSG00000027646	20779	202	189	910	689	1192	379.447	1.46759	0.227375	6.45449	1.08581e-10	2.55647e-09	UP
Cyp2b10	ENSMUSG00000030483	13088	0	0	848	384	2199	233.409	11.8101	1.81525	6.50603	7.71604e-11	1.88766e-09	UP
Cgnl1	ENSMUSG00000032232	68178	619	562	321	424	295	556.954	-1.53727	0.18276	-8.41141	4.05104e-17	2.5679e-15	DOWN
Ddrgk1	ENSMUSG00000068290	77006	588	549	489	447	413	529.019	-1.11569	0.140856	-7.92077	2.36038e-15	1.13364e-13	DOWN
Slk	ENSMUSG00000025060	20874	264	216	676	527	917	380.322	0.781739	0.208626	3.74709	0.000178901	0.00111507	UP
Ufc1	ENSMUSG00000062963	66155	573	504	578	405	558	523.575	-0.848208	0.156543	-5.41836	6.01481e-08	8.39339e-07	DOWN
Rhbdf2	ENSMUSG00000020806	217344	92	64	774	513	1399	296.089	2.74784	0.335026	8.20188	2.36662e-16	1.34254e-14	UP
St6galnac2	ENSMUSG00000057286	20446	332	289	903	749	826	477.142	0.635346	0.134852	4.71142	2.46e-06	2.46741e-05	UP
Eci2	ENSMUSG00000021417	23986	255	249	1020	926	754	421.855	1.05712	0.257193	4.11023	3.95267e-05	0.000292748	UP
Sox4	ENSMUSG00000076431	20677	46	30	464	202	1454	182.521	3.4426	0.739907	4.65275	3.27542e-06	3.1853e-05	UP
Fasn	ENSMUSG00000025153	14104	220	206	789	736	715	415.274	1.03289	0.164258	6.28821	3.21152e-10	7.10766e-09	UP
Gramd1b	ENSMUSG00000040111	235283	81	100	1040	907	1140	344.726	2.71617	0.277285	9.79557	1.17627e-22	1.26143e-20	UP
Yap1	ENSMUSG00000053110	22601	230	222	978	817	945	464.696	1.23376	0.190775	6.46709	9.99095e-11	2.37013e-09	UP
Plxnb1	ENSMUSG00000053646	235611	230	220	1047	804	1189	431.784	1.38829	0.181717	7.63986	2.17465e-14	9.10386e-13	UP
Klhdc2	ENSMUSG00000020978	69554	276	239	893	712	1085	436.738	1.0219	0.200255	5.10301	3.34287e-07	4.00454e-06	UP
Sptbn2	ENSMUSG00000067889	20743	171	149	1110	1186	1001	430.236	2.00933	0.184343	10.9	1.15288e-27	2.07479e-25	UP
Ap2a2	ENSMUSG00000002957	11772	274	205	730	614	931	423.659	0.892096	0.188373	4.7358	2.18195e-06	2.20975e-05	UP
Lgals1	ENSMUSG00000068220	16852	487	471	341	308	427	500.23	-1.19878	0.218865	-5.47725	4.31992e-08	6.24533e-07	DOWN
Hibadh	ENSMUSG00000029776	58875	535	401	552	522	515	505.499	-0.588248	0.155044	-3.79406	0.000148204	0.000943265	DOWN
Herc2	ENSMUSG00000030451	15204	296	233	815	656	878	458.139	0.792508	0.1645	4.81767	1.45246e-06	1.54282e-05	UP
Nipsnap2	ENSMUSG00000029432	14467	563	552	497	521	528	520.343	-0.891486	0.152705	-5.83796	5.28445e-09	9.21366e-08	DOWN
Arhgap5	ENSMUSG00000035133	11855	265	171	921	776	896	445.079	1.22409	0.197742	6.19031	6.00464e-10	1.26194e-08	UP
Zbtb4	ENSMUSG00000018750	75580	321	237	927	773	860	478.206	0.843793	0.174476	4.83615	1.32381e-06	1.41577e-05	UP
Sec14l1	ENSMUSG00000020823	74136	485	493	503	483	423	530.663	-0.838888	0.180955	-4.6359	3.55385e-06	3.42838e-05	DOWN
Rap1b	ENSMUSG00000052681	215449	255	197	629	511	898	397.665	0.814709	0.210839	3.86413	0.000111488	0.000733429	UP
Ier3	ENSMUSG00000003541	15937	19	7	425	294	1957	229.55	5.35239	0.901456	5.9375	2.89405e-09	5.25053e-08	UP
Fam114a2	ENSMUSG00000020523	67726	314	275	799	805	732	467.363	0.630222	0.168374	3.74299	0.000181845	0.00112938	UP
Celsr2	ENSMUSG00000068740	53883	542	435	534	529	337	536.125	-0.832993	0.207355	-4.01723	5.88861e-05	0.000417942	DOWN
Etfa	ENSMUSG00000032314	110842	541	468	503	520	435	508.21	-0.825158	0.179753	-4.59051	4.42173e-06	4.16052e-05	DOWN
Limk2	ENSMUSG00000020451	16886	274	234	1020	907	1028	447.632	1.18081	0.164135	7.19412	6.28637e-13	2.12125e-11	UP
Arf6	ENSMUSG00000044147	11845	255	180	812	555	864	386.056	1.00211	0.192206	5.21373	1.85078e-07	2.33315e-06	UP
Zyx	ENSMUSG00000029860	22793	126	93	868	663	1445	400.188	2.40652	0.303822	7.92082	2.35947e-15	1.13364e-13	UP
Sntb1	ENSMUSG00000060429	20649	396	352	366	464	272	530.588	-0.792951	0.246716	-3.21403	0.00130888	0.00632504	DOWN
Tapt1	ENSMUSG00000046985	231225	187	168	915	837	959	407.129	1.57151	0.252637	6.22044	4.95752e-10	1.06038e-08	UP
Dcaf6	ENSMUSG00000026571	74106	147	159	1384	985	1472	413.741	2.27486	0.24288	9.36621	7.51843e-21	7.0069e-19	UP
Pitpna	ENSMUSG00000017781	18738	282	275	725	706	758	461.014	0.611555	0.140204	4.36189	1.28943e-05	0.000108541	UP
Lrrfip1	ENSMUSG00000026305	16978	188	210	799	693	993	380.292	1.26949	0.208345	6.09323	1.10652e-09	2.19023e-08	UP
Pnrc1	ENSMUSG00000040128	108767	189	128	805	628	1120	358.544	1.65701	0.267034	6.20525	5.46112e-10	1.15547e-08	UP
Slc38a5	ENSMUSG00000031170	209837	697	840	154	200	175	598.123	-2.90929	0.302768	-9.60899	7.32624e-22	7.35301e-20	DOWN
Strn4	ENSMUSG00000030374	97387	224	241	762	716	761	433.733	0.899798	0.163951	5.48822	4.05995e-08	5.89125e-07	UP
Jmjd1c	ENSMUSG00000037876	108829	152	108	584	407	1043	264.392	1.61017	0.300286	5.3621	8.22587e-08	1.11605e-06	UP
Luc7l	ENSMUSG00000024188	66978	512	489	573	563	422	504.654	-0.723224	0.168445	-4.29353	1.75857e-05	0.000143033	DOWN
B2m	ENSMUSG00000060802	12010	800	473	366	448	372	483.19	-1.43618	0.205522	-6.98798	2.78866e-12	8.5612e-11	DOWN
Ift20	ENSMUSG00000001105	55978	606	602	431	472	343	550.158	-1.31693	0.173475	-7.59149	3.16241e-14	1.29618e-12	DOWN
Tspan13	ENSMUSG00000020577	66109	449	426	390	354	504	435.759	-0.853063	0.205701	-4.1471	3.36711e-05	0.000253916	DOWN
Galnt7	ENSMUSG00000031608	108150	230	179	650	548	717	426.718	0.870891	0.320665	2.71589	0.00660969	0.0248173	UP
Gtf2i	ENSMUSG00000060261	14886	515	378	545	597	300	532.585	-0.652876	0.243413	-2.68217	0.00731462	0.0269254	DOWN
Copz1	ENSMUSG00000060992	56447	476	444	421	408	518	487.23	-0.812592	0.149851	-5.42265	5.87206e-08	8.22351e-07	DOWN
Ddx54	ENSMUSG00000029599	71990	229	230	815	656	683	423.307	0.863101	0.16211	5.32416	1.01419e-07	1.35258e-06	UP
Dbt	ENSMUSG00000000340	13171	734	661	241	328	212	561.592	-2.1893	0.226798	-9.65306	4.7712e-22	4.91465e-20	DOWN
Selenok	ENSMUSG00000042682	80795	483	432	418	369	696	456.463	-0.667541	0.246787	-2.70493	0.00683181	0.0254801	DOWN
Mthfd2	ENSMUSG00000005667	17768	523	511	380	388	512	468.591	-1.05687	0.193972	-5.44856	5.07781e-08	7.20791e-07	DOWN
Gata4	ENSMUSG00000021944	14463	420	347	359	384	377	468.736	-0.808413	0.153762	-5.25755	1.45989e-07	1.87664e-06	DOWN
Wsb2	ENSMUSG00000029364	59043	256	245	708	603	780	409.841	0.695896	0.164549	4.22911	2.34622e-05	0.000184319	UP
Susd6	ENSMUSG00000021133	217684	173	168	718	595	877	354.647	1.31613	0.192778	6.82719	8.65923e-12	2.48311e-10	UP
Vapb	ENSMUSG00000054455	56491	453	469	488	489	521	501.24	-0.666215	0.162763	-4.09317	4.25517e-05	0.000313079	DOWN
Tmem30b	ENSMUSG00000034435	238257	264	205	719	638	687	427.054	0.768035	0.145495	5.27877	1.30056e-07	1.69409e-06	UP
Maea	ENSMUSG00000079562	59003	235	243	656	531	881	390.506	0.741504	0.226332	3.27618	0.0010522	0.0052416	UP
Ankrd17	ENSMUSG00000055204	81702	241	189	680	563	708	400.279	0.824102	0.15238	5.4082	6.36607e-08	8.84414e-07	UP
Stk38	ENSMUSG00000024006	106504	252	258	1019	738	1187	444.719	1.15692	0.188638	6.133	8.62375e-10	1.74899e-08	UP
Anapc16	ENSMUSG00000020107	52717	145	92	1250	763	1886	408.337	2.68628	0.337242	7.96544	1.64642e-15	8.23579e-14	UP
Cyfip2	ENSMUSG00000020340	76884	539	398	440	389	479	472.486	-0.871467	0.182229	-4.78225	1.73343e-06	1.80095e-05	DOWN
Tmc5	ENSMUSG00000030650	74424	38	29	370	419	1342	295.803	3.63431	0.633032	5.74112	9.40545e-09	1.57499e-07	UP
Insig1	ENSMUSG00000045294	231070	633	588	380	351	236	549.127	-1.6976	0.282874	-6.00127	1.95784e-09	3.6977e-08	DOWN
Mat2a	ENSMUSG00000053907	232087	227	186	820	672	926	427.632	1.18996	0.259891	4.57869	4.67894e-06	4.38409e-05	UP
Ubr3	ENSMUSG00000044308	68795	491	430	452	485	464	470.939	-0.751773	0.15322	-4.90649	9.27223e-07	1.02597e-05	DOWN
Tubb5	ENSMUSG00000001525	22154	269	220	653	485	1227	354.703	0.910725	0.305353	2.98253	0.00285877	0.0122798	UP
Map1lc3a	ENSMUSG00000027602	66734	190	205	754	723	806	370.551	1.16398	0.158831	7.32838	2.32944e-13	8.5615e-12	UP
Gbf1	ENSMUSG00000025224	107338	400	416	548	419	386	483.049	-0.641144	0.177899	-3.60398	0.000313377	0.00182739	DOWN
Pak2	ENSMUSG00000022781	224105	234	181	709	550	835	384.245	0.976536	0.18155	5.37887	7.49534e-08	1.02314e-06	UP
Actr1a	ENSMUSG00000025228	54130	213	152	751	650	949	413.072	1.33327	0.195362	6.82465	8.8141e-12	2.51829e-10	UP
Psme3	ENSMUSG00000078652	19192	298	222	741	633	786	441.844	0.699742	0.162927	4.29483	1.74825e-05	0.000142416	UP
Plvap	ENSMUSG00000034845	84094	513	506	564	532	584	481.104	-0.644034	0.168798	-3.81542	0.000135951	0.000877045	DOWN
Cldn10	ENSMUSG00000022132	58187	426	440	484	572	395	467.231	-0.61702	0.192769	-3.20083	0.00137033	0.00658337	DOWN
Rab11b	ENSMUSG00000077450	19326	192	157	811	615	1029	377.755	1.45283	0.229194	6.33887	2.31464e-10	5.24461e-09	UP
Btg3	ENSMUSG00000022863	12228	108	95	461	367	792	194.606	1.63128	0.287989	5.66438	1.47554e-08	2.38416e-07	UP
Nrbp1	ENSMUSG00000029148	192292	256	226	709	603	754	415.239	0.737635	0.201461	3.66142	0.000250823	0.00150432	UP
Hadh	ENSMUSG00000027984	15107	534	508	283	332	169	544.556	-1.76704	0.25237	-7.00179	2.52707e-12	7.80402e-11	DOWN
Limd1	ENSMUSG00000025239	29806	243	262	790	677	614	441.451	0.67349	0.177044	3.80408	0.000142334	0.000912583	UP
Usp24	ENSMUSG00000028514	329908	249	274	782	663	639	442.081	0.624223	0.160779	3.88248	0.000103396	0.000685963	UP
Jun	ENSMUSG00000052684	16476	73	60	560	443	958	262.775	2.51964	0.29677	8.49021	2.06261e-17	1.38602e-15	UP
Hspg2	ENSMUSG00000028763	15530	452	448	506	541	408	463.057	-0.668775	0.180252	-3.71023	0.000207073	0.00126745	DOWN
Cul1	ENSMUSG00000029686	26965	240	188	739	648	790	412.797	0.990314	0.178813	5.53827	3.05476e-08	4.57688e-07	UP
Stat6	ENSMUSG00000002147	20852	270	215	762	721	735	415.914	0.838056	0.158894	5.27431	1.33259e-07	1.73005e-06	UP
Arih2	ENSMUSG00000064145	23807	239	195	776	697	795	404.862	1.02803	0.147009	6.99298	2.69103e-12	8.294e-11	UP
Ywhah	ENSMUSG00000018965	22629	98	122	905	797	980	392.516	2.23288	0.222622	10.0299	1.12624e-23	1.36694e-21	UP
Sec23b	ENSMUSG00000027429	27054	451	394	314	272	390	478.378	-1.15381	0.187562	-6.15164	7.66876e-10	1.56954e-08	DOWN
Retreg3	ENSMUSG00000017802	67998	194	181	792	723	911	389.99	1.3308	0.162093	8.21009	2.21029e-16	1.25842e-14	UP
Gcdh	ENSMUSG00000003809	270076	511	489	462	439	556	485.596	-0.821341	0.165745	-4.95545	7.21613e-07	8.15173e-06	DOWN
Txnrd1	ENSMUSG00000020250	50493	225	173	483	420	768	331.6	0.71292	0.243359	2.92951	0.00339502	0.0141824	UP
Copg1	ENSMUSG00000030058	54161	495	380	442	444	490	471.565	-0.699344	0.159899	-4.37367	1.22172e-05	0.000103621	DOWN
Eif4g3	ENSMUSG00000028760	230861	265	200	899	770	877	385.755	1.09858	0.217986	5.03969	4.66296e-07	5.43618e-06	UP
Lmna	ENSMUSG00000028063	16905	209	181	625	524	925	397.594	1.04792	0.23985	4.36907	1.24777e-05	0.000105374	UP
Fbxw11	ENSMUSG00000020271	103583	184	176	491	383	731	309.917	0.787648	0.245076	3.2139	0.00130946	0.00632589	UP
Ezh1	ENSMUSG00000006920	14055	219	190	1058	930	1009	411.984	1.5132	0.185554	8.15503	3.49083e-16	1.93815e-14	UP
Vtn	ENSMUSG00000017344	22370	540	416	208	369	395	482.081	-1.31942	0.293435	-4.49648	6.90873e-06	6.24898e-05	DOWN
Wipi1	ENSMUSG00000041895	52639	213	193	853	666	1072	373.76	1.30841	0.200135	6.53765	6.24948e-11	1.55809e-09	UP
Ccdc85c	ENSMUSG00000084883	668158	239	217	753	629	718	410.342	0.840247	0.170365	4.93204	8.13749e-07	9.12016e-06	UP
Ric1	ENSMUSG00000038658	226089	425	408	461	370	357	439.271	-0.854269	0.21113	-4.04617	5.20618e-05	0.000375464	DOWN
Aldh1l2	ENSMUSG00000020256	216188	1029	931	58	77	99	591.942	-4.4243	0.28449	-15.5517	1.54949e-54	1.3478e-51	DOWN
Lpcat3	ENSMUSG00000004270	14792	244	179	746	625	746	397.45	0.969873	0.248386	3.9047	9.43436e-05	0.000632337	UP
Sardh	ENSMUSG00000009614	192166	467	451	588	356	630	433.338	-0.595269	0.214326	-2.7774	0.00547957	0.0211729	DOWN
Cdk5rap3	ENSMUSG00000018669	80280	459	459	465	420	528	467.191	-0.744605	0.150492	-4.94781	7.50546e-07	8.43596e-06	DOWN
Brd1	ENSMUSG00000022387	223770	248	241	734	637	720	385.505	0.730892	0.174467	4.18929	2.79828e-05	0.00021572	UP
Fbxw8	ENSMUSG00000032867	231672	209	135	740	581	912	369.879	1.3478	0.214233	6.29127	3.14872e-10	6.98293e-09	UP
Vldlr	ENSMUSG00000024924	22359	368	318	399	305	293	353.597	-0.822472	0.194369	-4.23149	2.32143e-05	0.000183014	DOWN
Bnip3	ENSMUSG00000078566	12176	173	106	857	739	873	360.015	1.79911	0.219503	8.19626	2.47975e-16	1.39293e-14	UP
Setd7	ENSMUSG00000037111	73251	306	296	850	819	726	421.702	0.629771	0.156808	4.0162	5.91438e-05	0.000419581	UP
Cmip	ENSMUSG00000034390	74440	199	161	616	473	895	334.955	1.10106	0.240396	4.5802	4.64531e-06	4.3578e-05	UP
Tuba4a	ENSMUSG00000026202	22145	481	405	404	346	508	396.156	-0.854603	0.233165	-3.66523	0.000247118	0.0014847	DOWN
Slc8b1	ENSMUSG00000032754	170756	176	116	1328	1136	983	414.167	2.21301	0.216591	10.2174	1.65684e-24	2.31617e-22	UP
Hdac11	ENSMUSG00000034245	232232	514	508	495	535	466	503.768	-0.812449	0.163145	-4.97991	6.36124e-07	7.29121e-06	DOWN
Oga	ENSMUSG00000025220	76055	162	141	641	556	966	318.605	1.47305	0.236042	6.24063	4.35798e-10	9.37265e-09	UP
Tmem183a	ENSMUSG00000042305	57439	275	233	830	659	780	405.917	0.79809	0.148127	5.38786	7.13004e-08	9.78396e-07	UP
Tfdp2	ENSMUSG00000032411	211586	447	409	436	473	370	482.914	-0.778516	0.184638	-4.21644	2.48186e-05	0.000193904	DOWN
Rchy1	ENSMUSG00000029397	68098	401	360	415	441	433	452.51	-0.598055	0.16345	-3.65895	0.000253252	0.00151632	DOWN
Abhd17a	ENSMUSG00000003346	216169	517	527	489	399	529	455.509	-0.929102	0.163994	-5.66546	1.46629e-08	2.37167e-07	DOWN
Gpx1	ENSMUSG00000063856	14775	582	525	454	397	489	445.621	-1.08692	0.150583	-7.2181	5.27201e-13	1.80621e-11	DOWN
Ttc7	ENSMUSG00000036918	225049	192	163	697	523	819	373.406	1.15889	0.190866	6.07175	1.26524e-09	2.48554e-08	UP
Mapk9	ENSMUSG00000020366	26420	455	390	505	411	496	444.267	-0.620322	0.1467	-4.22852	2.35234e-05	0.000184707	DOWN
Atp8b1	ENSMUSG00000039529	54670	416	372	358	378	377	435.959	-0.860217	0.16035	-5.36461	8.11228e-08	1.1016e-06	DOWN
D230025D16Rik	ENSMUSG00000031889	234678	160	166	919	937	805	339.654	1.66479	0.214758	7.75192	9.05131e-15	3.96964e-13	UP
Hnrnpd	ENSMUSG00000000568	11991	483	404	506	423	389	432.969	-0.787296	0.184132	-4.27573	1.90516e-05	0.000153679	DOWN
Usp48	ENSMUSG00000043411	170707	476	466	467	480	456	466.685	-0.787961	0.142951	-5.51211	3.54555e-08	5.21245e-07	DOWN
Psmd2	ENSMUSG00000006998	21762	211	190	632	554	775	381.907	0.927286	0.169956	5.45604	4.8687e-08	6.98069e-07	UP
Aldh18a1	ENSMUSG00000025007	56454	628	553	217	242	187	506.313	-2.22604	0.236277	-9.42131	4.45494e-21	4.22733e-19	DOWN
Itga3	ENSMUSG00000001507	16400	130	112	713	689	952	324.531	1.92258	0.242444	7.92999	2.1917e-15	1.06569e-13	UP
Lrp5	ENSMUSG00000024913	16973	171	122	917	672	871	350.265	1.71382	0.207819	8.24668	1.6286e-16	9.51453e-15	UP
Rbm17	ENSMUSG00000037197	76938	247	213	654	569	728	364.214	0.723873	0.162359	4.45846	8.25493e-06	7.33111e-05	UP
Abi1	ENSMUSG00000058835	11308	263	177	587	499	682	352.912	0.655844	0.186342	3.51957	0.000432251	0.00243007	UP
Cdc37	ENSMUSG00000019471	12539	416	366	489	403	443	449.995	-0.590031	0.14173	-4.16307	3.13999e-05	0.000238771	DOWN
Atp6v1b2	ENSMUSG00000006273	11966	270	201	761	636	793	389.117	0.862121	0.173709	4.96302	6.9407e-07	7.86897e-06	UP
Atp11a	ENSMUSG00000031441	50770	276	216	709	572	751	382.287	0.688496	0.191444	3.59633	0.000322737	0.00187638	UP
Polg	ENSMUSG00000039176	18975	239	192	855	750	808	404.601	1.12785	0.147358	7.65382	1.95097e-14	8.25578e-13	UP
Cdc42bpb	ENSMUSG00000021279	217866	222	169	645	579	758	350.789	0.986196	0.161739	6.09746	1.07769e-09	2.13587e-08	UP
Eprs	ENSMUSG00000026615	107508	374	340	357	307	409	412.373	-0.775662	0.171278	-4.52869	5.93515e-06	5.42479e-05	DOWN
Ssh3	ENSMUSG00000034616	245857	235	227	775	687	835	405.896	0.948673	0.179761	5.27742	1.31017e-07	1.70519e-06	UP
Klhl21	ENSMUSG00000073700	242785	220	265	625	622	870	375.639	0.751213	0.21155	3.551	0.00038377	0.00218976	UP
Rassf3	ENSMUSG00000025795	192678	251	171	546	557	557	351.902	0.629163	0.199377	3.15565	0.00160141	0.00752047	UP
Dnajb12	ENSMUSG00000020109	56709	191	230	711	611	848	371.13	0.989483	0.205457	4.81601	1.46456e-06	1.55462e-05	UP
Man1b1	ENSMUSG00000036646	227619	253	232	694	615	637	402.562	0.642661	0.143487	4.47889	7.50335e-06	6.72082e-05	UP
BC004004	ENSMUSG00000052712	80748	470	490	434	393	436	457.186	-0.972411	0.146877	-6.62058	3.57786e-11	9.28998e-10	DOWN
Zmym5	ENSMUSG00000040123	219105	254	253	764	736	811	396.124	0.823819	0.170463	4.83283	1.34605e-06	1.4376e-05	UP
Clic1	ENSMUSG00000007041	114584	120	83	611	414	1326	302.637	2.17651	0.364165	5.97671	2.27691e-09	4.23896e-08	UP
AW549877	ENSMUSG00000041935	106064	496	479	495	389	438	467.979	-0.927763	0.155362	-5.97163	2.34902e-09	4.35765e-08	DOWN
Atp5h	ENSMUSG00000034566	71679	475	392	414	366	490	444.585	-0.807764	0.150377	-5.3716	7.80432e-08	1.06162e-06	DOWN
Mob2	ENSMUSG00000025147	101513	229	179	823	711	789	382.164	1.15344	0.206287	5.59142	2.2522e-08	3.49829e-07	UP
Nek9	ENSMUSG00000034290	217718	246	249	683	565	744	382.335	0.640537	0.162336	3.94574	7.95529e-05	0.000543201	UP
Ypel5	ENSMUSG00000039770	383295	177	162	708	478	1260	365.245	1.4809	0.304516	4.86313	1.15544e-06	1.25456e-05	UP
Mogs	ENSMUSG00000030036	57377	514	440	377	403	373	467.947	-1.08246	0.16844	-6.42637	1.30686e-10	3.0723e-09	DOWN
Nploc4	ENSMUSG00000039703	217365	218	186	648	546	833	376.065	0.965427	0.201663	4.78734	1.69005e-06	1.76172e-05	UP
Cnn3	ENSMUSG00000053931	71994	156	135	625	458	737	291.19	1.28021	0.296735	4.31434	1.60082e-05	0.00013157	UP
Ubxn1	ENSMUSG00000071655	225896	249	248	701	549	787	369.177	0.665689	0.19706	3.37811	0.000729863	0.00382317	UP
Esyt1	ENSMUSG00000025366	23943	200	149	680	546	1005	336.699	1.31948	0.229033	5.76109	8.35746e-09	1.40702e-07	UP
Ccdc6	ENSMUSG00000048701	76551	256	209	679	475	1072	385.527	0.895639	0.26206	3.41769	0.000631556	0.00337369	UP
Dnaja2	ENSMUSG00000031701	56445	249	208	591	549	640	383.021	0.603586	0.148638	4.06076	4.89124e-05	0.000355535	UP
Adgrg1	ENSMUSG00000031785	14766	288	241	684	677	676	400.624	0.588737	0.150738	3.90569	9.39569e-05	0.000630014	UP
Coq9	ENSMUSG00000031782	67914	439	386	487	505	337	446.368	-0.6681	0.189011	-3.53472	0.000408214	0.00231321	DOWN
Fnbp1l	ENSMUSG00000039735	214459	173	100	776	548	976	308.406	1.72724	0.266255	6.48714	8.74824e-11	2.11698e-09	UP
Pccb	ENSMUSG00000032527	66904	516	574	357	296	344	451.818	-1.50241	0.185704	-8.09035	5.94959e-16	3.16846e-14	DOWN
Etfdh	ENSMUSG00000027809	66841	251	207	798	705	568	382.466	0.820411	0.244491	3.35558	0.000791973	0.00410866	UP
Rnf114	ENSMUSG00000006418	81018	221	179	716	632	696	388.613	0.995865	0.156447	6.3655	1.94656e-10	4.44924e-09	UP
Ddx21	ENSMUSG00000020075	56200	196	165	671	542	591	360.667	0.960835	0.170736	5.6276	1.82738e-08	2.89295e-07	UP
Tef	ENSMUSG00000022389	21685	579	704	145	324	110	524.617	-2.50217	0.523806	-4.7769	1.78015e-06	1.84459e-05	DOWN
Galnt6	ENSMUSG00000037280	207839	1090	952	175	180	248	536.301	-3.11909	0.172489	-18.0828	4.3528e-73	6.19562e-70	DOWN
Slc39a11	ENSMUSG00000041654	69806	576	640	338	329	333	459.594	-1.65292	0.183845	-8.99085	2.45333e-19	2.04318e-17	DOWN
Rtn4	ENSMUSG00000020458	68585	212	106	628	420	931	319.216	1.29637	0.295035	4.39397	1.11297e-05	9.52232e-05	UP
Notch1	ENSMUSG00000026923	18128	138	130	722	518	844	297.452	1.59054	0.23302	6.82578	8.74515e-12	2.50316e-10	UP
Fgfr1op2	ENSMUSG00000040242	67529	484	387	456	418	387	464.281	-0.821372	0.147335	-5.57486	2.47733e-08	3.81018e-07	DOWN
Shc1	ENSMUSG00000042626	20416	230	199	666	537	924	378.945	0.94646	0.219136	4.31906	1.56698e-05	0.000129128	UP
Mydgf	ENSMUSG00000019579	28106	380	364	360	406	466	424.695	-0.633812	0.20186	-3.13986	0.00169026	0.0078646	DOWN
Ube3b	ENSMUSG00000029577	117146	201	240	699	655	714	375.732	0.857217	0.168425	5.08961	3.58796e-07	4.2655e-06	UP
Ldhd	ENSMUSG00000031958	52815	216	192	670	594	762	383.61	0.950483	0.159906	5.94401	2.78138e-09	5.06373e-08	UP
Fbxl20	ENSMUSG00000020883	72194	267	167	726	640	853	365.527	1.00797	0.215421	4.67904	2.88216e-06	2.83667e-05	UP
Adrm1	ENSMUSG00000039041	56436	178	194	586	495	826	370.219	0.984766	0.231453	4.25472	2.09314e-05	0.000166611	UP
Eif1a	ENSMUSG00000057561	13664	163	158	558	428	1030	325.627	1.27991	0.292239	4.37965	1.18868e-05	0.000101147	UP
Cp	ENSMUSG00000003617	12870	152	95	684	516	538	310.563	1.46602	0.244848	5.98746	2.13142e-09	3.98705e-08	UP
Fosl2	ENSMUSG00000029135	14284	50	33	340	476	823	171.508	2.95759	0.349815	8.45474	2.79706e-17	1.84007e-15	UP
Tnrc18	ENSMUSG00000039477	231861	229	187	646	523	930	328.832	0.974344	0.228934	4.256	2.08116e-05	0.000165825	UP
Sort1	ENSMUSG00000068747	20661	473	445	357	340	240	440.852	-1.33168	0.181904	-7.32076	2.46577e-13	8.99919e-12	DOWN
Nab1	ENSMUSG00000002881	17936	432	355	318	358	320	423.295	-1.01342	0.158729	-6.38456	1.71895e-10	3.95787e-09	DOWN
Cap1	ENSMUSG00000028656	12331	238	183	645	559	736	377.103	0.84804	0.175031	4.8451	1.26551e-06	1.36086e-05	UP
Nr3c1	ENSMUSG00000024431	14815	422	339	333	392	236	409.845	-1.01195	0.229441	-4.4105	1.0313e-05	8.9161e-05	DOWN
Pxn	ENSMUSG00000029528	19303	187	162	555	445	849	313.522	1.0416	0.235858	4.41621	1.00445e-05	8.70317e-05	UP
Tm9sf4	ENSMUSG00000068040	99237	198	210	544	440	757	369.714	0.720519	0.22923	3.14321	0.00167104	0.00779139	UP
Golga7	ENSMUSG00000015341	57437	163	127	496	419	883	322.771	1.27358	0.27713	4.5956	4.31512e-06	4.0749e-05	UP
Nfe2l2	ENSMUSG00000015839	18024	114	117	501	481	739	257.623	1.52982	0.241653	6.33064	2.44148e-10	5.50811e-09	UP
Sgpp1	ENSMUSG00000021054	81535	374	325	413	412	359	397.708	-0.597088	0.148898	-4.01005	6.07048e-05	0.000429487	DOWN
Rnf4	ENSMUSG00000029110	19822	174	162	631	480	814	364.751	1.15118	0.208134	5.53096	3.18478e-08	4.73993e-07	UP
Stim1	ENSMUSG00000030987	20866	197	210	617	679	495	372.704	0.773896	0.216197	3.57959	0.000344138	0.00198626	UP
Rpl22l1	ENSMUSG00000039221	68028	499	380	356	376	378	393.379	-1.0146	0.14979	-6.77351	1.25699e-11	3.47714e-10	DOWN
Get4	ENSMUSG00000025858	67604	266	191	558	481	816	341.06	0.667518	0.21727	3.0723	0.00212417	0.0095241	UP
Flt1	ENSMUSG00000029648	14254	239	250	601	503	878	326.181	0.646892	0.242117	2.67182	0.0075442	0.0275851	UP
Ndufv1	ENSMUSG00000037916	17995	423	332	413	433	424	413.075	-0.602111	0.163643	-3.67941	0.000233771	0.00141264	DOWN
Mafk	ENSMUSG00000018143	17135	181	181	411	407	758	286.744	0.754043	0.300245	2.51142	0.0120245	0.0406538	UP
Slc35e1	ENSMUSG00000019731	270066	254	187	598	561	647	373.294	0.680933	0.154446	4.40887	1.03909e-05	8.97356e-05	UP
Dgcr2	ENSMUSG00000003166	13356	242	202	653	579	675	344.363	0.744042	0.174912	4.25382	2.10158e-05	0.000167198	UP
Ergic3	ENSMUSG00000005881	66366	452	436	409	305	434	411.094	-0.998038	0.170137	-5.86609	4.46196e-09	7.85837e-08	DOWN
Klf3	ENSMUSG00000029178	16599	186	160	438	385	645	271.354	0.72335	0.236425	3.05953	0.00221687	0.0098903	UP
Impdh1	ENSMUSG00000003500	23917	425	346	419	360	436	393.575	-0.70173	0.180506	-3.88757	0.000101253	0.000672885	DOWN
Slc7a6	ENSMUSG00000031904	330836	127	135	845	799	1018	357.981	1.97579	0.273462	7.22509	5.00764e-13	1.7194e-11	UP
Cyb5r3	ENSMUSG00000018042	109754	436	452	340	342	375	410.58	-1.11508	0.156298	-7.13433	9.72585e-13	3.1924e-11	DOWN
Maf1	ENSMUSG00000022553	68877	214	166	699	685	733	355.164	1.12476	0.222131	5.06349	4.11643e-07	4.83503e-06	UP
Cggbp1	ENSMUSG00000054604	106143	195	145	666	533	677	330.031	1.10771	0.17051	6.49642	8.22511e-11	2.00593e-09	UP
Fam149a	ENSMUSG00000070044	212326	412	359	288	283	288	435.143	-1.20249	0.165778	-7.25359	4.05873e-13	1.41531e-11	DOWN
Flii	ENSMUSG00000002812	14248	178	183	624	513	782	341.23	1.04073	0.189252	5.49917	3.81585e-08	5.55248e-07	UP
Cd151	ENSMUSG00000025510	12476	229	213	657	511	652	365.994	0.676389	0.16685	4.05387	5.03777e-05	0.000364653	UP
Ank	ENSMUSG00000022265	11732	127	176	973	1135	508	331.758	1.73589	0.36585	4.74482	2.08696e-06	2.12317e-05	UP
Gal	ENSMUSG00000024907	14419	823	812	96	235	255	464.16	-2.83297	0.640589	-4.42244	9.7591e-06	8.48879e-05	DOWN
Sbds	ENSMUSG00000025337	66711	143	132	750	541	884	338.351	1.61577	0.249382	6.47911	9.22635e-11	2.20882e-09	UP
Pcf11	ENSMUSG00000041328	74737	227	160	567	559	605	322.663	0.811269	0.175937	4.61112	4.00496e-06	3.80265e-05	UP
Ric8a	ENSMUSG00000025485	101489	229	215	638	569	717	359.839	0.751529	0.185651	4.04807	5.16419e-05	0.000372607	UP
Rbm5	ENSMUSG00000032580	83486	475	412	539	427	384	410.989	-0.755349	0.185262	-4.07719	4.55832e-05	0.000333932	DOWN
Cd82	ENSMUSG00000027215	12521	379	391	294	399	299	413.977	-0.994409	0.208773	-4.7631	1.90639e-06	1.95506e-05	DOWN
Nipal2	ENSMUSG00000038879	223473	216	218	656	565	594	372.583	0.697883	0.163446	4.26982	1.95632e-05	0.000157238	UP
Myo5b	ENSMUSG00000025885	17919	162	150	396	399	597	334.9	0.794925	0.255943	3.10588	0.00189717	0.00864241	UP
Egf	ENSMUSG00000028017	13645	553	440	259	299	252	446.929	-1.64444	0.191347	-8.59399	8.39967e-18	6.03274e-16	DOWN
Vps4a	ENSMUSG00000031913	116733	181	156	626	504	736	347.834	1.10682	0.179163	6.17776	6.50174e-10	1.35339e-08	UP
Sema7a	ENSMUSG00000038264	20361	311	361	312	229	458	324.945	-0.808339	0.28644	-2.82202	0.00477225	0.0189258	DOWN
Tmed4	ENSMUSG00000004394	103694	383	386	393	447	370	414.111	-0.707969	0.176818	-4.00394	6.22952e-05	0.000439548	DOWN
Phyh	ENSMUSG00000026664	16922	187	165	772	734	750	365.967	1.32098	0.16433	8.03862	9.0856e-16	4.74178e-14	UP
Smad3	ENSMUSG00000032402	17127	176	138	608	566	1003	312.249	1.43676	0.305834	4.69783	2.62944e-06	2.61558e-05	UP
Ube2g1	ENSMUSG00000020794	67128	209	211	563	452	674	343.285	0.63847	0.186208	3.4288	0.00060626	0.00326305	UP
Ddhd2	ENSMUSG00000061313	72108	282	251	858	929	525	370.607	0.762313	0.270245	2.82082	0.00479012	0.0189774	UP
Sun2	ENSMUSG00000042524	223697	66	92	972	659	1416	297.63	2.88133	0.330958	8.70604	3.14682e-18	2.3574e-16	UP
Uqcrc2	ENSMUSG00000030884	67003	425	324	408	383	386	396.854	-0.701198	0.144264	-4.86052	1.1708e-06	1.26864e-05	DOWN
Mpnd	ENSMUSG00000003199	68047	375	416	412	420	399	388.826	-0.730889	0.179653	-4.06833	4.73504e-05	0.000345875	DOWN
Frmd6	ENSMUSG00000048285	319710	71	82	450	203	543	157.554	1.58077	0.352638	4.4827	7.37052e-06	6.6132e-05	UP
Mtss1	ENSMUSG00000022353	211401	489	401	370	421	256	394.329	-1.11571	0.248309	-4.49322	7.01547e-06	6.32233e-05	DOWN
Brd4	ENSMUSG00000024002	57261	175	151	542	450	676	304.62	0.993102	0.202203	4.91142	9.04212e-07	1.00335e-05	UP
Atp5j2	ENSMUSG00000038690	57423	521	507	278	290	326	423.717	-1.56484	0.164252	-9.52708	1.61776e-21	1.57325e-19	DOWN
Irf2bpl	ENSMUSG00000034168	238330	111	102	825	868	1343	331.656	2.47167	0.251084	9.84399	7.27668e-23	8.02331e-21	UP
Nfx1	ENSMUSG00000028423	74164	377	347	392	395	419	383.812	-0.62441	0.154513	-4.04114	5.31923e-05	0.000382384	DOWN
Tjp2	ENSMUSG00000024812	21873	119	109	546	491	954	278.707	1.76141	0.276924	6.36064	2.00911e-10	4.58551e-09	UP
Tmem50a	ENSMUSG00000028822	71817	205	184	689	644	585	352.11	0.941961	0.193205	4.87545	1.08562e-06	1.18698e-05	UP
Rnf31	ENSMUSG00000047098	268749	313	147	554	513	925	306.42	0.782627	0.309634	2.52759	0.0114849	0.0391934	UP
Chmp1a	ENSMUSG00000000743	234852	258	197	609	484	771	353.911	0.676922	0.195101	3.46959	0.000521248	0.00286659	UP
Pip5k1c	ENSMUSG00000034902	18717	530	531	446	450	356	417.056	-1.12493	0.178591	-6.29894	2.9969e-10	6.67461e-09	DOWN
Cacul1	ENSMUSG00000033417	78832	200	182	577	493	674	328.61	0.827468	0.172059	4.80922	1.51524e-06	1.60189e-05	UP
Sirt2	ENSMUSG00000015149	64383	421	382	431	385	445	405.282	-0.711035	0.158238	-4.49345	7.00791e-06	6.32233e-05	DOWN
Pacsin2	ENSMUSG00000016664	23970	337	294	280	239	442	342.855	-0.756189	0.236102	-3.20281	0.00136093	0.00654225	DOWN
Lgals9	ENSMUSG00000001123	16859	576	338	204	268	365	379.495	-1.46243	0.274529	-5.32706	9.98177e-08	1.33235e-06	DOWN
Qdpr	ENSMUSG00000015806	110391	572	544	341	303	220	432.123	-1.73247	0.191077	-9.06687	1.22486e-19	1.03663e-17	DOWN
Utrn	ENSMUSG00000019820	22288	470	462	363	331	240	420.028	-1.36118	0.186251	-7.30832	2.70508e-13	9.7814e-12	DOWN
Spryd3	ENSMUSG00000036966	223918	165	144	637	431	745	308.726	1.18656	0.21374	5.55142	2.83356e-08	4.3031e-07	UP
Fermt2	ENSMUSG00000037712	218952	142	132	566	560	753	313.38	1.41582	0.197532	7.16756	7.63487e-13	2.53799e-11	UP
Dad1	ENSMUSG00000022174	13135	431	480	346	342	353	399.57	-1.17825	0.210884	-5.58718	2.3078e-08	3.57755e-07	DOWN
Tmem127	ENSMUSG00000034850	69470	209	214	735	618	562	373.543	0.811334	0.182136	4.45455	8.40676e-06	7.44484e-05	UP
Crls1	ENSMUSG00000027357	66586	199	186	552	525	440	335.644	0.617495	0.180603	3.41908	0.000628327	0.00335873	UP
Cox7b	ENSMUSG00000031231	66142	532	531	255	298	248	419.317	-1.76995	0.17797	-9.94518	2.64696e-23	3.0928e-21	DOWN
Bri3	ENSMUSG00000047843	55950	396	389	421	476	427	379.209	-0.607117	0.194166	-3.1268	0.00176723	0.00816208	DOWN
Dtnb	ENSMUSG00000071454	13528	385	386	388	345	355	390.936	-0.869126	0.146992	-5.91275	3.36449e-09	6.04104e-08	DOWN
Shroom3	ENSMUSG00000029381	27428	131	142	712	556	916	342.213	1.62576	0.278119	5.84555	5.04902e-09	8.81298e-08	UP
Chic2	ENSMUSG00000029229	74277	136	146	700	524	862	298.963	1.51389	0.212279	7.1316	9.92114e-13	3.24969e-11	UP
Leprot	ENSMUSG00000035212	230514	163	105	706	512	984	305.514	1.68645	0.265171	6.35985	2.01955e-10	4.60263e-09	UP
Cttn	ENSMUSG00000031078	13043	224	157	601	448	852	334.183	0.963817	0.236248	4.07968	4.50983e-05	0.000330728	UP
Slc7a2	ENSMUSG00000031596	11988	497	522	131	209	93	451.955	-2.59095	0.261166	-9.92068	3.38444e-23	3.89634e-21	DOWN
Psmd4	ENSMUSG00000005625	19185	195	169	530	560	586	334.624	0.846103	0.198513	4.26221	2.02413e-05	0.000162189	UP
Noc2l	ENSMUSG00000095567	57741	240	167	583	541	550	348.93	0.689443	0.155824	4.42451	9.6662e-06	8.42202e-05	UP
Aars	ENSMUSG00000031960	234734	327	273	305	234	414	352.605	-0.694712	0.262441	-2.64711	0.00811823	0.0293162	DOWN
Phc2	ENSMUSG00000028796	54383	121	90	618	474	844	273.849	1.83965	0.230332	7.98699	1.38279e-15	7.00656e-14	UP
Ctns	ENSMUSG00000005949	83429	172	134	574	467	1066	282.507	1.42416	0.299983	4.74748	2.05962e-06	2.09672e-05	UP
Crlf1	ENSMUSG00000007888	12931	364	343	375	383	416	376.066	-0.62983	0.150863	-4.17485	2.98186e-05	0.000228522	DOWN
Traf4	ENSMUSG00000017386	22032	114	127	521	454	720	273.362	1.44126	0.254938	5.6534	1.57308e-08	2.52872e-07	UP
Amd1	ENSMUSG00000075232	11702	388	314	252	239	209	355.995	-1.35884	0.210164	-6.46563	1.00878e-10	2.38949e-09	DOWN
Med13l	ENSMUSG00000018076	76199	100	124	577	423	822	263.476	1.64268	0.277337	5.92303	3.16062e-09	5.70113e-08	UP
Lpin3	ENSMUSG00000027412	64899	175	184	563	466	943	277.579	1.08435	0.281978	3.84553	0.000120291	0.000785405	UP
Mrpl30	ENSMUSG00000026087	107734	380	354	404	398	431	371.25	-0.613063	0.139764	-4.38641	1.15236e-05	9.83243e-05	DOWN
Gid4	ENSMUSG00000018415	66771	421	318	372	333	316	397.359	-0.887107	0.143173	-6.19605	5.78972e-10	1.22005e-08	DOWN
Mapk13	ENSMUSG00000004864	26415	108	137	818	655	891	292.192	1.89316	0.206107	9.18535	4.10176e-20	3.58778e-18	UP
Yipf6	ENSMUSG00000047694	77929	427	388	377	350	399	412.565	-0.895305	0.167631	-5.34092	9.24783e-08	1.24073e-06	DOWN
Iqgap2	ENSMUSG00000021676	544963	340	342	397	345	245	370.108	-0.832942	0.221357	-3.76288	0.000167967	0.0010549	DOWN
Coa3	ENSMUSG00000017188	52469	394	371	386	344	327	407.98	-0.896746	0.166304	-5.39222	6.95935e-08	9.57491e-07	DOWN
Psen1	ENSMUSG00000019969	19164	176	157	613	525	771	317.327	1.15627	0.201279	5.74461	9.2132e-09	1.5461e-07	UP
Srsf10	ENSMUSG00000028676	14105	252	202	762	550	646	343.592	0.74828	0.173766	4.30624	1.66052e-05	0.000135835	UP
Tmod3	ENSMUSG00000058587	50875	163	125	693	567	712	318.327	1.41863	0.204284	6.9444	3.80084e-12	1.14003e-10	UP
Kctd20	ENSMUSG00000005936	66989	115	108	735	550	1160	286.172	2.08592	0.264434	7.88822	3.06519e-15	1.43259e-13	UP
Slc17a5	ENSMUSG00000049624	235504	183	162	603	568	749	316.642	1.11564	0.217349	5.13293	2.85272e-07	3.46509e-06	UP
Slc30a4	ENSMUSG00000005802	22785	178	160	469	372	563	307.317	0.690005	0.202133	3.41361	0.000641084	0.00341642	UP
Brpf3	ENSMUSG00000063952	268936	260	200	716	567	628	357.089	0.697936	0.19051	3.66351	0.000248784	0.00149356	UP
Rexo2	ENSMUSG00000032026	104444	392	370	393	420	355	411.562	-0.743798	0.19563	-3.80206	0.000143499	0.000917796	DOWN
Sptssa	ENSMUSG00000044408	104725	415	315	432	353	304	375.579	-0.777306	0.174623	-4.45133	8.53415e-06	7.54484e-05	DOWN
Arhgef10l	ENSMUSG00000040964	72754	205	131	559	508	722	317.974	1.06477	0.208717	5.10148	3.3701e-07	4.02791e-06	UP
Tmem131l	ENSMUSG00000033767	229473	560	547	233	298	92	433.737	-2.18331	0.355365	-6.14385	8.05429e-10	1.642e-08	DOWN
Sp1	ENSMUSG00000001280	20683	255	193	644	503	752	335.503	0.726393	0.187869	3.86649	0.000110412	0.000727577	UP
Usp22	ENSMUSG00000042506	216825	186	186	549	450	655	288.739	0.784155	0.195976	4.00128	6.29999e-05	0.000444119	UP
Cul7	ENSMUSG00000038545	66515	173	149	719	508	646	312.197	1.17623	0.195747	6.00891	1.86779e-09	3.55333e-08	UP
Cox6b1	ENSMUSG00000036751	110323	396	382	365	340	346	377.42	-0.929547	0.139284	-6.67373	2.49377e-11	6.60658e-10	DOWN
6430548M08Rik	ENSMUSG00000031824	234797	368	418	287	374	302	373.958	-1.07271	0.197323	-5.43633	5.43887e-08	7.67867e-07	DOWN
Vasp	ENSMUSG00000030403	22323	185	120	414	321	910	290.452	1.07949	0.345046	3.12855	0.00175671	0.00812072	UP
Crebrf	ENSMUSG00000048249	77128	214	210	711	539	630	325.915	0.780389	0.18796	4.15188	3.29758e-05	0.000249301	UP
Nr1d1	ENSMUSG00000020889	217166	477	364	324	399	375	366.512	-0.962795	0.231982	-4.15031	3.32028e-05	0.000250896	DOWN
Ndufs7	ENSMUSG00000020153	75406	423	413	345	308	379	392.116	-1.06177	0.15344	-6.91973	4.5251e-12	1.33176e-10	DOWN
Sh3d19	ENSMUSG00000028082	27059	194	169	603	606	468	352.185	0.851324	0.20969	4.05993	4.90879e-05	0.000356645	UP
Atp5j	ENSMUSG00000022890	11957	504	396	331	280	268	395.404	-1.38958	0.174756	-7.95158	1.84149e-15	9.12412e-14	DOWN
Gpr108	ENSMUSG00000005823	78308	394	304	354	405	406	368.005	-0.611796	0.153058	-3.99715	6.41085e-05	0.000450717	DOWN
Pgpep1	ENSMUSG00000056204	66522	163	161	472	430	701	298.497	0.939552	0.225685	4.16311	3.13945e-05	0.000238771	UP
Lpin2	ENSMUSG00000024052	64898	89	94	619	674	881	265.981	2.20524	0.235971	9.34539	9.15541e-21	8.43213e-19	UP
Sgms1	ENSMUSG00000040451	208449	94	97	509	375	995	252.881	1.92354	0.360116	5.34146	9.22009e-08	1.23807e-06	UP
Zranb1	ENSMUSG00000030967	360216	208	170	502	495	710	310.812	0.818058	0.226179	3.61686	0.000298203	0.00175196	UP
Klf10	ENSMUSG00000037465	21847	79	74	914	990	896	276.455	2.83534	0.256701	11.0453	2.30996e-28	4.46506e-26	UP
Mfsd6	ENSMUSG00000041439	98682	204	168	579	517	490	320.759	0.734806	0.177486	4.14009	3.4717e-05	0.000261078	UP
Cebpg	ENSMUSG00000056216	12611	188	172	712	552	689	360.517	1.07432	0.231139	4.64796	3.35233e-06	3.25201e-05	UP
Abhd2	ENSMUSG00000039202	54608	217	176	549	430	724	308.935	0.75485	0.225472	3.34786	0.000814368	0.00420672	UP
Ufl1	ENSMUSG00000040359	67490	417	351	292	320	249	393.512	-1.18902	0.179336	-6.63015	3.35344e-11	8.73624e-10	DOWN
Nudt22	ENSMUSG00000037349	68323	316	344	307	305	426	356.363	-0.717107	0.202039	-3.54934	0.000386193	0.00220117	DOWN
Angptl4	ENSMUSG00000002289	57875	17	6	1191	736	1412	263.581	5.84603	0.686069	8.52105	1.58108e-17	1.081e-15	UP
Fbxl3	ENSMUSG00000022124	50789	275	195	666	545	610	326.959	0.600751	0.160613	3.74036	0.00018376	0.00114036	UP
Hnrnpc	ENSMUSG00000060373	15381	187	159	471	452	515	320.323	0.697128	0.179084	3.89274	9.91177e-05	0.00066094	UP
Klhdc3	ENSMUSG00000063576	71765	147	163	683	566	695	306.262	1.27815	0.174404	7.32865	2.32487e-13	8.5615e-12	UP
Plekha1	ENSMUSG00000040268	101476	210	145	649	738	507	328.655	1.07195	0.208926	5.13078	2.88544e-07	3.494e-06	UP
Abca1	ENSMUSG00000015243	11303	183	121	343	480	493	305.233	0.773029	0.223698	3.45569	0.000548895	0.00299549	UP
Herpud2	ENSMUSG00000008429	80517	196	176	525	445	641	310.866	0.751313	0.194258	3.8676	0.00010991	0.000724572	UP
Isca1	ENSMUSG00000044792	69046	369	336	369	362	358	370.253	-0.732939	0.16412	-4.46587	7.97429e-06	7.11011e-05	DOWN
Ptprk	ENSMUSG00000019889	19272	192	178	589	499	545	326.827	0.778454	0.186672	4.17018	3.04362e-05	0.000232345	UP
Arl2bp	ENSMUSG00000031776	107566	231	201	680	549	799	318.057	0.868191	0.187761	4.62392	3.76547e-06	3.60808e-05	UP
Scd2	ENSMUSG00000025203	20250	469	408	53	107	26	468.571	-3.57382	0.711946	-5.01979	5.17281e-07	5.98158e-06	DOWN
Plin2	ENSMUSG00000028494	11520	25	23	652	521	1276	254.888	4.30582	0.422723	10.1859	2.292e-24	3.06717e-22	UP
Mark4	ENSMUSG00000030397	232944	216	191	505	499	623	303.606	0.639334	0.211159	3.02774	0.00246391	0.0108118	UP
Tars	ENSMUSG00000022241	110960	319	271	274	248	294	364.514	-0.891141	0.167849	-5.30917	1.10125e-07	1.45751e-06	DOWN
Scg2	ENSMUSG00000050711	20254	158	180	723	405	461	323.678	0.850816	0.312763	2.72032	0.0065219	0.0245288	UP
Tanc2	ENSMUSG00000053580	77097	108	133	517	463	482	270.31	1.22873	0.19128	6.42375	1.32962e-10	3.12112e-09	UP
Map7	ENSMUSG00000019996	17761	196	134	503	471	584	275.579	0.88863	0.179399	4.95336	7.29414e-07	8.21023e-06	UP
Rnf19b	ENSMUSG00000028793	75234	196	160	529	441	537	281.16	0.722898	0.200039	3.61378	0.000301769	0.00176826	UP
Osbpl9	ENSMUSG00000028559	100273	148	135	551	457	745	285.332	1.26598	0.237359	5.3336	9.62827e-08	1.28736e-06	UP
Anxa6	ENSMUSG00000018340	11749	403	315	312	259	296	371.756	-1.08412	0.198913	-5.45025	5.03004e-08	7.16609e-07	DOWN
Rc3h1	ENSMUSG00000040423	381305	102	102	534	470	769	239.755	1.75175	0.249059	7.03348	2.01446e-12	6.29548e-11	UP
Adamts9	ENSMUSG00000030022	101401	172	128	397	336	698	222.201	0.897667	0.288628	3.11012	0.00187014	0.00854164	UP
Pdlim1	ENSMUSG00000055044	54132	149	152	416	413	706	277.859	0.98243	0.254211	3.86462	0.000111263	0.000732258	UP
Men1	ENSMUSG00000024947	17283	166	128	586	493	767	285.585	1.29304	0.204646	6.31844	2.64216e-10	5.94264e-09	UP
Macrod1	ENSMUSG00000036278	107227	363	415	313	357	306	373.747	-1.04117	0.184994	-5.62813	1.82173e-08	2.88693e-07	DOWN
Gna13	ENSMUSG00000020611	14674	118	107	646	473	787	281.898	1.71626	0.217631	7.88608	3.11833e-15	1.45309e-13	UP
Cnbd2	ENSMUSG00000038085	70873	7	28	663	889	1169	256.167	4.88512	0.42552	11.4803	1.65624e-30	3.70454e-28	UP
Rundc1	ENSMUSG00000035007	217201	171	122	528	469	616	317.556	1.10936	0.31597	3.51097	0.000446474	0.00250195	UP
Rbm15b	ENSMUSG00000074102	109095	163	171	609	443	700	304.57	1.01793	0.228672	4.45149	8.52756e-06	7.54327e-05	UP
Psmd7	ENSMUSG00000039067	17463	163	153	504	508	569	312.969	0.962185	0.156127	6.16284	7.14499e-10	1.47196e-08	UP
Ywhab	ENSMUSG00000018326	54401	173	145	631	445	624	293.32	1.05529	0.20049	5.26356	1.41296e-07	1.8193e-06	UP
Sytl1	ENSMUSG00000028860	269589	410	335	376	370	506	345.977	-0.607696	0.180636	-3.36421	0.000767637	0.0039983	DOWN
Anapc2	ENSMUSG00000026965	99152	207	221	610	457	602	319.984	0.590862	0.189776	3.11347	0.00184901	0.00845996	UP
Wiz	ENSMUSG00000024050	22404	207	138	606	490	587	302.974	0.934573	0.173317	5.39229	6.95652e-08	9.57491e-07	UP
Spen	ENSMUSG00000040761	56381	206	155	454	376	619	268.832	0.648646	0.228538	2.83824	0.00453627	0.0181231	UP
Cnnm3	ENSMUSG00000001138	94218	162	130	805	668	709	318.162	1.54388	0.223823	6.89776	5.28292e-12	1.54031e-10	UP
1810007D17Rik	ENSMUSG00000100001	69055	94	121	456	407	316	372.366	1.07984	0.255808	4.22129	2.42908e-05	0.000189971	UP
Pgs1	ENSMUSG00000017715	74451	132	145	541	386	689	290.41	1.16854	0.251611	4.64421	3.41382e-06	3.30756e-05	UP
Ppp2r2d	ENSMUSG00000041769	52432	126	113	652	552	681	274.827	1.61693	0.215172	7.5146	5.70838e-14	2.25129e-12	UP
Mecr	ENSMUSG00000028910	26922	359	364	389	364	386	347.552	-0.710327	0.158333	-4.48628	7.2476e-06	6.51037e-05	DOWN
H2afz	ENSMUSG00000037894	51788	432	383	302	257	245	373.759	-1.38084	0.189287	-7.29495	2.98778e-13	1.07047e-11	DOWN
Slc25a23	ENSMUSG00000046329	66972	501	476	203	221	153	417.881	-2.11939	0.22237	-9.53089	1.55936e-21	1.53553e-19	DOWN
Mvp	ENSMUSG00000030681	78388	110	93	469	300	759	261.867	1.54531	0.33355	4.63291	3.60558e-06	3.474e-05	UP
Cldn7	ENSMUSG00000018569	53624	142	133	548	409	629	274.853	1.16063	0.221853	5.23154	1.68101e-07	2.1398e-06	UP
Psat1	ENSMUSG00000024640	107272	314	311	242	239	471	315.869	-0.76117	0.291927	-2.6074	0.00912318	0.0323977	DOWN
Raly	ENSMUSG00000027593	19383	200	171	538	463	628	306.187	0.773837	0.170301	4.54393	5.52145e-06	5.06737e-05	UP
Pkp3	ENSMUSG00000054065	56460	137	141	640	515	790	291.737	1.43656	0.216574	6.63309	3.28737e-11	8.5784e-10	UP
Plcg1	ENSMUSG00000016933	18803	204	154	627	488	850	304.436	1.09889	0.238815	4.60142	4.1962e-06	3.96738e-05	UP
Tatdn2	ENSMUSG00000056952	381801	134	120	582	567	687	275.028	1.49367	0.18281	8.1706	3.06867e-16	1.71594e-14	UP
Enpp1	ENSMUSG00000037370	18605	130	73	526	564	368	199.639	1.50896	0.283989	5.31345	1.07571e-07	1.42733e-06	UP
Ddx50	ENSMUSG00000020076	94213	410	366	318	264	322	354.819	-1.14212	0.14999	-7.61467	2.64372e-14	1.09505e-12	DOWN
2210416O15Rik	ENSMUSG00000018378	70393	264	195	637	664	532	332.935	0.648423	0.172223	3.76503	0.00016653	0.00104671	UP
Cuedc1	ENSMUSG00000018378	103841	264	195	637	664	532	332.935	0.648423	0.172223	3.76503	0.00016653	0.00104671	UP
Ezr	ENSMUSG00000052397	22350	162	129	418	336	688	245.592	0.948781	0.268489	3.53378	0.000409666	0.00231976	UP
Tmem56	ENSMUSG00000028132	99887	96	113	660	474	677	270.712	1.73881	0.227546	7.64156	2.14611e-14	9.03272e-13	UP
Tle3	ENSMUSG00000032280	21887	91	102	496	391	745	207.501	1.70394	0.317385	5.36868	7.93163e-08	1.078e-06	UP
Fkbp2	ENSMUSG00000056629	14227	526	576	209	225	203	403.32	-2.1589	0.19523	-11.0583	1.99899e-28	3.91228e-26	DOWN
LOC114841036	ENSMUSG00000056629	114841036	526	576	209	225	203	403.32	-2.1589	0.19523	-11.0583	1.99899e-28	3.91228e-26	DOWN
Zfp652	ENSMUSG00000075595	268469	376	333	319	348	330	360.188	-0.865481	0.160678	-5.38642	7.18748e-08	9.84552e-07	DOWN
Gpt2	ENSMUSG00000031700	108682	378	416	452	451	233	330.933	-0.850559	0.284826	-2.98624	0.00282434	0.0121586	DOWN
Kdm3b	ENSMUSG00000038773	277250	184	150	552	445	803	302.483	1.06929	0.232188	4.60527	4.11941e-06	3.90421e-05	UP
Arl8a	ENSMUSG00000026426	68724	145	126	529	424	849	271.195	1.36904	0.251279	5.4483	5.08538e-08	7.21212e-07	UP
Pcif1	ENSMUSG00000039849	228866	210	211	572	443	629	306.538	0.595992	0.183558	3.24689	0.00116675	0.00573736	UP
Gas6	ENSMUSG00000031451	14456	473	366	268	297	317	367.389	-1.27899	0.186221	-6.86816	6.50363e-12	1.87873e-10	DOWN
Nfkbiz	ENSMUSG00000035356	80859	149	102	307	311	447	205.835	0.735891	0.242134	3.03919	0.00237217	0.0104741	UP
Hif1a	ENSMUSG00000021109	15251	135	147	344	278	584	249.307	0.721531	0.284743	2.53397	0.0112779	0.0385625	UP
Cast	ENSMUSG00000021585	12380	127	116	484	397	693	245.245	1.32988	0.261885	5.07812	3.81187e-07	4.51797e-06	UP
Pcnx	ENSMUSG00000021140	54604	164	167	577	581	468	310.792	0.93351	0.185672	5.02775	4.96261e-07	5.75552e-06	UP
Rab11fip3	ENSMUSG00000037098	215445	158	150	674	565	648	309.287	1.24988	0.232643	5.37251	7.76481e-08	1.05808e-06	UP
Grpel2	ENSMUSG00000024580	17714	161	235	638	550	498	324.74	0.706264	0.22981	3.07325	0.0021174	0.00949916	UP
Kpna4	ENSMUSG00000027782	16649	154	161	426	353	688	291.113	0.847219	0.257	3.29657	0.000978727	0.00493843	UP
Vti1b	ENSMUSG00000021124	53612	319	313	394	354	332	351.56	-0.591752	0.172862	-3.42325	0.000618763	0.00331553	DOWN
Cnot8	ENSMUSG00000020515	69125	184	204	589	577	616	291.346	0.830799	0.186387	4.45738	8.29662e-06	7.35978e-05	UP
Slc12a2	ENSMUSG00000024597	20496	198	150	466	437	472	278.436	0.628378	0.171136	3.6718	0.000240844	0.0014509	UP
Cdk9	ENSMUSG00000009555	107951	178	172	498	470	587	293.779	0.78778	0.174543	4.5134	6.37976e-06	5.80406e-05	UP
Zfp36l2	ENSMUSG00000045817	12193	205	118	696	532	378	296.858	0.971078	0.256045	3.79261	0.000149075	0.00094765	UP
Ppm1b	ENSMUSG00000061130	19043	215	210	539	460	745	317.605	0.669113	0.214216	3.12354	0.00178691	0.00823681	UP
Lmf2	ENSMUSG00000022614	105847	210	142	511	523	504	295.446	0.7797	0.171901	4.53574	5.74014e-06	5.25575e-05	UP
Gcat	ENSMUSG00000006378	26912	445	411	211	282	317	348.794	-1.4371	0.213652	-6.72635	1.73977e-11	4.71274e-10	DOWN
Sec13	ENSMUSG00000030298	110379	290	347	376	307	420	345.918	-0.586113	0.229407	-2.55491	0.0106216	0.0366708	DOWN
Foxn3	ENSMUSG00000033713	71375	155	131	420	428	587	242.645	0.969139	0.21582	4.49051	7.10539e-06	6.39363e-05	UP
BC034090	ENSMUSG00000033722	207792	744	709	277	263	52	392.69	-2.65389	0.820197	-3.23567	0.00121356	0.0059229	DOWN
Rnf181	ENSMUSG00000055850	66510	316	340	383	392	246	376.124	-0.727652	0.214806	-3.38749	0.000705352	0.00371092	DOWN
2410002F23Rik	ENSMUSG00000045411	668661	385	364	415	285	475	362.957	-0.720333	0.236122	-3.05068	0.00228324	0.0101271	DOWN
Tial1	ENSMUSG00000030846	21843	374	330	373	363	309	354.355	-0.788529	0.153071	-5.15138	2.58576e-07	3.16291e-06	DOWN
Casc3	ENSMUSG00000078676	192160	193	173	534	441	700	277.72	0.83026	0.197437	4.2052	2.60855e-05	0.000202489	UP
Cox6c	ENSMUSG00000014313	12864	372	340	355	296	360	327.266	-0.858024	0.190935	-4.49379	6.99655e-06	6.31747e-05	DOWN
Rab11a	ENSMUSG00000004771	53869	190	152	576	419	593	307.053	0.85442	0.187048	4.56792	4.92597e-06	4.58537e-05	UP
Ppcdc	ENSMUSG00000063849	66812	96	59	546	558	1630	330.837	2.79457	0.551095	5.07094	3.95859e-07	4.67418e-06	UP
Sulf2	ENSMUSG00000006800	72043	47	25	487	433	759	263.538	3.19948	0.375439	8.52197	1.56861e-17	1.07718e-15	UP
Cirbp	ENSMUSG00000045193	12696	468	360	465	374	498	335.468	-0.66505	0.247643	-2.68551	0.00724185	0.0266915	DOWN
Lrrfip2	ENSMUSG00000032497	71268	167	141	532	439	522	267.417	0.916874	0.177219	5.17367	2.29544e-07	2.84108e-06	UP
Ipmk	ENSMUSG00000060733	69718	126	120	683	535	955	266.249	1.77483	0.253224	7.00892	2.40165e-12	7.44607e-11	UP
Snx10	ENSMUSG00000038301	71982	63	38	631	416	976	223.282	2.97155	0.360868	8.23446	1.80372e-16	1.0421e-14	UP
Birc3	ENSMUSG00000032000	11796	74	78	634	500	738	213.954	2.25261	0.232689	9.68076	3.64001e-22	3.77429e-20	UP
Fbxo3	ENSMUSG00000027180	57443	336	339	360	372	346	347.914	-0.688248	0.155295	-4.43187	9.34212e-06	8.17605e-05	DOWN
Stard13	ENSMUSG00000016128	243362	298	286	315	352	247	342.673	-0.712886	0.197398	-3.61141	0.000304536	0.00178248	DOWN
Fam8a1	ENSMUSG00000069237	97863	216	183	565	479	588	332.157	0.672038	0.169832	3.95707	7.5876e-05	0.000521735	UP
Ppp6r1	ENSMUSG00000052296	243819	192	169	478	433	575	297.951	0.680411	0.173806	3.91476	9.04925e-05	0.000609919	UP
Arhgef28	ENSMUSG00000021662	110596	181	172	510	522	440	307.472	0.699729	0.198238	3.52975	0.000415951	0.00235025	UP
Card10	ENSMUSG00000033170	105844	214	137	569	527	604	284.376	0.928192	0.175953	5.27522	1.326e-07	1.72292e-06	UP
Tmem87b	ENSMUSG00000014353	72477	159	112	535	338	965	251.603	1.4034	0.33635	4.17245	3.01347e-05	0.000230605	UP
Prodh	ENSMUSG00000003526	19125	423	478	382	325	283	325.086	-1.23724	0.201412	-6.14281	8.10765e-10	1.64877e-08	DOWN
Sfxn3	ENSMUSG00000025212	94280	244	178	613	607	541	319.33	0.711082	0.181922	3.90871	9.27915e-05	0.000623268	UP
Cd36	ENSMUSG00000002944	12491	234	228	562	415	826	315.732	0.593584	0.240099	2.47225	0.0134264	0.0442285	UP
Smad4	ENSMUSG00000024515	17128	174	116	624	509	581	293.861	1.21168	0.187587	6.45927	1.05207e-10	2.4845e-09	UP
2510039O18Rik	ENSMUSG00000044496	77034	171	149	635	485	692	303.489	1.13794	0.18922	6.01387	1.81147e-09	3.45184e-08	UP
Dcaf12	ENSMUSG00000028436	68970	213	190	483	482	612	308.977	0.608359	0.178354	3.41097	0.000647315	0.00344728	UP
Zfpm1	ENSMUSG00000049577	22761	321	258	248	302	169	360.151	-1.03527	0.257648	-4.01815	5.86569e-05	0.000416504	DOWN
Cpeb2	ENSMUSG00000039782	231207	166	143	405	364	465	262.504	0.63749	0.247754	2.57308	0.0100797	0.0351855	UP
Sostdc1	ENSMUSG00000036169	66042	617	487	56	89	11	426.833	-4.15781	0.666307	-6.24007	4.37375e-10	9.39365e-09	DOWN
Bmpr2	ENSMUSG00000067336	12168	174	156	558	472	534	303.322	0.882821	0.161939	5.45155	4.99323e-08	7.12662e-07	UP
Setd2	ENSMUSG00000044791	235626	184	132	439	401	589	259.168	0.824467	0.227423	3.62525	0.000288678	0.00170495	UP
Aldh9a1	ENSMUSG00000026687	56752	338	360	307	280	202	356.97	-1.19138	0.214941	-5.54284	2.976e-08	4.47171e-07	DOWN
Kcnq1	ENSMUSG00000009545	16535	306	291	257	265	297	333.706	-0.906028	0.192785	-4.69968	2.60571e-06	2.59362e-05	DOWN
Mafg	ENSMUSG00000051510	17134	142	117	426	415	592	255.069	1.11032	0.207777	5.34381	9.10114e-08	1.22315e-06	UP
Kctd3	ENSMUSG00000026608	226823	102	113	592	382	745	268.866	1.62187	0.249671	6.49601	8.24808e-11	2.0084e-09	UP
Fkbp9	ENSMUSG00000029781	27055	407	350	330	321	266	339.257	-1.08049	0.172131	-6.27716	3.44816e-10	7.56132e-09	DOWN
Paxip1	ENSMUSG00000002221	55982	147	144	535	482	571	241.8	1.08305	0.207808	5.2118	1.8702e-07	2.35384e-06	UP
Ap2a1	ENSMUSG00000060279	11771	185	182	588	488	534	293.822	0.767248	0.17395	4.41074	1.03019e-05	8.91143e-05	UP
Suclg2	ENSMUSG00000061838	20917	440	380	257	278	257	357.118	-1.40642	0.164492	-8.55007	1.2301e-17	8.55985e-16	DOWN
B3galnt2	ENSMUSG00000039242	97884	374	324	388	374	244	377.137	-0.829275	0.198335	-4.18118	2.89998e-05	0.000222628	DOWN
Ppp1r13b	ENSMUSG00000021285	21981	174	149	640	472	636	289.327	1.07287	0.203088	5.28282	1.27214e-07	1.66121e-06	UP
Tnfaip8	ENSMUSG00000062210	106869	162	128	506	338	651	279.004	1.00377	0.249632	4.02102	5.79477e-05	0.000412403	UP
Tmprss2	ENSMUSG00000000385	50528	78	86	731	565	861	244.122	2.34465	0.243782	9.61782	6.72386e-22	6.83607e-20	UP
Hif1an	ENSMUSG00000036450	319594	184	176	564	505	608	313.186	0.855968	0.167222	5.11874	3.07579e-07	3.70443e-06	UP
Hspb8	ENSMUSG00000041548	80888	97	90	494	314	733	209.564	1.67182	0.320544	5.21559	1.83237e-07	2.31462e-06	UP
Otud7b	ENSMUSG00000038495	229603	160	142	411	444	437	255.628	0.739734	0.186679	3.9626	7.41392e-05	0.000512041	UP
1700017B05Rik	ENSMUSG00000032300	74211	11	16	505	443	1347	214.496	5.0239	0.638261	7.87124	3.51157e-15	1.61708e-13	UP
Poldip3	ENSMUSG00000041815	73826	181	180	485	427	617	287.494	0.715593	0.19089	3.74872	0.000177736	0.00110825	UP
Mettl26	ENSMUSG00000025731	68347	424	463	195	185	139	380.226	-2.1424	0.20948	-10.2273	1.49704e-24	2.11163e-22	DOWN
Rab26	ENSMUSG00000079657	328778	489	433	250	321	143	379.481	-1.7193	0.265803	-6.46833	9.90951e-11	2.35712e-09	DOWN
Nbeal2	ENSMUSG00000056724	235627	161	152	556	473	643	274.723	1.05223	0.20735	5.07468	3.88142e-07	4.59345e-06	UP
9530068E07Rik	ENSMUSG00000036275	213673	201	156	460	395	568	279.789	0.637934	0.186691	3.41706	0.000633014	0.00338032	UP
Lrrc58	ENSMUSG00000034158	320184	164	104	345	270	613	220.362	0.84574	0.300313	2.8162	0.00485956	0.0191883	UP
Abl2	ENSMUSG00000026596	11352	168	102	468	375	617	242.144	1.08665	0.230119	4.72211	2.33414e-06	2.35626e-05	UP
Pycr1	ENSMUSG00000025140	209027	618	565	69	89	92	420.215	-3.60077	0.210882	-17.0748	2.28468e-65	2.55508e-62	DOWN
Brsk2	ENSMUSG00000053046	75770	538	494	183	184	206	376.072	-2.21007	0.341686	-6.46815	9.92107e-11	2.35712e-09	DOWN
Nup50	ENSMUSG00000016619	18141	119	124	480	454	589	275.043	1.28148	0.195928	6.54056	6.12907e-11	1.53051e-09	UP
Mob1a	ENSMUSG00000043131	232157	178	159	502	403	536	296.511	0.732624	0.211586	3.46253	0.000535114	0.00293152	UP
Kdm1a	ENSMUSG00000036940	99982	170	107	574	458	631	259.862	1.23594	0.205914	6.00222	1.94638e-09	3.68488e-08	UP
Wdr1	ENSMUSG00000005103	22388	126	133	565	479	533	307.485	1.23911	0.169794	7.29775	2.92609e-13	1.05078e-11	UP
Eif4e2	ENSMUSG00000026254	26987	157	157	442	444	504	283.689	0.782684	0.179746	4.35439	1.33437e-05	0.00011204	UP
Crb3	ENSMUSG00000044279	224912	188	169	439	346	672	276.927	0.663062	0.2639	2.51255	0.0119861	0.040559	UP
Creb3	ENSMUSG00000028466	12913	159	125	457	394	539	284.076	0.933648	0.192151	4.85892	1.18027e-06	1.27533e-05	UP
1600012H06Rik	ENSMUSG00000050088	67912	166	153	563	519	590	303.338	1.02826	0.171356	6.00074	1.96415e-09	3.70514e-08	UP
Sec61g	ENSMUSG00000078974	20335	437	419	261	263	286	340.458	-1.44263	0.180429	-7.9956	1.28947e-15	6.57631e-14	DOWN
Cpn1	ENSMUSG00000025196	93721	515	438	156	150	231	361.113	-2.18691	0.279965	-7.81138	5.65638e-15	2.53759e-13	DOWN
Klf13	ENSMUSG00000052040	50794	146	148	566	466	719	241.286	1.20441	0.258492	4.65935	3.17204e-06	3.09244e-05	UP
Ints6l	ENSMUSG00000035967	236790	570	435	160	184	84	381.396	-2.57712	0.262386	-9.82189	9.06307e-23	9.85421e-21	DOWN
Rangap1	ENSMUSG00000022391	19387	117	105	463	411	625	262.964	1.39272	0.216939	6.41987	1.36388e-10	3.19674e-09	UP
Adck5	ENSMUSG00000022550	268822	99	101	477	454	384	207.333	1.35251	0.257388	5.25476	1.48218e-07	1.90218e-06	UP
Dnajb6	ENSMUSG00000029131	23950	137	146	531	451	587	272.177	1.1017	0.19286	5.71242	1.11379e-08	1.8351e-07	UP
Mvb12a	ENSMUSG00000031813	73711	385	354	299	300	311	342.579	-1.06035	0.167963	-6.31296	2.73745e-10	6.10544e-09	DOWN
Swi5	ENSMUSG00000044627	72931	351	304	311	309	306	338.356	-0.858396	0.145722	-5.89065	3.84677e-09	6.83306e-08	DOWN
Synj2	ENSMUSG00000023805	20975	229	175	663	502	681	303.642	0.83411	0.198888	4.19386	2.74242e-05	0.00021204	UP
Trim11	ENSMUSG00000020455	94091	143	132	585	542	829	289.178	1.46708	0.207686	7.06392	1.61874e-12	5.17238e-11	UP
Ccs	ENSMUSG00000034108	12460	144	130	487	489	394	259.799	0.963707	0.222882	4.32385	1.5333e-05	0.000127088	UP
Plcb3	ENSMUSG00000024960	18797	128	121	645	671	588	300.209	1.57533	0.198114	7.95164	1.8406e-15	9.12412e-14	UP
Tes	ENSMUSG00000029552	21753	146	136	521	297	696	227.278	1.05199	0.279615	3.76229	0.000168362	0.00105696	UP
Shtn1	ENSMUSG00000041362	71653	150	160	595	539	445	314.063	0.981297	0.215224	4.55942	5.12939e-06	4.73531e-05	UP
Ugcg	ENSMUSG00000028381	22234	105	68	346	326	770	196.327	1.71011	0.391646	4.36648	1.26266e-05	0.000106459	UP
Pank3	ENSMUSG00000018846	211347	162	175	594	497	586	282.004	0.945663	0.171725	5.50684	3.65322e-08	5.35566e-07	UP
Samd4b	ENSMUSG00000109336	233033	182	159	437	336	582	261.178	0.62618	0.221032	2.83299	0.00461154	0.0183722	UP
Dedd2	ENSMUSG00000054499	67379	169	155	482	404	668	249.466	0.896733	0.237709	3.7724	0.000161682	0.00101911	UP
Tnpo3	ENSMUSG00000012535	320938	158	133	538	420	490	287.088	0.953924	0.180923	5.27255	1.34541e-07	1.7438e-06	UP
Gatd3a	ENSMUSG00000053329	28295	318	352	338	369	269	345.808	-0.823883	0.199481	-4.13013	3.62555e-05	0.000271474	DOWN
Fam53c	ENSMUSG00000034300	66306	143	151	483	482	663	265.234	1.10167	0.21571	5.10718	3.26996e-07	3.9232e-06	UP
Pbxip1	ENSMUSG00000042613	229534	152	114	733	614	748	280.006	1.62141	0.183871	8.81822	1.16297e-18	8.92581e-17	UP
Tubb4b	ENSMUSG00000036752	227613	121	112	492	396	648	273.667	1.35483	0.246053	5.50625	3.6655e-08	5.36864e-07	UP
Stau1	ENSMUSG00000039536	20853	183	158	413	458	441	282.01	0.588125	0.16588	3.5455	0.000391874	0.0022295	UP
Camk1d	ENSMUSG00000039145	227541	353	277	337	419	238	325.955	-0.688137	0.241496	-2.84948	0.00437904	0.0175757	DOWN
Cdkn1b	ENSMUSG00000003031	12576	221	210	490	520	662	282.245	0.593758	0.203141	2.92289	0.00346803	0.0144297	UP
Cdk13	ENSMUSG00000041297	69562	161	127	545	458	514	280.888	1.04014	0.227866	4.56471	5.0018e-06	4.64478e-05	UP
Cobll1	ENSMUSG00000034903	319876	207	233	245	241	201	250.846	-0.726042	0.19677	-3.6898	0.000224433	0.00136252	DOWN
Padi2	ENSMUSG00000028927	18600	519	510	165	150	234	367.449	-2.27415	0.273996	-8.29992	1.04182e-16	6.22586e-15	DOWN
Clmn	ENSMUSG00000021097	94040	324	310	266	322	167	333.285	-1.10416	0.277324	-3.98147	6.84916e-05	0.000478098	DOWN
Tcim	ENSMUSG00000056313	69068	364	275	145	116	183	323.033	-1.8811	0.315106	-5.96973	2.37643e-09	4.39808e-08	DOWN
Msi2	ENSMUSG00000069769	76626	323	296	355	338	331	292.429	-0.63474	0.175282	-3.62126	0.000293175	0.0017276	DOWN
Mkrn1	ENSMUSG00000029922	54484	131	151	566	503	669	278.916	1.25116	0.211049	5.92829	3.06098e-09	5.52777e-08	UP
Ndufa4	ENSMUSG00000029632	17992	380	319	304	317	292	320.22	-0.97021	0.156502	-6.19934	5.67013e-10	1.19646e-08	DOWN
Pacs2	ENSMUSG00000021143	217893	203	172	493	426	544	296.902	0.603971	0.175877	3.43406	0.000594618	0.00321143	UP
Zscan26	ENSMUSG00000022228	432731	397	307	347	299	266	350.166	-0.981135	0.160571	-6.11028	9.94564e-10	1.98116e-08	DOWN
Tmpo	ENSMUSG00000019961	21917	196	144	478	426	462	298.202	0.653211	0.190182	3.43467	0.00059328	0.00320641	UP
Bet1	ENSMUSG00000032757	12068	373	384	245	223	206	360.818	-1.53472	0.186188	-8.24286	1.68137e-16	9.75006e-15	DOWN
Mrps24	ENSMUSG00000020477	64660	296	371	292	277	277	332.489	-1.03331	0.202071	-5.11362	3.16048e-07	3.79767e-06	DOWN
Rb1cc1	ENSMUSG00000025907	12421	187	170	537	477	597	276.856	0.81176	0.168975	4.80401	1.55516e-06	1.63637e-05	UP
Atp5l	ENSMUSG00000038717	27425	381	286	262	309	274	316.749	-1.00724	0.169141	-5.95501	2.60057e-09	4.77901e-08	DOWN
Plekhm2	ENSMUSG00000028917	69582	191	149	571	473	559	260.952	0.880067	0.186793	4.71146	2.45954e-06	2.46741e-05	UP
Mex3c	ENSMUSG00000037253	240396	86	79	501	486	744	238.653	2.02877	0.241705	8.39357	4.71596e-17	2.93007e-15	UP
Dync1i2	ENSMUSG00000027012	13427	169	156	456	438	579	278.181	0.818362	0.177103	4.62082	3.82225e-06	3.65599e-05	UP
Hadhb	ENSMUSG00000059447	231086	176	122	489	534	454	277.034	0.963808	0.233816	4.12207	3.75482e-05	0.000279949	UP
Rnf141	ENSMUSG00000030788	67150	254	280	296	340	209	324.08	-0.702546	0.221055	-3.17815	0.00148219	0.00703873	DOWN
Zbtb44	ENSMUSG00000047412	235132	189	171	660	523	634	290.026	0.971745	0.171756	5.65772	1.53399e-08	2.46842e-07	UP
Clec2d	ENSMUSG00000030157	93694	145	81	364	313	821	215.133	1.38558	0.407371	3.40128	0.000670705	0.00355372	UP
Zmat3	ENSMUSG00000027663	22401	65	63	604	364	762	252.947	2.3837	0.30944	7.70326	1.32634e-14	5.70509e-13	UP
Eif6	ENSMUSG00000027613	16418	145	112	369	339	533	245.688	0.915482	0.230699	3.9683	7.23859e-05	0.00050156	UP
Trim8	ENSMUSG00000025034	93679	168	142	358	353	493	270.276	0.599133	0.224741	2.66588	0.00767872	0.0279985	UP
Myc	ENSMUSG00000022346	17869	378	266	325	326	329	262.453	-0.741306	0.274168	-2.70384	0.00685433	0.0255459	DOWN
Mbd3	ENSMUSG00000035478	17192	307	287	244	238	283	326.293	-0.997192	0.167477	-5.95421	2.61329e-09	4.79113e-08	DOWN
Egr1	ENSMUSG00000038418	13653	35	20	245	113	516	102.783	2.63774	0.847277	3.1132	0.00185072	0.00846532	UP
Asb6	ENSMUSG00000039483	72323	194	155	510	450	641	281.368	0.839953	0.197221	4.25894	2.05397e-05	0.00016416	UP
Brap	ENSMUSG00000029458	72399	143	192	444	444	455	283.648	0.626736	0.21074	2.97398	0.00293964	0.0125651	UP
Jade1	ENSMUSG00000025764	269424	288	322	284	303	240	324.935	-0.928812	0.209552	-4.43238	9.31995e-06	8.16121e-05	DOWN
Hsd17b4	ENSMUSG00000024507	15488	137	108	560	493	500	275.041	1.3081	0.206426	6.33691	2.3442e-10	5.29627e-09	UP
Zdhhc5	ENSMUSG00000034075	228136	163	153	435	375	466	285.769	0.650185	0.163604	3.97413	7.06369e-05	0.000491102	UP
Zc3h4	ENSMUSG00000059273	330474	174	164	499	491	474	278.319	0.754068	0.163262	4.61878	3.86009e-06	3.68521e-05	UP
Ginm1	ENSMUSG00000040006	215751	161	144	468	350	508	264.68	0.755509	0.18756	4.0281	5.62295e-05	0.000401453	UP
Dnmt3a	ENSMUSG00000020661	13435	169	158	532	474	593	263.115	0.926752	0.166962	5.55067	2.84574e-08	4.31167e-07	UP
Bmf	ENSMUSG00000040093	171543	60	53	509	476	753	181.892	2.58138	0.323528	7.97885	1.47709e-15	7.43626e-14	UP
Rab5a	ENSMUSG00000017831	271457	172	158	428	341	548	262.324	0.630951	0.229043	2.75473	0.0058741	0.0224483	UP
Mturn	ENSMUSG00000038065	68235	213	171	667	660	293	308.289	0.726253	0.296036	2.45325	0.014157	0.0462169	UP
Grb7	ENSMUSG00000019312	14786	126	116	711	614	687	267.438	1.69248	0.234231	7.22571	4.98506e-13	1.71541e-11	UP
Kpna1	ENSMUSG00000022905	16646	138	139	449	398	511	273.529	0.9274	0.187134	4.9558	7.20346e-07	8.14329e-06	UP
Wfikkn2	ENSMUSG00000044177	278507	2	0	876	765	1175	237.549	9.11694	1.20531	7.56395	3.91007e-14	1.58191e-12	UP
Pex11a	ENSMUSG00000030545	18631	193	180	693	653	359	300.712	0.8328	0.263639	3.15886	0.00158387	0.00746049	UP
Srf	ENSMUSG00000015605	20807	105	92	499	424	550	275.941	1.54097	0.19509	7.8988	2.81603e-15	1.32803e-13	UP
Cebpb	ENSMUSG00000056501	12608	58	48	376	290	585	153.448	2.19819	0.326028	6.74233	1.55866e-11	4.25476e-10	UP
Mtfr1	ENSMUSG00000027601	67472	138	167	460	398	439	275.995	0.714789	0.192093	3.72106	0.000198391	0.00122147	UP
Ralgds	ENSMUSG00000026821	19730	90	70	426	260	746	203.607	1.79804	0.358724	5.01233	5.37749e-07	6.19996e-06	UP
Kat2a	ENSMUSG00000020918	14534	141	167	502	458	358	287.849	0.725995	0.211812	3.42754	0.00060908	0.0032726	UP
Chmp4c	ENSMUSG00000027536	66371	149	126	428	377	518	234.9	0.906334	0.216004	4.19591	2.71778e-05	0.000210342	UP
Pfkfb3	ENSMUSG00000026773	170768	65	59	291	226	458	130.124	1.60841	0.370048	4.34649	1.38335e-05	0.000115577	UP
Ampd2	ENSMUSG00000027889	109674	391	317	186	203	162	344.117	-1.71404	0.210198	-8.15441	3.50891e-16	1.94131e-14	DOWN
Atxn7l3b	ENSMUSG00000074748	382423	198	158	440	414	600	291.67	0.673524	0.238985	2.81827	0.00482832	0.0190998	UP
Suco	ENSMUSG00000040297	226551	164	125	378	316	429	211.753	0.601645	0.196887	3.05579	0.00224465	0.00998991	UP
Mtor	ENSMUSG00000028991	56717	136	150	508	402	500	269.131	0.930502	0.18386	5.06093	4.17219e-07	4.89318e-06	UP
Mier1	ENSMUSG00000028522	71148	126	142	548	522	636	246.588	1.3001	0.219965	5.91048	3.41103e-09	6.11759e-08	UP
Znrf1	ENSMUSG00000033545	170737	76	89	593	455	818	222.518	2.12276	0.273554	7.75992	8.49838e-15	3.74815e-13	UP
Apobec3	ENSMUSG00000009585	80287	154	70	410	351	516	260.029	1.17675	0.276368	4.25792	2.06338e-05	0.00016466	UP
Cops7a	ENSMUSG00000030127	26894	314	270	352	318	317	318.321	-0.601859	0.157735	-3.81565	0.000135827	0.000876603	DOWN
Rapgef5	ENSMUSG00000041992	217944	291	289	356	331	277	299.772	-0.631531	0.191982	-3.28953	0.00100356	0.00504584	DOWN
Tmcc3	ENSMUSG00000020023	319880	119	106	405	312	515	193.713	1.08813	0.244546	4.44958	8.60381e-06	7.59785e-05	UP
Tcf20	ENSMUSG00000041852	21411	160	134	506	433	608	273.429	1.03546	0.184928	5.59926	2.15272e-08	3.34709e-07	UP
Dhx40	ENSMUSG00000018425	67487	171	179	409	368	611	256.008	0.617242	0.238739	2.58542	0.00972606	0.0341207	UP
Wdr89	ENSMUSG00000045690	72338	246	367	368	295	377	295.175	-0.625899	0.223439	-2.80121	0.00509116	0.0199178	DOWN
Paip1	ENSMUSG00000025451	218693	148	154	458	368	486	266.251	0.749901	0.189686	3.95338	7.7054e-05	0.00052798	UP
Hibch	ENSMUSG00000041426	227095	355	292	310	334	283	327.108	-0.834906	0.164753	-5.06762	4.02811e-07	4.74196e-06	DOWN
Uqcr11	ENSMUSG00000020163	66594	340	377	242	208	308	306.63	-1.29409	0.253644	-5.10198	3.36126e-07	4.02349e-06	DOWN
Ndufa13	ENSMUSG00000036199	67184	420	448	252	210	217	334.788	-1.72531	0.201356	-8.56845	1.04884e-17	7.43062e-16	DOWN
Ndufa10	ENSMUSG00000026260	67273	320	303	346	306	363	302.206	-0.659947	0.16461	-4.00916	6.09363e-05	0.000430736	DOWN
Prkaca	ENSMUSG00000005469	18747	326	330	261	283	263	320.772	-1.06448	0.167211	-6.36606	1.9394e-10	4.43935e-09	DOWN
Spata13	ENSMUSG00000021990	219140	110	73	451	501	351	214.648	1.48826	0.242977	6.12512	9.06147e-10	1.82359e-08	UP
Slc27a4	ENSMUSG00000059316	26569	135	133	482	490	466	271.481	1.06186	0.191405	5.54771	2.89437e-08	4.36581e-07	UP
Ier2	ENSMUSG00000053560	15936	164	107	286	303	580	219.844	0.761804	0.291502	2.61338	0.00896516	0.0319307	UP
Golga1	ENSMUSG00000026754	76899	292	302	372	363	278	331.567	-0.595118	0.189075	-3.14753	0.00164659	0.00768881	DOWN
Smdt1	ENSMUSG00000022452	69029	349	329	270	217	257	313.936	-1.23132	0.172068	-7.156	8.30656e-13	2.7438e-11	DOWN
Mpc2	ENSMUSG00000026568	70456	165	202	576	501	446	274.138	0.678812	0.198107	3.42649	0.000611442	0.00328304	UP
Tbc1d17	ENSMUSG00000038520	233204	186	143	471	440	589	263.595	0.833969	0.218268	3.82084	0.000132997	0.000860113	UP
Shmt2	ENSMUSG00000025403	108037	340	283	237	268	291	304.612	-1.00115	0.175262	-5.71229	1.11463e-08	1.8351e-07	DOWN
Ndufb9	ENSMUSG00000022354	66218	384	316	253	291	256	303.643	-1.16024	0.173209	-6.69853	2.10526e-11	5.63455e-10	DOWN
Ndufb10	ENSMUSG00000040048	68342	301	317	278	290	243	308.908	-0.973326	0.186327	-5.22376	1.75323e-07	2.22269e-06	DOWN
Plod3	ENSMUSG00000004846	26433	187	135	413	416	469	260.682	0.660109	0.182981	3.60753	0.000309127	0.00180597	UP
Map3k11	ENSMUSG00000004054	26403	189	131	421	322	509	262.7	0.613893	0.209644	2.92827	0.00340857	0.0142315	UP
Atp5g1	ENSMUSG00000006057	11951	425	420	192	210	241	323.538	-1.7579	0.220193	-7.98344	1.42305e-15	7.18732e-14	DOWN
Sptlc2	ENSMUSG00000021036	20773	123	85	452	348	497	227.796	1.28544	0.203455	6.31803	2.64927e-10	5.94264e-09	UP
Gpat4	ENSMUSG00000031545	102247	152	125	470	457	417	248.805	0.922836	0.184063	5.01371	5.33905e-07	6.16472e-06	UP
Ppip5k2	ENSMUSG00000040648	227399	106	94	454	434	376	215.038	1.30144	0.203532	6.39428	1.61306e-10	3.73052e-09	UP
Lyrm9	ENSMUSG00000072640	66274	425	404	240	305	168	343.477	-1.57305	0.226664	-6.94003	3.92012e-12	1.16909e-10	DOWN
Eif2s1	ENSMUSG00000021116	13665	146	115	441	351	394	255.563	0.825674	0.176247	4.68477	2.8028e-06	2.76693e-05	UP
Sh3glb2	ENSMUSG00000026860	227700	435	384	225	271	138	344.153	-1.72189	0.23617	-7.29088	3.07933e-13	1.10076e-11	DOWN
Twf1	ENSMUSG00000022451	19230	155	124	412	384	500	255.822	0.858824	0.183138	4.68949	2.73887e-06	2.71236e-05	UP
Scp2	ENSMUSG00000028603	20280	310	322	286	308	244	322.154	-0.957127	0.197573	-4.84442	1.26983e-06	1.3627e-05	DOWN
Acbd3	ENSMUSG00000026499	170760	114	117	415	342	606	239.762	1.19067	0.239903	4.96312	6.93713e-07	7.86897e-06	UP
Kansl3	ENSMUSG00000010453	226976	146	106	538	486	594	261.255	1.32868	0.177992	7.46484	8.33995e-14	3.22416e-12	UP
Rnf38	ENSMUSG00000035696	73469	154	145	477	348	649	227.175	0.932543	0.265012	3.51888	0.000433379	0.00243379	UP
Selenow	ENSMUSG00000041571	20364	428	451	299	235	249	315.988	-1.53854	0.214535	-7.17152	7.41718e-13	2.47614e-11	DOWN
Zfp609	ENSMUSG00000040524	214812	154	131	427	328	499	224.451	0.774852	0.226043	3.4279	0.000608276	0.00327053	UP
Fnip2	ENSMUSG00000061175	329679	349	428	192	202	187	298.589	-1.79399	0.295754	-6.06583	1.31275e-09	2.57566e-08	DOWN
Tia1	ENSMUSG00000071337	21841	366	271	339	331	347	316.618	-0.676489	0.163625	-4.13439	3.55901e-05	0.000267002	DOWN
Atp6v0e	ENSMUSG00000015575	11974	133	116	471	361	593	246.127	1.15251	0.26995	4.26935	1.96047e-05	0.000157411	UP
Myl12a	ENSMUSG00000024048	67268	102	83	501	374	591	214.093	1.62465	0.223457	7.2705	3.58156e-13	1.26015e-11	UP
Ncoa6	ENSMUSG00000038369	56406	130	116	449	400	549	248.555	1.14494	0.185012	6.18845	6.07586e-10	1.27349e-08	UP
Agtpbp1	ENSMUSG00000021557	67269	458	384	181	180	166	332.932	-2.03207	0.198395	-10.2426	1.27803e-24	1.81909e-22	DOWN
A230056J06Rik	ENSMUSG00000021557	319469	458	384	181	180	166	332.932	-2.03207	0.198395	-10.2426	1.27803e-24	1.81909e-22	DOWN
Vps36	ENSMUSG00000031479	70160	164	127	507	415	441	263.686	0.871022	0.198614	4.38551	1.15715e-05	9.86791e-05	UP
Cmtm6	ENSMUSG00000032434	67213	192	127	476	342	485	246.813	0.676945	0.196061	3.45272	0.000554956	0.0030233	UP
Gpx3	ENSMUSG00000018339	14778	218	111	561	575	466	253.124	0.951738	0.26042	3.65462	0.000257561	0.00153976	UP
Dlgap4	ENSMUSG00000061689	228836	139	110	426	325	628	217.453	1.10889	0.258744	4.28565	1.82205e-05	0.000147889	UP
Arhgap32	ENSMUSG00000041444	330914	197	139	482	478	375	237.665	0.642643	0.220175	2.91879	0.00351394	0.0145719	UP
Bpgm	ENSMUSG00000038871	12183	167	163	510	497	428	283.702	0.758329	0.190902	3.97234	7.1169e-05	0.000493924	UP
Cald1	ENSMUSG00000029761	109624	358	293	281	266	260	296.658	-1.04578	0.221155	-4.72874	2.25915e-06	2.28646e-05	DOWN
Sil1	ENSMUSG00000024357	81500	317	286	253	296	287	299.876	-0.88591	0.172806	-5.12662	2.94994e-07	3.56658e-06	DOWN
Jmy	ENSMUSG00000021690	57748	148	165	479	379	487	251.457	0.73086	0.196165	3.72574	0.000194743	0.00119996	UP
Mmadhc	ENSMUSG00000026766	109129	157	151	438	311	464	243.189	0.608661	0.213521	2.8506	0.00436372	0.0175309	UP
Ndufv2	ENSMUSG00000024099	72900	318	278	309	269	268	296.036	-0.854864	0.166606	-5.13106	2.8812e-07	3.49156e-06	DOWN
Pcdh1	ENSMUSG00000051375	75599	74	82	604	418	825	238.627	2.18952	0.275759	7.93997	2.02231e-15	9.89481e-14	UP
Ptpn12	ENSMUSG00000028771	19248	77	65	516	359	747	211.055	2.14876	0.281524	7.63262	2.30023e-14	9.55297e-13	UP
Lrig1	ENSMUSG00000030029	16206	337	238	310	391	196	272.679	-0.698077	0.276755	-2.52236	0.011657	0.0396425	DOWN
Slc31a1	ENSMUSG00000066150	20529	292	250	308	311	154	313.388	-0.841802	0.269953	-3.11832	0.00181884	0.00834629	DOWN
Mark3	ENSMUSG00000007411	17169	128	122	442	412	518	254.643	1.09327	0.184799	5.91601	3.29846e-09	5.92927e-08	UP
Cd14	ENSMUSG00000051439	12475	15	18	256	163	1193	147.365	4.22406	0.848862	4.97614	6.48641e-07	7.42381e-06	UP
Map2	ENSMUSG00000015222	17756	371	319	273	305	228	294.494	-1.13005	0.210064	-5.37955	7.4671e-08	1.02018e-06	DOWN
Stx12	ENSMUSG00000028879	100226	163	142	373	353	545	247.275	0.698379	0.210173	3.32287	0.000890953	0.00454979	UP
Arrdc3	ENSMUSG00000074794	105171	82	73	422	237	703	161.645	1.76413	0.38252	4.61186	3.99083e-06	3.79383e-05	UP
Cyb5a	ENSMUSG00000024646	109672	353	361	218	270	160	306.56	-1.50004	0.220462	-6.80409	1.0169e-11	2.85333e-10	DOWN
Xrn2	ENSMUSG00000027433	24128	107	130	518	359	488	229.091	1.14829	0.210367	5.45851	4.80138e-08	6.89048e-07	UP
Arhgap26	ENSMUSG00000036452	71302	241	247	198	230	240	271.369	-0.910531	0.199676	-4.56004	5.11437e-06	4.72423e-05	DOWN
Zpr1	ENSMUSG00000032078	22687	110	128	492	444	540	245.671	1.26162	0.200895	6.27998	3.38626e-10	7.45692e-09	UP
Snx5	ENSMUSG00000027423	69178	309	242	298	293	301	283.276	-0.658854	0.166629	-3.95401	7.68524e-05	0.000527522	DOWN
Gne	ENSMUSG00000028479	50798	198	144	500	482	392	240.788	0.656469	0.207552	3.16291	0.00156199	0.00737518	UP
Mrpl38	ENSMUSG00000020775	60441	174	121	366	389	400	267.53	0.620166	0.178244	3.47931	0.0005027	0.00277629	UP
Acot1	ENSMUSG00000072949	26897	13	13	1024	1098	539	242.445	5.31871	0.704104	7.55386	4.22534e-14	1.70067e-12	UP
Ostc	ENSMUSG00000041084	66357	368	294	181	168	186	315.767	-1.66274	0.199523	-8.33358	7.84343e-17	4.75987e-15	DOWN
Rlim	ENSMUSG00000056537	19820	137	109	353	260	714	222.514	1.06914	0.328871	3.25095	0.0011502	0.00566312	UP
Smarca2	ENSMUSG00000024921	67155	381	318	266	319	186	307.824	-1.20879	0.22932	-5.27119	1.3554e-07	1.7553e-06	DOWN
Eps8l2	ENSMUSG00000025504	98845	160	121	486	488	628	246.235	1.1585	0.245659	4.71589	2.40656e-06	2.42157e-05	UP
Smim38	ENSMUSG00000109305	100040049	569	575	80	97	36	377.937	-3.78478	0.289196	-13.0872	3.89595e-39	1.79408e-36	DOWN
Chd6	ENSMUSG00000057133	71389	332	299	340	340	278	289.804	-0.756306	0.173394	-4.36177	1.29015e-05	0.000108543	DOWN
Abtb1	ENSMUSG00000030083	80283	176	121	487	448	628	242.387	1.04539	0.234659	4.45494	8.39156e-06	7.43557e-05	UP
Pprc1	ENSMUSG00000055491	226169	133	89	403	387	573	251.081	1.26859	0.239639	5.29374	1.19838e-07	1.57673e-06	UP
Ptpn23	ENSMUSG00000036057	104831	139	110	332	262	577	199.982	0.87309	0.283614	3.07844	0.00208086	0.00937284	UP
Zwint	ENSMUSG00000019923	52696	91	68	401	299	614	193.759	1.68788	0.280248	6.02281	1.71418e-09	3.29312e-08	UP
Ubald1	ENSMUSG00000039568	207740	163	160	466	482	495	273.418	0.797407	0.183287	4.3506	1.35764e-05	0.000113671	UP
Ndufa1	ENSMUSG00000016427	54405	268	304	256	213	275	272.678	-0.995379	0.225831	-4.40762	1.04513e-05	9.0158e-05	DOWN
Ndel1	ENSMUSG00000018736	83431	190	130	391	356	535	255.264	0.651188	0.206843	3.14822	0.00164271	0.00767299	UP
Flcn	ENSMUSG00000032633	216805	526	428	169	174	111	333.063	-2.42387	0.217916	-11.123	9.70028e-29	1.9225e-26	DOWN
Faf2	ENSMUSG00000025873	76577	161	117	385	357	436	244.278	0.729746	0.177227	4.11758	3.82878e-05	0.000284514	UP
Fbrs	ENSMUSG00000042423	14123	162	143	349	334	513	245.538	0.61025	0.213413	2.85947	0.00424344	0.0171367	UP
Lrrc45	ENSMUSG00000025145	217366	424	387	162	235	149	332.887	-1.92341	0.214247	-8.97754	2.76887e-19	2.28169e-17	DOWN
Wrnip1	ENSMUSG00000021400	78903	139	122	464	337	400	252.843	0.838534	0.178671	4.69316	2.69011e-06	2.66914e-05	UP
Pan3	ENSMUSG00000029647	72587	165	127	486	406	484	243.289	0.879542	0.172147	5.10925	3.23435e-07	3.88345e-06	UP
Vill	ENSMUSG00000038775	22351	116	135	498	343	622	218.209	1.16472	0.242419	4.8046	1.55064e-06	1.63271e-05	UP
Cox5b	ENSMUSG00000061518	12859	305	291	296	279	303	278.837	-0.804414	0.177365	-4.53536	5.75066e-06	5.26231e-05	DOWN
Atp5o	ENSMUSG00000022956	28080	347	282	220	231	254	279.482	-1.18983	0.209733	-5.67308	1.40253e-08	2.27323e-07	DOWN
Cog6	ENSMUSG00000027742	67542	475	441	216	180	168	329.867	-2.06317	0.16986	-12.1463	6.00283e-34	1.80743e-31	DOWN
Cd74	ENSMUSG00000024610	16149	351	184	278	216	292	279.532	-0.783436	0.270182	-2.89966	0.00373572	0.015376	DOWN
Gzf1	ENSMUSG00000027439	74533	127	128	503	348	533	214.789	1.06873	0.233536	4.57631	4.73253e-06	4.42636e-05	UP
Vps37c	ENSMUSG00000048832	107305	127	123	356	291	583	216.972	0.929879	0.268802	3.45934	0.000541496	0.00295924	UP
Lpgat1	ENSMUSG00000026623	226856	176	115	463	373	607	250.449	0.958992	0.228461	4.19762	2.6974e-05	0.000209041	UP
Chchd7	ENSMUSG00000042198	66433	287	235	297	325	182	284.16	-0.727547	0.249673	-2.914	0.0035683	0.0147645	DOWN
Prkar2a	ENSMUSG00000032601	19087	151	127	349	372	407	254.44	0.6645	0.174534	3.80728	0.000140502	0.000901945	UP
Lzts3	ENSMUSG00000037703	241638	352	320	315	284	217	316.135	-1.08062	0.198149	-5.45357	4.93699e-08	7.07088e-07	DOWN
Mmut	ENSMUSG00000023921	17850	386	340	258	255	175	324.35	-1.43483	0.211727	-6.77681	1.22855e-11	3.41054e-10	DOWN
Dyrk1a	ENSMUSG00000022897	13548	109	102	352	306	581	214.226	1.18796	0.254906	4.66039	3.15604e-06	3.08068e-05	UP
Pithd1	ENSMUSG00000028669	66193	117	131	449	361	520	244.182	1.04976	0.229552	4.57307	4.80633e-06	4.48466e-05	UP
Gga2	ENSMUSG00000030872	74105	285	287	285	240	203	296.167	-1.01877	0.184902	-5.50977	3.59301e-08	5.27728e-07	DOWN
Rbm6	ENSMUSG00000032582	19654	158	159	398	423	466	248.528	0.658768	0.172941	3.80922	0.000139407	0.000896017	UP
Yars	ENSMUSG00000028811	107271	265	262	187	171	168	297.052	-1.36797	0.207859	-6.58127	4.66449e-11	1.18945e-09	DOWN
Klk1b3	ENSMUSG00000066515	18050	148	171	502	314	547	231.252	0.714936	0.24447	2.92442	0.00345093	0.0143739	UP
Lamtor2	ENSMUSG00000028062	83409	278	344	264	205	233	298.019	-1.20508	0.225063	-5.35444	8.58209e-08	1.15936e-06	DOWN
Fah	ENSMUSG00000030630	14085	80	91	610	427	777	217.438	2.02972	0.289804	7.00375	2.49201e-12	7.71096e-11	UP
Prpf18	ENSMUSG00000039449	67229	102	150	423	412	499	256.727	1.02402	0.219762	4.65968	3.16695e-06	3.08941e-05	UP
Ube2o	ENSMUSG00000020802	217342	121	121	570	503	564	247.165	1.39298	0.184124	7.56545	3.86519e-14	1.5678e-12	UP
Sdhc	ENSMUSG00000058076	66052	272	254	275	216	311	279.545	-0.757276	0.182607	-4.14702	3.36836e-05	0.000253916	DOWN
Lgals3bp	ENSMUSG00000033880	19039	635	301	200	265	294	267.908	-1.62589	0.280487	-5.79668	6.76397e-09	1.15995e-07	DOWN
Ptx3	ENSMUSG00000027832	19288	0	0	346	72	792	89.7085	10.3004	1.78324	5.77624	7.63885e-09	1.29159e-07	UP
Akap8l	ENSMUSG00000002625	54194	444	400	250	232	125	310.257	-1.83431	0.252289	-7.27067	3.57696e-13	1.26015e-11	DOWN
Park7	ENSMUSG00000028964	57320	321	346	249	202	280	290.364	-1.24033	0.199714	-6.21054	5.28014e-10	1.12325e-08	DOWN
Gch1	ENSMUSG00000037580	14528	77	79	518	409	554	214.951	1.87913	0.21145	8.88689	6.2842e-19	4.96928e-17	UP
Asah1	ENSMUSG00000031591	11886	283	246	264	297	248	278.694	-0.742495	0.183783	-4.04006	5.34365e-05	0.000383611	DOWN
Prkcz	ENSMUSG00000029053	18762	140	135	523	435	564	241.046	1.10221	0.226812	4.85957	1.1764e-06	1.2729e-05	UP
Rnf103	ENSMUSG00000052656	22644	83	101	540	432	564	209.112	1.68618	0.233176	7.23139	4.78075e-13	1.65237e-11	UP
Dexi	ENSMUSG00000038055	58239	283	297	297	326	212	285.038	-0.837679	0.205849	-4.06939	4.71359e-05	0.000344702	DOWN
Bckdhb	ENSMUSG00000032263	12040	446	346	241	257	244	301.436	-1.44544	0.186385	-7.75513	8.82535e-15	3.88142e-13	DOWN
Sri	ENSMUSG00000003161	109552	158	121	485	377	535	235.154	0.96619	0.228153	4.23483	2.28722e-05	0.000180408	UP
Smim10l1	ENSMUSG00000072704	381820	266	295	291	270	169	323.31	-0.989381	0.233066	-4.24507	2.18526e-05	0.000173064	DOWN
Parp16	ENSMUSG00000032392	214424	379	421	170	206	165	310.512	-1.93064	0.187192	-10.3137	6.1093e-25	8.93957e-23	DOWN
Spin1	ENSMUSG00000021395	20729	139	92	481	329	586	219.479	1.24118	0.263243	4.71495	2.41769e-06	2.42964e-05	UP
Mef2a	ENSMUSG00000030557	17258	158	103	361	367	387	208.504	0.747622	0.191185	3.91047	9.21161e-05	0.000619529	UP
Arrdc2	ENSMUSG00000002910	70807	183	155	891	448	315	234.943	0.92144	0.366358	2.51513	0.0118988	0.0403158	UP
Aen	ENSMUSG00000030609	68048	70	63	399	376	532	244.373	1.9354	0.244232	7.92442	2.29205e-15	1.10761e-13	UP
Iars	ENSMUSG00000037851	105148	322	230	253	235	213	279.399	-1.00488	0.20004	-5.02341	5.0763e-07	5.87433e-06	DOWN
Psma3	ENSMUSG00000060073	19167	148	125	375	335	425	237.202	0.69636	0.203259	3.42597	0.00061261	0.00328819	UP
Adi1	ENSMUSG00000020629	104923	362	375	128	127	163	301.403	-2.18564	0.188561	-11.5911	4.57013e-31	1.05227e-28	DOWN
Zfr	ENSMUSG00000022201	22763	99	102	407	291	521	202.863	1.22775	0.272865	4.49949	6.81182e-06	6.16846e-05	UP
Tcta	ENSMUSG00000039461	102791	177	135	516	426	429	276.179	0.780559	0.259044	3.01323	0.00258484	0.0112564	UP
Pigt	ENSMUSG00000017721	78928	260	258	217	238	254	273.855	-0.909903	0.175352	-5.18903	2.11398e-07	2.63734e-06	DOWN
Extl1	ENSMUSG00000028838	56219	300	328	227	209	279	257.271	-1.18496	0.267605	-4.42803	9.5096e-06	8.30406e-05	DOWN
Tgfbrap1	ENSMUSG00000070939	73122	131	157	428	330	419	248.335	0.655816	0.193393	3.39111	0.000696102	0.00366965	UP
Sf3b3	ENSMUSG00000033732	101943	97	115	431	350	391	227.854	1.09398	0.209153	5.23055	1.69006e-07	2.14958e-06	UP
Gan	ENSMUSG00000052557	209239	114	91	425	268	757	192.046	1.45785	0.336491	4.33253	1.47409e-05	0.000122569	UP
Ppp1r10	ENSMUSG00000039220	52040	57	73	351	416	375	199.499	1.76526	0.298172	5.92027	3.21419e-09	5.78443e-08	UP
St3gal1	ENSMUSG00000013846	20442	69	42	392	319	441	213.249	2.0251	0.266624	7.59534	3.06994e-14	1.26158e-12	UP
Nipal3	ENSMUSG00000028803	74552	154	134	528	487	446	247.932	0.984089	0.213188	4.61606	3.91088e-06	3.72688e-05	UP
Grb2	ENSMUSG00000059923	14784	164	131	387	282	497	233.651	0.62163	0.22094	2.81356	0.00489955	0.0192987	UP
Zfp503	ENSMUSG00000039081	218820	272	258	207	179	75	303.007	-1.5634	0.311654	-5.01648	5.26281e-07	6.08117e-06	DOWN
Sec24d	ENSMUSG00000039234	69608	301	264	167	123	172	289.726	-1.65399	0.207075	-7.98741	1.37807e-15	7.00531e-14	DOWN
Ptk7	ENSMUSG00000023972	71461	162	122	396	282	505	234.487	0.699756	0.282693	2.47532	0.0133117	0.043906	UP
Man2b1	ENSMUSG00000005142	17159	296	250	211	201	214	276.364	-1.16046	0.16301	-7.11895	1.08751e-12	3.53996e-11	DOWN
Pabpn1	ENSMUSG00000022194	54196	294	250	292	360	247	292.313	-0.626867	0.206531	-3.03522	0.00240363	0.0105951	DOWN
Slc35b1	ENSMUSG00000020873	110172	304	261	257	207	225	277.814	-1.07477	0.227901	-4.71596	2.40574e-06	2.42157e-05	DOWN
Cebpz	ENSMUSG00000024081	12607	158	130	403	400	334	253.299	0.626087	0.190366	3.28886	0.00100595	0.00505543	UP
Ndufa2	ENSMUSG00000014294	17991	259	296	250	253	256	270.221	-0.918666	0.189314	-4.8526	1.21853e-06	1.31124e-05	DOWN
Slc39a3	ENSMUSG00000046822	106947	143	156	457	447	484	256.537	0.847707	0.184807	4.587	4.49663e-06	4.22845e-05	UP
Dym	ENSMUSG00000035765	69190	273	195	278	293	167	274.145	-0.687505	0.280196	-2.45366	0.0141412	0.0461847	DOWN
Hs6st1	ENSMUSG00000045216	50785	118	126	401	340	462	233.365	0.932456	0.200524	4.6501	3.31781e-06	3.22051e-05	UP
Gyg	ENSMUSG00000019528	27357	182	147	436	371	474	237.059	0.602885	0.207931	2.89944	0.00373826	0.0153824	UP
Nit1	ENSMUSG00000013997	27045	138	123	447	336	403	232.173	0.820034	0.203214	4.03532	5.4527e-05	0.000390544	UP
Tmem120a	ENSMUSG00000039886	215210	91	95	416	301	542	191.891	1.38664	0.244958	5.66073	1.50728e-08	2.43294e-07	UP
Fam214a	ENSMUSG00000034858	235493	117	92	356	317	502	226.871	1.13368	0.258138	4.39178	1.12429e-05	9.61386e-05	UP
Ehd1	ENSMUSG00000024772	13660	139	108	411	347	467	200.198	0.952835	0.198442	4.80157	1.57423e-06	1.65199e-05	UP
Crat	ENSMUSG00000026853	12908	179	151	465	525	341	253.837	0.659953	0.249431	2.64584	0.00814888	0.0293979	UP
Tsc22d4	ENSMUSG00000029723	78829	121	140	409	389	574	217.54	1.02167	0.230906	4.42459	9.66235e-06	8.42202e-05	UP
Khnyn	ENSMUSG00000047153	219094	119	77	537	426	821	212.398	1.83436	0.266656	6.87913	6.02194e-12	1.74927e-10	UP
Shisa4	ENSMUSG00000041889	77552	66	57	413	350	914	201.384	2.40465	0.371018	6.48123	9.09788e-11	2.18475e-09	UP
Rexo1	ENSMUSG00000047417	66932	153	163	402	350	481	233.316	0.594756	0.194638	3.0557	0.00224534	0.00999016	UP
5031439G07Rik	ENSMUSG00000036046	223739	105	76	451	314	534	214.539	1.48495	0.237902	6.24184	4.32451e-10	9.33914e-09	UP
Wdr13	ENSMUSG00000031166	73447	390	357	223	235	140	310.586	-1.67855	0.219339	-7.65276	1.96713e-14	8.30173e-13	DOWN
Iqsec2	ENSMUSG00000041115	245666	151	121	408	346	423	223.633	0.755439	0.196177	3.8508	0.000117731	0.000769329	UP
Igsf8	ENSMUSG00000038034	140559	103	63	449	415	521	202.009	1.71494	0.279682	6.13176	8.69106e-10	1.7581e-08	UP
Pja2	ENSMUSG00000024083	224938	267	225	257	236	231	261.063	-0.800507	0.162898	-4.91417	8.91594e-07	9.9216e-06	DOWN
Arpc5l	ENSMUSG00000026755	74192	147	117	351	290	389	242.656	0.605644	0.205444	2.94798	0.0031986	0.0134842	UP
Tcirg1	ENSMUSG00000001750	27060	317	297	267	263	246	270.269	-1.02345	0.170054	-6.01836	1.76197e-09	3.38077e-08	DOWN
Ctbp2	ENSMUSG00000030970	13017	118	69	434	349	525	224.608	1.45964	0.270342	5.39922	6.69295e-08	9.24903e-07	UP
Fpgs	ENSMUSG00000009566	14287	244	242	259	238	259	262.274	-0.727471	0.167787	-4.33569	1.45306e-05	0.000120949	DOWN
Zmym2	ENSMUSG00000021945	76007	140	115	463	427	351	232.607	0.926844	0.202116	4.58571	4.52445e-06	4.25206e-05	UP
Ndufs3	ENSMUSG00000005510	68349	280	227	279	281	241	267.562	-0.69434	0.181191	-3.8321	0.000127054	0.000826112	DOWN
Lgmn	ENSMUSG00000021190	19141	52	27	315	293	582	203.987	2.56908	0.341008	7.53378	4.9294e-14	1.95887e-12	UP
Fam220a	ENSMUSG00000083012	67238	150	127	398	424	365	236.955	0.744444	0.208055	3.57811	0.000346082	0.00199498	UP
Gprc5c	ENSMUSG00000051043	70355	113	92	417	361	569	193.084	1.3568	0.269337	5.03757	4.7149e-07	5.48857e-06	UP
Deaf1	ENSMUSG00000058886	54006	356	300	188	211	151	291.244	-1.60784	0.192839	-8.3377	7.57488e-17	4.61478e-15	DOWN
Arid5b	ENSMUSG00000019947	71371	91	73	217	203	252	121.88	0.678302	0.277541	2.44397	0.0145268	0.047286	UP
Matn4	ENSMUSG00000016995	17183	257	226	221	228	188	263.541	-0.957849	0.227468	-4.21093	2.54326e-05	0.000198082	DOWN
Hsd17b10	ENSMUSG00000025260	15108	276	254	270	232	299	259.78	-0.767695	0.176402	-4.35195	1.34929e-05	0.000113093	DOWN
Camkk2	ENSMUSG00000029471	207565	146	108	590	544	409	246.802	1.25168	0.230857	5.4219	5.89704e-08	8.24375e-07	UP
Lpp	ENSMUSG00000033306	210126	100	104	411	363	386	218.507	1.14125	0.204404	5.58329	2.36005e-08	3.64772e-07	UP
Cog8	ENSMUSG00000031916	97484	152	120	417	333	477	241.221	0.814604	0.202649	4.01977	5.82541e-05	0.000414019	UP
Lrrc8b	ENSMUSG00000070639	433926	81	103	330	234	564	164.045	1.23197	0.329938	3.73395	0.0001885	0.00116608	UP
Atg3	ENSMUSG00000022663	67841	258	202	270	235	261	249.882	-0.62031	0.167831	-3.69605	0.000218979	0.00133251	DOWN
Rab6a	ENSMUSG00000030704	19346	124	112	320	231	496	200.921	0.782011	0.269199	2.90496	0.00367301	0.0151617	UP
Npc2	ENSMUSG00000021242	67963	287	243	299	258	284	251.385	-0.693143	0.155122	-4.46836	7.88209e-06	7.03993e-05	DOWN
Ltbp4	ENSMUSG00000040488	108075	388	247	271	228	188	266.252	-1.23174	0.205641	-5.98976	2.10148e-09	3.93575e-08	DOWN
Atp6ap2	ENSMUSG00000031007	70495	230	227	214	254	307	248.196	-0.600151	0.201533	-2.97792	0.0029021	0.0124216	DOWN
Dixdc1	ENSMUSG00000032064	330938	287	212	313	271	226	256.039	-0.653072	0.214488	-3.04479	0.00232841	0.0103012	DOWN
Oaz2	ENSMUSG00000040652	18247	168	155	427	318	512	239.223	0.593464	0.228651	2.5955	0.0094453	0.0333	UP
Xpc	ENSMUSG00000030094	22591	84	75	450	516	545	225.699	1.89158	0.325145	5.81763	5.96877e-09	1.03149e-07	UP
Jak2	ENSMUSG00000024789	16452	110	96	295	266	429	190.331	0.903071	0.269091	3.356	0.000790783	0.00410384	UP
Gatad2b	ENSMUSG00000042390	229542	128	89	371	379	468	199.895	1.13835	0.203955	5.58138	2.38616e-08	3.68081e-07	UP
Dcaf10	ENSMUSG00000035572	242418	131	131	383	336	524	226.426	0.878077	0.257147	3.41469	0.000638553	0.00340758	UP
Plekhb1	ENSMUSG00000030701	27276	287	225	214	261	142	285.236	-1.07772	0.23539	-4.57842	4.68506e-06	4.3872e-05	DOWN
Chpf2	ENSMUSG00000038181	100910	105	116	457	408	426	237.287	1.17856	0.189893	6.20645	5.41965e-10	1.14825e-08	UP
Dst	ENSMUSG00000026131	13518	106	80	308	244	384	157.699	0.973682	0.250725	3.88347	0.000102976	0.000683758	UP
Plekha5	ENSMUSG00000030231	109135	122	129	427	358	603	203.747	1.09591	0.247352	4.43058	9.39796e-06	8.21574e-05	UP
Pard3	ENSMUSG00000025812	93742	141	79	439	407	447	216.01	1.21191	0.212344	5.70728	1.14798e-08	1.88603e-07	UP
1700094D03Rik	ENSMUSG00000027942	73545	292	269	285	264	244	274.797	-0.86194	0.164077	-5.25326	1.49431e-07	1.91616e-06	DOWN
4933434E20Rik	ENSMUSG00000027942	99650	292	269	285	264	244	274.797	-0.86194	0.164077	-5.25326	1.49431e-07	1.91616e-06	DOWN
Fdx1	ENSMUSG00000032051	14148	255	196	237	226	302	231.309	-0.591793	0.224283	-2.6386	0.00832495	0.0298953	DOWN
Pes1	ENSMUSG00000020430	64934	145	125	364	340	392	227.999	0.662144	0.182906	3.62013	0.000294456	0.00173384	UP
Egfr	ENSMUSG00000020122	13649	83	89	467	393	465	196.103	1.57535	0.279337	5.6396	1.70443e-08	2.71904e-07	UP
Tbc1d10b	ENSMUSG00000042492	68449	91	81	495	449	436	216.157	1.64435	0.20242	8.12343	4.53198e-16	2.46379e-14	UP
Ccdc186	ENSMUSG00000035173	213993	144	112	308	270	442	204.256	0.637067	0.226506	2.81258	0.00491455	0.0193415	UP
Sorbs3	ENSMUSG00000022091	20410	176	127	536	602	367	218.866	0.96761	0.247447	3.91037	9.21565e-05	0.000619534	UP
Tmem11	ENSMUSG00000043284	216821	158	119	351	301	462	213.468	0.651872	0.22508	2.89618	0.00377731	0.0155308	UP
Bcl2l13	ENSMUSG00000009112	94044	126	100	400	321	512	210.687	1.08835	0.223492	4.86972	1.11755e-06	1.21595e-05	UP
Wbp1	ENSMUSG00000030035	22377	238	268	278	260	285	260.959	-0.669197	0.192543	-3.47557	0.00050977	0.00281137	DOWN
Slc49a4	ENSMUSG00000022848	224132	111	125	432	392	614	213.85	1.23484	0.244096	5.05882	4.21867e-07	4.94399e-06	UP
Cdc42ep4	ENSMUSG00000041598	56699	136	116	301	267	712	205.692	0.981196	0.34846	2.8158	0.00486553	0.0191985	UP
Unc45a	ENSMUSG00000030533	101869	113	95	339	317	566	191.005	1.19445	0.261641	4.56522	4.98962e-06	4.63634e-05	UP
Wdfy3	ENSMUSG00000043940	72145	168	125	422	326	435	207.327	0.656822	0.202941	3.23651	0.00120999	0.00591273	UP
Tns3	ENSMUSG00000020422	319939	292	201	230	231	218	255.198	-0.885526	0.192144	-4.60865	4.05287e-06	3.84347e-05	DOWN
Map3k6	ENSMUSG00000028862	53608	14	24	372	240	731	117.599	3.75203	0.453781	8.26837	1.35801e-16	8.02354e-15	UP
Tox	ENSMUSG00000041272	252838	22	12	425	331	537	126.58	3.89561	0.364626	10.6839	1.2112e-26	2.01743e-24	UP
Wdr5	ENSMUSG00000026917	140858	145	99	400	347	492	213.742	0.99245	0.222911	4.45222	8.49856e-06	7.52187e-05	UP
Cpox	ENSMUSG00000022742	12892	242	218	244	243	278	246.914	-0.626266	0.186308	-3.36146	0.000775304	0.00403555	DOWN
Slc50a1	ENSMUSG00000027953	19729	261	248	253	301	192	263.274	-0.805677	0.211833	-3.80336	0.000142747	0.000913729	DOWN
Tmem115	ENSMUSG00000010045	56395	118	88	384	384	492	217.472	1.25955	0.217825	5.78237	7.36552e-09	1.24942e-07	UP
Abca7	ENSMUSG00000035722	27403	152	124	389	379	401	217.856	0.726436	0.182177	3.98753	6.67643e-05	0.000466664	UP
Rbm18	ENSMUSG00000026889	67889	93	109	364	282	483	192.585	1.10607	0.260542	4.24527	2.18332e-05	0.000172997	UP
Hmga1	ENSMUSG00000046711	15361	59	96	414	362	448	179.532	1.59537	0.27738	5.75157	8.84192e-09	1.48698e-07	UP
Gmeb2	ENSMUSG00000038705	229004	123	119	381	334	501	212.315	0.96283	0.246628	3.90397	9.46279e-05	0.000633971	UP
Idh3g	ENSMUSG00000002010	15929	297	250	236	207	200	267.835	-1.12505	0.187065	-6.01421	1.80768e-09	3.45156e-08	DOWN
Ctsc	ENSMUSG00000030560	13032	249	202	221	188	170	250.981	-0.996625	0.181378	-5.49472	3.91321e-08	5.68887e-07	DOWN
Cxcl14	ENSMUSG00000021508	57266	19	36	518	345	722	169.82	3.45631	0.372031	9.29038	1.53731e-20	1.39131e-18	UP
Ubxn7	ENSMUSG00000053774	224111	155	105	454	352	447	213.415	0.915798	0.207308	4.41757	9.98171e-06	8.66317e-05	UP
Atp5md	ENSMUSG00000071528	66477	285	237	245	226	325	231.888	-0.749835	0.216157	-3.46894	0.000522514	0.00287254	DOWN
Gipc1	ENSMUSG00000019433	67903	143	113	317	337	415	212.097	0.708372	0.248184	2.85422	0.00431432	0.0173828	UP
Tmem39a	ENSMUSG00000002845	67846	311	261	163	184	222	263.633	-1.36329	0.187622	-7.26616	3.69846e-13	1.29545e-11	DOWN
Ppdpf	ENSMUSG00000016344	66496	102	76	365	493	341	229.901	1.408	0.278145	5.06211	4.14635e-07	4.86652e-06	UP
Tpd52l2	ENSMUSG00000000827	66314	128	106	312	296	366	224.331	0.699798	0.213135	3.28336	0.00102579	0.00513947	UP
Tmem65	ENSMUSG00000062373	74868	137	119	447	376	337	215.918	0.819819	0.186329	4.39985	1.08326e-05	9.2986e-05	UP
Rhpn2	ENSMUSG00000030494	52428	120	93	299	237	538	194.752	0.974471	0.296354	3.2882	0.0010083	0.0050648	UP
Fam160a1	ENSMUSG00000051000	229488	135	123	433	365	362	208.888	0.806188	0.223274	3.61076	0.000305301	0.00178562	UP
Pdrg1	ENSMUSG00000027472	68559	250	239	308	284	205	271.016	-0.657596	0.204906	-3.20925	0.00133082	0.00641918	DOWN
Fam234a	ENSMUSG00000024187	106581	134	148	387	368	340	230.701	0.590164	0.182661	3.23092	0.00123391	0.00600911	UP
Spg21	ENSMUSG00000032388	27965	122	154	394	298	405	220.07	0.611326	0.233045	2.62321	0.00871059	0.0310665	UP
Tnfrsf12a	ENSMUSG00000023905	27279	17	18	311	264	733	131.264	3.85254	0.45178	8.52746	1.49593e-17	1.03637e-15	UP
Ccnd2	ENSMUSG00000000184	12444	260	244	168	200	164	255.08	-1.28002	0.243863	-5.24893	1.52988e-07	1.95537e-06	DOWN
Fam104a	ENSMUSG00000041629	28081	133	108	353	293	414	207.438	0.777633	0.216544	3.59111	0.000329271	0.00191011	UP
Abhd4	ENSMUSG00000040997	105501	95	78	460	321	584	202.532	1.6167	0.277717	5.82141	5.83533e-09	1.0129e-07	UP
Snx1	ENSMUSG00000032382	56440	153	95	400	294	436	212.688	0.836861	0.210441	3.9767	6.98787e-05	0.000486695	UP
Arid1b	ENSMUSG00000069729	239985	136	117	375	422	347	216.781	0.822316	0.192731	4.26666	1.9842e-05	0.000159234	UP
Naa30	ENSMUSG00000036282	70646	120	145	351	320	371	230.108	0.603144	0.193915	3.11035	0.00186865	0.00853918	UP
Fech	ENSMUSG00000024588	14151	285	242	231	258	218	257.624	-0.930611	0.191464	-4.86051	1.17084e-06	1.26864e-05	DOWN
Adgrf5	ENSMUSG00000056492	224792	238	211	257	248	253	222.509	-0.603881	0.183492	-3.29105	0.000998145	0.00502345	DOWN
Bzw2	ENSMUSG00000020547	66912	102	102	277	261	350	202.21	0.756611	0.228822	3.30655	0.000944515	0.00479672	UP
Cebpd	ENSMUSG00000071637	12609	75	41	277	287	665	145.283	2.06493	0.4647	4.44358	8.84735e-06	7.79972e-05	UP
4930453N24Rik	ENSMUSG00000059920	67609	127	119	439	382	489	230.339	1.04934	0.187006	5.6113	2.00816e-08	3.14379e-07	UP
Rev3l	ENSMUSG00000019841	19714	201	187	227	232	168	248.572	-0.66686	0.200144	-3.3319	0.000862562	0.00442048	DOWN
Elf1	ENSMUSG00000036461	13709	102	106	330	339	307	190.036	0.867254	0.199216	4.35334	1.34078e-05	0.000112501	UP
Vwa5a	ENSMUSG00000023186	67776	97	87	435	410	566	216.228	1.57771	0.224218	7.03648	1.97156e-12	6.17375e-11	UP
Vmac	ENSMUSG00000054723	106639	268	256	295	304	203	267.457	-0.746104	0.221026	-3.37563	0.000736456	0.00385513	DOWN
Vps33a	ENSMUSG00000029434	77573	171	113	441	400	324	230.748	0.689475	0.228818	3.01321	0.00258501	0.0112564	UP
Chchd3	ENSMUSG00000053768	66075	291	256	211	221	172	258.074	-1.21395	0.181556	-6.68635	2.28804e-11	6.10288e-10	DOWN
Nelfb	ENSMUSG00000013465	58202	140	131	387	353	433	220.761	0.751272	0.179612	4.18275	2.88e-05	0.000221474	UP
Cnp	ENSMUSG00000006782	12799	227	227	267	263	220	243.349	-0.639578	0.20838	-3.06929	0.00214566	0.00960393	DOWN
Rnf213	ENSMUSG00000070327	672511	286	167	210	257	147	220.07	-0.894071	0.256787	-3.48176	0.000498131	0.00275262	DOWN
Ehf	ENSMUSG00000012350	13661	92	81	453	320	406	183.071	1.40411	0.22398	6.2689	3.636e-10	7.95097e-09	UP
Ptk2	ENSMUSG00000022607	14083	130	124	342	299	369	206.619	0.627273	0.200594	3.12708	0.00176551	0.00815657	UP
Scyl2	ENSMUSG00000069539	213326	101	108	455	279	448	200.41	1.12367	0.2541	4.42217	9.77161e-06	8.49495e-05	UP
Aqp1	ENSMUSG00000004655	11826	146	95	277	338	325	193.288	0.621391	0.243129	2.55581	0.0105942	0.0366086	UP
Ptges3	ENSMUSG00000071072	56351	94	99	318	319	393	198.208	1.04969	0.242114	4.33552	1.45418e-05	0.000120978	UP
Slc33a1	ENSMUSG00000027822	11416	259	214	245	223	175	271.81	-0.913286	0.195417	-4.67351	2.96088e-06	2.90285e-05	DOWN
Ncoa4	ENSMUSG00000056234	27057	119	101	494	402	443	220.474	1.24507	0.185627	6.70736	1.98176e-11	5.3222e-10	UP
Lrpap1	ENSMUSG00000029103	16976	250	258	226	233	225	252.531	-0.935576	0.172109	-5.43594	5.45072e-08	7.68846e-07	DOWN
Tyro3	ENSMUSG00000027298	22174	76	74	425	401	432	206.585	1.70524	0.23459	7.26901	3.62126e-13	1.27126e-11	UP
Cpt2	ENSMUSG00000028607	12896	99	127	461	396	515	213.331	1.22263	0.29415	4.15647	3.23201e-05	0.00024458	UP
Hivep1	ENSMUSG00000021366	110521	136	105	399	350	439	186.002	0.945088	0.197478	4.78579	1.70319e-06	1.77424e-05	UP
Fuca2	ENSMUSG00000019810	66848	312	294	199	192	179	270.338	-1.45019	0.165658	-8.75412	2.05705e-18	1.55591e-16	DOWN
Smad1	ENSMUSG00000031681	17125	51	64	356	342	595	164.655	2.11636	0.285636	7.40929	1.26978e-13	4.8138e-12	UP
Tnfrsf21	ENSMUSG00000023915	94185	38	31	407	335	585	139.473	2.90443	0.339341	8.55903	1.13816e-17	7.99114e-16	UP
Zhx3	ENSMUSG00000035877	320799	136	121	439	346	441	216.172	0.890917	0.192628	4.62507	3.74463e-06	3.5925e-05	UP
Psmd11	ENSMUSG00000017428	69077	139	112	361	325	441	219.306	0.809085	0.21872	3.69919	0.000216293	0.0013177	UP
Map3k5	ENSMUSG00000071369	26408	109	113	346	246	386	197.333	0.767948	0.217757	3.52663	0.000420888	0.00237472	UP
Snx19	ENSMUSG00000031993	102607	132	132	407	319	372	231.752	0.689214	0.184098	3.74374	0.000181304	0.0011278	UP
Arl3	ENSMUSG00000025035	56350	249	279	238	255	250	255.07	-0.875611	0.195775	-4.47254	7.72977e-06	6.90782e-05	DOWN
Atg9a	ENSMUSG00000033124	245860	116	89	370	392	434	199.8	1.19215	0.23241	5.12951	2.90503e-07	3.51499e-06	UP
Hspe1	ENSMUSG00000073676	15528	229	208	248	185	223	242.148	-0.778633	0.193416	-4.02568	5.68106e-05	0.000405363	DOWN
Cyth2	ENSMUSG00000003269	19158	113	124	369	366	454	214.225	0.959366	0.19943	4.81055	1.50517e-06	1.59448e-05	UP
Ppp3cb	ENSMUSG00000021816	19056	274	251	218	232	244	258.848	-0.956992	0.165235	-5.79171	6.96723e-09	1.1896e-07	DOWN
Dusp1	ENSMUSG00000024190	19252	76	37	198	142	440	95.8841	1.44618	0.450387	3.21098	0.00132285	0.00638466	UP
Tle1	ENSMUSG00000008305	21885	91	83	354	411	228	196.029	1.15855	0.281961	4.10892	3.97511e-05	0.000294271	UP
Trio	ENSMUSG00000022263	223435	114	98	348	206	462	182.615	0.89281	0.276546	3.22843	0.00124472	0.00605026	UP
Micos10	ENSMUSG00000050608	433771	281	253	247	174	205	242.087	-1.13599	0.202394	-5.61275	1.99134e-08	3.12096e-07	DOWN
Tpcn1	ENSMUSG00000032741	252972	272	192	270	260	227	251.888	-0.642609	0.19492	-3.29678	0.00097801	0.00493639	DOWN
Pcca	ENSMUSG00000041650	110821	317	299	211	179	157	267.897	-1.53535	0.210772	-7.28443	3.23031e-13	1.14948e-11	DOWN
Ubald2	ENSMUSG00000050628	319370	53	49	327	206	713	156.251	2.2389	0.402549	5.56181	2.66998e-08	4.07262e-07	UP
Usp54	ENSMUSG00000034235	78787	88	64	463	346	540	167.594	1.79197	0.234585	7.6389	2.19082e-14	9.14712e-13	UP
Rraga	ENSMUSG00000070934	68441	121	123	377	320	406	222.076	0.809843	0.187836	4.31144	1.62198e-05	0.000133029	UP
Ppp4r2	ENSMUSG00000052144	232314	137	110	365	313	343	209.024	0.689589	0.173222	3.98095	6.86411e-05	0.000478927	UP
Tifa	ENSMUSG00000046688	211550	71	49	400	344	460	140.293	1.97683	0.65415	3.02199	0.00251118	0.0109856	UP
Insig2	ENSMUSG00000003721	72999	130	129	492	367	509	219.836	1.03251	0.196128	5.26445	1.40613e-07	1.81199e-06	UP
Uhrf2	ENSMUSG00000024817	109113	104	103	438	374	531	205.225	1.33166	0.200237	6.65041	2.92269e-11	7.66509e-10	UP
Micos13	ENSMUSG00000049760	224904	229	225	232	231	275	229.572	-0.663181	0.192368	-3.44746	0.000565876	0.00307209	DOWN
Ndufb5	ENSMUSG00000027673	66046	216	237	291	218	245	237.154	-0.638317	0.207164	-3.08122	0.00206155	0.00929389	DOWN
Ndufb8	ENSMUSG00000025204	67264	251	257	231	213	234	249.904	-0.949616	0.161308	-5.88696	3.93368e-09	6.97505e-08	DOWN
Abhd6	ENSMUSG00000025277	66082	106	94	432	316	510	193.215	1.28776	0.241149	5.34009	9.28987e-08	1.2453e-06	UP
Fundc1	ENSMUSG00000025040	72018	260	186	263	225	228	224.51	-0.668864	0.19664	-3.40147	0.000670253	0.00355252	DOWN
Tprkb	ENSMUSG00000054226	69786	289	250	295	259	220	260.79	-0.837085	0.189811	-4.4101	1.03321e-05	8.92772e-05	DOWN
Med14	ENSMUSG00000064127	26896	251	201	219	239	200	249.221	-0.810667	0.188153	-4.30854	1.64334e-05	0.00013457	DOWN
Rock2	ENSMUSG00000020580	19878	142	103	329	374	308	210.391	0.696755	0.198956	3.50206	0.000461676	0.00257473	UP
Prr14	ENSMUSG00000030822	233895	121	130	344	292	435	201.004	0.722669	0.219954	3.28555	0.00101785	0.00510783	UP
Edaradd	ENSMUSG00000095105	171211	266	290	278	215	156	267.312	-1.1494	0.251859	-4.56368	5.02637e-06	4.65668e-05	DOWN
Laptm4b	ENSMUSG00000022257	114128	122	118	279	279	370	207.305	0.587832	0.214883	2.73559	0.00622692	0.0236294	UP
Dab2ip	ENSMUSG00000026883	69601	115	96	324	235	521	178.585	0.991705	0.301173	3.29281	0.000991899	0.00500005	UP
Lmbr1l	ENSMUSG00000022999	74775	96	98	421	352	673	175.61	1.52755	0.276731	5.52	3.39002e-08	4.99788e-07	UP
Chd1	ENSMUSG00000023852	12648	109	85	294	265	432	174.96	0.995619	0.240907	4.13279	3.58381e-05	0.000268606	UP
Map2k4	ENSMUSG00000033352	26398	105	92	306	233	479	191.585	1.00429	0.278233	3.60954	0.000306746	0.0017934	UP
Rnf13	ENSMUSG00000036503	24017	267	256	284	237	198	245.595	-0.905475	0.198383	-4.56427	5.01236e-06	4.64645e-05	DOWN
Kdm5b	ENSMUSG00000042207	75605	112	83	444	391	430	188.161	1.34415	0.273571	4.91334	8.95382e-07	9.94961e-06	UP
Epn3	ENSMUSG00000010080	71889	42	44	400	388	686	164.954	2.73176	0.307613	8.88052	6.65496e-19	5.23602e-17	UP
Tox4	ENSMUSG00000016831	268741	124	112	324	257	357	194.669	0.627125	0.191255	3.27901	0.00104174	0.00521101	UP
Ippk	ENSMUSG00000021385	75678	125	111	463	325	714	206.894	1.30272	0.282172	4.61674	3.8981e-06	3.71696e-05	UP
Sh3bgrl	ENSMUSG00000031246	56726	309	233	200	204	172	249.101	-1.26295	0.188812	-6.68892	2.24817e-11	6.00675e-10	DOWN
Cars	ENSMUSG00000010755	27267	309	276	150	132	172	262.906	-1.72787	0.228125	-7.57423	3.61254e-14	1.46913e-12	DOWN
Pum1	ENSMUSG00000028580	80912	91	88	355	301	431	190.527	1.23689	0.217842	5.6779	1.36358e-08	2.2193e-07	UP
Csnk1e	ENSMUSG00000022433	27373	88	80	409	373	534	168.036	1.60732	0.227073	7.07844	1.45785e-12	4.67736e-11	UP
Atp5mpl	ENSMUSG00000021290	70257	254	208	209	221	258	223.22	-0.780606	0.204238	-3.82204	0.000132354	0.000856309	DOWN
Xpnpep1	ENSMUSG00000025027	170750	133	87	327	301	279	189.914	0.695192	0.209284	3.32177	0.000894498	0.00456491	UP
Tspo	ENSMUSG00000041736	12257	151	89	325	330	352	209.994	0.725242	0.201493	3.59935	0.000319017	0.00185682	UP
Pex19	ENSMUSG00000003464	19298	129	106	333	333	410	205.315	0.838233	0.190164	4.40795	1.04355e-05	9.00711e-05	UP
Atf7ip	ENSMUSG00000030213	54343	125	99	477	350	574	194.245	1.28425	0.261641	4.90844	9.18022e-07	1.01651e-05	UP
Cox7a2	ENSMUSG00000032330	12866	302	263	200	189	201	241.57	-1.29665	0.179249	-7.23379	4.69681e-13	1.62695e-11	DOWN
Smarca5	ENSMUSG00000031715	93762	107	87	310	276	294	201.242	0.823875	0.195681	4.21031	2.55021e-05	0.000198354	UP
Elof1	ENSMUSG00000013822	66126	234	206	267	227	251	243.098	-0.601348	0.172556	-3.48494	0.000492238	0.00272524	DOWN
Srek1	ENSMUSG00000032621	218543	305	256	261	221	187	248.316	-1.10434	0.182335	-6.05662	1.3901e-09	2.7172e-08	DOWN
Plxna1	ENSMUSG00000030084	18844	130	114	438	293	440	215.845	0.896966	0.215573	4.16084	3.17079e-05	0.000240629	UP
Chpf	ENSMUSG00000032997	74241	92	81	411	341	447	188.004	1.43056	0.267606	5.34577	9.0033e-08	1.21104e-06	UP
Serinc2	ENSMUSG00000023232	230779	107	106	367	289	497	183.527	1.06696	0.271985	3.92287	8.74987e-05	0.000592547	UP
Fitm2	ENSMUSG00000048486	228859	89	58	517	521	580	211.15	2.11116	0.214254	9.85352	6.61865e-23	7.50929e-21	UP
Slc11a2	ENSMUSG00000023030	18174	157	181	168	151	126	238.587	-0.976226	0.327737	-2.97869	0.00289483	0.0123972	DOWN
Pik3ap1	ENSMUSG00000025017	83490	196	176	133	118	167	215.059	-1.19377	0.190836	-6.25546	3.96343e-10	8.63079e-09	DOWN
Kras	ENSMUSG00000030265	16653	128	120	385	333	382	196.921	0.786098	0.179547	4.37823	1.19647e-05	0.0001017	UP
Armcx3	ENSMUSG00000049047	71703	262	226	251	228	174	255.177	-0.937893	0.208041	-4.50822	6.53744e-06	5.94061e-05	DOWN
Bicral	ENSMUSG00000036568	210982	119	106	297	298	519	191.46	0.94615	0.264787	3.57326	0.000352571	0.00202725	UP
Stap2	ENSMUSG00000038781	106766	158	114	357	334	357	215.043	0.593437	0.179762	3.30124	0.000962575	0.00486948	UP
Pip4p1	ENSMUSG00000035953	219024	131	107	336	379	412	203.757	0.889622	0.2158	4.12243	3.74894e-05	0.000279644	UP
Gpr161	ENSMUSG00000040836	240888	14	7	661	429	1033	160.742	5.30266	0.441722	12.0045	3.36474e-33	9.40745e-31	UP
Rab35	ENSMUSG00000029518	77407	92	69	436	355	513	189.721	1.66028	0.21345	7.77831	7.34976e-15	3.2785e-13	UP
Med15	ENSMUSG00000012114	94112	122	113	312	232	452	197.375	0.715867	0.254032	2.81801	0.0048322	0.0191103	UP
Ttc39a	ENSMUSG00000028555	230603	229	207	225	286	153	238.779	-0.745638	0.27325	-2.72877	0.00635702	0.0240125	DOWN
Smarce1	ENSMUSG00000037935	57376	143	102	331	245	383	194.645	0.612553	0.215501	2.84246	0.00447668	0.0179079	UP
Fnbp4	ENSMUSG00000008200	55935	239	196	230	281	229	209.751	-0.585032	0.189313	-3.09029	0.00199963	0.00905909	DOWN
Fnip1	ENSMUSG00000035992	216742	246	223	167	221	148	227.955	-1.16093	0.241897	-4.79927	1.59245e-06	1.66888e-05	DOWN
Inpp5b	ENSMUSG00000028894	16330	212	200	236	240	225	228.291	-0.594015	0.174836	-3.39756	0.000679891	0.0035963	DOWN
Fam160a2	ENSMUSG00000044465	74349	113	106	355	292	448	197.888	0.956599	0.215731	4.43422	9.24071e-06	8.10997e-05	UP
Trim33	ENSMUSG00000033014	94093	148	101	331	335	310	204.069	0.622326	0.196881	3.16093	0.00157266	0.0074166	UP
Dapk3	ENSMUSG00000034974	13144	136	107	307	298	331	205.481	0.590167	0.178406	3.308	0.000939649	0.0047751	UP
Triobp	ENSMUSG00000033088	110253	147	105	362	288	383	197.224	0.680507	0.206128	3.30138	0.00096209	0.0048686	UP
Ccdc9b	ENSMUSG00000045838	214239	120	115	403	427	554	200.047	1.19625	0.20955	5.70868	1.13858e-08	1.87255e-07	UP
Morf4l1	ENSMUSG00000062270	21761	157	61	416	307	347	189.661	0.968086	0.355702	2.72162	0.00649622	0.0244528	UP
Morf4l1b	ENSMUSG00000062270	627352	157	61	416	307	347	189.661	0.968086	0.355702	2.72162	0.00649622	0.0244528	UP
Ddx27	ENSMUSG00000017999	228889	127	108	356	254	332	203.873	0.640109	0.195307	3.27746	0.00104746	0.00522964	UP
Foxk1	ENSMUSG00000056493	17425	66	76	393	286	505	188.95	1.68439	0.258722	6.51044	7.4932e-11	1.84178e-09	UP
Timp2	ENSMUSG00000017466	21858	357	205	239	286	111	228.604	-1.15027	0.350952	-3.27758	0.001047	0.00522964	DOWN
Inhbb	ENSMUSG00000037035	16324	14	9	438	397	844	139.398	4.83472	0.474981	10.1788	2.46684e-24	3.27316e-22	UP
Kansl1	ENSMUSG00000018412	76719	135	108	347	319	302	197.293	0.63797	0.180033	3.54363	0.000394651	0.00224285	UP
Atxn2	ENSMUSG00000042605	20239	139	105	347	309	347	216.259	0.684026	0.176983	3.86492	0.000111124	0.000731653	UP
Ankrd16	ENSMUSG00000047909	320816	332	326	231	222	155	248.201	-1.47719	0.21777	-6.78326	1.17492e-11	3.2791e-10	DOWN
Myd88	ENSMUSG00000032508	17874	48	38	324	293	577	162.155	2.43641	0.345175	7.05847	1.68342e-12	5.35719e-11	UP
Rnf7	ENSMUSG00000051234	19823	211	200	209	204	251	225.403	-0.670789	0.192922	-3.47699	0.000507068	0.00279844	DOWN
Mul1	ENSMUSG00000041241	68350	91	80	307	225	604	175.683	1.36488	0.347173	3.93141	8.44496e-05	0.000573634	UP
Cables1	ENSMUSG00000040957	63955	95	87	458	449	453	203.554	1.54145	0.257734	5.98079	2.22054e-09	4.14386e-08	UP
Uhmk1	ENSMUSG00000026667	16589	125	120	337	230	423	184.921	0.644675	0.238367	2.70455	0.00683968	0.0255034	UP
Rhoc	ENSMUSG00000002233	11853	89	82	294	195	425	166.165	1.04875	0.304752	3.44133	0.000578861	0.00313715	UP
Ndufs6	ENSMUSG00000021606	407785	238	282	187	164	202	228.222	-1.28669	0.224301	-5.73645	9.6682e-09	1.61553e-07	DOWN
Rps6ka1	ENSMUSG00000003644	20111	138	100	356	286	336	180.569	0.683571	0.191375	3.57189	0.000354413	0.00203635	UP
Fam110c	ENSMUSG00000036136	104943	90	118	270	262	438	169.364	0.841614	0.315032	2.67152	0.00755089	0.0275997	UP
Mob4	ENSMUSG00000025979	19070	137	107	297	278	390	193.339	0.627746	0.228915	2.74227	0.00610162	0.0232271	UP
Mast2	ENSMUSG00000003810	17776	91	83	361	295	353	185.386	1.17265	0.211646	5.5406	3.01438e-08	4.52071e-07	UP
Erf	ENSMUSG00000040857	13875	118	117	260	286	397	172.301	0.640948	0.246737	2.5977	0.00938504	0.0331472	UP
Slc25a10	ENSMUSG00000025792	27376	223	219	166	224	144	243.864	-1.08411	0.233777	-4.63736	3.52887e-06	3.40639e-05	DOWN
Scfd1	ENSMUSG00000020952	76983	239	184	215	195	210	227.865	-0.802711	0.200882	-3.99593	6.44402e-05	0.000452236	DOWN
Cdcp1	ENSMUSG00000035498	109332	110	89	386	262	457	175.121	1.11035	0.284242	3.90634	9.37061e-05	0.000628602	UP
Tmem150a	ENSMUSG00000055912	232086	261	199	218	267	247	231.506	-0.678186	0.215391	-3.14863	0.0016404	0.0076668	DOWN
Rcan3	ENSMUSG00000059713	53902	143	100	414	367	374	183.606	0.897452	0.209684	4.28002	1.86881e-05	0.00015098	UP
Xylt2	ENSMUSG00000020868	217119	80	69	553	455	359	189.789	1.83766	0.30799	5.96662	2.42213e-09	4.47209e-08	UP
Prr13	ENSMUSG00000023048	66151	121	125	388	320	498	199.159	0.923789	0.227382	4.06273	4.85029e-05	0.00035305	UP
Usp46	ENSMUSG00000054814	69727	128	122	286	285	401	196.498	0.59602	0.209968	2.83863	0.00453083	0.018106	UP
Arid5a	ENSMUSG00000037447	214855	23	14	281	212	689	120.542	3.64413	0.52649	6.92155	4.46715e-12	1.31718e-10	UP
Mettl9	ENSMUSG00000030876	59052	316	251	148	120	185	235.42	-1.68187	0.207394	-8.10956	5.0803e-16	2.72405e-14	DOWN
Hras	ENSMUSG00000025499	15461	142	106	336	246	379	205.97	0.596283	0.229389	2.59944	0.00933767	0.0329976	UP
Ppp1r1b	ENSMUSG00000061718	19049	651	692	127	131	47	284.496	-3.50266	0.540188	-6.48415	8.92361e-11	2.14949e-09	DOWN
Pi4k2a	ENSMUSG00000025178	84095	113	100	353	330	436	190.643	1.03276	0.195462	5.28367	1.26619e-07	1.65759e-06	UP
Pla2g12a	ENSMUSG00000027999	66350	264	250	192	195	214	218.832	-1.13642	0.191939	-5.92071	3.2056e-09	5.77562e-08	DOWN
Mllt1	ENSMUSG00000024212	64144	114	108	337	375	267	210.172	0.783061	0.21509	3.64061	0.000271989	0.00161676	UP
Snx13	ENSMUSG00000020590	217463	99	97	329	279	306	199.198	0.856785	0.198784	4.31013	1.6316e-05	0.000133679	UP
Mfsd14b	ENSMUSG00000038212	66631	126	94	341	240	375	190.509	0.760636	0.214115	3.55247	0.000381634	0.00217915	UP
Zfp395	ENSMUSG00000034522	380912	313	270	183	218	104	228.178	-1.55821	0.299724	-5.19882	2.00558e-07	2.51613e-06	DOWN
Enpp5	ENSMUSG00000023960	83965	284	212	214	187	126	245.117	-1.2641	0.227063	-5.56717	2.58908e-08	3.96631e-07	DOWN
Rrp7a	ENSMUSG00000018040	74778	107	112	299	282	371	192.947	0.753586	0.20191	3.73229	0.000189748	0.00117287	UP
Trim16	ENSMUSG00000047821	94092	121	123	365	453	437	201.14	1.00209	0.238483	4.20194	2.64638e-05	0.000205324	UP
Trim50	ENSMUSG00000053388	215061	78	56	673	444	578	190.232	2.30308	0.318732	7.22576	4.98315e-13	1.71541e-11	UP
Polr3k	ENSMUSG00000038628	67005	327	316	165	162	76	270.336	-2.035	0.265481	-7.66534	1.78361e-14	7.56803e-13	DOWN
Gabra4	ENSMUSG00000029211	14397	290	255	117	143	86	254.977	-2.00856	0.284733	-7.05418	1.73625e-12	5.50293e-11	DOWN
Fbxo9	ENSMUSG00000001366	71538	265	179	182	217	135	243.969	-1.0749	0.235911	-4.55639	5.2041e-06	4.80145e-05	DOWN
Ammecr1l	ENSMUSG00000041915	225339	92	89	336	315	401	177.387	1.1759	0.202299	5.81269	6.14767e-09	1.0589e-07	UP
Ccl6	ENSMUSG00000018927	20305	56	20	308	249	527	172.278	2.50197	0.378056	6.61799	3.64116e-11	9.43869e-10	UP
Ascc1	ENSMUSG00000044475	69090	70	67	404	268	928	175.761	2.17277	0.393551	5.52093	3.3721e-08	4.97614e-07	UP
Il17rc	ENSMUSG00000030281	171095	124	88	331	373	282	188.97	0.871189	0.234203	3.7198	0.000199382	0.00122661	UP
Bhlhe40	ENSMUSG00000030103	20893	76	73	249	256	422	147.071	1.2724	0.426582	2.98278	0.0028564	0.0122729	UP
Gnas	ENSMUSG00000027523	14683	311	260	214	171	185	227.856	-1.36223	0.199802	-6.8179	9.23782e-12	2.62976e-10	DOWN
Rab9	ENSMUSG00000079316	56382	61	53	490	445	400	177.635	2.19094	0.287896	7.61019	2.73691e-14	1.13066e-12	UP
Nae1	ENSMUSG00000031878	234664	111	87	366	298	334	185.901	0.975703	0.200711	4.86124	1.16651e-06	1.2657e-05	UP
Socs2	ENSMUSG00000020027	216233	84	66	334	301	541	140.322	1.61313	0.329994	4.88837	1.01676e-06	1.11793e-05	UP
Gnai1	ENSMUSG00000057614	14677	310	273	121	99	108	235.065	-2.19105	0.177443	-12.3479	4.99892e-35	1.70148e-32	DOWN
Pitpnm1	ENSMUSG00000024851	18739	125	85	273	244	395	175.9	0.767156	0.251426	3.05122	0.00227916	0.0101147	UP
Wdyhv1	ENSMUSG00000022359	76773	225	209	235	275	229	230.868	-0.589726	0.212275	-2.77812	0.00546744	0.0211367	DOWN
Ppp4r1	ENSMUSG00000061950	70351	110	79	386	304	346	181.423	1.09916	0.209624	5.24349	1.57567e-07	2.01061e-06	UP
Tecr	ENSMUSG00000031708	106529	301	283	162	175	136	245.706	-1.66383	0.18975	-8.76854	1.80998e-18	1.37568e-16	DOWN
Pvr	ENSMUSG00000040511	52118	24	37	323	264	583	157.754	2.87703	0.373206	7.70896	1.26846e-14	5.47114e-13	UP
Pmpcb	ENSMUSG00000029017	73078	227	246	231	176	194	227.43	-1.02729	0.222903	-4.6087	4.05191e-06	3.84347e-05	DOWN
Ilf3	ENSMUSG00000032178	16201	275	255	192	178	209	228.891	-1.23485	0.176957	-6.97822	2.98936e-12	9.1059e-11	DOWN
Dctn4	ENSMUSG00000024603	67665	102	80	325	263	438	180.499	1.13596	0.243625	4.66275	3.12015e-06	3.04754e-05	UP
Tbl1xr1	ENSMUSG00000027630	81004	74	78	283	237	479	137.455	1.34486	0.291555	4.6127	3.97475e-06	3.78314e-05	UP
Gstz1	ENSMUSG00000021033	14874	241	235	241	211	188	232.868	-0.937173	0.17282	-5.42282	5.86655e-08	8.22315e-07	DOWN
Mpp5	ENSMUSG00000021112	56217	113	106	312	209	379	178.989	0.669793	0.250215	2.67687	0.00743132	0.0272679	UP
Creb3l1	ENSMUSG00000027230	26427	346	329	70	105	69	254.277	-2.82355	0.253044	-11.1583	6.52039e-29	1.30884e-26	DOWN
Zbtb42	ENSMUSG00000037638	382639	126	110	328	316	424	195.514	0.818161	0.246575	3.31811	0.0009063	0.00461612	UP
Tbccd1	ENSMUSG00000004462	70573	240	244	168	182	142	247.206	-1.33926	0.186956	-7.16347	7.86599e-13	2.60376e-11	DOWN
Tmem160	ENSMUSG00000019158	69094	220	274	173	173	211	222.277	-1.20297	0.238622	-5.04133	4.62305e-07	5.39367e-06	DOWN
Luzp1	ENSMUSG00000001089	269593	117	109	267	235	553	187.175	0.855784	0.322307	2.65518	0.00792659	0.0287683	UP
Plaa	ENSMUSG00000028577	18786	102	102	299	274	352	189.145	0.815793	0.208203	3.91825	8.91928e-05	0.000602455	UP
Macroh2a1	ENSMUSG00000015937	26914	122	93	323	262	350	174.428	0.763369	0.207226	3.68375	0.000229827	0.00139203	UP
Eid1	ENSMUSG00000091337	58521	207	196	181	235	131	228.445	-0.914121	0.252609	-3.61871	0.00029607	0.00174139	DOWN
Abcc10	ENSMUSG00000032842	224814	289	217	219	206	214	224.47	-1.0155	0.213204	-4.76307	1.90673e-06	1.95506e-05	DOWN
Bcor	ENSMUSG00000040363	71458	89	87	293	266	514	162.984	1.24071	0.279413	4.44042	8.9782e-06	7.90172e-05	UP
Agps	ENSMUSG00000042410	228061	127	97	374	270	352	185.362	0.793624	0.201081	3.94678	7.92078e-05	0.00054179	UP
Pim1	ENSMUSG00000024014	18712	81	69	298	321	582	144.325	1.64219	0.39887	4.11711	3.83658e-05	0.000284959	UP
Wdr43	ENSMUSG00000041057	72515	105	80	283	252	235	195.676	0.702039	0.190913	3.67728	0.000235734	0.00142341	UP
Rnps1	ENSMUSG00000034681	19826	109	94	293	296	314	169.568	0.795658	0.199106	3.99616	6.43787e-05	0.000452008	UP
Cblb	ENSMUSG00000022637	208650	51	56	343	282	351	118.496	1.82042	0.250919	7.25502	4.01615e-13	1.40359e-11	UP
Dhx32	ENSMUSG00000030986	101437	108	117	354	262	368	182.289	0.75637	0.222608	3.39777	0.000679382	0.00359604	UP
Eea1	ENSMUSG00000036499	216238	194	182	212	199	169	212.293	-0.73605	0.181941	-4.04554	5.22023e-05	0.000376304	DOWN
Sfxn2	ENSMUSG00000025036	94279	317	228	221	243	106	248.737	-1.27843	0.280171	-4.56305	5.04165e-06	4.66256e-05	DOWN
Tlnrd1	ENSMUSG00000070462	80889	79	65	334	271	472	171.301	1.54171	0.259357	5.94435	2.77553e-09	5.06373e-08	UP
Pick1	ENSMUSG00000068206	18693	267	230	225	298	236	225.718	-0.741103	0.211363	-3.50631	0.000454368	0.00254073	DOWN
Foxj3	ENSMUSG00000032998	230700	120	92	250	245	410	174.074	0.738516	0.250342	2.95003	0.00317746	0.0134168	UP
Ssh2	ENSMUSG00000037926	237860	75	67	437	283	473	162.893	1.70307	0.271817	6.26551	3.71597e-10	8.1145e-09	UP
Elf3	ENSMUSG00000003051	13710	44	33	298	342	467	142.95	2.49322	0.304194	8.19615	2.48214e-16	1.39293e-14	UP
0610040J01Rik	ENSMUSG00000060512	76261	74	69	232	199	300	135.433	0.989284	0.276709	3.57518	0.000349991	0.00201612	UP
Tmem258	ENSMUSG00000036372	69038	286	274	173	159	152	226.354	-1.57399	0.198754	-7.91927	2.38913e-15	1.14393e-13	DOWN
Zfp1	ENSMUSG00000055835	22640	69	51	437	249	558	156.939	2.01141	0.337287	5.9635	2.46885e-09	4.55298e-08	UP
Timm17b	ENSMUSG00000031158	21855	248	212	219	166	195	217.887	-1.02707	0.176266	-5.82683	5.649e-09	9.81647e-08	DOWN
Zfp36l1	ENSMUSG00000021127	12192	79	67	231	281	434	161.009	1.33956	0.301047	4.44967	8.60021e-06	7.59785e-05	UP
Lrrc8d	ENSMUSG00000046079	231549	107	96	328	279	373	179.692	0.908603	0.233252	3.89537	9.80497e-05	0.000654654	UP
Dnajb2	ENSMUSG00000026203	56812	113	129	351	340	344	205.719	0.728281	0.196741	3.70172	0.000214142	0.00130642	UP
Phrf1	ENSMUSG00000038611	101471	104	94	258	263	349	185.313	0.775339	0.213299	3.63499	0.000277992	0.00164868	UP
Slc26a9	ENSMUSG00000042268	320718	0	1	378	290	413	138.401	8.71173	1.44309	6.03685	1.57149e-09	3.04515e-08	UP
Opa1	ENSMUSG00000038084	74143	216	171	237	213	184	216.679	-0.64312	0.179736	-3.57814	0.000346046	0.00199498	DOWN
Tbrg4	ENSMUSG00000000384	21379	131	102	312	287	344	190.269	0.660891	0.184541	3.58128	0.000341918	0.0019747	UP
Kdm7a	ENSMUSG00000042599	338523	117	90	323	248	356	159.398	0.804359	0.215399	3.73428	0.000188253	0.00116547	UP
Tcf4	ENSMUSG00000053477	21413	200	188	231	219	162	203.762	-0.703546	0.200403	-3.51065	0.000447008	0.00250315	DOWN
Surf2	ENSMUSG00000014873	20931	221	199	204	258	149	228.093	-0.812339	0.235983	-3.44237	0.000576649	0.00312625	DOWN
Nfil3	ENSMUSG00000056749	18030	8	10	185	85	451	70.3148	3.93927	0.634337	6.21006	5.29652e-10	1.1252e-08	UP
Xab2	ENSMUSG00000019470	67439	96	118	317	241	348	176.332	0.705044	0.226069	3.11871	0.00181646	0.00833782	UP
Met	ENSMUSG00000009376	17295	104	94	322	325	246	172.214	0.815322	0.222111	3.67079	0.000241802	0.00145611	UP
Acox3	ENSMUSG00000029098	80911	146	103	382	406	305	209.233	0.786963	0.216822	3.62954	0.000283932	0.00167946	UP
Ftsj3	ENSMUSG00000020706	56095	106	67	271	220	301	183.562	0.843185	0.212593	3.96619	7.30293e-05	0.000505267	UP
Ndufb7	ENSMUSG00000033938	66916	223	228	167	161	208	218.158	-1.11813	0.231993	-4.81965	1.43809e-06	1.53067e-05	DOWN
Zfp579	ENSMUSG00000051550	68490	242	263	238	213	246	230.814	-0.90542	0.198224	-4.56765	4.93213e-06	4.58838e-05	DOWN
Ldlrap1	ENSMUSG00000037295	100017	125	87	338	261	345	189.512	0.799666	0.197173	4.05565	4.99947e-05	0.000362694	UP
Rffl	ENSMUSG00000020696	67338	109	56	326	278	500	161.158	1.40073	0.286996	4.88066	1.0573e-06	1.16006e-05	UP
Vps41	ENSMUSG00000041236	218035	204	158	221	192	184	211.606	-0.633656	0.174094	-3.63973	0.00027292	0.00162106	DOWN
Dync1li1	ENSMUSG00000032435	235661	110	102	307	261	323	177.694	0.708424	0.186067	3.80736	0.000140459	0.000901945	UP
Tmem9	ENSMUSG00000026411	66241	222	199	175	209	185	209.963	-0.921777	0.189755	-4.85771	1.18753e-06	1.28228e-05	DOWN
Xpo7	ENSMUSG00000022100	65246	209	175	258	218	157	212.669	-0.636734	0.216721	-2.93804	0.00330299	0.0138535	DOWN
Tgfbr2	ENSMUSG00000032440	21813	92	52	280	259	475	158.734	1.47097	0.285238	5.15699	2.50955e-07	3.08172e-06	UP
Htra2	ENSMUSG00000068329	64704	218	172	231	217	172	212.09	-0.685333	0.184315	-3.71827	0.000200589	0.00123307	DOWN
Rorc	ENSMUSG00000028150	19885	92	77	321	386	281	173.879	1.19638	0.303869	3.93716	8.24518e-05	0.000560794	UP
Sash1	ENSMUSG00000015305	70097	105	72	299	287	340	153.307	1.03704	0.238807	4.34257	1.40826e-05	0.00011747	UP
Irgq	ENSMUSG00000041037	210146	103	53	345	278	550	168.466	1.56782	0.293688	5.3384	9.37679e-08	1.25588e-06	UP
Hspa13	ENSMUSG00000032932	110920	222	212	158	116	124	232.788	-1.49141	0.201284	-7.40948	1.26798e-13	4.8138e-12	DOWN
Igsf23	ENSMUSG00000040498	70080	55	79	233	184	558	178.607	1.47302	0.438384	3.36011	0.000779102	0.00405128	UP
Hamp2	ENSMUSG00000056978	66438	233	215	168	189	72	231.409	-1.41723	0.342073	-4.14308	3.42671e-05	0.000257819	DOWN
Gtpbp4	ENSMUSG00000021149	69237	85	83	284	209	378	169.75	1.00491	0.261459	3.84349	0.000121297	0.000791313	UP
Zfp777	ENSMUSG00000071477	72306	111	105	313	290	334	176.455	0.754148	0.227002	3.32221	0.000893064	0.00455908	UP
Agfg1	ENSMUSG00000026159	15463	102	102	335	300	301	178.737	0.833182	0.21959	3.79426	0.000148086	0.000943265	UP
Snap29	ENSMUSG00000022765	67474	81	105	283	266	324	182.714	0.85637	0.226893	3.77433	0.00016044	0.00101209	UP
Ranbp9	ENSMUSG00000038546	56705	132	83	282	286	323	163.567	0.705375	0.22505	3.1343	0.00172266	0.00799633	UP
Ccnt1	ENSMUSG00000011960	12455	139	106	320	286	361	181.9	0.625355	0.210871	2.96558	0.00302114	0.0128538	UP
Fam114a1	ENSMUSG00000029185	68303	298	257	169	159	159	219.684	-1.54715	0.167731	-9.224	2.86227e-20	2.51767e-18	DOWN
Bscl2	ENSMUSG00000071657	14705	239	252	141	151	165	221.899	-1.46989	0.207372	-7.0882	1.35871e-12	4.39533e-11	DOWN
Ankrd54	ENSMUSG00000033055	223690	105	92	310	295	324	187.763	0.878305	0.214526	4.09417	4.23687e-05	0.000311879	UP
Ccdc117	ENSMUSG00000020482	104479	111	92	263	267	354	182.796	0.765589	0.236259	3.24046	0.00119336	0.00584439	UP
Tysnd1	ENSMUSG00000020087	71767	112	84	394	288	317	183.548	0.991774	0.212138	4.67514	2.93752e-06	2.88356e-05	UP
Timm23	ENSMUSG00000013701	53600	78	66	322	238	346	168.209	1.29064	0.241227	5.35031	8.78034e-08	1.1841e-06	UP
Mocs1	ENSMUSG00000064120	56738	74	63	431	337	449	169.968	1.78916	0.214942	8.32392	8.5102e-17	5.12478e-15	UP
Rbm26	ENSMUSG00000022119	74213	214	240	246	163	198	207.227	-0.957854	0.226558	-4.22785	2.35933e-05	0.000185163	DOWN
Habp2	ENSMUSG00000025075	226243	309	234	181	139	160	207.445	-1.53359	0.27638	-5.54885	2.87549e-08	4.34402e-07	DOWN
Nufip2	ENSMUSG00000037857	68564	98	110	291	219	626	172.263	1.07046	0.360824	2.96671	0.00301004	0.0128205	UP
Oplah	ENSMUSG00000022562	75475	74	33	350	325	462	148.412	2.07619	0.369031	5.62605	1.84388e-08	2.91361e-07	UP
Ptk2b	ENSMUSG00000059456	19229	112	81	312	272	449	170.795	1.0656	0.254811	4.18191	2.89065e-05	0.000222163	UP
Snx33	ENSMUSG00000032733	235406	149	120	320	335	414	195.926	0.635541	0.208028	3.05507	0.00225009	0.0100056	UP
Raph1	ENSMUSG00000026014	77300	34	51	472	306	566	150.002	2.59225	0.42186	6.1448	8.00622e-10	1.63433e-08	UP
Eif2s3y	ENSMUSG00000069049	26908	230	198	220	197	187	204.275	-0.86202	0.180398	-4.77843	1.76669e-06	1.83307e-05	DOWN
Acp6	ENSMUSG00000028093	66659	219	172	236	219	155	210.128	-0.711703	0.212547	-3.34844	0.00081267	0.00420453	DOWN
Ctnnd1	ENSMUSG00000034101	12388	109	81	379	307	467	186.576	1.24462	0.234919	5.29807	1.17031e-07	1.54238e-06	UP
Serinc5	ENSMUSG00000021703	218442	105	89	309	234	538	160.027	1.11393	0.310781	3.58431	0.000337974	0.00195553	UP
Gse1	ENSMUSG00000031822	382034	86	85	391	375	350	167.517	1.34441	0.194033	6.92878	4.24498e-12	1.26357e-10	UP
Rbfox2	ENSMUSG00000033565	93686	82	88	333	353	415	164.448	1.33015	0.225325	5.90328	3.56351e-09	6.37799e-08	UP
Bahd1	ENSMUSG00000040007	228536	72	59	455	338	429	164.291	1.86016	0.229041	8.12152	4.60376e-16	2.49415e-14	UP
Gsr	ENSMUSG00000031584	14782	91	69	227	201	347	170.553	0.919558	0.267292	3.44028	0.000581121	0.00314664	UP
Bicd2	ENSMUSG00000037933	76895	115	128	364	320	371	193.13	0.747979	0.217175	3.44413	0.000572899	0.00310699	UP
Iah1	ENSMUSG00000062054	67732	239	246	166	175	158	214.642	-1.32334	0.189345	-6.98906	2.76738e-12	8.51254e-11	DOWN
Erlec1	ENSMUSG00000020311	66753	315	310	104	154	115	224.935	-2.10217	0.224054	-9.38243	6.44682e-21	6.04418e-19	DOWN
Ppp4r3a	ENSMUSG00000041846	68734	122	102	280	307	312	183.149	0.649712	0.198206	3.27796	0.00104561	0.0052254	UP
Asah2	ENSMUSG00000024887	54447	202	195	222	219	157	212.652	-0.770435	0.198645	-3.87845	0.000105125	0.000695962	DOWN
Lfng	ENSMUSG00000029570	16848	380	285	110	242	58	237.436	-2.024	0.578542	-3.49845	0.000467964	0.00260837	DOWN
Plcb4	ENSMUSG00000039943	18798	204	201	236	244	179	202.252	-0.659353	0.210549	-3.13159	0.00173861	0.00805131	DOWN
Klf11	ENSMUSG00000020653	194655	76	48	399	299	459	127.898	1.87189	0.381183	4.91074	9.07341e-07	1.00611e-05	UP
Romo1	ENSMUSG00000067847	67067	206	215	231	159	240	199.566	-0.79256	0.267721	-2.9604	0.0030724	0.0130435	DOWN
Washc5	ENSMUSG00000022350	223593	209	172	191	228	187	205.043	-0.682717	0.19718	-3.4624	0.000535381	0.00293196	DOWN
Amigo1	ENSMUSG00000050947	229715	116	96	358	388	198	195.156	0.803893	0.314591	2.55536	0.010608	0.0366399	UP
Hnf1b	ENSMUSG00000020679	21410	233	170	201	225	195	209.56	-0.724573	0.19251	-3.76381	0.000167345	0.00105141	DOWN
Arrdc4	ENSMUSG00000042659	66412	66	42	345	299	316	140.481	1.80381	0.320832	5.62228	1.88451e-08	2.96541e-07	UP
Whrn	ENSMUSG00000039137	73750	228	182	213	235	226	207.582	-0.635947	0.176336	-3.60645	0.000310411	0.00181145	DOWN
Leprotl1	ENSMUSG00000031513	68192	104	100	304	276	336	173.327	0.802578	0.243009	3.30266	0.000957711	0.00485114	UP
Tab1	ENSMUSG00000022414	66513	127	119	374	289	403	185.076	0.749412	0.218819	3.42481	0.000615237	0.00330115	UP
Clk3	ENSMUSG00000032316	102414	135	98	351	334	281	181.419	0.700951	0.221313	3.16724	0.00153895	0.00727734	UP
Rbm10	ENSMUSG00000031060	236732	181	216	211	197	151	212.599	-0.878609	0.219541	-4.00202	6.2803e-05	0.000442931	DOWN
Tapbp	ENSMUSG00000024308	21356	247	158	190	205	217	195.403	-0.748257	0.204365	-3.66138	0.000250864	0.00150432	DOWN
Srprb	ENSMUSG00000032553	20818	167	184	175	176	196	208.398	-0.728011	0.195758	-3.71894	0.000200062	0.00123031	DOWN
Mphosph10	ENSMUSG00000030521	67973	87	91	261	232	290	175.575	0.770314	0.217428	3.54284	0.00039584	0.00224879	UP
Tnfaip1	ENSMUSG00000017615	21927	90	70	327	287	335	164.789	1.21153	0.209288	5.78881	7.08884e-09	1.2051e-07	UP
Gna12	ENSMUSG00000000149	14673	96	102	341	246	381	166.352	0.917357	0.231592	3.9611	7.46063e-05	0.000513907	UP
Mrps21	ENSMUSG00000054312	66292	232	270	203	158	160	214.758	-1.3225	0.242667	-5.44985	5.04126e-08	7.16902e-07	DOWN
Unc119b	ENSMUSG00000046562	106840	109	94	300	287	313	177.319	0.789947	0.22046	3.58317	0.000339452	0.00196335	UP
Pcbp4	ENSMUSG00000023495	59092	246	209	233	211	274	190.961	-0.701268	0.216515	-3.23888	0.00119999	0.00587316	DOWN
Shoc2	ENSMUSG00000024976	56392	90	94	285	212	312	169.355	0.765725	0.23713	3.22914	0.00124164	0.00603923	UP
Chchd10	ENSMUSG00000049422	103172	274	232	207	183	206	204.969	-1.12281	0.201881	-5.56171	2.67138e-08	4.07262e-07	DOWN
Gmppb	ENSMUSG00000070284	331026	215	197	153	136	162	212.723	-1.23209	0.209163	-5.89054	3.84924e-09	6.83306e-08	DOWN
Blcap	ENSMUSG00000067787	53619	124	123	316	232	520	183.89	0.740443	0.29301	2.52702	0.0115034	0.0392392	UP
Nol7	ENSMUSG00000063200	70078	207	193	199	199	226	204.9	-0.719849	0.186488	-3.86002	0.000113376	0.000745178	DOWN
G2e3	ENSMUSG00000035293	217558	49	62	326	240	539	154.697	1.93245	0.409573	4.71822	2.37918e-06	2.3971e-05	UP
Mon1a	ENSMUSG00000032583	72825	100	76	320	267	376	173.26	1.09498	0.230113	4.75842	1.9511e-06	1.99402e-05	UP
H2-T22	ENSMUSG00000056116	15039	207	157	188	197	205	201.952	-0.654915	0.202854	-3.22851	0.00124438	0.00605026	DOWN
H2-T9	ENSMUSG00000056116	15051	207	157	188	197	205	201.952	-0.654915	0.202854	-3.22851	0.00124438	0.00605026	DOWN
Hsd17b11	ENSMUSG00000029311	114664	105	60	328	432	249	176.061	1.28086	0.318354	4.02339	5.73675e-05	0.000408832	UP
Ggnbp1	ENSMUSG00000048731	70772	210	190	191	172	254	204.001	-0.737335	0.198417	-3.71608	0.000202339	0.00124236	DOWN
Sys1	ENSMUSG00000045503	66460	208	216	223	232	198	198.07	-0.741237	0.183916	-4.03031	5.57041e-05	0.000398064	DOWN
Magi3	ENSMUSG00000052539	99470	122	73	283	264	278	164.986	0.734922	0.214248	3.43025	0.000603036	0.00324793	UP
Carmil1	ENSMUSG00000021338	68732	52	50	384	323	389	121.259	2.06125	0.259986	7.92831	2.2214e-15	1.07679e-13	UP
Fam83h	ENSMUSG00000046761	105732	103	85	400	322	433	169.841	1.25867	0.200345	6.28253	3.33097e-10	7.3455e-09	UP
Aldh1a7	ENSMUSG00000024747	26358	307	231	121	163	126	209.197	-1.73677	0.279293	-6.21845	5.02103e-10	1.0725e-08	DOWN
Jak3	ENSMUSG00000031805	16453	89	48	322	271	411	163.53	1.52858	0.264861	5.77125	7.86877e-09	1.32617e-07	UP
Rab40c	ENSMUSG00000025730	224624	79	78	376	283	398	164.014	1.38287	0.246801	5.60316	2.10484e-08	3.28243e-07	UP
Cbl	ENSMUSG00000034342	12402	105	98	300	222	452	161.979	0.89427	0.268693	3.32822	0.000874024	0.00447063	UP
Stx1a	ENSMUSG00000007207	20907	42	24	324	219	770	164.516	2.96662	0.831486	3.56785	0.000359923	0.00206422	UP
Mcrip2	ENSMUSG00000025732	68241	220	239	145	131	110	218.281	-1.61911	0.219694	-7.36984	1.70832e-13	6.35324e-12	DOWN
Lcp1	ENSMUSG00000021998	18826	154	162	138	158	228	187.811	-0.636822	0.241163	-2.64063	0.00827517	0.0297849	DOWN
Myo1e	ENSMUSG00000032220	71602	56	74	246	173	390	141.011	1.25378	0.325497	3.8519	0.000117207	0.000767035	UP
Tor1a	ENSMUSG00000026849	30931	106	108	301	261	338	167.233	0.705331	0.217326	3.24549	0.00117247	0.00575829	UP
Rbpms	ENSMUSG00000031586	19663	55	50	269	257	573	127.784	2.0233	0.362918	5.57507	2.47428e-08	3.80923e-07	UP
Cops5	ENSMUSG00000025917	26754	122	81	300	228	303	171.48	0.679744	0.203546	3.33951	0.000839272	0.00431969	UP
Cxcl12	ENSMUSG00000061353	20315	300	320	101	88	87	239.702	-2.53656	0.186159	-13.6258	2.81269e-42	1.5728e-39	DOWN
Nras	ENSMUSG00000027852	18176	102	80	340	220	473	156.593	1.1421	0.296488	3.85211	0.000117104	0.000767035	UP
Cox15	ENSMUSG00000040018	226139	240	227	158	165	105	221.992	-1.48541	0.235236	-6.31455	2.70941e-10	6.05154e-09	DOWN
N4bp1	ENSMUSG00000031652	80750	95	103	266	271	255	165.01	0.635586	0.194057	3.27526	0.00105565	0.00525366	UP
Anks1	ENSMUSG00000024219	224650	113	75	280	248	244	175.376	0.687398	0.209385	3.28294	0.00102731	0.0051454	UP
Elk4	ENSMUSG00000026436	13714	88	76	344	289	449	152.703	1.35995	0.237992	5.71429	1.1016e-08	1.8213e-07	UP
Mpv17l2	ENSMUSG00000035559	234384	121	124	386	242	425	163.641	0.729648	0.242238	3.01212	0.00259433	0.0112894	UP
Tspan14	ENSMUSG00000037824	52588	96	83	344	207	462	153.685	1.13257	0.291834	3.88088	0.00010408	0.00068957	UP
Naxe	ENSMUSG00000028070	246703	184	202	207	170	179	194.792	-0.844374	0.197277	-4.28014	1.86779e-05	0.000150976	DOWN
Ripk4	ENSMUSG00000005251	72388	56	46	342	190	385	115.817	1.80131	0.353085	5.10164	3.36728e-07	4.02762e-06	UP
Tasor2	ENSMUSG00000033799	105203	121	81	308	204	316	165.933	0.679828	0.233993	2.90533	0.00366861	0.0151475	UP
Itgb5	ENSMUSG00000022817	16419	110	95	293	322	278	170.069	0.767608	0.201887	3.80216	0.000143439	0.000917788	UP
Chtf8	ENSMUSG00000046691	214987	95	96	331	269	261	188.189	0.806407	0.206648	3.90231	9.5278e-05	0.000638053	UP
Krt20	ENSMUSG00000035775	66809	68	24	328	374	191	163.591	1.96865	0.615113	3.20047	0.00137202	0.00658761	UP
Ethe1	ENSMUSG00000064254	66071	62	54	345	265	466	150.682	1.84931	0.288315	6.41419	1.41571e-10	3.31327e-09	UP
Hs2st1	ENSMUSG00000040151	23908	205	200	147	175	146	194.61	-1.15136	0.204883	-5.61961	1.9139e-08	3.00863e-07	DOWN
Hsf1	ENSMUSG00000022556	15499	114	96	255	307	265	180.897	0.62454	0.22105	2.82533	0.00472315	0.0187691	UP
Lrrc47	ENSMUSG00000029028	72946	98	96	268	252	335	167.087	0.775301	0.234362	3.30814	0.000939169	0.00477421	UP
Serpinh1	ENSMUSG00000070436	12406	85	87	248	232	206	175.017	0.631457	0.234756	2.68984	0.00714861	0.02641	UP
Ccdc141	ENSMUSG00000044033	545428	194	166	80	156	33	206.008	-1.75607	0.604774	-2.90368	0.003688	0.0152116	DOWN
Gmfb	ENSMUSG00000062014	63985	153	103	347	279	403	181.264	0.654813	0.223343	2.93187	0.00336926	0.0140899	UP
Atrn	ENSMUSG00000027312	11990	93	59	280	263	345	168.201	1.19666	0.219472	5.45244	4.96847e-08	7.09775e-07	UP
Gripap1	ENSMUSG00000031153	54645	215	159	193	207	211	199.061	-0.642135	0.19803	-3.24262	0.00118437	0.00580762	DOWN
Sh2d4a	ENSMUSG00000053886	72281	222	181	180	231	133	214.286	-0.915344	0.248536	-3.68294	0.000230559	0.00139484	DOWN
Samd1	ENSMUSG00000079003	666704	104	103	308	345	263	170.306	0.785383	0.307768	2.55187	0.0107147	0.0369027	UP
Ptgfrn	ENSMUSG00000027864	19221	104	62	301	197	302	168.695	0.917138	0.24913	3.68137	0.000231987	0.00140294	UP
Kdr	ENSMUSG00000062960	16542	171	257	212	185	264	197.527	-0.760634	0.257365	-2.95547	0.00312194	0.013218	DOWN
Smurf1	ENSMUSG00000038780	75788	126	88	309	267	334	172.61	0.73589	0.230931	3.18663	0.00143942	0.00687105	UP
Dusp8	ENSMUSG00000037887	18218	74	67	252	211	378	119.112	1.21137	0.370197	3.27222	0.00106707	0.00529542	UP
Ppp2r5b	ENSMUSG00000024777	225849	65	104	297	226	341	161.334	0.96654	0.258751	3.73541	0.00018741	0.00116117	UP
Dcaf1	ENSMUSG00000040325	321006	122	77	277	221	270	169.893	0.59739	0.206355	2.89496	0.0037921	0.0155794	UP
Stxbp3	ENSMUSG00000027882	20912	68	56	310	282	326	144.318	1.52991	0.207374	7.37755	1.61225e-13	6.01023e-12	UP
Nfkbib	ENSMUSG00000030595	18036	81	86	235	159	399	144.051	0.87105	0.352053	2.4742	0.0133534	0.044015	UP
Prcc	ENSMUSG00000004895	94315	119	95	286	281	305	176.873	0.671266	0.197828	3.39319	0.000690839	0.00364559	UP
Crebbp	ENSMUSG00000022521	12914	126	81	305	291	274	167.291	0.723213	0.198273	3.64756	0.000264739	0.00157785	UP
Crip2	ENSMUSG00000006356	68337	80	48	354	207	430	121.044	1.59884	0.302463	5.28607	1.24972e-07	1.63876e-06	UP
Parm1	ENSMUSG00000034981	231440	263	154	166	226	58	211	-1.21553	0.398295	-3.05183	0.00227448	0.0100968	DOWN
Stc2	ENSMUSG00000020303	20856	209	169	139	119	89	209.703	-1.47932	0.301158	-4.91211	9.01012e-07	1.00051e-05	DOWN
Elovl1	ENSMUSG00000006390	54325	100	85	265	271	271	165.159	0.768363	0.206539	3.72019	0.000199076	0.00122521	UP
Tvp23b	ENSMUSG00000014177	67510	202	184	219	190	187	201.947	-0.735099	0.184217	-3.99039	6.59657e-05	0.000461701	DOWN
Il4ra	ENSMUSG00000030748	16190	26	21	249	164	610	111.689	3.07819	0.467679	6.58183	4.64694e-11	1.1869e-09	UP
Cbfb	ENSMUSG00000031885	12400	121	102	306	258	313	160.08	0.615592	0.193097	3.18799	0.00143265	0.00684496	UP
Rnf149	ENSMUSG00000048234	67702	191	149	169	141	158	183.473	-0.89543	0.197998	-4.52242	6.11375e-06	5.57826e-05	DOWN
Usp43	ENSMUSG00000020905	216835	58	57	372	341	411	152.809	1.92575	0.225883	8.52545	1.52214e-17	1.04987e-15	UP
Aplp1	ENSMUSG00000006651	11803	190	194	202	254	169	193.947	-0.656983	0.253885	-2.58772	0.00966146	0.0339626	DOWN
Slc16a7	ENSMUSG00000020102	20503	229	241	175	142	137	207.863	-1.42058	0.269618	-5.26885	1.37279e-07	1.77488e-06	DOWN
Ptpn9	ENSMUSG00000032290	56294	93	85	307	200	350	150.405	0.89881	0.283928	3.16563	0.00154747	0.00731102	UP
Gnptab	ENSMUSG00000035311	432486	196	167	166	193	90	207.34	-1.04447	0.266779	-3.91511	9.0363e-05	0.000609469	DOWN
Ube2n	ENSMUSG00000074781	93765	86	79	274	218	332	165.968	0.955549	0.226234	4.22371	2.40311e-05	0.000188128	UP
Gxylt1	ENSMUSG00000036197	223827	91	65	264	207	438	139.358	1.18644	0.299099	3.96672	7.28686e-05	0.000504566	UP
Coq8b	ENSMUSG00000003762	76889	52	43	349	212	520	126.705	2.14182	0.343178	6.24113	4.34407e-10	9.35559e-09	UP
Dlg5	ENSMUSG00000021782	71228	90	79	383	337	340	165.301	1.28901	0.193755	6.65277	2.87622e-11	7.56856e-10	UP
Lactb2	ENSMUSG00000025937	212442	246	175	152	172	101	214.483	-1.33059	0.252573	-5.26815	1.37807e-07	1.77876e-06	DOWN
Parp1	ENSMUSG00000026496	11545	195	185	168	154	115	209.726	-1.16035	0.194191	-5.97534	2.29613e-09	4.26966e-08	DOWN
Kpna2	ENSMUSG00000018362	16647	46	47	272	202	323	150.273	1.73061	0.261956	6.60651	3.93486e-11	1.01496e-09	UP
Sh3yl1	ENSMUSG00000020669	24057	71	72	384	315	409	160.444	1.58638	0.249719	6.35265	2.11641e-10	4.81638e-09	UP
Eya3	ENSMUSG00000028886	14050	113	106	265	277	359	181.448	0.679278	0.223842	3.03463	0.0024083	0.0106097	UP
Mfsd4a	ENSMUSG00000059149	213006	219	212	231	203	231	183.197	-0.739501	0.207514	-3.56363	0.000365765	0.00209542	DOWN
Ufsp2	ENSMUSG00000031634	192169	220	258	129	115	131	207.134	-1.72397	0.215407	-8.0033	1.21127e-15	6.21796e-14	DOWN
Lrrc41	ENSMUSG00000028703	230654	106	92	267	241	352	155.909	0.757969	0.234298	3.23507	0.00121615	0.00593184	UP
BC031181	ENSMUSG00000036299	407819	201	157	210	188	186	192.632	-0.649051	0.19809	-3.27655	0.00105085	0.00523673	DOWN
Ndufa8	ENSMUSG00000026895	68375	179	180	198	186	197	187.033	-0.67093	0.217135	-3.08992	0.00200208	0.00906758	DOWN
Sorbs2	ENSMUSG00000031626	234214	203	155	167	198	117	196.304	-0.917867	0.244707	-3.75088	0.000176216	0.00110053	DOWN
Stub1	ENSMUSG00000039615	56424	223	157	169	200	205	187.899	-0.7512	0.221022	-3.39876	0.000676921	0.00358544	DOWN
Zfp64	ENSMUSG00000027551	22722	78	74	298	218	467	143.99	1.32389	0.300726	4.4023	1.07107e-05	9.20402e-05	UP
Bcl10	ENSMUSG00000028191	12042	68	59	296	214	358	153.45	1.40829	0.272626	5.16564	2.39613e-07	2.95636e-06	UP
Tk2	ENSMUSG00000035824	57813	188	197	220	195	227	197.922	-0.630756	0.208331	-3.02766	0.00246455	0.0108118	DOWN
S100a9	ENSMUSG00000056071	20202	3	4	78	19	778	67.4288	5.57187	1.52244	3.65983	0.000252386	0.00151171	UP
Nat8f1	ENSMUSG00000057103	66116	248	233	120	153	55	225.41	-1.90557	0.329079	-5.7906	7.01358e-09	1.1949e-07	DOWN
Rnf215	ENSMUSG00000003581	71673	108	117	322	304	300	178.257	0.674587	0.200103	3.3712	0.000748422	0.00390862	UP
Slc30a1	ENSMUSG00000037434	22782	152	145	133	109	151	176.58	-0.962727	0.322675	-2.98358	0.00284899	0.0122512	DOWN
Dbp	ENSMUSG00000059824	13170	404	619	7	28	4	258.24	-6.06815	0.981626	-6.18173	6.3402e-10	1.32182e-08	DOWN
Coro1c	ENSMUSG00000004530	23790	92	84	307	254	302	162.479	0.931134	0.197862	4.70597	2.5266e-06	2.51968e-05	UP
Gnptg	ENSMUSG00000035521	214505	230	198	141	138	191	197.521	-1.22413	0.2166	-5.65155	1.59005e-08	2.55014e-07	DOWN
Rev1	ENSMUSG00000026082	56210	246	231	207	198	112	207.34	-1.24413	0.254422	-4.89	1.00834e-06	1.10945e-05	DOWN
Ptprm	ENSMUSG00000033278	19274	83	72	225	236	345	152.507	1.01968	0.262651	3.88226	0.00010349	0.000686298	UP
Supt4a	ENSMUSG00000020485	20922	108	82	302	289	369	164.438	0.982723	0.235961	4.16476	3.11674e-05	0.00023758	UP
Fam120b	ENSMUSG00000014763	67544	112	105	306	252	287	186.241	0.59701	0.223696	2.66884	0.00761131	0.0277786	UP
Mrpl28	ENSMUSG00000024181	68611	210	189	162	179	191	193.709	-0.943408	0.195042	-4.83694	1.31852e-06	1.41108e-05	DOWN
Psd3	ENSMUSG00000030465	234353	75	43	298	225	341	124.803	1.52488	0.321819	4.73832	2.15499e-06	2.1867e-05	UP
Rrs1	ENSMUSG00000061024	59014	105	88	232	218	318	165.629	0.633554	0.226863	2.79268	0.00522738	0.0203595	UP
Pygo2	ENSMUSG00000047824	68911	102	103	268	239	316	169.896	0.639199	0.213539	2.99336	0.00275921	0.0119175	UP
Aldh1a1	ENSMUSG00000053279	11668	174	165	160	232	103	195.502	-0.805277	0.320413	-2.51325	0.0119626	0.0404881	DOWN
E030003E18Rik	ENSMUSG00000053279	320092	174	165	160	232	103	195.502	-0.805277	0.320413	-2.51325	0.0119626	0.0404881	DOWN
Bag3	ENSMUSG00000030847	29810	81	67	184	188	332	141.323	0.891688	0.285477	3.12351	0.00178709	0.00823681	UP
Cldn12	ENSMUSG00000046798	64945	101	97	291	244	299	165.5	0.709815	0.211572	3.35496	0.000793775	0.00411664	UP
Ndufa9	ENSMUSG00000000399	66108	222	209	180	158	159	201.554	-1.15804	0.223036	-5.19216	2.07864e-07	2.60154e-06	DOWN
Samd10	ENSMUSG00000038605	229011	122	91	305	294	278	181.918	0.689045	0.204573	3.36822	0.000756551	0.00394712	UP
Spred1	ENSMUSG00000027351	114715	95	60	242	185	288	143.749	0.85516	0.295871	2.89031	0.00384859	0.0157783	UP
Ppif	ENSMUSG00000021868	105675	214	159	184	173	230	183.82	-0.698665	0.233842	-2.98776	0.00281026	0.0121049	DOWN
Fh1	ENSMUSG00000026526	14194	212	176	195	146	173	190.796	-0.954841	0.198855	-4.8017	1.57321e-06	1.65199e-05	DOWN
Fis1	ENSMUSG00000019054	66437	190	159	194	181	215	183.583	-0.600508	0.197236	-3.04462	0.00232974	0.0103042	DOWN
Snhg1	ENSMUSG00000108414	83673	135	80	332	204	372	159.888	0.727677	0.287102	2.53456	0.011259	0.0385172	UP
Rbm22	ENSMUSG00000024604	66810	96	104	238	213	378	163.467	0.679906	0.269385	2.52392	0.0116056	0.0395019	UP
Fiz1	ENSMUSG00000061374	23877	107	92	272	232	358	176.683	0.753432	0.229511	3.28278	0.0010279	0.00514675	UP
Spred2	ENSMUSG00000045671	114716	68	43	239	185	329	123.568	1.41159	0.376283	3.75141	0.000175841	0.00109862	UP
Sh3bp4	ENSMUSG00000036206	98402	91	84	287	248	262	136.776	0.824912	0.221012	3.73244	0.000189635	0.00117264	UP
Cavin1	ENSMUSG00000004044	19285	205	146	234	191	138	183.113	-0.66934	0.247225	-2.70741	0.00678104	0.0253294	DOWN
Depp1	ENSMUSG00000048489	213393	9	31	290	188	699	127.824	3.44892	0.907161	3.80188	0.000143601	0.000918075	UP
H2-Q4	ENSMUSG00000035929	15015	180	132	154	170	197	148.417	-0.610394	0.216241	-2.82275	0.00476136	0.0188922	DOWN
Ndufb4	ENSMUSG00000022820	68194	212	195	183	127	171	189.033	-1.12519	0.199519	-5.63951	1.70537e-08	2.71904e-07	DOWN
Ndufb4c	ENSMUSG00000022820	100041273	212	195	183	127	171	189.033	-1.12519	0.199519	-5.63951	1.70537e-08	2.71904e-07	DOWN
Ndufb4b	ENSMUSG00000022820	100042503	212	195	183	127	171	189.033	-1.12519	0.199519	-5.63951	1.70537e-08	2.71904e-07	DOWN
Ndufs5	ENSMUSG00000028648	595136	205	182	169	181	174	187.952	-0.920588	0.195481	-4.70934	2.48516e-06	2.48627e-05	DOWN
Mthfsd	ENSMUSG00000031816	234814	186	198	221	249	135	204.713	-0.706929	0.249852	-2.82939	0.00466373	0.0185613	DOWN
Osmr	ENSMUSG00000022146	18414	43	37	302	197	514	122.546	2.2952	0.365822	6.27408	3.517e-10	7.70149e-09	UP
Metap1d	ENSMUSG00000041921	66559	189	170	135	165	182	186.258	-0.932282	0.204718	-4.55399	5.26378e-06	4.84795e-05	DOWN
Tgfbr1	ENSMUSG00000007613	21812	88	79	325	228	324	157.869	1.02718	0.230205	4.46199	8.12003e-06	7.2195e-05	UP
Vezt	ENSMUSG00000036099	215008	97	92	310	265	368	167.393	0.953684	0.257656	3.70138	0.00021443	0.00130737	UP
Dgcr6	ENSMUSG00000003531	13353	228	190	162	162	169	192.999	-1.11849	0.176212	-6.34743	2.18946e-10	4.96816e-09	DOWN
Npc1	ENSMUSG00000024413	18145	84	41	375	324	311	129.846	1.67457	0.270792	6.18398	6.25044e-10	1.30484e-08	UP
Rnf169	ENSMUSG00000058761	108937	75	57	329	282	332	142.976	1.47986	0.212903	6.95088	3.63004e-12	1.09089e-10	UP
Rab11fip1	ENSMUSG00000031488	75767	64	58	191	171	183	104.741	0.798307	0.254038	3.14247	0.00167526	0.00780642	UP
Nav1	ENSMUSG00000009418	215690	260	240	145	156	186	188.654	-1.39869	0.284595	-4.91465	8.89391e-07	9.90413e-06	DOWN
Mcc	ENSMUSG00000071856	328949	127	64	350	274	301	140.803	0.935108	0.254347	3.6765	0.000236453	0.00142719	UP
Fam160b2	ENSMUSG00000022095	239170	107	100	309	311	332	165.681	0.840975	0.194681	4.31977	1.56194e-05	0.000128828	UP
Crtc2	ENSMUSG00000027936	74343	102	92	281	228	334	152.407	0.755295	0.270505	2.79217	0.00523562	0.0203837	UP
Stx3	ENSMUSG00000041488	20908	65	62	273	217	373	140.698	1.398	0.256351	5.45343	4.94063e-08	7.07088e-07	UP
Pbx1	ENSMUSG00000052534	18514	154	133	150	168	149	155.614	-0.653372	0.205804	-3.17473	0.00149977	0.00711142	DOWN
Gab2	ENSMUSG00000004508	14389	52	36	253	168	436	109.987	1.92558	0.379876	5.06898	3.99959e-07	4.71548e-06	UP
Sema4d	ENSMUSG00000021451	20354	72	61	266	198	468	138.339	1.44431	0.326411	4.42482	9.65221e-06	8.4192e-05	UP
LOC115488166	ENSMUSG00000021451	115488166	72	61	266	198	468	138.339	1.44431	0.326411	4.42482	9.65221e-06	8.4192e-05	UP
Il17ra	ENSMUSG00000002897	16172	67	70	336	278	381	147.864	1.49301	0.223442	6.68187	2.35915e-11	6.27118e-10	UP
Bax	ENSMUSG00000003873	12028	84	59	305	236	344	156.907	1.27359	0.228157	5.58208	2.37658e-08	3.66963e-07	UP
Tnip1	ENSMUSG00000020400	57783	45	38	213	198	421	124.321	1.96403	0.421573	4.65881	3.18036e-06	3.09696e-05	UP
Aacs	ENSMUSG00000029482	78894	40	27	411	292	563	138.955	2.88306	0.350566	8.22401	1.96817e-16	1.12878e-14	UP
Paox	ENSMUSG00000025464	212503	98	104	284	273	256	155.167	0.64282	0.240057	2.67778	0.00741116	0.0272258	UP
Cln6	ENSMUSG00000032245	76524	317	290	103	112	103	209.743	-2.29187	0.229952	-9.96673	2.13131e-23	2.50902e-21	DOWN
Ndufv3	ENSMUSG00000024038	78330	246	253	129	107	137	193.646	-1.78953	0.243346	-7.35386	1.92569e-13	7.12778e-12	DOWN
Dhrs1	ENSMUSG00000002332	52585	213	219	145	159	115	198.319	-1.40733	0.254308	-5.53397	3.13064e-08	4.66823e-07	DOWN
Stxbp6	ENSMUSG00000046314	217517	163	144	120	161	121	189.436	-0.964616	0.214861	-4.4895	7.13908e-06	6.42025e-05	DOWN
Gsto1	ENSMUSG00000025068	14873	161	194	164	110	154	188.989	-1.10959	0.23427	-4.73638	2.1757e-06	2.20628e-05	DOWN
Asl	ENSMUSG00000025533	109900	165	184	202	182	190	176.809	-0.651512	0.18434	-3.53429	0.000408874	0.00231612	DOWN
Pnp	ENSMUSG00000115338	18950	36	20	453	349	498	144.38	3.18722	0.348271	9.15157	5.61141e-20	4.82735e-18	UP
Fads1	ENSMUSG00000010663	76267	283	332	132	123	75	204.927	-2.27048	0.242444	-9.36499	7.60582e-21	7.04641e-19	DOWN
Zbtb41	ENSMUSG00000033964	226470	72	91	236	190	325	152.809	0.826054	0.261677	3.15677	0.00159527	0.0074984	UP
Foxa3	ENSMUSG00000040891	15377	107	98	250	262	331	168.746	0.679559	0.25323	2.68356	0.00728426	0.0268289	UP
Nr0b2	ENSMUSG00000037583	23957	88	56	287	303	357	152.832	1.37331	0.34142	4.02235	5.76215e-05	0.000410455	UP
Elp5	ENSMUSG00000018565	54351	91	65	242	241	419	138.674	1.17887	0.274897	4.2884	1.79966e-05	0.000146223	UP
Slc30a2	ENSMUSG00000028836	230810	245	221	171	88	73	207.027	-1.86131	0.593596	-3.13566	0.0017147	0.00796649	DOWN
Pcyt2	ENSMUSG00000025137	68671	189	156	183	223	156	184.423	-0.647139	0.215928	-2.99701	0.00272643	0.0117987	DOWN
Cep120	ENSMUSG00000048799	225523	80	87	251	197	374	137.433	0.926142	0.27199	3.40506	0.000661495	0.00350967	UP
Cnot11	ENSMUSG00000003135	52846	104	75	272	211	274	143.704	0.724201	0.213256	3.39592	0.000683985	0.00361307	UP
Slc6a6	ENSMUSG00000030096	21366	171	186	140	205	167	173.537	-0.841414	0.257104	-3.27266	0.00106542	0.00529059	DOWN
Ap1g2	ENSMUSG00000040701	11766	170	182	213	167	203	184.741	-0.6429	0.202363	-3.17697	0.0014882	0.00706085	DOWN
Zfyve1	ENSMUSG00000042628	217695	102	94	332	249	459	148.977	1.04053	0.269572	3.85994	0.000113416	0.000745178	UP
Thap2	ENSMUSG00000020137	66816	93	77	269	237	174	178.48	0.643229	0.263569	2.44046	0.0146687	0.0476984	UP
Pik3r2	ENSMUSG00000031834	18709	224	195	148	139	137	193.146	-1.3418	0.234108	-5.73155	9.95154e-09	1.6611e-07	DOWN
Nrip1	ENSMUSG00000048490	268903	57	62	201	194	349	116.303	1.27472	0.291622	4.37113	1.23604e-05	0.000104553	UP
Bbc3	ENSMUSG00000002083	170770	57	63	378	311	480	140.988	1.91082	0.359454	5.3159	1.06134e-07	1.41064e-06	UP
Ssx2ip	ENSMUSG00000036825	99167	218	242	104	118	65	205.426	-2.04643	0.300226	-6.81629	9.34186e-12	2.64974e-10	DOWN
Mid2	ENSMUSG00000000266	23947	78	77	263	212	302	152.142	0.959009	0.229658	4.17582	2.9692e-05	0.000227663	UP
Rit1	ENSMUSG00000028057	19769	78	89	257	289	417	152.541	1.15886	0.263518	4.39764	1.09433e-05	9.38334e-05	UP
Arntl2	ENSMUSG00000040187	272322	223	245	135	193	167	199.43	-1.2824	0.268479	-4.77654	1.78341e-06	1.84624e-05	DOWN
Rogdi	ENSMUSG00000022540	66049	91	104	311	294	371	157.986	0.952856	0.241988	3.93761	8.22963e-05	0.00055998	UP
Rnf125	ENSMUSG00000033107	67664	25	9	250	105	716	88.3138	3.64484	1.14678	3.17832	0.00148132	0.00703671	UP
Stk35	ENSMUSG00000037885	67333	102	91	297	177	507	150.529	0.975325	0.342003	2.85181	0.00434715	0.017479	UP
Atraid	ENSMUSG00000013622	381629	166	155	164	207	174	183.268	-0.593217	0.202065	-2.93577	0.00332723	0.0139439	DOWN
Slu7	ENSMUSG00000020409	193116	96	96	259	212	301	156.38	0.640346	0.219928	2.91161	0.00359573	0.0148623	UP
Sav1	ENSMUSG00000021067	64010	88	79	280	216	309	138.279	0.904961	0.235239	3.84698	0.000119583	0.000781104	UP
Csad	ENSMUSG00000023044	246277	183	154	201	197	97	186.15	-0.799256	0.285403	-2.80045	0.00510319	0.0199452	DOWN
Exoc6b	ENSMUSG00000033769	75914	49	34	290	205	357	139.4	2.00131	0.27351	7.31713	2.53332e-13	9.22423e-12	UP
Snrpd2	ENSMUSG00000040824	107686	171	196	178	185	209	174.12	-0.73026	0.232171	-3.14535	0.00165888	0.00774161	DOWN
Rcl1	ENSMUSG00000024785	59028	89	72	247	235	282	146.222	0.889704	0.224476	3.96347	7.38666e-05	0.000510384	UP
Auh	ENSMUSG00000021460	11992	199	154	171	222	178	176.287	-0.654063	0.221014	-2.95937	0.00308272	0.0130767	DOWN
Sin3a	ENSMUSG00000042557	20466	100	67	242	180	334	139.75	0.824568	0.278704	2.95858	0.00309059	0.0130996	UP
Clip2	ENSMUSG00000063146	269713	58	47	236	165	304	120.196	1.38443	0.296571	4.66814	3.03932e-06	2.9723e-05	UP
Phax	ENSMUSG00000008301	56698	102	87	295	233	295	156.899	0.761075	0.203329	3.74306	0.00018179	0.00112938	UP
Ola1	ENSMUSG00000027108	67059	149	153	157	180	147	172.106	-0.681869	0.23746	-2.87151	0.00408515	0.0165816	DOWN
Oat	ENSMUSG00000030934	18242	208	164	156	146	120	167.788	-1.17178	0.244252	-4.79743	1.60715e-06	1.6809e-05	DOWN
Khk	ENSMUSG00000029162	16548	170	193	179	201	167	173.417	-0.775714	0.222063	-3.49321	0.000477256	0.00265732	DOWN
Vipr1	ENSMUSG00000032528	22354	226	152	87	128	73	193.397	-1.7279	0.363262	-4.75662	1.96866e-06	2.00934e-05	DOWN
Llgl1	ENSMUSG00000020536	16897	55	41	361	299	377	141.95	2.07613	0.251661	8.2497	1.58791e-16	9.3466e-15	UP
Abcc3	ENSMUSG00000020865	76408	52	64	303	210	496	132.759	1.73965	0.3337	5.21321	1.856e-07	2.33784e-06	UP
Gpsm1	ENSMUSG00000026930	67839	231	277	129	157	129	159.5	-1.6621	0.375822	-4.42257	9.75331e-06	8.48879e-05	DOWN
Dennd2d	ENSMUSG00000027901	72121	256	180	107	150	110	184.003	-1.59064	0.234263	-6.78999	1.12141e-11	3.14096e-10	DOWN
Slc44a3	ENSMUSG00000039865	213603	163	187	172	130	127	177.849	-1.08235	0.295712	-3.66013	0.000252084	0.00151106	DOWN
Maml1	ENSMUSG00000050567	103806	54	65	212	188	313	118.804	1.20929	0.278544	4.34147	1.41534e-05	0.000117997	UP
Pak1ip1	ENSMUSG00000038683	68083	101	74	276	198	243	151.324	0.676896	0.211087	3.20671	0.00134263	0.0064616	UP
Foxa2	ENSMUSG00000037025	15376	187	152	146	138	88	188.511	-1.21997	0.277154	-4.40179	1.07362e-05	9.2209e-05	DOWN
Raf1	ENSMUSG00000000441	110157	87	73	260	240	231	155.668	0.834179	0.225559	3.69827	0.000217075	0.00132195	UP
Tcp11l2	ENSMUSG00000020034	216198	97	92	231	259	282	148.151	0.670414	0.236541	2.83424	0.00459348	0.0183106	UP
Mea1	ENSMUSG00000002768	17256	183	136	198	162	184	170.025	-0.58511	0.183517	-3.18832	0.00143104	0.00683938	DOWN
Fads6	ENSMUSG00000044788	328035	230	218	111	123	95	194.29	-1.80525	0.207776	-8.68844	3.67436e-18	2.71365e-16	DOWN
Mcmbp	ENSMUSG00000048170	210711	94	92	265	233	282	161.512	0.703362	0.224488	3.13318	0.00172925	0.00801267	UP
Med24	ENSMUSG00000017210	23989	185	319	112	77	199	171.803	-1.77884	0.351123	-5.06616	4.05927e-07	4.77494e-06	DOWN
Atxn1l	ENSMUSG00000069895	52335	108	89	288	202	372	141.92	0.766343	0.2483	3.08636	0.00202626	0.00915062	UP
Cramp1l	ENSMUSG00000038002	57354	102	76	244	181	308	131.534	0.683767	0.24997	2.7354	0.00623053	0.023631	UP
F8a	ENSMUSG00000078317	14070	65	77	302	271	314	159.275	1.27384	0.214623	5.93523	2.9343e-09	5.31125e-08	UP
Tceal8	ENSMUSG00000051579	66684	187	128	164	152	203	175.753	-0.629636	0.220498	-2.85551	0.00429672	0.0173297	DOWN
Fat1	ENSMUSG00000070047	14107	84	55	305	208	224	145.851	1.05337	0.294037	3.58245	0.000340382	0.00196728	UP
Abhd5	ENSMUSG00000032540	67469	52	83	243	223	245	153.116	1.01648	0.249862	4.06817	4.73847e-05	0.000345875	UP
Heatr1	ENSMUSG00000050244	217995	49	56	194	174	221	135.833	1.11965	0.245822	4.55474	5.24508e-06	4.83527e-05	UP
Scaf8	ENSMUSG00000046201	106583	65	63	296	249	311	140.621	1.3762	0.263867	5.21551	1.83312e-07	2.31462e-06	UP
Cript	ENSMUSG00000024146	56724	85	81	267	232	341	147.861	0.974368	0.238589	4.08388	4.42904e-05	0.000325107	UP
Ccm2	ENSMUSG00000000378	216527	92	81	306	266	310	149.455	0.989063	0.223087	4.43352	9.27057e-06	8.12909e-05	UP
Ndufs4	ENSMUSG00000021764	17993	165	147	181	160	186	171.182	-0.604736	0.183294	-3.29926	0.000969399	0.00489925	DOWN
Chd7	ENSMUSG00000041235	320790	82	76	191	181	277	106.385	0.675168	0.278612	2.42333	0.0153789	0.0494531	UP
Foxj2	ENSMUSG00000003154	60611	114	83	286	232	360	154.28	0.800002	0.2226	3.59389	0.000325775	0.00189123	UP
Gab1	ENSMUSG00000031714	14388	96	66	276	248	253	136.024	0.911894	0.27951	3.26247	0.00110445	0.00546708	UP
Ccser2	ENSMUSG00000058690	72972	85	78	270	266	301	146.295	0.999965	0.22889	4.36875	1.24958e-05	0.00010547	UP
Ndufa3	ENSMUSG00000035674	66091	182	171	189	136	165	175.227	-0.893217	0.202138	-4.41885	9.9226e-06	8.61665e-05	DOWN
Slc25a42	ENSMUSG00000002346	73095	224	143	177	231	127	188.671	-0.792183	0.267109	-2.96577	0.00301925	0.0128492	DOWN
Pml	ENSMUSG00000036986	18854	194	178	142	173	151	178.067	-1.03188	0.242147	-4.26137	2.03175e-05	0.000162716	DOWN
Pum3	ENSMUSG00000041360	52874	82	101	273	222	267	151.379	0.682547	0.246289	2.77133	0.00558278	0.021503	UP
2021-03-02	ENSMUSG00000079557	224703	100	116	304	268	300	165.128	0.642858	0.203642	3.15681	0.00159504	0.0074984	UP
Ncbp1	ENSMUSG00000028330	433702	82	71	242	219	211	145.033	0.775956	0.205776	3.77089	0.000162669	0.00102491	UP
Vegfb	ENSMUSG00000024962	22340	295	247	72	85	106	195.677	-2.39895	0.204399	-11.7366	8.27483e-32	1.99321e-29	DOWN
Uaca	ENSMUSG00000034485	72565	162	210	160	169	126	177.546	-1.0835	0.23107	-4.68904	2.74491e-06	2.71663e-05	DOWN
Dock7	ENSMUSG00000028556	67299	198	145	195	165	131	177.914	-0.834999	0.20812	-4.0121	6.01812e-05	0.000426168	DOWN
Dpp7	ENSMUSG00000026958	83768	180	152	141	151	156	170.465	-0.923842	0.196997	-4.68962	2.73719e-06	2.71236e-05	DOWN
Rex1bd	ENSMUSG00000058833	66462	205	212	121	131	90	184.13	-1.64964	0.231373	-7.1298	1.00515e-12	3.28553e-11	DOWN
Nle1	ENSMUSG00000020692	217011	84	70	243	260	234	146.786	0.903765	0.214792	4.20762	2.58074e-05	0.000200429	UP
Jpt1	ENSMUSG00000020737	15374	88	54	222	194	297	126.555	0.979588	0.27311	3.58678	0.000334783	0.0019385	UP
Dpm3	ENSMUSG00000042737	68563	176	174	193	161	172	173.972	-0.77838	0.200103	-3.88989	0.000100291	0.000667908	DOWN
Sema3f	ENSMUSG00000034684	20350	38	50	289	203	455	115.194	2.04482	0.363482	5.62564	1.84819e-08	2.9141e-07	UP
Wdr48	ENSMUSG00000032512	67561	110	86	279	243	307	161.677	0.723486	0.208725	3.46621	0.000527845	0.00289676	UP
Slc25a44	ENSMUSG00000050144	229517	80	86	255	210	262	137.472	0.76128	0.241516	3.15209	0.00162104	0.00759673	UP
Tmem208	ENSMUSG00000014856	66320	178	160	175	139	219	165.641	-0.707324	0.242607	-2.91551	0.00355108	0.0147088	DOWN
Ndufs1	ENSMUSG00000025968	227197	208	184	164	163	128	174.083	-1.14302	0.201349	-5.67679	1.37249e-08	2.23148e-07	DOWN
BC024978	ENSMUSG00000078786	414069	49	58	168	147	312	99.7667	1.17506	0.34039	3.45209	0.000556252	0.00302719	UP
Tspan4	ENSMUSG00000025511	64540	53	64	177	180	243	132.723	0.988363	0.262948	3.75878	0.000170745	0.00106977	UP
Mfsd5	ENSMUSG00000045665	106073	69	78	283	231	275	145.599	1.0544	0.221326	4.76402	1.89772e-06	1.95092e-05	UP
[truncated: 2,173 more rows]

## Sheet: Table S3
Table S3 List of differentially expressed genes (DEGs) in adipose transcriptomics
SYMBOL	ENSEMBL	ENTREZID	CD1	CD2	CD3	AP1	AP2	AP3	baseMean	log2FoldChange	lfcSE	stat	pvalue	padj	label
2610203C22Rik	ENSMUSG00000079671	72481	102	121	149	54	62	50	80.5248	-0.744149	0.229435	-3.24339	0.00118114	0.00513385	Down
Gm6161	ENSMUSG00000081441	620542	53	42	89	24	18	12	24.9296	-1.32175	0.40597	-3.25579	0.00113078	0.00494773	Down
NA	ENSMUSG00000097893	NA	18	14	15	3	8	1	9.99769	-1.55778	0.60471	-2.57608	0.00999276	0.0315409	Down
Snhg6	ENSMUSG00000098234	73824	220	219	248	310	250	253	279.096	0.664951	0.135847	4.89485	9.83832e-07	9.71701e-06	Up
Prex2	ENSMUSG00000048960	109294	1308	995	1140	1155	1527	1261	1219.34	0.612885	0.124132	4.93737	7.91849e-07	7.98664e-06	Up
Msc	ENSMUSG00000025930	17681	49	48	56	13	17	6	30.3394	-1.67034	0.36945	-4.52115	6.15033e-06	5.0134e-05	Down
Rdh10	ENSMUSG00000025921	98711	543	340	527	1151	472	987	742.649	1.33661	0.283794	4.70979	2.47967e-06	2.23533e-05	Up
Ly96	ENSMUSG00000025779	17087	131	117	104	122	148	141	140.646	0.634067	0.20898	3.0341	0.00241255	0.00947969	Up
Paqr8	ENSMUSG00000025931	74229	86	55	81	114	97	104	96.5241	0.935046	0.199262	4.69256	2.69811e-06	2.40349e-05	Up
Tmem14a	ENSMUSG00000025933	75712	154	126	144	42	70	76	116.072	-0.754683	0.19743	-3.82253	0.000132089	0.000761541	Down
Gm4956	ENSMUSG00000025936	241041	26	18	18	3	9	4	11.5155	-1.54266	0.549367	-2.80806	0.00498407	0.0175321	Down
Rab23	ENSMUSG00000004768	19335	380	324	411	1336	595	1286	849.736	1.96575	0.268421	7.32338	2.41794e-13	8.24043e-12	Up
Bag2	ENSMUSG00000042215	213539	60	67	81	126	107	127	112.211	1.21552	0.233722	5.20073	1.98505e-07	2.30787e-06	Up
Imp4	ENSMUSG00000026127	27993	914	783	894	1131	965	1122	1044.39	0.735722	0.12023	6.1193	9.39863e-10	1.7181e-08	Up
Arhgef4	ENSMUSG00000037509	226970	82	57	74	40	24	22	48.4571	-0.879025	0.298549	-2.94432	0.00323666	0.0121837	Down
Neurl3	ENSMUSG00000047180	214854	366	518	381	94	123	123	376.165	-1.50365	0.309511	-4.85815	1.18486e-06	1.14469e-05	Down
Arid5a	ENSMUSG00000037447	214855	297	370	475	1451	1367	1008	851.16	2.1668	0.2128	10.1823	2.37882e-24	3.40842e-22	Up
Fer1l5	ENSMUSG00000037432	100534273	178	136	257	71	64	73	111.511	-1.0143	0.232034	-4.37135	1.2348e-05	9.38488e-05	Down
Lman2l	ENSMUSG00000001143	214895	1538	1305	1980	812	708	659	955.564	-0.711751	0.142108	-5.00852	5.48504e-07	5.7525e-06	Down
Sema4c	ENSMUSG00000026121	20353	565	725	857	754	1062	692	738.751	0.636229	0.215304	2.95503	0.00312642	0.0118283	Up
Zap70	ENSMUSG00000026117	22637	21	30	25	9	8	7	16.459	-1.25573	0.48006	-2.61578	0.00890244	0.0286234	Down
Cracdl	ENSMUSG00000026090	72097	146	96	238	68	67	28	111.045	-1.10573	0.422199	-2.61898	0.00881931	0.0283965	Down
Aff3	ENSMUSG00000037138	16764	198	195	236	12	30	30	133.814	-2.70766	0.228375	-11.8562	1.99835e-32	6.06842e-30	Down
Rnf149	ENSMUSG00000048234	67702	574	619	669	1430	1323	1488	1234.03	1.60503	0.228394	7.02744	2.10356e-12	6.25718e-11	Up
Creg2	ENSMUSG00000050967	263764	8	9	5	0	1	1	15.2305	-3.06611	1.25432	-2.44444	0.0145075	0.0431158	Down
Map4k4	ENSMUSG00000026074	26921	4790	4523	5128	8390	9354	9095	7313.86	1.31183	0.127907	10.2561	1.1111e-24	1.67455e-22	Up
Il1r2	ENSMUSG00000026073	16178	10	8	9	577	611	503	309.846	6.38951	0.395386	16.1602	9.62699e-59	1.63226e-55	Up
Gm16894	ENSMUSG00000097899	100047133	5	5	10	46	87	29	26.783	3.44105	0.629483	5.46647	4.59082e-08	6.07313e-07	Up
Il1r1	ENSMUSG00000026072	16177	1684	1039	1230	10068	11477	9502	6938.06	3.3954	0.20311	16.7171	9.84352e-63	2.00276e-59	Up
Il1rl2	ENSMUSG00000070942	107527	277	213	281	541	544	472	438.894	1.43978	0.146514	9.82686	8.6265e-23	1.05099e-20	Up
Il1rl1	ENSMUSG00000026069	17082	275	258	221	514	252	348	330.348	0.980331	0.284529	3.44545	0.000570109	0.00274024	Up
Il18rap	ENSMUSG00000026068	16174	106	109	86	166	183	172	143.962	1.19496	0.300124	3.98154	6.84709e-05	0.000427334	Up
Poglut2	ENSMUSG00000026047	72050	268	263	323	340	313	350	333.767	0.656056	0.132241	4.96105	7.01121e-07	7.1864e-06	Up
Col3a1	ENSMUSG00000026043	12825	35376	21523	36864	11523	14915	13303	27648	-0.80165	0.203523	-3.93887	8.18665e-05	0.000499297	Down
Col5a2	ENSMUSG00000026042	12832	3819	3158	3706	3711	4509	5312	5641.83	0.761845	0.215041	3.54278	0.000395932	0.00198953	Up
Wdr75	ENSMUSG00000025995	73674	703	690	752	862	745	869	793.872	0.627105	0.112788	5.56001	2.69753e-08	3.74634e-07	Up
Slc40a1	ENSMUSG00000025993	53945	270	532	334	62	64	190	311.704	-1.45767	0.433121	-3.36551	0.000764032	0.00352814	Down
Dnah7b	ENSMUSG00000041144	227058	42	39	37	8	9	9	46.6477	-1.76797	0.408577	-4.32713	1.51062e-05	0.000112541	Down
Slc39a10	ENSMUSG00000025986	227059	724	732	945	1866	2300	1796	1482.98	1.73293	0.145481	11.9118	1.02747e-32	3.21615e-30	Up
Gm8337	ENSMUSG00000100033	666869	12	17	12	18	33	18	16.9291	1.14858	0.458285	2.50626	0.0122014	0.0372861	Up
Tmeff2	ENSMUSG00000026109	56363	318	327	515	107	121	68	274.235	-1.54024	0.31094	-4.95351	7.28859e-07	7.43459e-06	Down
Cavin2	ENSMUSG00000045954	20324	20843	16725	20080	5512	9316	6547	12030.9	-1.017	0.165932	-6.12903	8.84175e-10	1.62067e-08	Down
Myo1b	ENSMUSG00000018417	17912	2075	1523	1673	1940	2986	2391	2105.45	0.886744	0.180947	4.90057	9.55604e-07	9.4704e-06	Up
Stat4	ENSMUSG00000062939	20849	21	31	34	11	10	8	21.6035	-1.1513	0.426854	-2.69717	0.00699313	0.0233288	Down
Stat1	ENSMUSG00000026104	20846	1296	2119	1288	896	662	671	1061.82	-0.690508	0.27663	-2.49614	0.0125552	0.0381664	Down
Inpp1	ENSMUSG00000026102	16329	781	716	812	365	477	281	520.577	-0.626337	0.166934	-3.75201	0.000175422	0.000977641	Down
1700019D03Rik	ENSMUSG00000043629	67080	75	77	74	14	40	18	53.7324	-1.24996	0.372066	-3.35952	0.000780774	0.00359566	Down
Ankrd44	ENSMUSG00000052331	329154	1415	1201	1157	500	833	524	921.265	-0.618584	0.189683	-3.26114	0.00110964	0.00486986	Down
Coq10b	ENSMUSG00000025981	67876	641	568	699	1235	848	1077	1000.44	1.15674	0.15356	7.53284	4.96474e-14	1.87407e-12	Up
Hspd1	ENSMUSG00000025980	15510	6457	5222	6221	8796	5896	6700	6553.16	0.685354	0.159888	4.28647	1.81534e-05	0.000132478	Up
Hspe1	ENSMUSG00000073676	15528	1516	1160	1597	1901	1535	1752	1633.67	0.712548	0.152104	4.68462	2.80478e-06	2.48221e-05	Up
Rftn2	ENSMUSG00000025978	74013	137	121	167	30	73	49	97.3234	-1.06392	0.254116	-4.18676	2.82971e-05	0.000196092	Down
Gm10561	ENSMUSG00000097649	628004	17	10	8	1	1	1	7.59881	-3.13037	1.00593	-3.11192	0.00185876	0.00757125	Down
Plcl1	ENSMUSG00000038349	227120	197	222	312	318	349	219	277.409	0.70202	0.237574	2.95496	0.00312713	0.0118283	Up
Spats2l	ENSMUSG00000038305	67198	133	173	222	68	78	77	127.592	-0.8215	0.204004	-4.02688	5.65228e-05	0.000361526	Down
Aox1	ENSMUSG00000063558	11761	5759	5464	6425	2109	2073	2254	3560.22	-1.03381	0.175259	-5.89878	3.662e-09	6.05257e-08	Down
Aox3	ENSMUSG00000064294	71724	281	315	442	28	44	40	155.606	-2.78843	0.370785	-7.52034	5.4636e-14	2.05097e-12	Down
Nif3l1	ENSMUSG00000026036	65102	413	336	429	508	521	557	493.624	0.854059	0.104452	8.17657	2.92032e-16	1.57605e-14	Up
Orc2	ENSMUSG00000026037	18393	653	519	611	667	719	835	712.188	0.739391	0.108823	6.79445	1.08729e-11	2.83617e-10	Up
Flacc1	ENSMUSG00000047528	108812	477	427	388	184	222	199	269.597	-0.686718	0.224712	-3.056	0.00224313	0.00890337	Down
Gm20257	ENSMUSG00000102059	100504501	542	403	517	144	153	120	254.983	-1.38536	0.19286	-7.18326	6.80674e-13	2.1741e-11	Down
Casp8	ENSMUSG00000026029	12370	1706	1714	1768	2080	2105	2731	2104.26	0.830617	0.136237	6.09685	1.08176e-09	1.96163e-08	Up
Trak2	ENSMUSG00000026028	70827	1792	1657	1820	2057	2462	2115	2066.05	0.747733	0.0888147	8.41902	3.79632e-17	2.3265e-15	Up
Mpp4	ENSMUSG00000079550	227157	70	53	49	6	9	7	39.2604	-2.55481	0.443831	-5.75627	8.59943e-09	1.32048e-07	Down
Fzd7	ENSMUSG00000041075	14369	560	548	813	314	250	185	465.947	-0.925769	0.227464	-4.06996	4.70206e-05	0.000306825	Down
Gm973	ENSMUSG00000047361	381260	9	11	7	1	0	0	33.2041	-4.24121	1.25264	-3.38582	0.000709648	0.00331767	Down
Nop58	ENSMUSG00000026020	55989	618	683	723	1893	1518	1676	1350.31	1.74799	0.137796	12.6854	7.12814e-37	3.29611e-34	Up
Wdr12	ENSMUSG00000026019	57750	391	327	346	699	590	660	550.26	1.29384	0.139767	9.25713	2.1e-20	1.93333e-18	Up
Carf	ENSMUSG00000026017	241066	365	319	476	174	212	177	267.884	-0.614198	0.16864	-3.64207	0.000270454	0.00142187	Down
Cd28	ENSMUSG00000026012	12487	36	47	41	1	9	9	26.6393	-2.30455	0.493936	-4.66568	3.07602e-06	2.6895e-05	Down
Pard3b	ENSMUSG00000052062	72823	571	500	730	298	314	272	413.102	-0.59729	0.138608	-4.30921	1.63836e-05	0.000120607	Down
Gpr1	ENSMUSG00000046856	241070	69	46	82	15	39	21	49.8754	-0.965164	0.395276	-2.44175	0.0146164	0.043376	Down
Ccnyl1	ENSMUSG00000070871	227210	864	708	813	918	934	943	898.776	0.650005	0.0960936	6.76429	1.33966e-11	3.43283e-10	Up
Fzd5	ENSMUSG00000045005	14367	316	252	351	166	149	112	217.497	-0.676988	0.194866	-3.47413	0.000512522	0.00249767	Down
Rpl10a-ps1	ENSMUSG00000084416	100043141	90	90	126	134	111	110	116.89	0.642952	0.196547	3.27124	0.00107077	0.00472376	Up
Akr1cl	ENSMUSG00000025955	70861	16	16	23	1	8	1	13.2387	-2.0502	0.831306	-2.46624	0.0136539	0.0409557	Down
Idh1	ENSMUSG00000025950	15926	6980	4860	6194	2891	2012	2391	3986.36	-0.873869	0.192416	-4.54155	5.58413e-06	4.58678e-05	Down
Map2	ENSMUSG00000015222	17756	40	40	39	7	20	14	30.7295	-1.12767	0.365933	-3.08163	0.00205873	0.00827146	Down
Myl1	ENSMUSG00000061816	17901	1437	1233	1002	445	689	550	780.175	-0.725214	0.252919	-2.86737	0.00413893	0.0149601	Down
Erbb4	ENSMUSG00000062209	13869	56	19	27	6	3	1	12.7738	-2.91461	0.700259	-4.16219	3.15205e-05	0.000214846	Down
Atic	ENSMUSG00000026192	108147	1302	1200	1418	1594	1278	1561	1514.99	0.602293	0.117971	5.10544	3.30018e-07	3.64723e-06	Up
Pecr	ENSMUSG00000026189	111175	550	357	615	199	225	204	305.934	-0.840007	0.175941	-4.77437	1.80267e-06	1.67858e-05	Down
Xrcc5	ENSMUSG00000026187	22596	310	266	377	445	466	319	363.997	0.794981	0.167678	4.74113	2.12532e-06	1.94628e-05	Up
Igfbp2	ENSMUSG00000039323	16008	208	102	309	58	71	38	118.543	-1.43142	0.494305	-2.89582	0.0037817	0.0138436	Down
Igfbp5	ENSMUSG00000026185	16011	9983	9296	14505	1483	1955	1606	6833.97	-2.3134	0.22752	-10.1679	2.75691e-24	3.92253e-22	Down
6030407O03Rik	ENSMUSG00000100301	109198	10	6	6	0	1	0	3.03051	-3.93595	1.38056	-2.85098	0.00435851	0.0156494	Down
Cxcr2	ENSMUSG00000026180	12765	3	7	17	299	206	287	163.098	5.32981	0.659805	8.07786	6.59136e-16	3.3527e-14	Up
Cxcr1	ENSMUSG00000048480	227288	0	1	1	8	4	9	3.60536	3.81667	1.53676	2.48358	0.0130069	0.0392814	Up
Cyp27a1	ENSMUSG00000026170	104086	1526	1663	1718	488	1009	586	1151.72	-0.835135	0.227133	-3.67686	0.000236122	0.00126691	Down
Ptprn	ENSMUSG00000026204	19275	2	8	3	19	12	23	20.9565	2.4442	0.736905	3.31684	0.000910402	0.00410347	Up
Inha	ENSMUSG00000032968	16322	32	26	37	9	9	7	21.4414	-1.49885	0.427442	-3.50657	0.000453929	0.00224384	Down
Slc4a3	ENSMUSG00000006576	20536	452	315	459	143	204	151	283.984	-0.873144	0.160957	-5.42469	5.80555e-08	7.53315e-07	Down
Farsb	ENSMUSG00000026245	23874	1204	1149	1322	1957	1601	1912	1605.28	0.996955	0.12368	8.06076	7.58187e-16	3.81834e-14	Up
Mogat1	ENSMUSG00000012187	68393	886	785	838	474	402	319	480.537	-0.652214	0.233179	-2.79706	0.00515705	0.0180626	Down
Irs1	ENSMUSG00000055980	16367	754	678	1015	245	266	264	427.603	-1.22775	0.135796	-9.04109	1.55123e-19	1.25243e-17	Down
Col4a4	ENSMUSG00000067158	12829	251	150	235	15	50	26	142.13	-2.38359	0.415305	-5.73937	9.50292e-09	1.45046e-07	Down
Col4a3	ENSMUSG00000079465	12828	94	41	97	6	24	18	61.5209	-1.83283	0.528139	-3.47034	0.000519792	0.00252584	Down
Agfg1	ENSMUSG00000026159	15463	1444	1303	1340	1886	1764	2102	1757.41	0.910417	0.110826	8.21482	2.1248e-16	1.17796e-14	Up
Spata3	ENSMUSG00000026226	70060	25	19	25	2	0	1	13.2049	-4.09393	0.960147	-4.26385	2.0093e-05	0.000144917	Down
2810459M11Rik	ENSMUSG00000026227	72792	276	157	284	26	4	22	87.8818	-3.32713	0.515585	-6.45312	1.09572e-10	2.3616e-09	Down
Ncl	ENSMUSG00000026234	17975	5119	5013	7056	9422	8322	9053	8119.76	1.07197	0.114345	9.37485	6.92723e-21	6.77603e-19	Up
Nppc	ENSMUSG00000026241	18159	1	0	0	3	3	4	5.63617	3.63658	1.42268	2.55614	0.0105841	0.0330586	Up
Efhd1	ENSMUSG00000026255	98363	253	340	388	65	47	69	228.159	-2.01702	0.317461	-6.35358	2.10355e-10	4.31006e-09	Down
Dgkd	ENSMUSG00000070738	227333	5472	4705	6893	1855	1645	1873	3365.65	-1.23366	0.130965	-9.41977	4.52074e-21	4.57509e-19	Down
Ugt1a7c	ENSMUSG00000090124	394432	632	427	820	322	262	254	431.083	-0.718292	0.213437	-3.36536	0.000764442	0.00352923	Down
Ugt1a6a	ENSMUSG00000054545	94284	87	81	87	15	26	14	43.2727	-1.80124	0.349649	-5.15158	2.58307e-07	2.92182e-06	Down
Mroh2a	ENSMUSG00000079429	100040766	373	313	622	128	76	78	213.482	-1.76168	0.285019	-6.18095	6.37188e-10	1.19266e-08	Down
A730008H23Rik	ENSMUSG00000044783	212427	2944	2182	3399	1363	1219	1323	2063.42	-0.68946	0.129154	-5.33829	9.38277e-08	1.15979e-06	Down
Hjurp	ENSMUSG00000044783	381280	2944	2182	3399	1363	1219	1323	2063.42	-0.68946	0.129154	-5.33829	9.38277e-08	1.15979e-06	Down
Sh3bp4	ENSMUSG00000036206	98402	779	631	1015	328	379	316	572.456	-0.81222	0.131765	-6.16417	7.08531e-10	1.31531e-08	Down
Agap1	ENSMUSG00000055013	347722	1323	1081	1997	594	476	553	1018.24	-0.992644	0.206484	-4.80737	1.5293e-06	1.44587e-05	Down
Lrrfip1	ENSMUSG00000026305	16978	1012	899	852	1772	1560	2130	1593.76	1.39846	0.196273	7.12507	1.04026e-12	3.23627e-11	Up
Ramp1	ENSMUSG00000034353	51801	90	67	98	15	13	17	73.402	-2.07092	0.346903	-5.96973	2.37649e-09	4.06661e-08	Down
Ube2f	ENSMUSG00000034343	67921	1016	885	1008	1062	1325	1281	1153.25	0.752587	0.0893612	8.42185	3.70598e-17	2.278e-15	Up
Erfe	ENSMUSG00000047443	227358	1	0	0	2	5	3	2.5143	3.62708	1.48348	2.44498	0.0144861	0.0430709	Up
Gpr35	ENSMUSG00000026271	64095	70	75	84	339	257	374	292.271	2.50594	0.365671	6.85299	7.23213e-12	1.93867e-10	Up
Kif1a	ENSMUSG00000014602	16560	14	11	21	33	33	32	37.6843	1.52103	0.327865	4.6392	3.49767e-06	3.02181e-05	Up
Hdlbp	ENSMUSG00000034088	110611	9719	8916	11328	11385	11191	13532	11910	0.695225	0.107197	6.48548	8.84476e-11	1.94336e-09	Up
Macir	ENSMUSG00000044768	52392	576	556	559	693	666	690	678.282	0.692011	0.147701	4.68522	2.79659e-06	2.47813e-05	Up
Pign	ENSMUSG00000056536	27392	678	619	702	771	764	773	751.813	0.627833	0.0887004	7.07813	1.46114e-12	4.45704e-11	Up
Gm7160	ENSMUSG00000099843	635504	117	101	110	26	55	38	62.4197	-1.0504	0.26364	-3.98421	6.7705e-05	0.000423108	Down
Bcl2	ENSMUSG00000057329	12043	654	691	763	733	961	752	676.222	0.627843	0.121316	5.17526	2.27591e-07	2.60771e-06	Up
Serpinb5	ENSMUSG00000067006	20724	1	0	1	12	1	9	5.36286	3.93278	1.57046	2.50422	0.0122722	0.037474	Up
Serpinb2	ENSMUSG00000062345	18788	58	98	49	559	1527	546	472.744	4.03962	0.498794	8.09878	5.55126e-16	2.85939e-14	Up
Serpinb8	ENSMUSG00000026315	20725	469	525	497	241	209	243	379.327	-0.69365	0.2403	-2.8866	0.00389425	0.0142121	Down
Nifk	ENSMUSG00000026377	67949	680	594	697	1186	1030	1305	999.946	1.26145	0.118916	10.6079	2.73695e-26	4.6405e-24	Up
Gli2	ENSMUSG00000048402	14633	203	158	247	30	57	37	125.155	-1.86659	0.273029	-6.83658	8.11033e-12	2.15703e-10	Down
Inhbb	ENSMUSG00000037035	16324	1127	1147	1118	2746	3919	3453	2367.4	1.98322	0.223808	8.86124	7.91298e-19	5.87582e-17	Up
Ptpn4	ENSMUSG00000026384	19258	1522	1594	2232	818	715	729	1096.43	-0.811017	0.193715	-4.18664	2.8311e-05	0.000196092	Down
Tmem37	ENSMUSG00000050777	170706	107	100	116	140	176	157	192.403	0.968047	0.264739	3.65661	0.000255574	0.00135414	Up
Steap3	ENSMUSG00000026389	68428	1555	1210	1286	628	615	714	1342.2	-0.630398	0.207159	-3.04307	0.00234179	0.00923553	Down
Ddx18	ENSMUSG00000001674	66942	877	848	1053	1277	1087	1208	1131.17	0.788191	0.0979685	8.04535	8.59974e-16	4.29903e-14	Up
Actr3	ENSMUSG00000026341	74117	4581	4224	4336	5100	4855	5688	5636.78	0.667708	0.211528	3.15659	0.00159626	0.00664265	Up
Slc35f5	ENSMUSG00000026342	74150	850	806	985	1021	1028	1083	1022.28	0.668928	0.098327	6.8031	1.02393e-11	2.67776e-10	Up
Lypd1	ENSMUSG00000026344	72585	71	40	78	10	9	10	23.3247	-2.26262	0.411077	-5.50415	3.70964e-08	4.98523e-07	Down
Map3k19	ENSMUSG00000051590	22625	41	64	138	26	21	15	50.7161	-1.52049	0.444081	-3.4239	0.000617295	0.00294025	Down
Ubxn4	ENSMUSG00000026353	67812	2722	2327	2857	3008	3019	2969	2967.4	0.609755	0.0660287	9.2347	2.59021e-20	2.34224e-18	Up
Thsd7b	ENSMUSG00000042581	210417	40	29	30	3	8	5	15.1347	-2.217	0.564806	-3.92524	8.66448e-05	0.000524691	Down
Pfkfb2	ENSMUSG00000026409	18640	326	241	340	153	160	132	203.556	-0.599977	0.131982	-4.54589	5.47045e-06	4.50432e-05	Down
Fcamr	ENSMUSG00000026415	64435	66	80	124	133	163	124	99.3276	1.0661	0.364705	2.92317	0.00346485	0.0128854	Up
Fcmr	ENSMUSG00000042474	69169	7	47	24	1	3	5	12.4166	-2.75612	0.882911	-3.12162	0.00179856	0.00735253	Down
Il19	ENSMUSG00000016524	329244	0	0	0	6	7	4	3.52664	5.35938	1.44593	3.70653	0.000210121	0.00114799	Up
Il10	ENSMUSG00000016529	16153	1	5	5	14	18	11	12.2806	2.37534	0.764857	3.1056	0.00189896	0.00770721	Up
Ikbke	ENSMUSG00000042349	56489	457	426	583	485	648	643	680.483	0.701578	0.267375	2.62395	0.00869164	0.0280442	Up
Slc41a1	ENSMUSG00000013275	98396	1026	902	1067	1886	1958	1707	1516.81	1.31092	0.0955231	13.7236	7.33361e-43	5.32892e-40	Up
Rab29	ENSMUSG00000026433	226422	480	407	403	738	894	980	786.924	1.43121	0.181038	7.90556	2.66725e-15	1.20328e-13	Up
Klhdc8a	ENSMUSG00000042115	213417	14	17	19	64	44	27	35.1841	1.85418	0.499878	3.70926	0.000207862	0.00113779	Up
Lrrn2	ENSMUSG00000026443	16980	94	119	120	45	40	37	110.7	-1.03293	0.20668	-4.99772	5.80135e-07	6.02831e-06	Down
Plekha6	ENSMUSG00000041757	240753	98	126	202	45	36	59	276.238	-1.16711	0.341595	-3.41665	0.00063396	0.00300736	Down
Atp2b4	ENSMUSG00000026463	381290	10067	8852	11707	4187	3992	4033	6550.16	-0.898874	0.193618	-4.64252	3.44193e-06	2.97745e-05	Down
Optc	ENSMUSG00000010311	269120	21	30	47	58	160	92	74.8205	2.07854	0.411747	5.0481	4.46217e-07	4.77075e-06	Up
Prelp	ENSMUSG00000041577	116847	10961	16725	10513	19060	39561	33238	30121.8	1.64172	0.296414	5.5386	3.04893e-08	4.17735e-07	Up
Chil1	ENSMUSG00000064246	12654	42	13	35	123	257	129	103.047	2.93881	0.56694	5.18364	2.176e-07	2.50554e-06	Up
Ppp1r12b	ENSMUSG00000073557	329251	1598	1175	1844	477	886	360	919.187	-0.999962	0.273281	-3.65909	0.000253109	0.00134419	Down
Ptprv	ENSMUSG00000097993	13924	26	18	27	5	4	8	14.5212	-1.62921	0.554017	-2.94072	0.00327449	0.0123102	Down
Gm4204	ENSMUSG00000079139	100043064	590	812	907	820	1040	983	963.591	0.712673	0.190481	3.74143	0.000182976	0.00101412	Up
Lmod1	ENSMUSG00000048096	93689	254	229	308	64	169	108	165.414	-0.799176	0.296106	-2.69895	0.0069558	0.0232271	Down
Shisa4	ENSMUSG00000041889	77552	65	79	96	152	177	157	113.698	1.43709	0.257566	5.57949	2.41231e-08	3.39425e-07	Up
Igfn1	ENSMUSG00000051985	226438	10	3	16	0	0	0	14.8633	-5.2486	1.36255	-3.85205	0.000117132	0.000686214	Down
Kif21b	ENSMUSG00000041642	16565	286	335	321	83	143	130	286.389	-1.00008	0.278054	-3.5967	0.000322284	0.00165921	Down
Inava	ENSMUSG00000041605	67313	1	2	0	11	1	15	16.0159	3.58042	1.12567	3.1807	0.00146922	0.00617618	Up
9230116N13Rik	ENSMUSG00000097403	320054	59	62	68	24	17	23	33.6009	-1.14148	0.300051	-3.80429	0.00014221	0.000813441	Down
Zfp281	ENSMUSG00000041483	226442	490	483	536	706	646	627	634.898	0.810666	0.120959	6.70199	2.05606e-11	5.05835e-10	Up
Nek7	ENSMUSG00000026393	59125	3334	3210	3893	3906	6572	4068	4047.96	0.891374	0.161619	5.51527	3.48252e-08	4.71113e-07	Up
B3galt2	ENSMUSG00000033849	26878	13941	13248	21448	2871	365	3195	6763.05	-2.46028	0.650265	-3.7835	0.000154637	0.000874199	Down
Rgs2	ENSMUSG00000026360	19735	996	577	1288	150	345	118	466.922	-1.78792	0.445607	-4.01232	6.01251e-05	0.000380917	Down
Ptgs2	ENSMUSG00000032487	19225	53	23	62	441	260	191	235.64	3.15259	0.445876	7.07056	1.54311e-12	4.67205e-11	Up
Prg4	ENSMUSG00000006014	96875	905	1112	1228	3905	1189	5803	3574.31	2.17973	0.47247	4.61347	3.95993e-06	3.36826e-05	Up
Hmcn1	ENSMUSG00000066842	545370	154	88	132	39	41	19	113.215	-1.48742	0.3798	-3.91632	8.99125e-05	0.000541551	Down
Niban1	ENSMUSG00000026483	63913	1645	1558	1858	425	714	531	1251.68	-1.18585	0.18767	-6.3188	2.63601e-10	5.33124e-09	Down
2810414N06Rik	ENSMUSG00000100594	102640772	295	256	355	113	86	117	184.498	-1.08934	0.155464	-7.00707	2.43353e-12	7.16536e-11	Down
Rgl1	ENSMUSG00000026482	19731	2285	2625	2776	4030	3496	4822	3460.51	1.10151	0.15756	6.99103	2.72873e-12	7.97684e-11	Up
Lamc2	ENSMUSG00000026479	16782	81	99	103	233	325	134	181.48	1.69478	0.31902	5.31246	1.08153e-07	1.31607e-06	Up
Npl	ENSMUSG00000042684	74091	133	130	130	226	172	515	269.434	1.63843	0.357081	4.5884	4.46654e-06	3.75676e-05	Up
Rgs16	ENSMUSG00000026475	19734	57	56	75	295	140	438	295.017	2.65377	0.354542	7.48507	7.1507e-14	2.65006e-12	Up
Glul	ENSMUSG00000026473	14645	51883	29341	48770	59888	53449	46406	44230.6	0.737398	0.176809	4.17059	3.03813e-05	0.000208408	Up
Ier5	ENSMUSG00000056708	15939	430	579	565	1426	937	1301	983.328	1.63418	0.30569	5.34587	8.9982e-08	1.11701e-06	Up
Qsox1	ENSMUSG00000033684	104009	3374	3029	3860	6132	5964	6253	4774.46	1.26389	0.18693	6.76128	1.36775e-11	3.48725e-10	Up
Ralgps2	ENSMUSG00000026594	78255	197	239	234	47	98	65	152.995	-1.27173	0.262917	-4.83699	1.31821e-06	1.26272e-05	Down
2810025M15Rik	ENSMUSG00000049881	69953	223	177	244	210	293	250	227.44	0.649319	0.134924	4.81247	1.49076e-06	1.41403e-05	Up
Sec16b	ENSMUSG00000026589	89867	1120	1202	1517	342	372	365	756.091	-1.40875	0.161438	-8.72629	2.63153e-18	1.85907e-16	Down
Cacybp	ENSMUSG00000014226	12301	1014	917	1041	1076	1036	1260	1174.61	0.603449	0.147504	4.09106	4.29405e-05	0.000283107	Up
Gas5	ENSMUSG00000053332	14455	1258	1307	1813	1899	1736	1579	1719.64	0.68083	0.134841	5.04912	4.43846e-07	4.75289e-06	Up
Prdx6	ENSMUSG00000026701	11758	10400	7505	7446	10555	18939	9687	10763.7	1.03214	0.245263	4.20828	2.57318e-05	0.000180593	Up
Tnfsf18	ENSMUSG00000066755	240873	3	1	1	6	7	9	7.75348	2.56073	0.859023	2.98097	0.00287334	0.0110054	Up
Eef1aknmt	ENSMUSG00000026694	71449	332	249	324	414	385	342	354.87	0.760319	0.120094	6.33103	2.43523e-10	4.95472e-09	Up
Fmo4	ENSMUSG00000026692	226564	107	61	132	45	46	25	50.7308	-0.925811	0.372691	-2.48413	0.012987	0.0392445	Down
Sele	ENSMUSG00000026582	20339	5	10	14	313	37	166	102.068	4.60255	0.710147	6.48112	9.10445e-11	1.98968e-09	Up
Sell	ENSMUSG00000026581	20343	82	254	103	681	317	562	396.228	2.19579	0.504745	4.3503	1.3595e-05	0.000102219	Up
Selp	ENSMUSG00000026580	20344	225	234	274	1492	761	1177	709.661	2.65618	0.270585	9.81644	9.56649e-23	1.15857e-20	Up
F5	ENSMUSG00000026579	14067	182	282	257	82	72	76	143.677	-1.24276	0.383862	-3.23752	0.00120574	0.00521737	Down
Atp1b1	ENSMUSG00000026576	11931	557	281	801	223	163	130	609.165	-1.20173	0.451183	-2.6635	0.00773331	0.0254269	Down
Gm20743	ENSMUSG00000104117	433374	19	21	30	0	3	3	16.1888	-3.11993	0.700477	-4.45401	8.42818e-06	6.65682e-05	Down
Adcy10	ENSMUSG00000026567	271639	34	29	20	3	3	8	15.0933	-2.16142	0.617179	-3.5021	0.000461611	0.00227739	Down
Cd247	ENSMUSG00000005763	12503	150	107	98	38	41	38	78.059	-1.18847	0.349036	-3.40501	0.000661622	0.00312256	Down
Fam78b	ENSMUSG00000060568	226610	219	291	213	592	405	834	494.295	1.74473	0.2815	6.19797	5.71966e-10	1.08759e-08	Up
Uck2	ENSMUSG00000026558	80914	406	422	478	1700	1372	1548	1074.56	2.24465	0.176775	12.6978	6.08367e-37	2.87857e-34	Up
Rxrg	ENSMUSG00000015843	20183	580	421	428	67	54	36	239.887	-2.76859	0.287169	-9.64097	5.36798e-22	6.17045e-20	Down
Hsd17b7	ENSMUSG00000026675	15490	224	207	244	350	275	432	375.149	1.07318	0.198612	5.40342	6.53834e-08	8.40891e-07	Up
3110045C21Rik	ENSMUSG00000097503	67303	23	12	8	26	32	32	30.2139	1.4797	0.391409	3.78045	0.000156547	0.000883649	Up
Uap1	ENSMUSG00000026670	107652	2973	3627	4672	20668	5620	21344	12641.8	2.52012	0.38552	6.53695	6.27866e-11	1.41011e-09	Up
Gm7694	ENSMUSG00000102752	665574	204	210	258	478	987	438	498.025	1.90952	0.292688	6.5241	6.84117e-11	1.52917e-09	Up
Nos1ap	ENSMUSG00000038473	70729	76	67	102	120	282	146	136.759	1.57948	0.30996	5.09575	3.47365e-07	3.82647e-06	Up
Olfml2b	ENSMUSG00000038463	320078	703	408	926	182	216	144	386.408	-1.46206	0.2418	-6.04657	1.47964e-09	2.62924e-08	Down
Fcrlb	ENSMUSG00000070524	435653	9	8	7	7	38	36	17.5769	2.15616	0.650454	3.31485	0.000916908	0.00412639	Up
Fcrla	ENSMUSG00000038421	98752	28	70	21	6	9	9	21.5397	-1.9596	0.622688	-3.14701	0.0016495	0.00682685	Down
Fcgr2b	ENSMUSG00000026656	14130	1572	1759	1568	1467	2379	2854	2171.18	0.85423	0.23643	3.61304	0.000302629	0.00156954	Up
Mpz	ENSMUSG00000056569	17528	31	19	19	5	4	2	12.0845	-2.23015	0.597787	-3.73068	0.000190964	0.00105351	Down
Pcp4l1	ENSMUSG00000038370	66425	95	86	111	27	42	9	124.069	-1.49062	0.466798	-3.1933	0.00140659	0.00594732	Down
Fcer1g	ENSMUSG00000058715	14127	1193	1194	1116	1524	1647	2074	1821.17	0.992644	0.293706	3.37972	0.000725589	0.00337979	Up
Adamts4	ENSMUSG00000006403	240913	142	253	308	1472	2374	2395	1126.27	3.56378	0.292384	12.1887	3.57163e-34	1.2529e-31	Up
Cd244a	ENSMUSG00000004709	18106	67	65	53	169	75	160	106.467	1.54446	0.444907	3.47143	0.000517703	0.00251869	Up
Atp1a4	ENSMUSG00000007107	27222	18	23	7	27	43	27	52.8541	1.39152	0.478396	2.90872	0.00362914	0.0133572	Up
Igsf8	ENSMUSG00000038034	140559	751	561	808	1061	1082	1114	1069.91	1.05064	0.156391	6.718	1.84232e-11	4.56563e-10	Up
Atp1a2	ENSMUSG00000007097	98660	28348	26565	33851	13136	17019	13402	18502.4	-0.607059	0.156319	-3.88346	0.00010298	0.000612997	Down
Slamf9	ENSMUSG00000026548	98365	239	316	224	25	60	57	185.541	-2.06867	0.343738	-6.01814	1.76435e-09	3.07341e-08	Down
Igsf9	ENSMUSG00000037995	93842	89	112	95	15	17	22	86.5314	-2.04827	0.313346	-6.53677	6.28612e-11	1.41011e-09	Down
Ackr1	ENSMUSG00000037872	13349	173	138	228	706	358	564	382.704	2.04123	0.279827	7.29462	2.99497e-13	1.00554e-11	Up
Cadm3	ENSMUSG00000005338	94332	549	465	624	682	832	576	672.847	0.774556	0.186816	4.14608	3.3821e-05	0.000228346	Up
Ifi207	ENSMUSG00000073490	226691	1660	1854	1412	3214	5277	3063	2916.63	1.61903	0.297232	5.44703	5.12187e-08	6.71021e-07	Up
Ifi204	ENSMUSG00000073489	15951	1366	1662	1126	3028	4018	2951	2623.26	1.65426	0.278082	5.94882	2.7009e-09	4.57556e-08	Up
Mndal	ENSMUSG00000090272	100040462	1344	1737	1242	583	771	692	1083.92	-0.688748	0.211785	-3.25211	0.0011455	0.00500353	Down
Ifi211	ENSMUSG00000026536	381308	367	516	274	900	1686	1022	918.634	2.01037	0.357646	5.62113	1.89716e-08	2.72789e-07	Up
Ifi205	ENSMUSG00000054203	226695	1082	779	861	1191	4032	1077	1477.02	1.60622	0.464343	3.45913	0.000541919	0.00262147	Up
Fmn2	ENSMUSG00000028354	54418	9	18	23	3	5	6	12.3116	-1.41627	0.590353	-2.39902	0.0164389	0.0477264	Down
Rgs7	ENSMUSG00000026527	24012	242	263	297	386	316	310	265.767	0.755943	0.235322	3.21238	0.0013164	0.00562207	Up
Kmo	ENSMUSG00000039783	98256	96	135	109	32	31	61	101.004	-1.05088	0.3546	-2.96357	0.00304091	0.0115667	Down
Opn3	ENSMUSG00000026525	13603	1096	1173	1677	580	391	419	769.684	-1.07056	0.254594	-4.20498	2.61109e-05	0.000182812	Down
Chml	ENSMUSG00000078185	12663	650	586	766	279	348	273	431.011	-0.731034	0.138356	-5.28373	1.2658e-07	1.5221e-06	Down
Sdccag8	ENSMUSG00000026504	76816	557	552	743	224	300	290	428.116	-0.762176	0.130679	-5.83243	5.46261e-09	8.72388e-08	Down
Catspere2	ENSMUSG00000091476	545391	26	31	42	15	9	14	20.2251	-0.953405	0.373013	-2.55596	0.0105895	0.0330706	Down
Kif26b	ENSMUSG00000026494	269152	12	18	29	8	2	3	19.4605	-1.74381	0.613864	-2.84071	0.00450133	0.0160816	Down
Cnst	ENSMUSG00000038949	226744	1936	1485	2365	506	562	524	1037.33	-1.42715	0.16854	-8.46771	2.50271e-17	1.60126e-15	Down
Sccpdh	ENSMUSG00000038936	109232	1136	782	1285	535	491	456	665.036	-0.673758	0.166219	-4.05342	5.04739e-05	0.000327156	Down
Itpkb	ENSMUSG00000038855	320404	4432	3503	3747	1494	1930	1706	3023.22	-0.772647	0.112941	-6.84114	7.85661e-12	2.09503e-10	Down
Stum	ENSMUSG00000053963	381310	50	71	59	12	14	6	31.5602	-2.09242	0.450643	-4.64319	3.43069e-06	2.96898e-05	Down
Lefty2	ENSMUSG00000066652	320202	7	1	12	0	0	0	2.62548	-4.68829	1.74911	-2.68038	0.00735383	0.0243603	Down
Pycr2	ENSMUSG00000026520	69051	443	444	455	542	543	534	511.722	0.686717	0.110099	6.2373	4.45194e-10	8.62658e-09	Up
Ephx1	ENSMUSG00000038776	13849	2097	1675	2500	570	689	820	2059.9	-1.1609	0.167391	-6.93525	4.05495e-12	1.15066e-10	Down
Capn2	ENSMUSG00000026509	12334	6877	6653	7706	7667	9323	8303	8543.98	0.669104	0.0992743	6.73995	1.58441e-11	3.98966e-10	Up
Susd4	ENSMUSG00000038576	96935	41	21	55	8	9	9	105.248	-1.72353	0.416169	-4.14141	3.45181e-05	0.000232475	Down
Tlr5	ENSMUSG00000079164	53791	305	290	459	130	142	90	244	-1.11026	0.290842	-3.8174	0.000134868	0.000775367	Down
Disp1	ENSMUSG00000030768	68897	394	332	582	233	204	156	323.364	-0.701286	0.218592	-3.2082	0.00133569	0.00569012	Down
Dusp10	ENSMUSG00000039384	63953	317	437	293	531	251	610	505.846	0.813475	0.334983	2.42841	0.0151652	0.0447434	Up
C130074G19Rik	ENSMUSG00000039349	226777	4972	3420	4972	1299	2505	1495	3870.02	-0.913418	0.217745	-4.19491	2.72986e-05	0.000190277	Down
Tgfb2	ENSMUSG00000039239	21808	232	215	318	64	68	41	160.875	-1.71609	0.284277	-6.03668	1.57316e-09	2.77121e-08	Down
Rrp15	ENSMUSG00000001305	67223	258	248	287	471	416	433	379.943	1.15741	0.136287	8.49242	2.02383e-17	1.33036e-15	Up
Kcnk2	ENSMUSG00000037624	16526	173	156	221	25	57	27	127.265	-1.91556	0.284889	-6.72386	1.76975e-11	4.3965e-10	Down
Ptpn14	ENSMUSG00000026604	19250	3187	3096	4427	940	1036	845	1895.61	-1.49688	0.135451	-11.051	2.1672e-28	4.45393e-26	Down
Ppp2r5a	ENSMUSG00000026626	226849	16698	11611	14545	5616	4332	5678	9527.02	-1.02485	0.169764	-6.03696	1.57048e-09	2.76889e-08	Down
Gm32200	ENSMUSG00000103114	102634668	107	69	71	37	23	32	59.3514	-1.0012	0.311916	-3.20984	0.00132807	0.00566239	Down
Lpgat1	ENSMUSG00000026623	226856	12851	9697	7834	15190	27313	16274	15288.2	1.34867	0.249504	5.40541	6.46586e-08	8.32096e-07	Up
1700034H15Rik	ENSMUSG00000055833	98736	28	39	44	14	17	13	25.2746	-0.91757	0.339464	-2.703	0.00687166	0.022999	Down
Hhat	ENSMUSG00000037375	226861	65	53	69	70	65	75	67.385	0.592803	0.19974	2.96788	0.0029986	0.0114229	Up
Sertad4	ENSMUSG00000016262	214791	87	70	129	18	15	37	76.0248	-1.58614	0.345198	-4.59486	4.33037e-06	3.6604e-05	Down
Utp25	ENSMUSG00000016181	215193	335	274	363	391	347	389	352.539	0.640671	0.107046	5.985	2.16387e-09	3.72157e-08	Up
Traf3ip3	ENSMUSG00000037318	215243	79	86	73	27	23	21	58.9283	-1.33711	0.348936	-3.83196	0.000127124	0.000737515	Down
G0s2	ENSMUSG00000009633	14373	2429	4392	3371	6012	2543	6918	4996.09	1.00793	0.354078	2.84663	0.00441849	0.0158356	Up
Cd46	ENSMUSG00000016493	17221	249	235	316	123	147	117	167.741	-0.623807	0.226973	-2.74838	0.00598904	0.0205036	Down
Cr2	ENSMUSG00000026616	12902	17	32	25	3	5	13	13.0016	-1.41631	0.586857	-2.41337	0.0158056	0.0462574	Down
Mthfd1l	ENSMUSG00000040675	270685	77	73	65	186	163	163	161.766	1.66589	0.240242	6.93424	4.08415e-12	1.15572e-10	Up
Akap12	ENSMUSG00000038587	83397	3391	3108	3438	3768	7534	4090	4488.61	1.03658	0.24989	4.14813	3.35205e-05	0.00022643	Up
Ccdc170	ENSMUSG00000019767	100504234	53	36	47	14	18	9	53.4108	-1.30695	0.358066	-3.65003	0.000262214	0.00138463	Down
Esr1	ENSMUSG00000019768	13982	1473	1036	2075	702	262	456	1066.76	-1.22991	0.324934	-3.78511	0.00015364	0.00086929	Down
Syne1	ENSMUSG00000096054	64009	1942	1711	2808	679	530	474	1148.57	-1.50105	0.175899	-8.5336	1.41867e-17	9.4637e-16	Down
Myct1	ENSMUSG00000046916	68632	508	410	597	249	148	277	400.514	-0.72892	0.244128	-2.98581	0.00282825	0.0108593	Down
Nup43	ENSMUSG00000040034	69912	106	116	118	143	136	137	133.647	0.709295	0.152373	4.65498	3.24007e-06	2.82427e-05	Up
Sash1	ENSMUSG00000015305	70097	3283	2537	2672	4092	5490	5232	3898.58	1.2169	0.180384	6.74614	1.51828e-11	3.83263e-10	Up
Rab32	ENSMUSG00000019832	67844	980	749	865	1045	1147	1035	1095.04	0.735163	0.180428	4.07455	4.61032e-05	0.000301322	Up
Epm2a	ENSMUSG00000055493	13853	437	412	631	212	196	183	310.834	-0.891693	0.149718	-5.95581	2.58788e-09	4.39874e-08	Down
Stx11	ENSMUSG00000039232	74732	62	80	71	134	121	151	113.624	1.34117	0.289354	4.63503	3.56887e-06	3.07419e-05	Up
Plagl1	ENSMUSG00000019817	22634	3901	3005	3702	866	825	790	1682.83	-1.67126	0.217713	-7.67647	1.6353e-14	6.62784e-13	Down
Ltv1	ENSMUSG00000019814	353258	885	742	818	1087	880	1024	942.711	0.713183	0.124543	5.72639	1.02589e-08	1.55535e-07	Up
Pex3	ENSMUSG00000019809	56535	2163	1885	2825	1198	835	869	1361.65	-0.806376	0.196501	-4.10367	4.06655e-05	0.000269944	Down
Gm8355	ENSMUSG00000093798	666904	70	60	71	148	146	122	93.4779	1.47108	0.227075	6.47839	9.27042e-11	2.02161e-09	Up
Abracl	ENSMUSG00000078453	73112	356	289	411	447	396	430	441.703	0.701258	0.176467	3.97386	7.07162e-05	0.000440132	Up
Ect2l	ENSMUSG00000071392	100045792	9	8	10	1	2	1	8.87631	-2.33341	0.860053	-2.71311	0.00666558	0.022405	Down
Ccdc28a	ENSMUSG00000059554	215814	206	245	314	102	141	131	188.944	-0.612173	0.199882	-3.06268	0.00219364	0.00873078	Down
Mtfr2	ENSMUSG00000019992	71804	7	16	10	22	23	20	19.9719	1.37364	0.534106	2.57185	0.0101155	0.0318592	Up
Myb	ENSMUSG00000019982	17863	24	17	11	4	5	3	31.3252	-1.70785	0.574426	-2.97314	0.0029477	0.0112521	Down
Sgk1	ENSMUSG00000019970	20393	3654	3783	3623	4029	6691	3403	4374.18	0.751906	0.251142	2.99394	0.00275396	0.0106242	Up
Raet1e	ENSMUSG00000053219	379043	15	13	15	18	22	25	22.0344	1.01762	0.367157	2.77163	0.0055777	0.0193098	Up
LOC115487513	ENSMUSG00000077440	115487513	31	18	50	56	55	46	47.3256	1.10965	0.297081	3.73516	0.000187594	0.00103745	Up
Enpp1	ENSMUSG00000037370	18605	75	98	81	107	106	207	151.905	1.13266	0.377678	2.999	0.00270866	0.0104773	Up
Enpp3	ENSMUSG00000019989	209558	268	232	251	58	94	69	176.267	-1.35116	0.197877	-6.82829	8.59319e-12	2.27356e-10	Down
Arg1	ENSMUSG00000019987	11846	78	87	52	1280	491	1557	996.056	4.34442	0.523337	8.30138	1.02908e-16	5.96512e-15	Up
Akap7	ENSMUSG00000039166	432442	2121	1375	1746	715	644	610	1121.16	-0.984677	0.165013	-5.96728	2.41244e-09	4.11775e-08	Down
Epb41l2	ENSMUSG00000019978	13822	9740	7698	7298	3405	4175	3649	6891.94	-0.729553	0.178735	-4.08176	4.46952e-05	0.000293344	Down
Arhgap18	ENSMUSG00000039031	73910	1933	1735	1871	681	761	769	1599.76	-0.908282	0.0916265	-9.91288	3.65957e-23	4.68287e-21	Down
Lama2	ENSMUSG00000019899	16773	1929	1617	1971	531	951	582	1521.18	-1.0053	0.236407	-4.25241	2.11479e-05	0.000151718	Down
Ptprk	ENSMUSG00000019889	19272	610	469	552	591	874	613	715.862	0.765458	0.149277	5.12777	2.93199e-07	3.27231e-06	Up
9330159F19Rik	ENSMUSG00000004360	212448	898	356	819	199	264	285	328.454	-1.02083	0.31625	-3.22791	0.00124698	0.00536954	Down
Gm10275	ENSMUSG00000069682	19897	182	179	232	248	231	230	243.988	0.683214	0.168616	4.0519	5.08043e-05	0.000329088	Up
Rnf217	ENSMUSG00000063760	268291	390	426	735	202	196	126	317.044	-1.12833	0.251375	-4.48862	7.16857e-06	5.76261e-05	Down
Dse	ENSMUSG00000039497	212898	963	1002	1035	1543	1635	1865	1527.73	1.16365	0.169671	6.85827	6.96994e-12	1.8758e-10	Up
Tspyl4	ENSMUSG00000039485	72480	105	111	103	37	63	39	86.0409	-0.792094	0.244869	-3.23477	0.00121741	0.00526225	Down
Fam229b	ENSMUSG00000051736	66337	119	127	181	45	72	47	93.1676	-0.957709	0.243247	-3.93719	8.24405e-05	0.000502346	Down
Traf3ip2	ENSMUSG00000019842	103213	293	231	359	346	559	306	326.336	0.880349	0.222396	3.95848	7.54281e-05	0.000464873	Up
E130307A14Rik	ENSMUSG00000087177	327744	292	197	277	120	122	101	160.428	-0.730979	0.159501	-4.58292	4.58528e-06	3.84709e-05	Down
Mfsd4b1	ENSMUSG00000038522	215929	41	18	45	14	4	8	47.0505	-1.54229	0.510936	-3.01855	0.00253984	0.00992618	Down
Slc16a10	ENSMUSG00000019838	72472	1189	1243	1056	446	372	709	954.454	-0.781217	0.231439	-3.37548	0.000736869	0.00341823	Down
Rpf2	ENSMUSG00000038510	67239	243	237	259	501	419	543	422.892	1.40689	0.154024	9.1342	6.58905e-20	5.58586e-18	Up
Cdk19	ENSMUSG00000038481	78334	988	763	997	414	477	386	657.85	-0.681449	0.115853	-5.88203	4.05266e-09	6.62826e-08	Down
Ddo	ENSMUSG00000063428	70503	311	223	505	115	78	80	206.745	-1.47209	0.284525	-5.17386	2.29304e-07	2.62545e-06	Down
Mettl24	ENSMUSG00000045555	327747	120	53	83	16	26	9	44.0166	-1.89996	0.408557	-4.65043	3.31249e-06	2.87893e-05	Down
Wasf1	ENSMUSG00000019831	83767	139	109	170	63	63	47	89.6207	-0.84153	0.219953	-3.82595	0.000130267	0.000752317	Down
Ppil6	ENSMUSG00000078451	73075	15	22	33	3	8	4	41.6568	-1.79886	0.522251	-3.44444	0.000572253	0.0027486	Down
Afg1l	ENSMUSG00000038302	215951	461	329	380	180	192	173	276.49	-0.680894	0.146753	-4.63973	3.48871e-06	3.01535e-05	Down
Prep	ENSMUSG00000019849	19072	932	846	817	1382	1155	1436	1216.52	1.03063	0.146364	7.04158	1.9007e-12	5.687e-11	Up
Ascc3	ENSMUSG00000038774	77987	635	681	657	755	734	851	808.277	0.658524	0.15611	4.21835	2.46097e-05	0.000173978	Up
Lilrb4a	ENSMUSG00000062593	14728	741	970	661	2165	1438	2450	1890.05	1.75063	0.38774	4.51494	6.33342e-06	5.15645e-05	Up
Dcbld1	ENSMUSG00000019891	66686	202	111	144	303	307	285	228.367	1.39647	0.172159	8.11153	4.9986e-16	2.60106e-14	Up
Gopc	ENSMUSG00000019861	94221	1356	1318	1378	1551	1459	1791	1470.13	0.662145	0.113252	5.84663	5.01631e-09	8.06814e-08	Up
Nus1	ENSMUSG00000023068	52014	2063	2075	2371	4447	4229	5827	3704.71	1.57736	0.16048	9.82898	8.44722e-23	1.04162e-20	Up
Fam184a	ENSMUSG00000019856	75906	72	48	85	30	27	15	73.351	-1.07456	0.293775	-3.65777	0.000254423	0.0013498	Down
Tbc1d32	ENSMUSG00000038122	544696	433	421	509	179	178	236	315.356	-0.777464	0.139461	-5.57476	2.47866e-08	3.47799e-07	Down
Gja1	ENSMUSG00000050953	14609	1515	866	1223	2622	3422	2893	2680.52	1.73808	0.175665	9.89429	4.40721e-23	5.5695e-21	Up
Spock2	ENSMUSG00000058297	94214	2345	1310	3863	1250	500	481	1401.55	-1.27544	0.484466	-2.63267	0.00847171	0.0274441	Down
Chst3	ENSMUSG00000057337	53374	39	68	59	15	19	14	30.9749	-1.39065	0.455821	-3.05087	0.00228176	0.00902853	Down
Cdh23	ENSMUSG00000012819	22295	511	185	243	85	69	58	143.614	-1.71319	0.363492	-4.71314	2.43923e-06	2.20278e-05	Down
Vsir	ENSMUSG00000020101	74048	6287	7565	8219	2105	2175	3125	5134.91	-1.1588	0.197865	-5.85654	4.72619e-09	7.66208e-08	Down
Slc29a3	ENSMUSG00000020100	71279	1133	768	994	424	484	523	839.333	-0.589974	0.206973	-2.8505	0.00436512	0.0156691	Down
Sgpl1	ENSMUSG00000020097	20397	6023	4224	6723	2089	2385	2081	3530.63	-0.938053	0.158236	-5.9282	3.06269e-09	5.13714e-08	Down
Prf1	ENSMUSG00000037202	18646	14	31	15	4	6	5	11.6378	-1.6239	0.644265	-2.52055	0.0117173	0.0359794	Down
Aifm2	ENSMUSG00000020085	71361	7246	6863	9277	3336	3740	3939	5420.94	-0.659624	0.123428	-5.3442	9.08147e-08	1.12489e-06	Down
Macroh2a2	ENSMUSG00000020086	404634	158	150	273	91	88	90	151.47	-0.670954	0.223156	-3.00666	0.00264137	0.0102579	Down
Srgn	ENSMUSG00000020077	19073	2045	2131	2217	3699	3213	3886	3411.36	1.1731	0.205318	5.71356	1.10636e-08	1.66741e-07	Up
Ddx21	ENSMUSG00000020075	56200	1555	1635	1889	4022	3268	3773	2978.02	1.54562	0.134275	11.5109	1.16324e-30	3.03425e-28	Up
Tet1	ENSMUSG00000047146	52463	17	18	23	2	3	4	15.7748	-2.26509	0.590862	-3.83354	0.000126314	0.000734071	Down
Pbld2	ENSMUSG00000020072	67307	326	218	383	171	117	106	206.656	-0.790627	0.251339	-3.14566	0.00165714	0.00685568	Down
Jmjd1c	ENSMUSG00000037876	108829	1833	1575	2006	2587	3388	1943	2098.55	0.966831	0.177686	5.44123	5.29146e-08	6.91458e-07	Up
Egr2	ENSMUSG00000037868	13654	43	51	33	266	103	306	340.395	2.81671	0.771939	3.64888	0.00026339	0.00138977	Up
A930033H14Rik	ENSMUSG00000090622	320700	263	193	301	113	127	103	149.061	-0.711105	0.170817	-4.16297	3.14139e-05	0.000214263	Down
Ank3	ENSMUSG00000069601	11735	70	63	91	17	33	26	88.3045	-1.13566	0.350544	-3.2397	0.00119654	0.00518525	Down
Gnaz	ENSMUSG00000040009	14687	37	29	34	12	12	7	24.6828	-1.26822	0.360287	-3.52003	0.000431499	0.00214495	Down
Rab36	ENSMUSG00000020175	76877	87	51	109	16	13	12	68.8329	-2.14568	0.353354	-6.07233	1.2607e-09	2.26192e-08	Down
Upb1	ENSMUSG00000033427	103149	33	37	37	5	6	2	27.8038	-2.62832	0.516285	-5.09084	3.56487e-07	3.91002e-06	Down
Snrpd3	ENSMUSG00000020180	67332	608	525	574	760	573	717	692.17	0.687062	0.139686	4.91863	8.71508e-07	8.70481e-06	Up
Lrrc75b	ENSMUSG00000046807	192734	30	21	34	5	5	5	40.9658	-2.06889	0.568765	-3.63752	0.000275279	0.00144314	Down
Ggt5	ENSMUSG00000006344	23887	850	812	1025	308	531	359	667.826	-0.750059	0.22836	-3.28454	0.00102148	0.00453481	Down
Gstt3	ENSMUSG00000001665	103140	521	334	515	102	129	110	255.106	-1.57494	0.183186	-8.59748	8.14875e-18	5.52649e-16	Down
Gstt1	ENSMUSG00000001663	14871	1641	1603	1752	434	654	454	953.439	-1.28584	0.18542	-6.93477	4.06871e-12	1.15295e-10	Down
Gstt2	ENSMUSG00000033318	14872	1417	1339	1869	485	386	494	877.244	-1.32774	0.205898	-6.44856	1.12914e-10	2.43008e-09	Down
Mif	ENSMUSG00000033307	17319	796	626	1001	1271	995	1213	1094.58	0.961472	0.160209	6.00134	1.95693e-09	3.38281e-08	Up
Gm867	ENSMUSG00000050157	333670	32	79	81	116	44	135	120.327	1.04102	0.435683	2.38941	0.0168755	0.0487988	Up
Pcnt	ENSMUSG00000001151	18541	1071	908	1198	460	405	484	737.418	-0.807507	0.104199	-7.74964	9.21566e-15	3.89817e-13	Down
Pcbp3	ENSMUSG00000001120	59093	343	361	325	299	486	394	379.825	0.598915	0.184845	3.2401	0.00119489	0.00518141	Up
Fam207a	ENSMUSG00000032977	108707	353	264	362	385	405	385	388.947	0.689396	0.0983358	7.01063	2.37251e-12	6.99581e-11	Up
Pttg1ip	ENSMUSG00000009291	108705	6612	5226	6921	7283	7958	8271	6955.56	0.752685	0.135217	5.56651	2.59895e-08	3.62676e-07	Up
Ube2g2	ENSMUSG00000009293	22213	1453	1152	1377	1457	2264	1857	1616.14	0.902941	0.137592	6.56244	5.2935e-11	1.20877e-09	Up
Cfap410	ENSMUSG00000020284	67884	655	555	727	319	297	341	443.962	-0.589881	0.128801	-4.57978	4.65471e-06	3.90053e-05	Down
Pwp2	ENSMUSG00000032834	110816	322	340	350	739	538	691	567.081	1.37921	0.157224	8.77226	1.75114e-18	1.25013e-16	Up
Cstb	ENSMUSG00000005054	13014	1463	1182	1367	1849	1943	1857	2030.69	0.914212	0.22809	4.00811	6.12062e-05	0.000387221	Up
Plpp2	ENSMUSG00000052151	50784	514	321	436	473	537	457	444.966	0.634084	0.181757	3.48863	0.000485501	0.00238484	Up
Cdc34	ENSMUSG00000020307	216150	1009	767	885	1097	899	988	1000.95	0.589937	0.163764	3.60237	0.000315334	0.00162701	Up
Fstl3	ENSMUSG00000020325	83554	62	67	73	219	205	232	240.053	2.11953	0.218494	9.70066	2.9955e-22	3.48265e-20	Up
Palm	ENSMUSG00000035863	18483	3824	3305	4215	936	1567	1283	2427.45	-1.16507	0.186355	-6.2519	4.05476e-10	7.9249e-09	Down
Ptbp1	ENSMUSG00000006498	19205	4110	3894	4593	6637	4658	6021	5586.29	0.88548	0.162482	5.44972	5.04497e-08	6.61798e-07	Up
Plppr3	ENSMUSG00000035835	216152	783	714	788	269	171	236	401.523	-1.33304	0.18207	-7.32157	2.45078e-13	8.3384e-12	Down
Prtn3	ENSMUSG00000057729	19152	359	446	427	163	53	134	217.877	-1.39295	0.363958	-3.82721	0.000129602	0.000749328	Down
Elane	ENSMUSG00000020125	50701	74	59	96	35	9	19	36.5721	-1.4143	0.424197	-3.33407	0.000855854	0.00389122	Down
Cfd	ENSMUSG00000061780	11537	345107	251891	412351	169731	59452	88480	159924	-1.21565	0.372532	-3.26321	0.00110158	0.0048397	Down
Sbno2	ENSMUSG00000035673	216161	1326	1639	1500	7258	5445	6763	4458.65	2.53516	0.196322	12.9133	3.78672e-38	1.9755e-35	Up
Midn	ENSMUSG00000035621	59090	1667	1532	1849	3490	2613	3216	2595.87	1.31124	0.130036	10.0837	6.52314e-24	9.15308e-22	Up
Cirbp	ENSMUSG00000045193	12696	1655	1242	1838	645	544	435	884.172	-1.10997	0.194866	-5.69608	1.22596e-08	1.8287e-07	Down
Efna2	ENSMUSG00000003070	13637	113	68	123	45	44	46	69.9197	-0.732246	0.275089	-2.66185	0.00777124	0.0255228	Down
Pwwp3a	ENSMUSG00000020156	68114	2637	1835	2408	714	670	723	1376.89	-1.27821	0.141046	-9.06236	1.27657e-19	1.0473e-17	Down
Gamt	ENSMUSG00000020150	14431	652	437	369	136	262	182	414.623	-0.928072	0.287847	-3.22419	0.0012633	0.00542716	Down
Apc2	ENSMUSG00000020135	23805	84	79	102	8	34	18	52.811	-1.73001	0.367039	-4.71343	2.43576e-06	2.20062e-05	Down
Pcsk4	ENSMUSG00000020131	18551	569	335	627	140	88	71	210.645	-1.90821	0.283548	-6.72978	1.69919e-11	4.24715e-10	Down
Reep6	ENSMUSG00000035504	70335	2341	1708	1745	757	978	732	1120.58	-0.819524	0.226403	-3.61976	0.00029488	0.00153247	Down
Mknk2	ENSMUSG00000020190	17347	20850	16957	20593	6056	3682	6320	11792.8	-1.43088	0.234369	-6.10521	1.02664e-09	1.86833e-08	Down
Mob3a	ENSMUSG00000003348	208228	121	101	123	173	201	181	167.161	1.10707	0.261442	4.23447	2.29091e-05	0.000163317	Up
Izumo4	ENSMUSG00000055862	71564	427	377	498	171	203	161	281.215	-0.85944	0.121786	-7.05694	1.70205e-12	5.12278e-11	Down
Lmnb2	ENSMUSG00000062075	16907	212	175	189	364	284	349	289.415	1.21411	0.212758	5.70653	1.15302e-08	1.72749e-07	Up
Gadd45b	ENSMUSG00000015312	17873	246	222	359	376	447	314	354.452	0.890983	0.266278	3.34606	0.00081969	0.00374858	Up
Gng7	ENSMUSG00000048240	14708	514	365	470	132	184	152	245.774	-1.10499	0.23538	-4.6945	2.6726e-06	2.38286e-05	Down
Thop1	ENSMUSG00000004929	50492	424	349	447	788	651	846	646.419	1.33409	0.138546	9.62923	6.01776e-22	6.8785e-20	Up
Tbxa2r	ENSMUSG00000034881	21390	28	44	64	9	12	9	25.0843	-1.75514	0.417514	-4.20379	2.62485e-05	0.000183712	Down
Tle2	ENSMUSG00000034771	21886	195	128	189	49	74	76	122.661	-0.93482	0.221475	-4.22088	2.43352e-05	0.000172337	Down
Ankrd24	ENSMUSG00000054708	70615	369	205	372	143	164	155	223.244	-0.595074	0.193231	-3.07959	0.00207283	0.008315	Down
Glt8d2	ENSMUSG00000020251	74782	162	160	208	30	80	38	112.328	-1.428	0.299975	-4.7604	1.93212e-06	1.78443e-05	Down
Txnrd1	ENSMUSG00000020250	50493	1919	1777	2352	4267	3161	3470	2884.25	1.28021	0.139908	9.15042	5.67136e-20	4.91019e-18	Up
Chst11	ENSMUSG00000034612	58250	822	692	1090	1777	1127	2256	1669.05	1.43054	0.2744	5.21332	1.85488e-07	2.16236e-06	Up
Slc41a2	ENSMUSG00000034591	338365	214	162	171	761	738	706	558.347	2.42999	0.23542	10.3219	5.60844e-25	8.71063e-23	Up
D10Wsu102e	ENSMUSG00000020255	28109	560	575	635	766	812	769	728.166	0.824624	0.103024	8.00421	1.20233e-15	5.90886e-14	Up
Nuak1	ENSMUSG00000020032	77976	685	740	968	353	268	388	566.275	-0.816233	0.192019	-4.2508	2.13008e-05	0.000152601	Down
Ckap4	ENSMUSG00000046841	216197	749	654	778	966	1153	1237	1152.67	1.04234	0.165583	6.29494	3.07513e-10	6.09218e-09	Up
Cry1	ENSMUSG00000020038	12952	283	260	295	474	467	516	389.999	1.21896	0.138761	8.78461	1.56906e-18	1.13206e-16	Up
Pwp1	ENSMUSG00000001785	103136	510	502	588	688	585	692	648.249	0.719726	0.123484	5.82851	5.59252e-09	8.91736e-08	Up
1810014B01Rik	ENSMUSG00000097412	66263	87	73	113	34	41	21	52.6104	-1.0798	0.251701	-4.29003	1.78648e-05	0.000130653	Down
Utp20	ENSMUSG00000004356	70683	600	552	602	1267	900	1243	1003.97	1.38252	0.187828	7.36056	1.83144e-13	6.4025e-12	Up
1500026H17Rik	ENSMUSG00000097383	69002	21	20	28	9	9	4	14.2182	-1.22401	0.456111	-2.68357	0.00728409	0.0241726	Down
Uhrf1bp1l	ENSMUSG00000019951	75089	1994	2398	4167	4021	3127	3923	3405.95	0.815361	0.215175	3.78928	0.000151082	0.000857679	Up
Snrpf	ENSMUSG00000020018	69878	245	185	215	294	253	292	284.104	0.80373	0.151606	5.30142	1.14902e-07	1.39155e-06	Up
Ntn4	ENSMUSG00000020019	57764	489	508	840	184	400	237	470.478	-0.737135	0.304865	-2.41791	0.01561	0.0457638	Down
Nr2c1	ENSMUSG00000005897	22025	616	575	667	272	270	287	450.23	-0.743177	0.0924592	-8.03789	9.13991e-16	4.54672e-14	Down
Plxnc1	ENSMUSG00000074785	54712	121	202	150	40	43	78	192.763	-1.15838	0.382291	-3.03009	0.00244479	0.00959337	Down
Socs2	ENSMUSG00000020027	216233	571	470	717	766	766	640	694.51	0.737371	0.165473	4.45614	8.34493e-06	6.60132e-05	Up
Ube2n	ENSMUSG00000074781	93765	1689	1394	1649	1741	1691	1930	1870.77	0.603643	0.106685	5.65816	1.53004e-08	2.2428e-07	Up
Btg1	ENSMUSG00000036478	12226	6107	5781	5611	7973	6172	7715	7155.21	0.737221	0.148413	4.96736	6.78705e-07	6.98126e-06	Up
Dcn	ENSMUSG00000019929	13179	41353	35595	52470	16639	20899	13677	28105.6	-0.910611	0.284865	-3.19664	0.00139039	0.00588614	Down
Lum	ENSMUSG00000036446	17022	1804	1186	1348	324	813	547	1523.26	-0.955751	0.345014	-2.77018	0.00560261	0.0193796	Down
Dusp6	ENSMUSG00000019960	67603	736	1015	743	1136	1145	1223	1134.5	0.885699	0.214899	4.12147	3.76457e-05	0.000251458	Up
Ppfia2	ENSMUSG00000053825	327814	25	17	28	8	7	9	12.3781	-1.11111	0.463002	-2.39979	0.0164045	0.0476469	Down
Acss3	ENSMUSG00000035948	380660	2483	2397	3551	1589	1357	1113	1580.94	-0.621587	0.229815	-2.70473	0.00683594	0.0228983	Down
Nap1l1	ENSMUSG00000058799	53605	6912	9670	10571	9293	11803	12028	11787.3	0.698024	0.172869	4.03788	5.3936e-05	0.000346943	Up
Phlda1	ENSMUSG00000020205	21664	129	138	172	503	320	433	331.065	1.946	0.251557	7.7358	1.02754e-14	4.31059e-13	Up
Trhde	ENSMUSG00000050663	237553	422	293	451	83	137	97	207.581	-1.45185	0.39831	-3.64504	0.00026735	0.0014081	Down
Ptprr	ENSMUSG00000020151	19279	82	49	102	19	24	20	43.4388	-1.44526	0.341949	-4.22655	2.37303e-05	0.000168346	Down
Best3	ENSMUSG00000020169	382427	0	0	1	3	4	3	2.60456	3.63259	1.46287	2.48319	0.0130211	0.0393125	Up
Cct2	ENSMUSG00000034024	12461	3419	3207	3876	4604	3732	4313	4180.06	0.693813	0.123879	5.60071	2.13477e-08	3.03947e-07	Up
Lyz1	ENSMUSG00000069515	17110	1254	1462	1724	310	469	458	1066.94	-1.42899	0.246807	-5.78992	7.04199e-09	1.09706e-07	Down
Slc35e3	ENSMUSG00000060181	215436	386	359	383	418	410	483	433.612	0.63589	0.120848	5.26192	1.42559e-07	1.69819e-06	Up
Mdm1	ENSMUSG00000020212	17245	204	145	237	90	86	109	157.229	-0.604218	0.190723	-3.16803	0.00153474	0.00641582	Down
Irak3	ENSMUSG00000020227	73914	794	721	841	818	1426	867	965.508	0.811861	0.198107	4.0981	4.16564e-05	0.000275413	Up
Hmga2	ENSMUSG00000056758	15364	0	0	0	8	8	16	16.0184	6.27972	1.46774	4.27849	1.88162e-05	0.000136846	Up
Slc16a7	ENSMUSG00000020102	20503	1204	897	1046	260	335	200	501.982	-1.56853	0.247974	-6.3254	2.52574e-10	5.1184e-09	Down
Lrig3	ENSMUSG00000020105	320398	396	533	742	264	249	236	347.981	-0.730191	0.219229	-3.33072	0.000866205	0.0039295	Down
Mettl1	ENSMUSG00000006732	17299	299	229	309	595	427	522	460.701	1.31578	0.171736	7.66167	1.83528e-14	7.36336e-13	Up
Cdk4	ENSMUSG00000006728	12567	1527	1230	1580	1886	1539	1819	1754.33	0.703206	0.138195	5.08849	3.60931e-07	3.94952e-06	Up
Slc26a10	ENSMUSG00000040441	216441	91	116	130	30	13	29	56.1798	-1.80105	0.448384	-4.01676	5.90039e-05	0.000375271	Down
Kif5a	ENSMUSG00000074657	16572	238	227	220	275	306	323	267.678	0.813992	0.155337	5.24018	1.60417e-07	1.89758e-06	Up
Ndufa4l2	ENSMUSG00000040280	407790	401	299	338	132	199	179	266.908	-0.608291	0.182414	-3.33468	0.000853981	0.00388619	Down
Shmt2	ENSMUSG00000025403	108037	455	412	489	543	539	582	594.65	0.717634	0.129632	5.53594	3.09571e-08	4.23858e-07	Up
Lrp1	ENSMUSG00000040249	16971	18597	17740	25072	34211	24274	32776	28014.8	1.00695	0.201024	5.00908	5.46919e-07	5.73884e-06	Up
Stat6	ENSMUSG00000002147	20852	2910	2836	2927	3378	4003	4096	3890.43	0.816954	0.127904	6.38722	1.68932e-10	3.52884e-09	Up
Nab2	ENSMUSG00000025402	17937	239	311	358	734	497	655	560.456	1.47801	0.3027	4.88275	1.04617e-06	1.02383e-05	Up
Gpr182	ENSMUSG00000058396	11536	732	678	688	922	1619	1123	888.176	1.20987	0.19812	6.10676	1.01676e-09	1.85368e-08	Up
Ptges3	ENSMUSG00000071072	56351	1954	1970	2527	2565	2131	2624	2429.16	0.610098	0.122	5.00078	5.7099e-07	5.95456e-06	Up
Spryd4	ENSMUSG00000051346	66701	210	156	210	240	200	204	216.924	0.5896	0.151798	3.88412	0.0001027	0.000611512	Up
Timeless	ENSMUSG00000039994	21853	250	290	201	527	525	560	415.987	1.51895	0.228468	6.64841	2.96279e-11	7.05865e-10	Up
Il23a	ENSMUSG00000025383	83430	4	2	3	4	4	47	8.95058	3.05597	1.11723	2.7353	0.00623227	0.021215	Up
Myl6b	ENSMUSG00000039824	216459	227	143	190	44	102	58	114.226	-1.03978	0.318478	-3.26485	0.00109522	0.00481697	Down
Pa2g4	ENSMUSG00000025364	18813	2135	1892	2698	3507	2866	3447	2944.16	0.979814	0.120027	8.16327	3.26065e-16	1.75043e-14	Up
Rps26	ENSMUSG00000025362	27370	6489	5949	7512	9382	6893	8019	8158.15	0.713167	0.152219	4.68514	2.79773e-06	2.47813e-05	Up
Mmp19	ENSMUSG00000025355	58223	1439	824	1119	5853	1866	5354	3654.5	2.39728	0.405787	5.90773	3.46844e-09	5.76544e-08	Up
Cd63	ENSMUSG00000025351	12512	4817	3915	5273	7720	5530	7518	6706.86	1.00224	0.214658	4.66902	3.02639e-06	2.65295e-05	Up
Itga7	ENSMUSG00000025348	16404	5380	4805	4617	17097	13536	16265	11043.3	2.07973	0.188618	11.0261	2.85872e-28	5.75877e-26	Up
Tespa1	ENSMUSG00000034833	67596	18	35	10	4	5	1	9.63231	-2.29853	0.74619	-3.08036	0.00206749	0.00829688	Down
Pik3ip1	ENSMUSG00000034614	216505	495	265	524	96	169	79	274.671	-1.46511	0.312553	-4.68754	2.76503e-06	2.45786e-05	Down
Limk2	ENSMUSG00000020451	16886	1391	938	1197	2446	2053	2796	1889.47	1.47961	0.175961	8.40874	4.14424e-17	2.53209e-15	Up
Osbp2	ENSMUSG00000020435	74309	170	114	187	58	88	45	86.6208	-0.873255	0.262179	-3.33077	0.000866075	0.0039295	Down
Pes1	ENSMUSG00000020430	64934	1302	1220	1646	1667	1424	1663	1582.02	0.619575	0.111796	5.54202	2.98995e-08	4.1076e-07	Up
Sec14l4	ENSMUSG00000019368	103655	57	28	74	1	4	1	32.8807	-4.28029	0.682821	-6.26854	3.64452e-10	7.18521e-09	Down
Mtfp1	ENSMUSG00000004748	67900	140	94	160	70	53	39	87.4878	-0.844946	0.236336	-3.57519	0.000349978	0.00178328	Down
Osm	ENSMUSG00000058755	18413	16	15	8	140	65	355	102.895	4.25454	0.633299	6.71805	1.84169e-11	4.56563e-10	Up
Lif	ENSMUSG00000034394	16878	60	30	32	103	33	178	80.4304	1.80231	0.50431	3.57381	0.000351824	0.00179134	Up
Ascc2	ENSMUSG00000020412	75452	1200	1096	1189	1256	1181	1501	1368.89	0.596079	0.123304	4.83423	1.3366e-06	1.27914e-05	Up
Nipsnap1	ENSMUSG00000034285	18082	347	268	337	90	167	138	226.341	-0.850402	0.196197	-4.33443	1.46141e-05	0.000109155	Down
Rhbdd3	ENSMUSG00000034175	279766	608	471	628	250	284	218	356.806	-0.757796	0.141261	-5.36449	8.11769e-08	1.02131e-06	Down
Znrf3	ENSMUSG00000041961	407821	374	339	400	181	171	173	266.091	-0.66209	0.135321	-4.89275	9.94356e-07	9.79718e-06	Down
Xbp1	ENSMUSG00000020484	22433	6630	7594	10030	24894	15507	22110	14258.3	1.79852	0.212238	8.47409	2.3693e-17	1.53035e-15	Up
Camk2b	ENSMUSG00000057897	12323	75	58	86	89	95	103	113.784	0.820482	0.272779	3.00786	0.00263093	0.0102272	Up
Ddx56	ENSMUSG00000004393	52513	738	671	836	1060	830	937	898.37	0.759584	0.118445	6.41297	1.42713e-10	2.99345e-09	Up
H2az2	ENSMUSG00000041126	77605	637	515	672	310	257	241	428.2	-0.747348	0.119831	-6.23671	4.46878e-10	8.65097e-09	Down
Snhg15	ENSMUSG00000085156	100041286	55	56	63	117	85	102	95.026	1.22871	0.227645	5.39749	6.75791e-08	8.67395e-07	Up
Tbrg4	ENSMUSG00000000384	21379	875	581	774	916	771	830	833.411	0.60533	0.132441	4.57057	4.86392e-06	4.06078e-05	Up
Igfbp3	ENSMUSG00000020427	16009	1461	745	1386	1006	3096	1830	1649.01	1.15131	0.32306	3.56375	0.000365593	0.00185357	Up
Gm11992	ENSMUSG00000040978	626870	19	27	38	11	3	9	24.7744	-1.43603	0.471605	-3.04499	0.00232691	0.00918947	Down
Upp1	ENSMUSG00000020407	22271	67	121	89	245	572	370	249.568	2.48173	0.318209	7.79906	6.23683e-15	2.69988e-13	Up
Cobl	ENSMUSG00000020173	12808	317	180	576	174	61	59	246.726	-1.38611	0.520004	-2.66557	0.00768569	0.0253031	Down
Sec61g	ENSMUSG00000078974	20335	371	387	441	494	465	530	485.109	0.733087	0.142839	5.13227	2.86274e-07	3.20381e-06	Up
Egfr	ENSMUSG00000020122	13649	2842	2111	2268	2704	3807	2645	2708.45	0.754984	0.187582	4.02482	5.70186e-05	0.000364125	Up
Plek	ENSMUSG00000020120	56193	418	595	443	1350	802	1719	1131.43	1.8147	0.387255	4.68606	2.78512e-06	2.47126e-05	Up
Pno1	ENSMUSG00000020116	66249	756	682	743	1072	1069	1141	1048.15	1.00846	0.109779	9.18628	4.06653e-20	3.59729e-18	Up
Meis1	ENSMUSG00000020160	17268	698	684	965	392	433	289	513.661	-0.649194	0.215664	-3.01022	0.00261062	0.0101637	Down
Slc1a4	ENSMUSG00000020142	55963	114	148	149	184	197	135	195.037	0.738945	0.210314	3.51352	0.000442207	0.00219389	Up
Lgalsl	ENSMUSG00000042363	216551	1079	865	993	1300	2830	1464	1237.42	1.33642	0.271437	4.92349	8.50158e-07	8.49991e-06	Up
Peli1	ENSMUSG00000020134	67245	871	1081	1429	520	658	477	746	-0.610439	0.183127	-3.33341	0.000857882	0.00389783	Down
Wdpcp	ENSMUSG00000020319	216560	247	225	261	99	123	133	181.678	-0.626365	0.169277	-3.70023	0.000215407	0.0011714	Down
Fam161a	ENSMUSG00000049811	73873	340	389	485	136	190	166	253.709	-0.884084	0.157885	-5.59953	2.14929e-08	3.05586e-07	Down
Rel	ENSMUSG00000020275	19696	173	248	245	338	239	278	315.634	0.77478	0.255397	3.03362	0.00241636	0.00949281	Up
Fancl	ENSMUSG00000004018	67030	229	181	269	107	63	112	151.166	-0.829854	0.218991	-3.78944	0.000150986	0.000857374	Down
Ccdc85a	ENSMUSG00000032878	216613	588	269	467	415	974	452	494.793	0.900786	0.301303	2.98964	0.0027931	0.0107458	Up
Pnpt1	ENSMUSG00000020464	71701	965	818	835	1064	995	1008	962.784	0.645126	0.14425	4.47227	7.73927e-06	6.16777e-05	Up
Cfap36	ENSMUSG00000020462	216618	729	617	784	783	784	894	835.08	0.633884	0.0978076	6.48093	9.11614e-11	1.9901e-09	Up
Eml6	ENSMUSG00000044072	237711	87	87	101	31	42	57	70.5382	-0.661076	0.26308	-2.51283	0.0119766	0.0366761	Down
D630024D03Rik	ENSMUSG00000085772	414116	47	27	33	2	8	5	19.7172	-2.41631	0.576663	-4.19015	2.78766e-05	0.000193642	Down
Nsg2	ENSMUSG00000020297	18197	4	10	6	0	0	1	2.43828	-3.83138	1.46948	-2.60731	0.00912577	0.0292583	Down
Il9r	ENSMUSG00000020279	16199	14	30	9	2	3	6	11.9355	-1.90258	0.698909	-2.72222	0.00648459	0.0219198	Down
Hba-a1	ENSMUSG00000069919	15122	4290	3495	6621	4334	7962	7507	5093.7	0.896937	0.274901	3.26276	0.00110332	0.00484632	Up
Sh3pxd2b	ENSMUSG00000040711	268396	676	620	617	995	1013	1208	1164.17	1.16402	0.241056	4.82884	1.37328e-06	1.31116e-05	Up
Npm1	ENSMUSG00000057113	18148	3357	3663	5171	6382	4902	6380	5593.34	0.968529	0.175138	5.53009	3.20072e-08	4.36474e-07	Up
Pank3	ENSMUSG00000018846	211347	17801	11433	13564	5912	3593	5782	8609.47	-1.05267	0.246156	-4.27641	1.89934e-05	0.000137915	Down
Rars	ENSMUSG00000018848	104458	1163	1041	1104	1645	1617	1810	1549.22	1.03441	0.129831	7.96739	1.62061e-15	7.71803e-14	Up
Nudcd2	ENSMUSG00000020328	52653	590	522	563	606	597	693	640.411	0.598088	0.116289	5.14312	2.70211e-07	3.04245e-06	Up
C1qtnf2	ENSMUSG00000046491	69183	119	94	140	25	25	26	70.588	-1.78656	0.231633	-7.7129	1.22988e-14	5.07567e-13	Down
Adra1b	ENSMUSG00000050541	11548	53	27	43	6	14	8	25.0753	-1.70765	0.46472	-3.67457	0.000238253	0.00127599	Down
Clint1	ENSMUSG00000006169	216705	2236	1948	2274	2285	2976	2334	2412.04	0.650683	0.0945795	6.87975	5.99597e-12	1.64413e-10	Up
Thg1l	ENSMUSG00000011254	66628	218	171	171	281	238	285	260.373	0.941387	0.171986	5.47364	4.40896e-08	5.84015e-07	Up
Cyfip2	ENSMUSG00000020340	76884	146	221	203	73	44	81	144.319	-1.11316	0.348604	-3.1932	0.00140704	0.00594797	Down
Med7	ENSMUSG00000020397	66213	155	142	160	195	210	198	190.083	0.820413	0.127589	6.43012	1.27502e-10	2.70788e-09	Up
Havcr2	ENSMUSG00000020399	171285	22	43	26	80	41	74	66.9334	1.49373	0.614948	2.42903	0.0151393	0.0446754	Up
Timd4	ENSMUSG00000055546	276891	104	186	157	26	19	47	72.9333	-1.87528	0.380197	-4.93239	8.12301e-07	8.14944e-06	Down
Rack1	ENSMUSG00000020372	14694	6306	5908	7556	8477	6988	7639	7756.44	0.652545	0.12609	5.17523	2.27627e-07	2.60771e-06	Up
Trim7	ENSMUSG00000040350	94089	36	63	46	12	27	11	73.0475	-1.14924	0.415624	-2.7651	0.00569048	0.0196268	Down
Gm5431	ENSMUSG00000058163	432555	102	209	95	29	64	45	111.583	-1.1987	0.459559	-2.60837	0.00909748	0.0291768	Down
9930111J21Rik2	ENSMUSG00000069892	245240	462	552	445	163	191	236	366.201	-0.905075	0.246426	-3.67281	0.000239896	0.0012831	Down
Scgb3a1	ENSMUSG00000064057	68662	2	3	5	14	9	5	7.7184	1.91709	0.743317	2.57909	0.00990599	0.0313156	Up
Gfpt2	ENSMUSG00000020363	14584	791	895	1103	5588	1974	5432	3535.7	2.65662	0.371546	7.15017	8.66677e-13	2.72121e-11	Up
Mrnip	ENSMUSG00000020381	68067	88	67	64	40	29	38	54.9719	-0.61417	0.257312	-2.38686	0.0169927	0.0490751	Down
Zfp354c	ENSMUSG00000044807	30944	161	126	180	57	71	41	99.7362	-1.04078	0.223709	-4.65236	3.28151e-06	2.85445e-05	Down
Zfp879	ENSMUSG00000044296	214779	27	16	37	5	6	3	12.0516	-2.07041	0.599618	-3.45289	0.00055462	0.00267337	Down
Zfp454	ENSMUSG00000048728	237758	42	55	62	22	15	16	31.4207	-1.16458	0.31731	-3.67018	0.00024238	0.00129435	Down
Zfp2	ENSMUSG00000049321	22678	224	198	283	122	100	86	148.335	-0.764574	0.183131	-4.17501	2.97967e-05	0.00020502	Down
Hnrnpab	ENSMUSG00000020358	15384	2893	2401	2750	4448	3558	4156	3665.39	1.02063	0.129209	7.89909	2.80943e-15	1.25628e-13	Up
Nhp2	ENSMUSG00000001056	52530	610	461	563	1228	873	1083	884.381	1.39171	0.181075	7.68585	1.51985e-14	6.17222e-13	Up
D930048N14Rik	ENSMUSG00000052563	97775	518	277	446	81	171	86	202.856	-1.45133	0.298256	-4.86604	1.13855e-06	1.1073e-05	Down
Sec24a	ENSMUSG00000036391	77371	1057	952	1293	1428	986	1446	1203.02	0.659202	0.164273	4.01284	5.99924e-05	0.000380607	Up
Cdkl3	ENSMUSG00000020389	213084	204	133	230	68	106	79	134.594	-0.732357	0.189141	-3.87201	0.000107943	0.00063899	Down
Hspa4	ENSMUSG00000020361	15525	3228	2955	3085	4317	3507	4323	4113.11	0.809545	0.137043	5.90724	3.4789e-09	5.7781e-08	Up
Zcchc10	ENSMUSG00000018239	67966	182	188	186	225	186	242	234.454	0.64953	0.171207	3.79383	0.000148342	0.000844005	Up
Sowaha	ENSMUSG00000044352	237761	11	11	15	1	2	5	8.40846	-1.78327	0.700831	-2.54451	0.0109432	0.0340133	Down
Irf1	ENSMUSG00000018899	16362	1480	2508	1808	970	1047	906	1396.06	-0.598865	0.215978	-2.7728	0.00555764	0.0192469	Down
Gm12216	ENSMUSG00000081769	622459	223	182	194	61	73	52	115.883	-1.27184	0.229407	-5.54404	2.95568e-08	4.06601e-07	Down
Slc22a5	ENSMUSG00000018900	20520	1214	1227	1667	1634	1738	1374	1473.49	0.633506	0.187202	3.38407	0.000714197	0.00333434	Up
Csf2	ENSMUSG00000018916	12981	3	0	1	5	1	23	4.48337	3.32247	1.33073	2.49673	0.0125344	0.0381147	Up
Gpx3	ENSMUSG00000018339	14778	34168	43635	66191	25761	17551	18684	28750.1	-0.778299	0.302479	-2.57306	0.0100802	0.0317727	Down
Tnip1	ENSMUSG00000020400	57783	948	887	1468	2411	2174	2446	1671.2	1.52929	0.191949	7.96716	1.62357e-15	7.71803e-14	Up
Ccdc69	ENSMUSG00000049588	52570	518	689	976	380	246	375	455.474	-0.689951	0.249132	-2.76942	0.00561561	0.0194179	Down
Slc36a1	ENSMUSG00000020261	215335	819	699	883	1001	835	1212	1010.61	0.773131	0.174615	4.42764	9.52712e-06	7.41824e-05	Up
Sparc	ENSMUSG00000018593	20692	62069	67541	67259	52239	111207	75447	90354.2	0.678886	0.225849	3.00593	0.00264768	0.0102785	Up
G3bp1	ENSMUSG00000018583	27041	2552	2498	2943	4387	3578	4158	3526.63	1.02485	0.107873	9.50049	2.08905e-21	2.23704e-19	Up
Gria1	ENSMUSG00000020524	14799	4	2	3	0	0	0	14.8989	-3.60149	1.33765	-2.69241	0.00709382	0.0236182	Down
Gemin5	ENSMUSG00000037275	216766	536	550	653	791	612	757	684.957	0.73753	0.145887	5.05549	4.29289e-07	4.61157e-06	Up
Gm12258	ENSMUSG00000072915	108167848	337	289	404	122	194	128	213.123	-0.791933	0.215401	-3.67655	0.000236411	0.00126813	Down
Gjc2	ENSMUSG00000043448	118454	23	30	46	3	1	4	18.4163	-3.19537	0.657988	-4.85627	1.19618e-06	1.15453e-05	Down
Wnt9a	ENSMUSG00000000126	216795	228	146	307	94	75	56	134.624	-1.14822	0.331557	-3.46311	0.000533975	0.00258857	Down
Zfp867	ENSMUSG00000054519	237775	216	185	268	112	119	94	147.575	-0.614009	0.154556	-3.97274	7.10507e-05	0.000441808	Down
4933439C10Rik	ENSMUSG00000072893	74476	337	269	430	138	152	124	197.689	-0.889892	0.238962	-3.72399	0.000196095	0.00108006	Down
Nlrp3	ENSMUSG00000032691	216799	26	30	32	106	46	160	77.2982	2.25489	0.46835	4.81455	1.4753e-06	1.40133e-05	Up
1700007J10Rik	ENSMUSG00000086330	69320	39	29	37	44	65	32	45.5582	0.843774	0.304968	2.76676	0.00566165	0.0195541	Up
Flcn	ENSMUSG00000032633	216805	1632	1514	2088	795	785	657	1153.44	-0.798865	0.110078	-7.25728	3.94944e-13	1.30659e-11	Down
Srebf1	ENSMUSG00000020538	20787	9105	5856	9040	3352	1803	2480	5020.27	-1.20782	0.235428	-5.13032	2.89243e-07	3.23488e-06	Down
Natd1	ENSMUSG00000018931	24083	1211	969	1445	607	524	642	966.919	-0.596294	0.174435	-3.41844	0.000629823	0.00299122	Down
Map2k3os	ENSMUSG00000042549	24082	53	41	56	97	71	72	67.9828	1.10749	0.248582	4.45521	8.38094e-06	6.62723e-05	Up
Map2k3	ENSMUSG00000018932	26397	1344	1118	1458	2425	1699	2090	1863.05	1.09641	0.159135	6.88982	5.58616e-12	1.54251e-10	Up
Rnf112	ENSMUSG00000010086	22671	53	18	74	4	0	4	18.788	-3.69493	0.859865	-4.2971	1.73044e-05	0.000126874	Down
Epn2	ENSMUSG00000001036	13855	1944	1588	1713	1664	3663	1949	2181.19	0.876269	0.252039	3.47672	0.00050759	0.00247905	Up
Adora2b	ENSMUSG00000018500	11541	32	24	43	159	111	172	114.001	2.5995	0.312149	8.32775	8.23914e-17	4.83094e-15	Up
Pigl	ENSMUSG00000014245	327942	530	402	665	232	210	264	330.465	-0.738758	0.171088	-4.31799	1.57457e-05	0.000116614	Down
Trpv2	ENSMUSG00000018507	22368	415	459	314	407	940	691	588.854	1.16245	0.333559	3.48499	0.000492157	0.00241113	Up
Pmp22	ENSMUSG00000018217	18858	5929	3096	3682	1829	2368	1952	3191.09	-0.625069	0.20001	-3.12519	0.00177688	0.00728	Down
Hs3st3b1	ENSMUSG00000070407	54710	126	151	301	528	671	505	322.756	2.00101	0.303271	6.5981	4.16455e-11	9.70583e-10	Up
Shisa6	ENSMUSG00000053930	380702	38	31	71	7	8	3	22.5449	-2.51195	0.677321	-3.70866	0.000208362	0.00114022	Down
Tmem220	ENSMUSG00000050270	338369	252	221	319	108	85	80	159.277	-1.10455	0.222435	-4.96571	6.84484e-07	7.03715e-06	Down
Myh2	ENSMUSG00000033196	17882	6	2	7	0	0	0	3.58098	-4.31062	1.4726	-2.92722	0.00342007	0.0127556	Down
Myh1	ENSMUSG00000056328	17879	8	4	5	0	0	0	3.70699	-4.51868	1.47957	-3.05405	0.00225773	0.00894735	Down
Usp43	ENSMUSG00000020905	216835	118	108	184	54	85	38	107.335	-0.78307	0.307568	-2.546	0.0108965	0.0339023	Down
Ntn1	ENSMUSG00000020902	18208	1229	860	1785	594	520	454	854.387	-0.855001	0.249921	-3.42109	0.000623716	0.00296775	Down
Pik3r5	ENSMUSG00000020901	320207	372	396	375	609	728	613	734.383	1.17736	0.297381	3.95908	7.5238e-05	0.000463876	Up
Ndel1	ENSMUSG00000018736	83431	1537	1413	1529	2532	1858	2736	2312.72	1.09275	0.213618	5.11543	3.13027e-07	3.46719e-06	Up
Slc25a35	ENSMUSG00000018740	71998	1403	671	597	332	468	264	525.511	-0.917852	0.339916	-2.70023	0.0069291	0.0231569	Down
Ctc1	ENSMUSG00000020898	68964	597	515	637	283	270	279	439.231	-0.648082	0.0953908	-6.79397	1.09093e-11	2.842e-10	Down
Aloxe3	ENSMUSG00000020892	23801	29	19	29	54	56	50	51.9977	1.48413	0.334839	4.43236	9.32059e-06	7.28252e-05	Up
Cntrob	ENSMUSG00000032782	216846	227	191	236	86	117	109	162.708	-0.646239	0.146528	-4.41034	1.03211e-05	7.99058e-05	Down
Cyb5d1	ENSMUSG00000044795	327951	458	501	597	548	602	647	584.064	0.627893	0.14505	4.32882	1.49913e-05	0.000111767	Up
Trp53	ENSMUSG00000059552	22059	845	906	1069	1391	1204	1366	1258.41	0.912778	0.11622	7.85386	4.0343e-15	1.77667e-13	Up
Eif4a1	ENSMUSG00000059796	13681	7013	6499	8053	13178	10046	12346	10837.4	1.14977	0.161149	7.13485	9.68951e-13	3.02366e-11	Up
Tnfsfm13	ENSMUSG00000018752	619441	60	54	62	16	23	24	48.637	-1.06335	0.326449	-3.25734	0.00112463	0.00492504	Down
Tnfsf13	ENSMUSG00000089669	69583	52	42	49	17	27	21	38.8797	-0.71803	0.283138	-2.53597	0.0112135	0.0346892	Down
Chrnb1	ENSMUSG00000041189	11443	470	379	553	134	181	161	309.27	-1.13081	0.146688	-7.70893	1.26881e-14	5.21816e-13	Down
Fgf11	ENSMUSG00000042826	14166	633	445	610	117	251	173	323.184	-1.22267	0.333893	-3.66185	0.000250398	0.00133108	Down
Kctd11	ENSMUSG00000046731	216858	302	248	333	372	377	399	412.806	0.80575	0.143186	5.62728	1.83075e-08	2.63986e-07	Up
Eif5a	ENSMUSG00000078812	276770	8694	6983	7837	12286	9883	11578	10592.6	0.944825	0.15202	6.21515	5.12741e-10	9.79553e-09	Up
Ybx2	ENSMUSG00000018554	53422	305	198	288	86	119	88	163.053	-1.00567	0.185067	-5.43411	5.50706e-08	7.17788e-07	Down
Slc2a4	ENSMUSG00000018566	20528	6478	3172	4649	1422	1285	1201	2394.88	-1.43574	0.278368	-5.1577	2.5e-07	2.83609e-06	Down
Elp5	ENSMUSG00000018565	54351	625	524	637	762	700	873	732.193	0.812022	0.127438	6.3719	1.86703e-10	3.8565e-09	Up
Ctdnep1	ENSMUSG00000018559	67181	1887	1454	1820	2451	1713	2165	2014.91	0.724943	0.162066	4.47313	7.70842e-06	6.148e-05	Up
Asgr2	ENSMUSG00000040963	11890	28	52	26	5	9	14	25.7528	-1.53926	0.486756	-3.16229	0.00156532	0.00653158	Down
Mgl2	ENSMUSG00000040950	216864	865	1160	773	333	419	534	772.776	-0.731763	0.298408	-2.45223	0.0141975	0.0423739	Down
Alox15	ENSMUSG00000018924	11687	612	635	804	62	55	38	236.128	-3.30271	0.414322	-7.97136	1.56933e-15	7.51285e-14	Down
Tm4sf5	ENSMUSG00000018919	75604	27	7	28	6	4	0	12.388	-2.16938	0.776617	-2.79337	0.0052162	0.0182321	Down
Pfn1	ENSMUSG00000018293	18643	5501	4776	5356	6642	6252	7325	7091.3	0.792114	0.202525	3.91119	9.18442e-05	0.000552695	Up
Eno3	ENSMUSG00000060600	13808	315	247	379	151	165	107	204.093	-0.723342	0.190636	-3.79436	0.000148022	0.000843131	Down
Inca1	ENSMUSG00000057054	103844	730	587	1014	331	421	278	436.805	-0.743822	0.230271	-3.2302	0.00123704	0.00533352	Down
Rpain	ENSMUSG00000018449	69723	363	271	355	425	501	350	370.808	0.790636	0.167208	4.72847	2.2622e-06	2.05568e-05	Up
C1qbp	ENSMUSG00000018446	12261	1467	1162	1480	2004	1278	1460	1534.35	0.638529	0.165162	3.86608	0.000110599	0.000652965	Up
Dhx33	ENSMUSG00000040620	216877	1247	1053	1266	1648	1265	1467	1351.66	0.723133	0.119274	6.06277	1.33797e-09	2.39002e-08	Up
Nlrp1b	ENSMUSG00000070390	637515	112	143	118	20	29	45	104.432	-1.58678	0.423532	-3.74654	0.000179288	0.000995575	Down
Wscd1	ENSMUSG00000020811	216881	56	41	71	12	20	22	39.533	-1.20577	0.298193	-4.0436	5.26364e-05	0.000339227	Down
Pitpnm3	ENSMUSG00000040543	327958	359	352	504	68	77	122	216.828	-1.7548	0.261987	-6.69802	2.11256e-11	5.18481e-10	Down
Tekt1	ENSMUSG00000020799	21689	4	7	16	37	46	42	65.4564	2.64252	0.404204	6.53758	6.25213e-11	1.4087e-09	Up
Smtnl2	ENSMUSG00000045667	276829	74	61	131	250	279	120	178.193	1.72819	0.313906	5.50543	3.6826e-08	4.95216e-07	Up
Mybbp1a	ENSMUSG00000040463	18432	2235	2065	2693	4567	3457	4066	3532.45	1.2199	0.145149	8.40448	4.29764e-17	2.61796e-15	Up
Spns3	ENSMUSG00000020798	77577	34	17	46	7	7	7	18.7725	-1.75986	0.459945	-3.82623	0.000130121	0.000751685	Down
Camkk1	ENSMUSG00000020785	55984	84	76	115	108	105	110	120.402	0.66288	0.221313	2.99522	0.00274245	0.0105872	Up
Itgae	ENSMUSG00000005947	16407	226	112	155	58	37	34	85.7672	-1.49885	0.328419	-4.56382	5.02321e-06	4.16472e-05	Down
Haspin	ENSMUSG00000050107	14841	86	38	59	8	21	10	33.1812	-1.80502	0.434688	-4.15244	3.28951e-05	0.000222723	Down
P2rx5	ENSMUSG00000005950	94045	134	96	77	311	363	255	203.803	2.00441	0.259421	7.72646	1.10578e-14	4.61975e-13	Up
Shpk	ENSMUSG00000005951	74637	675	425	646	239	233	187	334.693	-0.97267	0.164781	-5.90282	3.57339e-09	5.92053e-08	Down
Trpv1	ENSMUSG00000005952	193034	154	99	106	52	47	37	81.8923	-0.979946	0.314074	-3.12011	0.00180782	0.00738592	Down
Trpv3	ENSMUSG00000043029	246788	41	25	32	4	16	12	18.1409	-1.19653	0.471116	-2.53977	0.0110926	0.0344013	Down
Aspa	ENSMUSG00000020774	11484	914	738	773	282	300	215	444.215	-1.19075	0.251682	-4.73118	2.23215e-06	2.03201e-05	Down
Ccdc92b	ENSMUSG00000069814	432582	33	17	28	3	7	3	11.5099	-2.15621	0.588349	-3.66485	0.000247486	0.00131815	Down
Cluh	ENSMUSG00000020741	74148	12629	9573	13717	5568	3776	5302	7213.24	-0.856396	0.178437	-4.79943	1.59114e-06	1.50035e-05	Down
Mettl16	ENSMUSG00000010554	67493	738	734	815	1041	1088	1150	957.827	0.93816	0.106253	8.82946	1.05179e-18	7.72556e-17	Up
Sgsm2	ENSMUSG00000038351	97761	723	515	576	202	233	173	387.982	-1.15863	0.150738	-7.6864	1.51328e-14	6.16195e-13	Down
Tsr1	ENSMUSG00000038335	104662	264	261	309	639	523	597	496.155	1.50084	0.137546	10.9115	1.01511e-27	1.96699e-25	Up
Hic1	ENSMUSG00000043099	15248	493	603	607	277	232	297	500.189	-0.664717	0.219606	-3.02686	0.00247108	0.00968278	Down
Rtn4rl1	ENSMUSG00000045287	237847	972	705	708	285	548	360	688.49	-0.592885	0.224608	-2.63964	0.00829941	0.0269787	Down
Mir22hg	ENSMUSG00000085148	100042498	1026	841	898	1729	1208	1314	1254.7	1.04322	0.160803	6.48759	8.72195e-11	1.92261e-09	Up
Rilp	ENSMUSG00000038195	280408	291	166	237	146	90	105	168.929	-0.58861	0.22135	-2.65918	0.00783311	0.0256845	Down
Pitpna	ENSMUSG00000017781	18738	3537	3147	3636	3715	3704	4277	4131.14	0.602011	0.128093	4.6998	2.60415e-06	2.33193e-05	Up
Tlcd3a	ENSMUSG00000069808	116972	172	198	228	223	291	339	258.21	0.930039	0.187883	4.9501	7.41735e-07	7.5419e-06	Up
Cpd	ENSMUSG00000020841	12874	5385	4479	5846	6089	5868	7650	5836.88	0.748387	0.152802	4.89777	9.69291e-07	9.58735e-06	Up
Tmigd1	ENSMUSG00000020839	66601	89	52	84	20	23	29	49.8315	-1.20968	0.319323	-3.78828	0.000151696	0.000860445	Down
Coro6	ENSMUSG00000020836	216961	1008	619	1170	228	310	139	471.206	-1.61048	0.29532	-5.45334	4.94338e-08	6.50149e-07	Down
Abhd15	ENSMUSG00000000686	67477	973	594	779	251	241	300	472.747	-1.13656	0.180209	-6.3069	2.84688e-10	5.70105e-09	Down
Sez6	ENSMUSG00000000632	20370	88	43	42	2	26	8	33.9092	-1.86895	0.621513	-3.00709	0.00263761	0.0102472	Down
Dhrs13	ENSMUSG00000020834	70451	29	26	42	72	60	55	49.4653	1.37717	0.255903	5.38161	7.38224e-08	9.39331e-07	Up
Flot2	ENSMUSG00000061981	14252	3203	2529	3179	3380	3817	3161	3173.73	0.639712	0.0874911	7.31174	2.63702e-13	8.92727e-12	Up
Tlcd1	ENSMUSG00000019437	68385	1049	515	862	441	375	329	573.719	-0.642562	0.223893	-2.86995	0.0041053	0.0148624	Down
Proca1	ENSMUSG00000044122	216974	899	696	1231	398	316	315	543.837	-1.01402	0.205135	-4.94321	7.68456e-07	7.79024e-06	Down
Unc119	ENSMUSG00000002058	22248	873	670	913	197	264	257	768.225	-1.34853	0.26181	-5.1508	2.59377e-07	2.93019e-06	Down
Slc46a1	ENSMUSG00000020829	52466	249	203	252	81	116	91	171.205	-0.86914	0.175198	-4.9609	7.01683e-07	7.18854e-06	Down
Vtn	ENSMUSG00000017344	22370	721	578	617	168	188	160	339.683	-1.47645	0.18469	-7.99422	1.30392e-15	6.36199e-14	Down
Lyrm9	ENSMUSG00000072640	66274	165	151	229	66	101	88	139.613	-0.668406	0.19776	-3.37988	0.000725165	0.00337934	Down
Rab11fip4	ENSMUSG00000017639	268451	46	75	26	70	73	118	112.688	1.20115	0.410502	2.92606	0.00343283	0.0127873	Up
Atad5	ENSMUSG00000017550	237877	149	95	138	59	52	66	95.7663	-0.678505	0.210565	-3.2223	0.00127164	0.0054584	Down
Adap2	ENSMUSG00000020709	216991	1305	1947	1209	2137	3052	3000	2611.38	1.2577	0.262515	4.79094	1.65998e-06	1.55712e-05	Up
Cdk5r1	ENSMUSG00000048895	12569	55	63	62	25	15	22	40.5753	-1.12028	0.339177	-3.30293	0.000956808	0.00428133	Down
Myo1d	ENSMUSG00000035441	338367	1219	909	1148	911	1660	1227	1301.25	0.630196	0.185659	3.39438	0.000687843	0.00323132	Up
Asic2	ENSMUSG00000020704	11418	43	31	117	4	6	1	27.9204	-3.65046	0.822274	-4.43946	9.01841e-06	7.07358e-05	Down
Ccl2	ENSMUSG00000035385	20296	162	195	159	3163	968	4198	2416.51	4.43045	0.610366	7.25868	3.90875e-13	1.29947e-11	Up
Ccl7	ENSMUSG00000035373	20306	104	233	79	2802	1318	4109	2570.38	4.67255	0.599208	7.79788	6.29582e-15	2.71963e-13	Up
Ccl12	ENSMUSG00000035352	20293	25	132	20	315	325	667	263.241	3.20142	0.752426	4.2548	2.09235e-05	0.000150427	Up
Cct6b	ENSMUSG00000020698	12467	35	32	51	17	9	19	21.8227	-0.953336	0.394529	-2.41639	0.0156753	0.045942	Down
Lig3	ENSMUSG00000020697	16882	396	365	485	512	449	474	478.158	0.631287	0.118849	5.31166	1.08631e-07	1.32031e-06	Up
Rad51d	ENSMUSG00000018841	19364	1316	1394	1484	398	421	392	898.315	-1.37788	0.1556	-8.85527	8.34779e-19	6.17615e-17	Down
Nle1	ENSMUSG00000020692	217011	148	176	192	311	277	290	266.949	1.1862	0.148904	7.9662	1.6363e-15	7.7511e-14	Up
Slfn10-ps	ENSMUSG00000072621	237887	28	34	18	55	77	109	67.7508	1.98039	0.505599	3.91692	8.96865e-05	0.00054051	Up
Slfn2	ENSMUSG00000072620	20556	433	810	450	860	841	1162	856.043	1.13687	0.415251	2.73778	0.00618549	0.0210698	Up
Slfn1	ENSMUSG00000078763	20555	29	225	32	376	220	500	251.176	2.25006	0.908288	2.47725	0.0132398	0.0399018	Up
Slfn4	ENSMUSG00000000204	20558	77	213	79	748	527	1208	516.484	3.11116	0.703768	4.42072	9.83718e-06	7.63921e-05	Up
AI662270	ENSMUSG00000087107	100043636	226	284	230	288	263	485	388.148	0.890998	0.347128	2.56677	0.010265	0.03226	Up
AA465934	ENSMUSG00000093483	613254	37	29	38	19	10	10	20.3221	-0.98586	0.395524	-2.49254	0.0126833	0.0385152	Down
Rasl10b	ENSMUSG00000020684	276952	127	60	185	173	320	138	140.404	1.21305	0.46446	2.61175	0.00900812	0.0289221	Up
1700020L24Rik	ENSMUSG00000035085	66330	341	204	341	57	57	57	159.033	-1.93612	0.225774	-8.5755	9.86614e-18	6.64691e-16	Down
Mmp28	ENSMUSG00000020682	118453	1870	1223	2081	321	462	403	998.94	-1.69029	0.169912	-9.94807	2.57111e-23	3.35332e-21	Down
Ccl5	ENSMUSG00000035042	20304	104	176	104	24	42	36	75.0913	-1.53406	0.37671	-4.07227	4.65581e-05	0.000304198	Down
Ccl9	ENSMUSG00000019122	20308	3121	3246	2881	8421	8636	12249	8289.56	2.07267	0.331338	6.25545	3.96374e-10	7.76938e-09	Up
E230016K23Rik	ENSMUSG00000051832	100504464	38	43	51	50	63	93	71.9795	1.06349	0.299377	3.55235	0.000381803	0.00192567	Up
Ccl6	ENSMUSG00000018927	20305	5969	6826	6951	10294	11272	16605	11751.2	1.36457	0.278855	4.8935	9.90606e-07	9.76496e-06	Up
Ccl3	ENSMUSG00000000982	20302	20	16	10	99	290	259	124.055	4.2094	0.535834	7.85579	3.97263e-15	1.7533e-13	Up
Ccl4	ENSMUSG00000018930	20303	6	16	12	40	22	165	48.6753	3.14686	0.77023	4.08561	4.39606e-05	0.000288919	Up
Wfdc17	ENSMUSG00000069792	100034251	431	345	570	861	1982	1560	959.5	2.13663	0.294468	7.2559	3.98993e-13	1.31784e-11	Up
Aatf	ENSMUSG00000018697	56321	444	354	527	535	491	550	502.305	0.68254	0.1184	5.7647	8.18017e-09	1.26182e-07	Up
Myo19	ENSMUSG00000020527	66196	542	320	431	510	470	526	494.739	0.650773	0.160344	4.0586	4.93678e-05	0.000320851	Up
Car4	ENSMUSG00000000805	12351	2634	2402	2990	8171	9004	10320	5267.94	2.19999	0.177581	12.3887	3.00958e-35	1.17755e-32	Up
Brip1	ENSMUSG00000034329	237911	116	75	76	28	29	18	59.7958	-1.41544	0.366197	-3.86524	0.000110981	0.000654881	Down
Vmp1	ENSMUSG00000018171	75909	4274	3158	4045	5368	6702	5010	4785.21	0.995575	0.131829	7.55204	4.28504e-14	1.63265e-12	Up
Tspoap1	ENSMUSG00000034156	207777	31	39	44	20	2	5	55.7069	-1.64447	0.597741	-2.75114	0.00593879	0.0203659	Down
Dynll2	ENSMUSG00000020483	68097	4775	3524	5406	2124	2242	2193	3144.3	-0.629258	0.121091	-5.19656	2.03014e-07	2.35492e-06	Down
Akap1	ENSMUSG00000018428	11640	2232	2635	3362	1479	1237	1266	1964.32	-0.621687	0.168015	-3.70019	0.000215441	0.0011714	Down
Dgke	ENSMUSG00000000276	56077	1169	830	1132	405	487	395	703.028	-0.856574	0.128572	-6.6622	2.69757e-11	6.4799e-10	Down
Gm525	ENSMUSG00000072553	217071	34	12	18	2	3	6	12.3159	-2.10675	0.674111	-3.12523	0.00177668	0.00728	Down
Mmd	ENSMUSG00000003948	67468	24560	21648	22690	9308	9491	12695	20998.8	-0.711636	0.194314	-3.6623	0.000249959	0.00132924	Down
Hlf	ENSMUSG00000003949	217082	663	418	717	76	99	81	347.149	-2.37608	0.259842	-9.14431	6.00098e-20	5.15173e-18	Down
Utp18	ENSMUSG00000054079	217109	486	482	532	734	554	719	638.367	0.84245	0.149325	5.64173	1.68353e-08	2.4449e-07	Up
Mbtd1	ENSMUSG00000059474	103537	956	888	1120	490	482	486	698.018	-0.599312	0.110471	-5.42506	5.79344e-08	7.52223e-07	Down
Nme2	ENSMUSG00000020857	18103	15	16	23	25	18	37	27.3021	0.999176	0.40309	2.47879	0.0131829	0.0397539	Up
Nme1	ENSMUSG00000037601	18102	361	272	295	704	465	648	536.586	1.3952	0.208377	6.69558	2.14821e-11	5.25962e-10	Up
Tob1	ENSMUSG00000037573	22057	2975	3153	4556	1675	1558	1567	2397.04	-0.723189	0.142745	-5.06629	4.05643e-07	4.39234e-06	Down
Wfikkn2	ENSMUSG00000044177	278507	62	36	104	30	18	12	33.6694	-1.28671	0.502318	-2.56154	0.0104209	0.0326542	Down
Abcc3	ENSMUSG00000020865	76408	379	429	494	459	621	614	615.573	0.795505	0.156646	5.07836	3.80714e-07	4.13341e-06	Up
Cacna1g	ENSMUSG00000020866	12291	240	159	294	45	37	24	101.987	-2.26571	0.379611	-5.96851	2.39424e-09	4.09012e-08	Down
Lrrc59	ENSMUSG00000020869	98238	3757	2855	3301	6387	5118	7263	5318.84	1.3473	0.167491	8.04401	8.69446e-16	4.33572e-14	Up
Col1a1	ENSMUSG00000001506	12842	10963	5711	12869	2862	4068	3436	8067.81	-1.06349	0.258008	-4.12193	3.75705e-05	0.000251038	Down
Itga3	ENSMUSG00000001507	16400	664	579	898	966	1847	823	1058.92	1.18489	0.32271	3.67167	0.000240968	0.00128782	Up
Dlx3	ENSMUSG00000001510	13393	0	0	0	0	1	9	4.94342	4.60573	1.64569	2.79866	0.00513158	0.0179857	Up
Fam117a	ENSMUSG00000038893	215512	988	624	1051	223	205	179	438.411	-1.69431	0.188024	-9.01113	2.03944e-19	1.62724e-17	Down
Zfp652	ENSMUSG00000075595	268469	1160	1210	1624	639	630	616	969.959	-0.656965	0.106993	-6.14025	8.23899e-10	1.51839e-08	Down
Hoxb2	ENSMUSG00000075588	103889	62	53	52	97	43	112	60.9813	1.01994	0.350154	2.91282	0.00358178	0.0132259	Up
Skap1	ENSMUSG00000057058	78473	21	39	23	4	5	5	18.6656	-2.17899	0.569477	-3.82631	0.000130081	0.00075167	Down
D030028A08Rik	ENSMUSG00000078700	319371	81	75	110	163	148	148	133.231	1.21568	0.174062	6.9842	2.86477e-12	8.32667e-11	Up
Prr15l	ENSMUSG00000047040	217138	10	15	9	51	98	48	59.8372	2.92328	0.488715	5.98156	2.2101e-09	3.79146e-08	Up
Pnpo	ENSMUSG00000018659	103711	856	703	969	1411	1010	1192	943.96	0.948807	0.152984	6.20199	5.57523e-10	1.06112e-08	Up
Tbx21	ENSMUSG00000001444	57765	26	18	15	7	2	8	14.5419	-1.37516	0.546599	-2.51584	0.0118748	0.0364082	Down
Kpnb1	ENSMUSG00000001440	16211	5160	4408	5282	5787	5420	6166	5812.1	0.650418	0.107575	6.04617	1.48332e-09	2.63348e-08	Up
Epop	ENSMUSG00000043439	103551	19	17	9	24	45	39	25.0042	1.65486	0.549084	3.01386	0.00257951	0.0100619	Up
B230217C12Rik	ENSMUSG00000050538	68127	29	30	41	10	15	13	24.9965	-0.972435	0.386649	-2.51503	0.0119022	0.0364866	Down
Plxdc1	ENSMUSG00000017417	72324	126	65	105	11	22	20	88.6953	-2.05052	0.608884	-3.36767	0.000758057	0.00350612	Down
Fbxl20	ENSMUSG00000020883	72194	2631	2139	3047	1140	1549	1164	1951.73	-0.595253	0.116034	-5.12999	2.89761e-07	3.23749e-06	Down
Tcap	ENSMUSG00000007877	21393	2	6	8	0	0	0	2.64213	-4.43525	1.4736	-3.0098	0.00261422	0.0101738	Down
Grb7	ENSMUSG00000019312	14786	15	10	13	1	5	3	54.3501	-1.65705	0.631019	-2.62599	0.00863979	0.0279113	Down
Ikzf3	ENSMUSG00000018168	22780	55	120	56	12	28	19	45.7484	-1.60622	0.436489	-3.67986	0.000233361	0.00125276	Down
Ormdl3	ENSMUSG00000038150	66612	6872	7142	12066	4029	3801	3712	5743.69	-0.736762	0.204426	-3.60405	0.000313301	0.00161787	Down
Psmd3	ENSMUSG00000017221	22123	2620	1940	2422	3168	2608	2757	2673.58	0.717376	0.113176	6.33861	2.31845e-10	4.72657e-09	Up
Csf3	ENSMUSG00000038067	12985	3	2	1	34	68	51	26.0726	5.08407	0.681875	7.45601	8.91825e-14	3.26938e-12	Up
Thra	ENSMUSG00000058756	21833	3372	2483	3588	877	1094	737	1661.45	-1.37506	0.146095	-9.41205	4.86551e-21	4.85263e-19	Down
Nr1d1	ENSMUSG00000020889	217166	12237	9311	13279	4391	2813	2142	6253.9	-1.46165	0.258443	-5.6556	1.55304e-08	2.27162e-07	Down
Rapgefl1	ENSMUSG00000038020	268480	45	23	65	12	8	12	26.3175	-1.6007	0.413234	-3.8736	0.000107241	0.000635573	Down
Rara	ENSMUSG00000037992	19401	451	453	548	657	555	631	620.982	0.768412	0.162637	4.72469	2.30464e-06	2.08865e-05	Up
Zfp385c	ENSMUSG00000014198	278304	17	11	24	1	1	1	6.92987	-3.6729	0.965793	-3.80299	0.00014296	0.000816809	Down
Rab5c	ENSMUSG00000019173	19345	4719	3801	4259	4539	5138	5103	4903.52	0.628465	0.108937	5.76909	7.97009e-09	1.23034e-07	Up
Stat3	ENSMUSG00000004040	20848	5288	5295	6163	11977	9370	10865	8338.73	1.36739	0.143757	9.51181	1.87373e-21	2.02781e-19	Up
Atp6v0a1	ENSMUSG00000019302	11975	4041	3349	3337	7806	6566	9629	6922.18	1.58065	0.288689	5.47526	4.36877e-08	5.79824e-07	Up
Plekhh3	ENSMUSG00000035172	217198	381	412	505	163	159	105	272.968	-1.18369	0.195445	-6.05641	1.39192e-09	2.48422e-08	Down
Cntnap1	ENSMUSG00000017167	53321	363	215	399	144	155	94	185.892	-0.874332	0.279201	-3.13155	0.00173884	0.00714716	Down
Ezh1	ENSMUSG00000006920	14055	2747	2932	3292	1286	1770	1338	2230.13	-0.617572	0.130016	-4.74998	2.03442e-06	1.8721e-05	Down
Psme3	ENSMUSG00000078652	19192	2590	2226	2453	3555	3040	3658	3129.15	0.917826	0.134085	6.84512	7.64141e-12	2.043e-10	Up
Aoc3	ENSMUSG00000019326	11754	49069	41676	42869	12208	24625	14656	27771.6	-0.97234	0.234389	-4.14839	3.34816e-05	0.000226243	Down
G6pc	ENSMUSG00000078650	14377	12	7	12	1	1	2	7.8149	-2.52088	0.883798	-2.85233	0.00434003	0.0155956	Down
Dhx8	ENSMUSG00000034931	217207	842	775	965	1044	973	1038	980.722	0.66729	0.0844751	7.89925	2.80584e-15	1.25628e-13	Up
Mpp3	ENSMUSG00000052373	13384	81	100	100	26	35	39	70.2158	-1.07891	0.282489	-3.8193	0.000133832	0.000769629	Down
Hdac5	ENSMUSG00000008855	15184	2394	2139	2614	1136	1191	988	1706.35	-0.686744	0.0757881	-9.06137	1.28825e-19	1.05264e-17	Down
Fam171a2	ENSMUSG00000034685	217219	194	147	213	190	199	231	218.522	0.592899	0.190097	3.11893	0.00181509	0.00740966	Up
Itga2b	ENSMUSG00000034664	16399	97	66	105	136	115	93	114.738	0.792989	0.211357	3.7519	0.000175499	0.000977742	Up
Fzd2	ENSMUSG00000050288	57265	227	166	338	75	69	56	170.142	-1.42402	0.26191	-5.43706	5.4167e-08	7.06463e-07	Down
Gjc1	ENSMUSG00000034520	14615	806	890	744	292	548	317	616.333	-0.683674	0.23159	-2.95209	0.00315635	0.0119167	Down
Higd1b	ENSMUSG00000020928	75689	160	162	184	49	91	61	112.007	-0.918262	0.201094	-4.56634	4.96311e-06	4.12666e-05	Down
Dcakd	ENSMUSG00000020935	68087	604	513	718	696	615	842	761.234	0.662516	0.132951	4.98316	6.2554e-07	6.4671e-06	Up
Plcd3	ENSMUSG00000020937	72469	254	262	388	116	130	108	223.046	-0.923808	0.205459	-4.49632	6.91399e-06	5.5911e-05	Down
Acbd4	ENSMUSG00000056938	67131	2593	2401	2789	687	1273	658	1779.66	-1.16353	0.226798	-5.13024	2.89368e-07	3.23488e-06	Down
Hexim1	ENSMUSG00000048878	192231	2181	1961	2418	963	1168	813	1416.98	-0.736888	0.133329	-5.52685	3.26026e-08	4.43997e-07	Down
Hexim2	ENSMUSG00000043372	71059	146	120	164	56	66	53	85.8929	-0.871643	0.225941	-3.85784	0.000114394	0.000672484	Down
Mapt	ENSMUSG00000018411	17762	108	113	177	32	53	47	96.6809	-1.16374	0.346559	-3.358	0.000785087	0.00361225	Down
Itgb3	ENSMUSG00000020689	16416	261	203	353	270	417	257	316.987	0.639709	0.259718	2.46309	0.0137746	0.0412995	Up
Mrc2	ENSMUSG00000020695	17534	457	432	534	408	992	1539	1476.88	1.46582	0.35033	4.18412	2.86273e-05	0.00019791	Up
Cyb561	ENSMUSG00000019590	13056	425	314	389	660	640	651	635.719	1.21573	0.160433	7.5778	3.51452e-14	1.34664e-12	Up
Ftsj3	ENSMUSG00000020706	56095	1167	1059	1250	2436	2073	2105	1781.02	1.35159	0.0979828	13.7942	2.76228e-43	2.08153e-40	Up
Cd79b	ENSMUSG00000040592	15985	52	162	80	7	10	9	43.4525	-3.13727	0.585362	-5.35955	8.34298e-08	1.04782e-06	Down
Polg2	ENSMUSG00000020718	50776	219	199	232	75	85	74	129.43	-1.05382	0.160058	-6.584	4.57967e-11	1.05577e-09	Down
Kpna2	ENSMUSG00000018362	16647	589	476	412	831	720	865	768.68	1.12246	0.22459	4.99783	5.79782e-07	6.02771e-06	Up
1810010H24Rik	ENSMUSG00000078607	69066	180	125	178	70	48	58	99.0257	-1.02195	0.279422	-3.65738	0.000254804	0.00135147	Down
Nol11	ENSMUSG00000018433	68979	533	551	579	755	624	736	676.329	0.765734	0.119232	6.42221	1.34313e-10	2.84068e-09	Up
Cacng1	ENSMUSG00000020722	12299	6	3	2	11	21	16	9.96467	2.53617	0.673974	3.763	0.000167884	0.000940983	Up
Cep112	ENSMUSG00000020728	76380	96	86	100	34	39	31	62.8847	-1.01937	0.24325	-4.19064	2.78171e-05	0.000193295	Down
Axin2	ENSMUSG00000000142	12006	721	528	774	183	95	100	392.785	-1.9799	0.297957	-6.64491	3.03399e-11	7.20299e-10	Down
Slc16a6	ENSMUSG00000041920	104681	318	364	286	474	507	486	426.178	1.00124	0.195379	5.12459	2.98179e-07	3.32242e-06	Up
Arsg	ENSMUSG00000020604	74008	219	167	308	121	108	101	163.325	-0.631424	0.205451	-3.07335	0.00211668	0.00846257	Down
Wipi1	ENSMUSG00000041895	52639	1776	1483	2044	1551	2798	1966	1916.6	0.67169	0.214765	3.12755	0.00176267	0.00723198	Up
Fam20a	ENSMUSG00000020614	208659	394	389	831	199	232	169	371.21	-0.980866	0.276055	-3.55315	0.00038065	0.00192034	Down
Abca8a	ENSMUSG00000041828	217258	2623	2329	3343	414	586	562	1501.87	-1.98207	0.188324	-10.5248	6.63974e-26	1.08074e-23	Down
Abca9	ENSMUSG00000041797	217262	1144	1142	1366	113	320	272	961.478	-1.96307	0.314422	-6.24341	4.28135e-10	8.32971e-09	Down
Abca6	ENSMUSG00000044749	76184	526	421	582	38	183	47	302.157	-2.10998	0.482397	-4.37394	1.22026e-05	9.28823e-05	Down
Map2k6	ENSMUSG00000020623	26399	48	26	44	11	9	15	41.7165	-1.31479	0.449226	-2.92679	0.00342481	0.0127644	Down
Kcnj2	ENSMUSG00000041695	16518	83	40	60	93	245	153	136.049	1.84406	0.436141	4.22811	2.35659e-05	0.000167296	Up
4732490B19Rik	ENSMUSG00000085421	319871	1	3	1	7	6	8	7.03361	2.47059	0.957023	2.58154	0.00983617	0.0311384	Up
D11Wsu47e	ENSMUSG00000041623	276852	182	148	193	245	287	288	232.236	1.07266	0.124836	8.59252	8.50851e-18	5.7513e-16	Up
Cpsf4l	ENSMUSG00000018727	52670	37	24	29	51	55	45	43.3251	1.16905	0.261801	4.46542	7.99111e-06	6.34363e-05	Up
Cdc42ep4	ENSMUSG00000041598	56699	2296	1480	1911	2085	2924	2058	2094.27	0.734884	0.160865	4.56833	4.91624e-06	4.09774e-05	Up
Ttyh2	ENSMUSG00000034714	117160	2158	1575	2260	1025	764	1076	1680.7	-0.62816	0.161196	-3.89686	9.74475e-05	0.000582452	Down
Kif19a	ENSMUSG00000010021	286942	54	71	61	12	19	30	66.8533	-1.20318	0.383024	-3.14126	0.00168224	0.0069482	Down
Btbd17	ENSMUSG00000000202	72014	10	24	14	3	6	2	18.7433	-1.74369	0.672307	-2.5936	0.00949783	0.030232	Down
Gprc5c	ENSMUSG00000051043	70355	351	509	697	200	158	258	461.787	-0.906948	0.252379	-3.5936	0.000326143	0.00167484	Down
Cd300lf	ENSMUSG00000047798	246746	21	39	24	411	281	465	254.951	4.18003	0.482285	8.66714	4.43096e-18	3.0664e-16	Up
Fads6	ENSMUSG00000044788	328035	98	105	134	33	67	38	83.4318	-0.873626	0.315866	-2.76581	0.00567809	0.0195963	Down
Hid1	ENSMUSG00000034586	217310	457	317	542	161	239	206	324.036	-0.685274	0.164261	-4.17186	3.0212e-05	0.000207386	Down
Cdr2l	ENSMUSG00000050910	237988	281	293	460	429	516	491	441.585	0.90496	0.174395	5.18913	2.11275e-07	2.441e-06	Up
Slc16a5	ENSMUSG00000045775	217316	28	26	47	11	15	6	16.5284	-1.22552	0.470625	-2.60403	0.00921357	0.0294886	Down
Jpt1	ENSMUSG00000020737	15374	1417	1398	1660	1757	1929	1822	1679.41	0.719256	0.13441	5.35122	8.73622e-08	1.08647e-06	Up
Tmem94	ENSMUSG00000020747	71947	1388	1066	1765	693	663	628	952.405	-0.650976	0.124398	-5.23303	1.66755e-07	1.96342e-06	Down
Smim5	ENSMUSG00000048442	66528	130	120	238	9	15	13	70.5785	-3.27957	0.402737	-8.1432	3.84977e-16	2.05045e-14	Down
Itgb4	ENSMUSG00000020758	192897	354	444	623	185	151	193	306.14	-0.994352	0.262461	-3.78857	0.000151516	0.00085966	Down
Acox1	ENSMUSG00000020777	11430	20173	20759	27067	31171	22180	24872	23868.8	0.632128	0.180653	3.49913	0.000466771	0.00230173	Up
Foxj1	ENSMUSG00000034227	15223	1	5	1	0	0	0	177.013	-3.26095	1.34648	-2.42184	0.0154423	0.0453834	Down
Sphk1	ENSMUSG00000061878	20698	118	69	61	1138	1712	901	686.98	4.32547	0.301038	14.3685	8.15656e-47	6.91472e-44	Up
Snhg20	ENSMUSG00000086859	76972	414	356	462	182	253	152	270.69	-0.649634	0.164406	-3.9514	7.76945e-05	0.000477575	Down
Septin9	ENSMUSG00000059248	53860	2068	1944	1915	2803	2893	3820	3440.59	1.09721	0.235858	4.65197	3.28781e-06	2.85871e-05	Up
Socs3	ENSMUSG00000053113	12702	395	270	365	4264	3311	3646	2073.95	3.87844	0.331358	11.7047	1.20622e-31	3.50597e-29	Up
Pgs1	ENSMUSG00000017715	74451	774	556	665	1535	1426	1570	1214.32	1.60859	0.137506	11.6983	1.30068e-31	3.72726e-29	Up
Dnah17	ENSMUSG00000033987	69926	55	36	58	79	72	74	67.8515	1.02393	0.20508	4.99283	5.94994e-07	6.17326e-06	Up
Timp2	ENSMUSG00000017466	21858	13982	11870	17583	5174	7114	4337	10736.4	-0.960098	0.242377	-3.96118	7.45795e-05	0.000461074	Down
C1qtnf1	ENSMUSG00000017446	56745	1347	1363	1156	1426	1431	1996	1837.17	0.735522	0.209703	3.50745	0.000452419	0.002238	Up
Cbx2	ENSMUSG00000025577	12416	127	103	167	46	47	45	82.9863	-1.09234	0.207112	-5.27413	1.33389e-07	1.59926e-06	Down
Cbx8	ENSMUSG00000025578	30951	166	145	202	73	90	86	129.324	-0.617143	0.164432	-3.75317	0.000174612	0.000974399	Down
Cbx4	ENSMUSG00000039989	12418	704	608	884	257	318	241	468.549	-1.00103	0.130528	-7.66913	1.73167e-14	6.96295e-13	Down
Tbc1d16	ENSMUSG00000039976	207592	584	447	869	223	345	251	422.48	-0.775799	0.194457	-3.98956	6.61968e-05	0.000414795	Down
Card14	ENSMUSG00000013483	170720	109	50	53	510	683	732	283.557	3.60354	0.370934	9.71479	2.60788e-22	3.06704e-20	Up
Baiap2	ENSMUSG00000025372	108100	2811	1636	1973	962	1147	857	1685.13	-0.691965	0.166613	-4.15313	3.27956e-05	0.000222123	Down
Aatk	ENSMUSG00000025375	11302	1016	481	467	119	255	170	411.045	-1.44266	0.347081	-4.15656	3.23073e-05	0.000219181	Down
Cep131	ENSMUSG00000039781	12009	259	187	289	122	103	112	177.939	-0.69255	0.147214	-4.70436	2.5466e-06	2.28654e-05	Down
Actg1	ENSMUSG00000062825	11465	14238	9638	12206	18831	15935	15978	17361.6	0.920854	0.219609	4.19315	2.75107e-05	0.000191427	Up
Oxld1	ENSMUSG00000039670	66431	257	204	249	121	96	82	142.429	-0.822768	0.186945	-4.40113	1.07689e-05	8.29627e-05	Down
Ccdc137	ENSMUSG00000049957	67291	443	436	509	620	598	618	577.38	0.825203	0.0922334	8.9469	3.65614e-19	2.82843e-17	Up
Arl16	ENSMUSG00000057594	70317	306	238	316	289	335	346	323.903	0.599094	0.13762	4.35326	1.34128e-05	0.000100998	Up
Slc25a10	ENSMUSG00000025792	27376	5365	2311	2289	772	884	749	2201.19	-1.63098	0.360289	-4.52686	5.98658e-06	4.89168e-05	Down
P4hb	ENSMUSG00000025130	18453	8738	8942	10073	10069	10018	13390	11289.2	0.690465	0.152911	4.51547	6.31753e-06	5.14557e-05	Up
Hmga1b	ENSMUSG00000078249	111241	12	9	18	81	42	57	51.9012	2.65436	0.526138	5.04499	4.53556e-07	4.84157e-06	Up
Dus1l	ENSMUSG00000025155	68730	658	503	630	816	938	750	725.024	0.905675	0.0984912	9.19549	3.73281e-20	3.31649e-18	Up
Ccdc57	ENSMUSG00000048445	71276	122	90	196	39	40	44	86.4114	-1.28332	0.264257	-4.85631	1.19592e-06	1.15453e-05	Down
Slc16a3	ENSMUSG00000025161	80879	65	64	70	241	202	298	215.257	2.31904	0.312277	7.42621	1.11755e-13	4.02438e-12	Up
Sectm1a	ENSMUSG00000025165	209588	2	3	0	13	13	11	35.5801	3.28376	0.873421	3.75966	0.000170146	0.000952089	Up
Hexdc	ENSMUSG00000039307	238023	294	189	274	124	106	103	176.17	-0.75268	0.185999	-4.0467	5.19447e-05	0.000335407	Down
Fn3k	ENSMUSG00000025175	63828	130	35	117	2	4	8	30.7442	-3.86884	0.759807	-5.09187	3.54549e-07	3.89404e-06	Down
Metrnl	ENSMUSG00000039208	210029	334	395	421	650	408	635	740.151	0.979666	0.33763	2.9016	0.00371268	0.0136277	Up
Klhl29	ENSMUSG00000020627	208439	213	181	248	328	388	391	430.829	1.21253	0.2521	4.80971	1.51151e-06	1.43238e-05	Up
Sdc1	ENSMUSG00000020592	20969	405	415	569	689	478	794	963.745	0.932034	0.371111	2.51147	0.012023	0.0367961	Up
Wdr35	ENSMUSG00000066643	74682	390	346	514	206	217	169	318.395	-0.648536	0.17742	-3.65537	0.000256813	0.00135964	Down
Lratd1	ENSMUSG00000020607	105005	111	94	245	58	21	18	74.1854	-1.74235	0.554702	-3.14105	0.00168344	0.00695035	Down
Lpin1	ENSMUSG00000020593	14245	19584	11466	16932	5584	6831	4327	9744.26	-1.09018	0.208842	-5.2201	1.78829e-07	2.09107e-06	Down
Rock2	ENSMUSG00000020580	19878	5321	6192	5701	4128	12175	5774	6081.65	0.747389	0.295138	2.53233	0.0113306	0.0350139	Up
2410004P03Rik	ENSMUSG00000071398	73667	5	2	2	3	14	6	39.5076	1.76447	0.708238	2.49135	0.0127258	0.0385872	Up
Pdia6	ENSMUSG00000020571	71853	3682	4166	4563	4201	4388	5475	5044.07	0.597159	0.152224	3.92288	8.7496e-05	0.000528875	Up
Atp6v1c2	ENSMUSG00000020566	68775	48	40	65	14	20	8	37.2054	-1.43671	0.341014	-4.21306	2.51937e-05	0.000177369	Down
Nol10	ENSMUSG00000061458	217431	400	319	330	686	514	629	523.751	1.22381	0.149489	8.18662	2.68675e-16	1.46948e-14	Up
Odc1	ENSMUSG00000011179	18263	1774	2270	2238	5854	5639	6288	4617.09	1.91162	0.206122	9.27419	1.78977e-20	1.66277e-18	Up
1700030C10Rik	ENSMUSG00000099759	69513	63	64	70	14	23	25	45.2803	-1.25294	0.370466	-3.38207	0.000719429	0.00335542	Down
Klf11	ENSMUSG00000020653	194655	811	819	1059	297	395	247	558.064	-1.09877	0.16866	-6.51474	7.28156e-11	1.61913e-09	Down
Cys1	ENSMUSG00000062563	12879	209	170	271	59	137	68	190.775	-0.877995	0.366317	-2.39681	0.0165383	0.0479721	Down
Rnf144a	ENSMUSG00000020642	108089	2024	1399	2662	800	687	811	1303.79	-0.95748	0.183199	-5.22645	1.72797e-07	2.02519e-06	Down
Colec11	ENSMUSG00000036655	71693	55	66	72	11	9	9	30.7559	-2.31688	0.374143	-6.19249	5.92199e-10	1.11978e-08	Down
Pxdn	ENSMUSG00000020674	69675	12695	8578	11002	2521	4705	4138	7362.89	-1.08641	0.214949	-5.05427	4.32045e-07	4.63873e-06	Down
Sntg2	ENSMUSG00000020672	268534	81	123	121	141	122	124	111.534	0.664031	0.260217	2.55184	0.0107156	0.0334131	Up
Alkal2	ENSMUSG00000054204	100294583	196	98	78	178	735	196	170.54	1.96311	0.54686	3.58978	0.000330955	0.00169698	Up
Fam110c	ENSMUSG00000036136	104943	430	204	336	993	1349	1154	653.015	2.28354	0.268959	8.49027	2.06156e-17	1.3487e-15	Up
Slc26a3	ENSMUSG00000001225	13487	18	7	9	1	0	0	52.6698	-4.55671	1.25829	-3.62134	0.000293086	0.00152354	Down
4933406C10Rik	ENSMUSG00000097494	74076	108	75	172	48	48	31	64.7085	-1.03575	0.287105	-3.60758	0.00030907	0.00159887	Down
Cdhr3	ENSMUSG00000035860	68764	5	12	9	0	4	1	65.3627	-1.97383	0.776077	-2.54335	0.0109795	0.0340959	Down
F730043M19Rik	ENSMUSG00000052125	320046	114	227	151	386	529	376	375.6	1.77292	0.312562	5.6722	1.40973e-08	2.08144e-07	Up
Hdac9	ENSMUSG00000004698	79221	145	192	151	65	76	100	168.94	-0.615746	0.233772	-2.63396	0.00843945	0.0273553	Down
Tspan13	ENSMUSG00000020577	66109	1691	1087	1389	572	461	549	948.081	-0.966611	0.181887	-5.31434	1.07042e-07	1.3049e-06	Down
Ankmy2	ENSMUSG00000036188	217473	684	644	818	367	335	306	503.368	-0.665644	0.104104	-6.39404	1.61561e-10	3.37833e-09	Down
Agmo	ENSMUSG00000050103	319660	1806	1782	2575	880	1180	896	1215.17	-0.634603	0.165669	-3.83054	0.000127861	0.000741157	Down
Dgkb	ENSMUSG00000036095	217480	26	24	29	3	4	4	11.5577	-2.423	0.561539	-4.31492	1.5966e-05	0.000117954	Down
Arl4a	ENSMUSG00000047446	11861	8037	4980	7219	2642	4006	3101	4131.92	-0.627172	0.261427	-2.39903	0.0164387	0.0477264	Down
Dnajb9	ENSMUSG00000014905	27362	1534	1396	1932	1962	1505	2384	1819.92	0.701391	0.177826	3.94426	8.0048e-05	0.000490559	Up
Nova1	ENSMUSG00000021047	664883	775	814	913	163	288	211	453.989	-1.50853	0.23933	-6.30315	2.91654e-10	5.81194e-09	Down
Heatr5a	ENSMUSG00000035181	320487	1154	975	1161	1314	1183	1696	1520.29	0.775522	0.257483	3.01194	0.00259587	0.010114	Up
Gpr33	ENSMUSG00000035148	14762	2	6	9	0	0	0	2.30864	-4.51704	1.5081	-2.99518	0.00274281	0.0105872	Down
Akap6	ENSMUSG00000061603	238161	23	14	27	2	11	5	11.4239	-1.40163	0.589258	-2.37864	0.0173766	0.0498863	Down
Baz1a	ENSMUSG00000035021	217578	1027	874	783	1441	1425	1715	1273.63	1.18297	0.170786	6.92663	4.30982e-12	1.21619e-10	Up
Rpl36al	ENSMUSG00000049751	66483	1123	1066	1144	1411	1142	1445	1338.61	0.682945	0.132984	5.13554	2.81335e-07	3.15375e-06	Up
Mgat2	ENSMUSG00000043998	217664	1231	1118	1221	1626	1513	1909	1565.31	0.919958	0.131832	6.97825	2.98888e-12	8.66265e-11	Up
Pole2	ENSMUSG00000020974	18974	54	42	47	80	40	78	68.9508	0.899375	0.370646	2.42651	0.0152449	0.0449515	Up
Klhdc1	ENSMUSG00000051890	271005	284	290	348	140	153	142	215.067	-0.66326	0.15161	-4.37477	1.21561e-05	9.2632e-05	Down
Vcpkmt	ENSMUSG00000049882	207965	93	92	97	110	124	100	113.824	0.659892	0.211162	3.12505	0.00177772	0.00728198	Up
Dmac2l	ENSMUSG00000054894	68055	282	242	316	136	143	125	191.344	-0.631459	0.151321	-4.17299	3.00633e-05	0.000206612	Down
Sav1	ENSMUSG00000021067	64010	3019	2976	4252	3501	5616	3505	3240.52	0.721793	0.170681	4.2289	2.3484e-05	0.000166774	Up
Frmd6	ENSMUSG00000048285	319710	1345	944	1369	378	367	323	774.714	-1.34425	0.213173	-6.30592	2.86492e-10	5.73153e-09	Down
Dact1	ENSMUSG00000044548	59036	189	190	285	30	100	75	192.196	-1.27546	0.305895	-4.16959	3.05144e-05	0.000209186	Down
L3hypdh	ENSMUSG00000019718	67217	1154	927	1233	526	468	369	631.308	-0.85397	0.205209	-4.16147	3.162e-05	0.000215308	Down
Rtn1	ENSMUSG00000021087	104001	220	175	319	78	139	44	168.38	-1.0233	0.394118	-2.59642	0.00942009	0.0300456	Down
Lrrc9	ENSMUSG00000021090	78257	77	41	67	5	5	14	31.7533	-2.50896	0.437234	-5.73826	9.56556e-09	1.45893e-07	Down
Dhrs7	ENSMUSG00000021094	66375	2730	1522	1716	576	737	670	1187.05	-1.16911	0.201293	-5.80799	6.3228e-09	9.97238e-08	Down
Six1	ENSMUSG00000051367	20471	372	327	406	171	150	132	244.255	-0.861936	0.215761	-3.99487	6.47289e-05	0.000407102	Down
Hif1a	ENSMUSG00000021109	15251	2281	2248	2420	3632	4472	4156	3649.17	1.23278	0.108938	11.3163	1.08924e-29	2.60726e-27	Up
Syne2	ENSMUSG00000063450	319565	3979	3484	5102	1732	1385	1939	3029.87	-0.877127	0.176744	-4.96271	6.95174e-07	7.13263e-06	Down
Mthfd1	ENSMUSG00000021048	108156	909	729	821	1007	831	915	897.157	0.58604	0.116537	5.0288	4.9357e-07	5.22486e-06	Up
Hspa2	ENSMUSG00000059970	15512	315	195	287	259	449	252	289.71	0.691139	0.254745	2.71306	0.00666642	0.022405	Up
Sptb	ENSMUSG00000021061	20741	221	158	236	230	444	224	241.566	0.966627	0.270417	3.57458	0.000350789	0.00178697	Up
Rab15	ENSMUSG00000021062	104886	333	316	229	375	434	782	523.008	1.26074	0.32362	3.89574	9.78975e-05	0.00058497	Up
Eif2s1	ENSMUSG00000021116	13665	1361	1397	1599	2494	2281	2439	2098.98	1.14813	0.0957657	11.9889	4.06217e-33	1.33305e-30	Up
Arg2	ENSMUSG00000021125	11847	3	11	6	36	29	49	41.5166	2.91753	0.494637	5.89833	3.67208e-09	6.0643e-08	Up
Zfp36l1	ENSMUSG00000021127	12192	1756	1714	2442	3426	3487	2880	2545.07	1.15669	0.164244	7.04252	1.88799e-12	5.65729e-11	Up
Actn1	ENSMUSG00000015143	109711	2077	2123	2298	4372	4284	4009	3872.3	1.37891	0.17233	8.00157	1.22844e-15	6.02263e-14	Up
Galnt16	ENSMUSG00000021130	108760	337	267	439	2021	1278	3934	1309.3	3.24181	0.386016	8.39812	4.53689e-17	2.74533e-15	Up
Erh	ENSMUSG00000021131	13877	617	442	553	829	745	892	761.786	1.04084	0.135717	7.66915	1.73144e-14	6.96295e-13	Up
Smoc1	ENSMUSG00000021136	64075	9465	8868	12847	3344	5304	4765	7027.66	-0.791884	0.189988	-4.16808	3.07173e-05	0.000210358	Down
Ttc9	ENSMUSG00000042734	69480	118	52	138	358	131	133	186.876	1.48473	0.572136	2.59507	0.00945715	0.0301449	Up
Rgs6	ENSMUSG00000021219	50779	45	60	64	5	11	11	37.6205	-2.23539	0.467602	-4.78055	1.74817e-06	1.63382e-05	Down
Papln	ENSMUSG00000021223	170721	137	78	145	34	54	38	111.136	-1.07958	0.272418	-3.96296	7.40263e-05	0.000457932	Down
Acot2	ENSMUSG00000021226	171210	779	518	932	355	346	253	431.364	-0.784106	0.190074	-4.12528	3.70287e-05	0.000247824	Down
Ptgr2	ENSMUSG00000072946	77219	3522	3083	4135	1565	1794	1681	2504.67	-0.665959	0.0916485	-7.26645	3.69062e-13	1.23097e-11	Down
Entpd5	ENSMUSG00000021236	12499	2462	1756	2637	919	743	939	1398.08	-0.960883	0.1428	-6.72889	1.70961e-11	4.26793e-10	Down
Bbof1	ENSMUSG00000057265	72873	89	94	142	56	43	48	74.1194	-0.711161	0.278248	-2.55586	0.0105927	0.0330752	Down
Arel1	ENSMUSG00000042350	68497	1254	1060	1284	1625	1040	1896	1449.7	0.773106	0.200404	3.85773	0.000114446	0.000672593	Up
Pgf	ENSMUSG00000004791	18654	152	95	66	95	286	143	177.268	1.13276	0.435104	2.60343	0.00922957	0.0295213	Up
Eif2b2	ENSMUSG00000004788	217715	621	538	624	739	761	742	728.789	0.751717	0.0810744	9.27195	1.82782e-20	1.6904e-18	Up
Zc2hc1c	ENSMUSG00000045064	72350	29	29	42	18	10	5	31.0328	-1.16909	0.40943	-2.8554	0.0042983	0.015462	Down
Fos	ENSMUSG00000021250	14281	418	192	300	1128	761	623	724.681	1.9065	0.5085	3.74926	0.000177357	0.000986202	Up
Batf	ENSMUSG00000034266	53314	25	37	33	38	40	47	43.3629	0.808187	0.305659	2.64408	0.00819137	0.0266684	Up
Flvcr2	ENSMUSG00000034258	217721	163	75	279	43	37	29	73.5725	-1.77329	0.447827	-3.95976	7.5024e-05	0.000463118	Down
Tgfb3	ENSMUSG00000021253	21809	717	689	930	207	411	277	585.234	-0.967232	0.30338	-3.18819	0.00143168	0.00603585	Down
Ngb	ENSMUSG00000021032	64242	28	14	27	5	2	4	12.2133	-2.20125	0.738337	-2.98137	0.00286964	0.0109975	Down
Gstz1	ENSMUSG00000021033	14874	21247	14410	19472	10047	10305	6321	11304.9	-0.620882	0.231657	-2.68018	0.00735828	0.0243711	Down
Ahsa1	ENSMUSG00000021037	217737	1086	969	1113	1369	1448	1654	1399.44	0.917636	0.124766	7.35484	1.91155e-13	6.64827e-12	Up
Sptlc2	ENSMUSG00000021036	20773	1669	1663	1782	2138	2532	2014	1982.66	0.799219	0.11416	7.00085	2.54409e-12	7.4585e-11	Up
Dio2	ENSMUSG00000007682	13371	7	5	11	41	38	64	31.3127	3.08111	0.628799	4.9	9.5839e-07	9.49338e-06	Up
Cep128	ENSMUSG00000061533	75216	284	212	320	105	82	93	170.57	-1.10952	0.172827	-6.41984	1.36416e-10	2.87917e-09	Down
Tshr	ENSMUSG00000020963	22095	7148	4885	6726	2311	2043	2753	3583.34	-0.966843	0.165095	-5.85629	4.73318e-09	7.6673e-08	Down
Flrt2	ENSMUSG00000047414	399558	1514	1068	2325	796	764	532	1263.45	-0.779812	0.321729	-2.42381	0.0153585	0.0452023	Down
Spata7	ENSMUSG00000021007	104871	170	139	199	78	107	66	126.679	-0.59259	0.218119	-2.71682	0.00659124	0.0221992	Down
Eml5	ENSMUSG00000051166	319670	668	654	826	212	231	135	343.366	-1.47365	0.22809	-6.46081	1.04142e-10	2.24933e-09	Down
Ttc8	ENSMUSG00000021013	76260	622	489	723	167	178	190	354.878	-1.34684	0.122276	-11.0148	3.2428e-28	6.46842e-26	Down
Foxn3	ENSMUSG00000033713	71375	369	349	456	186	174	164	269.047	-0.738208	0.149398	-4.94123	7.7632e-07	7.86213e-06	Down
Kcnk13	ENSMUSG00000045404	217826	43	58	61	99	141	141	106.077	1.64475	0.347141	4.73799	2.15845e-06	1.97463e-05	Up
Gpr68	ENSMUSG00000047415	238377	86	76	97	132	71	106	120.51	0.686774	0.262989	2.61142	0.00901671	0.0289451	Up
Ccdc88c	ENSMUSG00000021182	68339	908	727	758	250	461	350	658.101	-0.764513	0.196893	-3.88288	0.000103225	0.000614276	Down
Fbln5	ENSMUSG00000021186	23876	1950	2523	3233	2465	3825	3242	3105.14	0.723543	0.235566	3.07151	0.0021298	0.00850166	Up
Cpsf2	ENSMUSG00000041781	51786	762	698	751	881	849	932	876.463	0.686406	0.119873	5.72609	1.0277e-08	1.55693e-07	Up
Gm20604	ENSMUSG00000041716	100859931	47	51	52	58	68	59	57.4349	0.717668	0.257256	2.7897	0.00527569	0.0183989	Up
Unc79	ENSMUSG00000021198	217843	28	47	12	38	177	88	126.087	2.13994	0.56003	3.82112	0.000132849	0.000765025	Up
Asb2	ENSMUSG00000021200	65256	16	42	22	4	10	10	18.441	-1.36253	0.552427	-2.46644	0.0136465	0.0409395	Down
Ifi27l2b	ENSMUSG00000021208	217845	19	32	24	10	4	9	13.2309	-1.2991	0.536987	-2.41925	0.0155526	0.0456285	Down
Ppp4r4	ENSMUSG00000021209	74521	352	258	364	68	76	56	143.041	-1.85606	0.28236	-6.57338	4.91848e-11	1.1282e-09	Down
Serpina1a	ENSMUSG00000066366	20700	65	159	92	16	20	14	56.9905	-2.28507	0.420572	-5.43324	5.53403e-08	7.2038e-07	Down
Serpina1c	ENSMUSG00000079015	20702	7	24	8	3	1	4	12.8015	-1.91728	0.795711	-2.40951	0.0159737	0.0466554	Down
Serpina3c	ENSMUSG00000066361	16625	5906	4983	6354	20383	30578	13792	11553.6	2.324	0.217025	10.7084	9.29293e-27	1.64412e-24	Up
Serpina3g	ENSMUSG00000041481	20715	80	117	74	178	409	86	135.208	1.6801	0.489006	3.43573	0.000590955	0.00282774	Up
Serpina3i	ENSMUSG00000079014	628900	44	36	65	1323	1274	568	448.379	4.88387	0.386623	12.6321	1.40447e-36	6.21203e-34	Up
Serpina3j	ENSMUSG00000079013	238395	70	23	80	11	0	5	20.4121	-2.94642	0.878962	-3.35216	0.000801835	0.00367933	Down
Serpina3m	ENSMUSG00000079012	20717	166	125	108	7316	12509	4618	3645.74	6.33425	0.383015	16.5378	1.95915e-61	3.62372e-58	Up
Serpina3k	ENSMUSG00000058207	20714	267	842	363	2989	5451	2086	1722.67	3.1794	0.804493	3.95206	7.74825e-05	0.00047656	Up
Serpina3n	ENSMUSG00000021091	20716	14134	12492	11763	149288	192938	142417	87147.4	4.0644	0.176199	23.0671	9.91448e-118	1.0086e-113	Up
Syne3	ENSMUSG00000054150	212073	1217	1289	2725	606	627	560	945.698	-1.09526	0.259736	-4.2168	2.47788e-05	0.000174931	Down
Bdkrb2	ENSMUSG00000021070	12062	17	11	12	27	25	21	23.348	1.28971	0.428863	3.00728	0.00263593	0.0102427	Up
Bdkrb1	ENSMUSG00000041347	12061	7	4	8	55	19	39	31.7964	3.01898	0.564688	5.34627	8.97838e-08	1.11591e-06	Up
Hhipl1	ENSMUSG00000021260	214305	78	34	53	70	118	86	86.8883	1.15876	0.35008	3.30999	0.000932995	0.0041886	Up
Begain	ENSMUSG00000040867	380785	24	15	38	54	38	34	34.6344	1.15765	0.355042	3.26062	0.0011117	0.00487578	Up
Meg3	ENSMUSG00000021268	17263	1263	1009	1890	578	642	296	1171.78	-1.01837	0.256493	-3.97036	7.17641e-05	0.000445836	Down
Mirg	ENSMUSG00000097391	100040724	26	29	47	12	11	15	29.374	-0.991092	0.406953	-2.43539	0.0148755	0.0440165	Down
Dio3	ENSMUSG00000075707	107585	15	8	8	47	14	73	58.2608	2.54817	0.695877	3.66181	0.000250435	0.00133108	Up
Hsp90aa1	ENSMUSG00000021270	15519	5656	6229	6106	12554	9222	12259	9976.18	1.33554	0.195297	6.8385	8.00248e-12	2.13113e-10	Up
Cinp	ENSMUSG00000021276	67236	512	435	549	613	577	703	627.293	0.765861	0.129021	5.93591	2.92211e-09	4.91949e-08	Up
Traf3	ENSMUSG00000021277	22031	532	481	550	577	616	722	683.588	0.713668	0.123091	5.79787	6.71608e-09	1.05193e-07	Up
Tnfaip2	ENSMUSG00000021281	21928	496	600	562	1550	1731	2202	1443.17	2.13393	0.238419	8.95035	3.5435e-19	2.75176e-17	Up
Ckb	ENSMUSG00000001270	12709	1486	916	1054	339	315	397	1064.01	-1.29154	0.308487	-4.18671	2.83024e-05	0.000196092	Down
Trmt61a	ENSMUSG00000060950	328162	186	153	151	480	391	461	358.248	1.86257	0.160929	11.5739	5.59002e-31	1.49651e-28	Up
Xrcc3	ENSMUSG00000021287	74335	771	508	674	245	290	243	409.193	-0.902217	0.13918	-6.48237	9.02909e-11	1.97746e-09	Down
Zfyve21	ENSMUSG00000021286	68520	756	451	689	242	273	245	401.584	-0.886464	0.15442	-5.74061	9.43373e-09	1.44206e-07	Down
A530016L24Rik	ENSMUSG00000043122	319942	7822	3604	7173	445	317	273	2611.64	-3.71663	0.452225	-8.21855	2.05984e-16	1.1482e-14	Down
Tmem179	ENSMUSG00000054013	104885	2901	1032	2796	104	219	75	881.347	-3.6373	0.740128	-4.91442	8.90447e-07	8.8722e-06	Down
Pld4	ENSMUSG00000052160	104759	856	1129	1019	329	265	413	799.52	-1.16734	0.31672	-3.68572	0.00022806	0.00122787	Down
Clba1	ENSMUSG00000037594	217887	55	36	62	82	65	73	79.7167	0.957703	0.225221	4.25227	2.11611e-05	0.000151718	Up
Cdca4	ENSMUSG00000047832	71963	320	293	346	427	330	381	391.963	0.671749	0.145562	4.61486	3.93358e-06	3.34865e-05	Up
Crip2	ENSMUSG00000006356	68337	2532	2043	2516	3008	2996	4268	3377.82	0.961107	0.155186	6.19327	5.89278e-10	1.1153e-08	Up
Crip1	ENSMUSG00000006360	12925	3430	2041	4413	1640	999	1334	2494.25	-0.856668	0.231791	-3.69587	0.000219134	0.0011883	Down
Ighg2b	ENSMUSG00000076613	16016	71	111	97	2	1	8	65.3136	-4.25736	0.645287	-6.59763	4.17791e-11	9.72583e-10	Down
Ighd	ENSMUSG00000104213	380797	43	180	100	9	15	21	61.9722	-2.47863	0.615906	-4.02437	5.71285e-05	0.000364598	Down
Ighm	ENSMUSG00000076617	16019	5390	10976	2100	791	2188	363	4133.11	-2.15379	0.764087	-2.81878	0.00482061	0.0170367	Down
Ighv2-2	ENSMUSG00000096464	777686	1	16	5	0	0	0	5.17233	-4.98819	2.03918	-2.44618	0.014438	0.0429404	Down
Ighv11-2	ENSMUSG00000096108	780818	48	78	95	8	10	2	50.2522	-3.05457	0.725943	-4.20772	2.57955e-05	0.000180978	Down
Ighv7-3	ENSMUSG00000076652	629822	32	13	2	0	0	0	4.21761	-6.01872	2.45464	-2.45197	0.0142075	0.0423976	Down
Ighv1-53	ENSMUSG00000093894	780931	3	19	16	0	2	0	8.21426	-3.88061	1.60137	-2.4233	0.01538	0.0452526	Down
Ighv1-78	ENSMUSG00000096326	213570	45	32	0	0	0	0	7.15808	-6.7628	2.14099	-3.15872	0.00158464	0.00660405	Down
Vipr2	ENSMUSG00000011171	22355	26	23	19	4	10	5	18.2386	-1.43471	0.519651	-2.76092	0.00576392	0.0198498	Down
Ncapg2	ENSMUSG00000042029	76044	287	196	321	102	95	93	174.048	-1.03371	0.263264	-3.92651	8.61885e-05	0.000522524	Down
Itgb8	ENSMUSG00000025321	320910	33	26	39	93	151	41	66.3804	1.95838	0.469745	4.16904	3.05885e-05	0.000209617	Up
Asb13	ENSMUSG00000033781	142688	791	664	761	344	413	289	499.42	-0.665737	0.122529	-5.43328	5.5327e-08	7.2038e-07	Down
Akr1c14	ENSMUSG00000033715	105387	194	106	174	35	54	33	102.627	-1.52718	0.260444	-5.86377	4.52473e-09	7.35306e-08	Down
Akr1c19	ENSMUSG00000071551	432720	1	7	7	0	0	0	16.4622	-4.3524	1.34257	-3.24183	0.00118764	0.00515546	Down
Gtpbp4	ENSMUSG00000021149	69237	1042	1148	1531	1761	1333	1786	1509.72	0.82182	0.156175	5.26218	1.42357e-07	1.69677e-06	Up
Chrm3	ENSMUSG00000046159	12671	46	32	53	12	13	8	26.5085	-1.55618	0.433831	-3.58707	0.000334412	0.00171168	Down
Heatr1	ENSMUSG00000050244	217995	584	536	520	1388	1064	1410	1009.33	1.65333	0.166375	9.9374	2.86207e-23	3.70902e-21	Up
Ero1b	ENSMUSG00000057069	67475	333	412	331	158	159	175	273.173	-0.727184	0.237533	-3.0614	0.00220302	0.00875785	Down
Inhba	ENSMUSG00000041324	16323	15	8	21	51	40	58	42.0341	2.19792	0.3302	6.65633	2.80749e-11	6.71224e-10	Up
Sugct	ENSMUSG00000055137	192136	145	117	237	65	63	62	95.3772	-0.948834	0.241877	-3.92279	8.75294e-05	0.00052892	Down
Yae1d1	ENSMUSG00000075054	67008	424	378	411	493	420	507	463.801	0.648494	0.129165	5.02068	5.14896e-07	5.43647e-06	Up
Amph	ENSMUSG00000021314	218038	73	49	63	11	6	12	32.3927	-2.24239	0.456339	-4.91388	8.92909e-07	8.88803e-06	Down
Gpr141b	ENSMUSG00000047462	319293	31	43	43	7	6	7	23.4138	-2.13442	0.448388	-4.76021	1.93389e-06	1.78525e-05	Down
Gpr141	ENSMUSG00000053101	353346	20	17	10	35	22	36	23.5721	1.39391	0.509917	2.73361	0.0062644	0.0213065	Up
Zkscan4	ENSMUSG00000054931	544922	99	93	112	42	37	39	63.397	-0.942254	0.259024	-3.63771	0.000275069	0.00144241	Down
H4c8	ENSMUSG00000060981	69386	164	162	187	378	307	286	240.968	1.34271	0.232036	5.78662	7.18161e-09	1.11455e-07	Up
H3c7	ENSMUSG00000100210	260423	3	8	1	14	17	7	9.22745	2.03477	0.704874	2.88672	0.0038928	0.0142093	Up
H1f3	ENSMUSG00000052565	14957	2	3	1	6	5	8	5.45224	2.07231	0.839414	2.46876	0.0135581	0.0407207	Up
H4c4	ENSMUSG00000061482	319156	1	4	1	6	6	6	5.4174	1.98447	0.831268	2.38728	0.0169734	0.0490263	Up
H2bc6	ENSMUSG00000047246	319179	111	198	198	217	244	212	225.206	0.81505	0.292371	2.78772	0.005308	0.0185008	Up
H2bc4	ENSMUSG00000018102	68024	1375	1350	1307	1498	1576	1840	1632.77	0.697627	0.152085	4.58709	4.49457e-06	3.77878e-05	Up
H4c3	ENSMUSG00000060678	319155	3	4	5	7	8	12	8.90937	1.59358	0.655194	2.43223	0.0150063	0.0443519	Up
Ripor2	ENSMUSG00000036006	193385	77	174	98	175	143	169	167.051	0.862439	0.338727	2.54612	0.0108928	0.033898	Up
Gpld1	ENSMUSG00000021340	14756	649	569	687	824	985	596	644.281	0.753738	0.217483	3.46574	0.00052878	0.00256584	Up
E2f3	ENSMUSG00000016477	13557	366	366	352	400	415	427	434.482	0.609714	0.128566	4.74242	2.11184e-06	1.93547e-05	Up
Irf4	ENSMUSG00000021356	16364	983	1170	2340	110	180	138	564.168	-2.9516	0.435926	-6.77088	1.28006e-11	3.28839e-10	Down
Foxq1	ENSMUSG00000038415	15220	9	5	14	1	1	0	5.53674	-3.35766	1.23516	-2.7184	0.00655994	0.0221243	Down
Foxc1	ENSMUSG00000050295	17300	235	203	313	297	310	262	250.375	0.641261	0.15568	4.11911	3.80346e-05	0.000253888	Up
Serpinb6a	ENSMUSG00000060147	20719	3261	3453	3886	4499	4603	6214	5323.16	0.950368	0.202744	4.68753	2.76519e-06	2.45786e-05	Up
Ripk1	ENSMUSG00000021408	19766	878	837	955	1066	1121	1042	1023.57	0.693348	0.091445	7.58214	3.3991e-14	1.30739e-12	Up
Slc22a23	ENSMUSG00000038267	73102	1300	1004	1760	217	286	177	575.815	-2.14441	0.214052	-10.0182	1.26822e-23	1.70881e-21	Down
Pxdc1	ENSMUSG00000021411	66895	871	954	826	837	1386	884	1001.43	0.6254	0.209081	2.99118	0.00277898	0.0107045	Up
Eci3	ENSMUSG00000021416	69123	430	345	494	194	193	157	224.534	-0.792167	0.283073	-2.79845	0.00513479	0.0179939	Down
Ppp1r3g	ENSMUSG00000050423	76487	5	4	7	0	0	1	2.7283	-3.46113	1.43012	-2.42018	0.0155129	0.0455318	Down
F13a1	ENSMUSG00000039109	74145	4663	4102	4779	3996	5260	6909	5247.98	0.675211	0.259392	2.60305	0.00923976	0.0295492	Up
Dsp	ENSMUSG00000054889	109620	28	44	47	9	3	5	137.931	-2.38852	0.499283	-4.7839	1.71923e-06	1.60899e-05	Down
Bmp6	ENSMUSG00000039004	12161	984	787	1102	352	405	307	666.159	-1.0063	0.207895	-4.84045	1.29548e-06	1.24154e-05	Down
Bloc1s5	ENSMUSG00000038982	17828	564	452	616	211	323	269	375.014	-0.600006	0.152132	-3.94399	8.0136e-05	0.000490742	Down
Eef1e1	ENSMUSG00000001707	66143	276	251	284	442	341	472	398.422	1.05415	0.167053	6.31026	2.78563e-10	5.5949e-09	Up
Gcnt2	ENSMUSG00000021360	14538	1105	1278	1245	6422	7439	8684	4683.1	3.04542	0.14823	20.5453	8.48678e-94	4.3168e-90	Up
A730081D07Rik	ENSMUSG00000086693	102633880	15	9	11	36	38	30	30.0601	1.99387	0.374876	5.31874	1.04486e-07	1.2768e-06	Up
Pak1ip1	ENSMUSG00000038683	68083	1173	922	957	2514	1819	2498	1820.39	1.58492	0.173774	9.12057	7.47279e-20	6.30877e-18	Up
Edn1	ENSMUSG00000021367	13614	203	205	399	408	433	302	466.86	0.94404	0.254628	3.70753	0.000209294	0.0011447	Up
Phactr1	ENSMUSG00000054728	218194	308	251	277	51	153	57	179.622	-1.27831	0.333927	-3.8281	0.000129137	0.000747062	Down
Gfod1	ENSMUSG00000051335	328232	1022	1275	1146	433	693	535	829.069	-0.6532	0.210284	-3.10627	0.00189462	0.0076942	Down
Sirt5	ENSMUSG00000054021	68346	238	169	253	91	119	83	144.639	-0.744056	0.166556	-4.46731	7.92087e-06	6.29524e-05	Down
Cd83	ENSMUSG00000015396	12522	218	345	226	35	64	77	214.707	-1.78095	0.414825	-4.29325	1.76079e-05	0.00012896	Down
Stmnd1	ENSMUSG00000063529	380842	11	4	5	0	0	1	8.47097	-3.79047	1.36662	-2.77362	0.00554367	0.0192116	Down
Cap2	ENSMUSG00000021373	67252	46	63	56	22	18	8	35.6838	-1.37585	0.450838	-3.05177	0.00227497	0.00900869	Down
Tpmt	ENSMUSG00000021376	22017	332	255	375	400	751	235	358.183	0.943621	0.314216	3.0031	0.00267244	0.0103608	Up
Rnf144b	ENSMUSG00000038068	218215	4317	1787	2873	437	958	363	1217.32	-1.92993	0.33298	-5.79592	6.79479e-09	1.06344e-07	Down
Id4	ENSMUSG00000021379	15904	90	68	137	22	41	22	65.1277	-1.35886	0.325128	-4.17946	2.92203e-05	0.000201395	Down
Ptpdc1	ENSMUSG00000038042	218232	494	439	552	195	243	175	336.272	-0.856018	0.158697	-5.39404	6.88925e-08	8.82675e-07	Down
Wnk2	ENSMUSG00000037989	75607	23	22	33	5	9	2	94.222	-1.86114	0.503461	-3.69669	0.000218431	0.00118512	Down
Susd3	ENSMUSG00000021384	66329	75	82	92	18	22	30	84.3227	-1.41278	0.368201	-3.83698	0.000124556	0.000724683	Down
Ippk	ENSMUSG00000021385	75678	324	252	298	372	297	319	319.446	0.601968	0.134114	4.48847	7.17349e-06	5.76429e-05	Up
Ecm2	ENSMUSG00000043631	407800	1091	801	927	122	278	145	527.479	-1.9619	0.256477	-7.64943	2.01865e-14	8.05324e-13	Down
Aspn	ENSMUSG00000021388	66695	1018	939	1035	206	526	465	917.849	-0.913835	0.274089	-3.33408	0.000855808	0.00389122	Down
Ogn	ENSMUSG00000021390	18295	2882	3275	3916	400	852	454	2084.25	-2.15517	0.298025	-7.2315	4.777e-13	1.56763e-11	Down
Nol8	ENSMUSG00000021392	70930	574	523	589	790	702	867	717.199	0.906605	0.124119	7.30434	2.78637e-13	9.40157e-12	Up
Iars	ENSMUSG00000037851	105148	1045	884	1146	1884	1730	1661	1520.78	1.20527	0.108317	11.1273	9.23907e-29	1.99977e-26	Up
Cks2	ENSMUSG00000062248	66197	35	35	37	104	45	157	88.1095	1.94521	0.502467	3.87132	0.00010825	0.000640432	Up
Secisbp2	ENSMUSG00000035139	75420	567	480	591	711	539	662	628.123	0.650764	0.135656	4.79716	1.60935e-06	1.51589e-05	Up
Gadd45g	ENSMUSG00000021453	23882	724	1176	763	1888	1650	1783	1792.21	1.38688	0.312269	4.44129	8.94215e-06	7.01647e-05	Up
Diras2	ENSMUSG00000047842	68203	49	68	66	2	3	0	47.799	-4.78657	0.738442	-6.48198	9.05277e-11	1.98051e-09	Down
Nfil3	ENSMUSG00000056749	18030	104	78	76	424	766	445	342.767	3.06915	0.308934	9.93463	2.94256e-23	3.78919e-21	Up
Cplx2	ENSMUSG00000025867	12890	234	212	275	76	66	59	149.294	-1.41664	0.250477	-5.65578	1.55137e-08	2.2708e-07	Down
Nop16	ENSMUSG00000025869	28126	390	341	402	991	831	960	723.922	1.72056	0.129884	13.2469	4.70243e-40	2.98987e-37	Up
Cltb	ENSMUSG00000047547	74325	1872	1828	2079	3171	3563	3404	2918.7	1.22852	0.0984777	12.4751	1.02107e-35	4.07347e-33	Up
5330429C05Rik	ENSMUSG00000085896	78071	0	0	0	2	4	4	2.12955	4.59206	1.74844	2.62638	0.0086298	0.0278834	Up
Prr7	ENSMUSG00000034686	432763	23	24	21	32	26	38	29.161	0.914348	0.349103	2.61914	0.00881529	0.0283881	Up
Dbn1	ENSMUSG00000034675	56320	802	668	1071	738	1423	971	1080.73	0.727541	0.201512	3.61041	0.000305714	0.00158311	Up
Pdlim7	ENSMUSG00000021493	67399	964	935	1003	1445	1505	1601	1583.63	1.06657	0.0869239	12.2702	1.3095e-34	4.93392e-32	Up
Fam193b	ENSMUSG00000021495	212483	2086	1896	2729	941	996	919	1451.36	-0.803175	0.10397	-7.72506	1.11803e-14	4.66134e-13	Down
Tmed9	ENSMUSG00000058569	67511	1794	1498	1772	2267	1970	2569	2189.23	0.851749	0.136686	6.23142	4.62239e-10	8.89755e-09	Up
Cxcl14	ENSMUSG00000021508	57266	105	79	60	804	569	888	682.54	3.62527	0.408943	8.86497	7.65247e-19	5.70319e-17	Up
Tgfbi	ENSMUSG00000035493	21810	2178	1632	2310	3976	1968	4405	3023.71	1.20017	0.325118	3.69151	0.000222927	0.00120726	Up
Gas1	ENSMUSG00000052957	14451	2396	1655	3206	618	470	445	1369.36	-1.79392	0.306302	-5.85672	4.72112e-09	7.65996e-08	Down
4930486L24Rik	ENSMUSG00000050345	214639	148	145	160	169	218	216	174.832	0.830245	0.15136	5.48523	4.12926e-08	5.51635e-07	Up
Ctla2b	ENSMUSG00000074874	13025	386	335	336	301	655	359	367.122	0.716739	0.251054	2.85492	0.00430476	0.0154825	Up
Ctla2a	ENSMUSG00000044258	13024	1338	940	1489	2192	4452	2690	2152.8	1.73327	0.238929	7.25435	4.03594e-13	1.33088e-11	Up
Platr25	ENSMUSG00000074863	435366	10	8	10	3	1	1	5.08704	-2.05901	0.83122	-2.4771	0.0132456	0.0399073	Down
Gm5141	ENSMUSG00000091183	380850	75	81	99	24	35	41	59.4835	-0.930185	0.279985	-3.32227	0.000892885	0.00403166	Down
Fancc	ENSMUSG00000021461	14088	319	321	444	154	165	145	245.461	-0.797737	0.187267	-4.25988	2.04535e-05	0.000147309	Down
Ptch1	ENSMUSG00000021466	19206	1013	1124	1278	567	466	543	880.082	-0.694695	0.173833	-3.99633	6.43332e-05	0.000404863	Down
1810034E14Rik	ENSMUSG00000097101	66503	66	32	48	16	23	19	37.7388	-0.90323	0.349313	-2.58573	0.0097172	0.0308141	Down
Ctsl	ENSMUSG00000021477	13039	8584	8708	8908	10016	15638	11734	14554.9	0.919172	0.258906	3.55022	0.000384912	0.00193991	Up
Cdk20	ENSMUSG00000021483	105278	159	113	141	165	237	198	192.753	0.959158	0.300459	3.19231	0.00141142	0.00596401	Up
Zfp493	ENSMUSG00000090659	72958	52	63	45	48	87	73	64.3884	0.776032	0.285439	2.71873	0.00655338	0.022112	Up
Gm9625	ENSMUSG00000097906	674597	55	57	65	76	60	73	68.656	0.662647	0.257457	2.57382	0.0100584	0.0317185	Up
Mtrr	ENSMUSG00000034617	210009	375	316	383	407	431	463	430.164	0.699536	0.0975495	7.17109	7.44003e-13	2.3542e-11	Up
Adcy2	ENSMUSG00000021536	210044	4	9	7	10	12	19	16.403	1.4469	0.544541	2.6571	0.00788156	0.0258226	Up
Nsun2	ENSMUSG00000021595	28114	1232	1142	1591	2151	1563	1941	1754.2	0.945963	0.149527	6.32638	2.50984e-10	5.09124e-09	Up
Srd5a1	ENSMUSG00000021594	78925	39	34	49	12	19	18	35.3509	-0.890406	0.343605	-2.59137	0.00955957	0.0303952	Down
Adamts16	ENSMUSG00000049538	271127	16	35	35	2	2	1	27.945	-3.69595	0.778424	-4.74799	2.05446e-06	1.88884e-05	Down
Tert	ENSMUSG00000021611	21752	40	40	29	13	19	13	29.5344	-0.870041	0.339204	-2.56495	0.0103191	0.0324001	Down
Tppp	ENSMUSG00000021573	72948	2610	1940	3938	823	300	565	1282.87	-1.86807	0.334634	-5.58244	2.3717e-08	3.34173e-07	Down
Cep72	ENSMUSG00000021572	74470	109	104	127	42	33	40	72.0921	-1.14008	0.208115	-5.4781	4.29916e-08	5.71331e-07	Down
Glrx	ENSMUSG00000021591	93692	204	154	212	717	653	789	525.318	2.35281	0.312104	7.53854	4.75249e-14	1.79729e-12	Up
Ttc37	ENSMUSG00000033991	218343	526	445	489	642	583	691	608.209	0.813219	0.156641	5.1916	2.08493e-07	2.41297e-06	Up
Mctp1	ENSMUSG00000021596	78771	133	185	197	71	33	58	133.25	-1.24641	0.337774	-3.69007	0.000224192	0.00121282	Down
Nr2f1	ENSMUSG00000069171	13865	321	233	441	139	143	119	202.216	-0.870429	0.182898	-4.75908	1.94474e-06	1.79445e-05	Down
9330111N05Rik	ENSMUSG00000097098	319983	50	32	35	3	5	6	14.8444	-2.64341	0.565503	-4.67444	2.94752e-06	2.59275e-05	Down
Polr3g	ENSMUSG00000035834	67486	175	105	158	242	233	276	222.667	1.21182	0.224568	5.39621	6.80627e-08	8.72592e-07	Up
Mblac2	ENSMUSG00000051098	72852	443	290	403	115	155	114	228.094	-1.13907	0.157977	-7.21038	5.57979e-13	1.80201e-11	Down
Mef2c	ENSMUSG00000005583	17260	827	827	813	336	371	383	658.559	-0.766466	0.138604	-5.52989	3.20439e-08	4.36681e-07	Down
Vcan	ENSMUSG00000021614	13003	899	524	880	3789	2795	4068	2447.55	2.65441	0.264337	10.0418	9.98646e-24	1.37287e-21	Up
Tmem167	ENSMUSG00000012422	66074	1195	979	995	1307	1356	1535	1406.09	0.822036	0.142976	5.74948	8.95176e-09	1.37355e-07	Up
Mtx3	ENSMUSG00000021704	382793	1000	808	1085	476	468	486	693.501	-0.589017	0.0992107	-5.93704	2.9022e-09	4.89214e-08	Down
Cmya5	ENSMUSG00000047419	76469	41	38	47	4	16	8	32.4218	-1.75399	0.406369	-4.31625	1.58701e-05	0.00011733	Down
Homer1	ENSMUSG00000007617	26556	197	183	174	215	178	295	232.318	0.729693	0.244313	2.98671	0.00281995	0.0108356	Up
Lhfpl2	ENSMUSG00000045312	218454	3081	3888	2890	601	708	958	3225.19	-1.7244	0.291444	-5.91675	3.28363e-09	5.48063e-08	Down
Pde8b	ENSMUSG00000021684	218461	115	112	131	32	46	33	84.8439	-1.2724	0.260324	-4.88774	1.02001e-06	1.00207e-05	Down
F2rl1	ENSMUSG00000021678	14063	94	146	124	41	25	45	85.4993	-1.30509	0.303386	-4.30176	1.6945e-05	0.000124463	Down
Hmgcr	ENSMUSG00000021670	15357	400	383	425	501	375	512	520.04	0.623449	0.203851	3.05835	0.00222556	0.00884399	Up
Enc1	ENSMUSG00000041773	13803	1363	2863	2448	5811	6993	6750	5365.37	1.9452	0.258659	7.52034	5.46328e-14	2.05097e-12	Up
Lncenc1	ENSMUSG00000078952	100039691	20	34	34	159	120	145	95.8802	2.68559	0.353057	7.60667	2.81246e-14	1.09412e-12	Up
Utp15	ENSMUSG00000041747	105372	446	415	447	557	440	532	509.915	0.646476	0.124461	5.19423	2.05574e-07	2.3819e-06	Up
Mccc2	ENSMUSG00000021646	78038	3338	2608	3279	1912	1432	1053	1872	-0.641315	0.213496	-3.00388	0.0026656	0.0103382	Down
Ocln	ENSMUSG00000021638	18260	9	15	11	2	3	0	16.2835	-2.40581	0.797521	-3.01661	0.00255617	0.00997846	Down
Ccdc125	ENSMUSG00000048924	76041	244	205	248	88	137	76	164.989	-0.795782	0.230444	-3.45326	0.000553859	0.00267034	Down
Pik3r1	ENSMUSG00000041417	18708	9176	5893	9958	3902	2448	3921	4889.68	-0.83745	0.241302	-3.47054	0.000519408	0.00252578	Down
Cd180	ENSMUSG00000021624	17079	146	261	160	53	52	81	299.249	-1.22275	0.507103	-2.41125	0.0158978	0.0464603	Down
Nln	ENSMUSG00000021710	75805	1587	1238	1262	1801	1974	1531	1628.32	0.790425	0.172606	4.57936	4.66407e-06	3.90676e-05	Up
Cenpk	ENSMUSG00000021714	60411	38	26	34	9	17	14	25.6401	-0.870411	0.35959	-2.42056	0.0154965	0.0455032	Down
Rgs7bp	ENSMUSG00000021719	52882	452	400	415	84	134	89	230.203	-1.63701	0.34078	-4.80372	1.55748e-06	1.47047e-05	Down
Dimt1	ENSMUSG00000021692	66254	203	199	226	266	255	264	252.714	0.7433	0.112517	6.6061	3.94567e-11	9.22742e-10	Up
3830408C21Rik	ENSMUSG00000071181	100040322	40	19	51	9	9	9	17.4259	-1.57679	0.451757	-3.49036	0.000482372	0.00237004	Down
Ankrd55	ENSMUSG00000049985	77318	10	12	11	27	34	19	24.7171	1.68516	0.546797	3.08187	0.00205707	0.00826974	Up
Dhx29	ENSMUSG00000042426	218629	628	647	623	762	620	855	744.156	0.652582	0.158916	4.10646	4.01775e-05	0.000267141	Up
Ccno	ENSMUSG00000042417	218630	16	8	18	49	50	31	25.7833	2.06596	0.418205	4.94006	7.80971e-07	7.88959e-06	Up
Gzma	ENSMUSG00000023132	14938	26	72	20	6	2	8	19.4421	-2.52708	0.794588	-3.18036	0.00147091	0.00618151	Down
Fst	ENSMUSG00000021765	14313	212	184	364	712	1104	869	609.049	2.26021	0.349145	6.47357	9.5717e-11	2.08062e-09	Up
Itga1	ENSMUSG00000042284	109700	1328	1177	1232	1396	1852	1875	1636.41	0.868609	0.125746	6.90764	4.92788e-12	1.37913e-10	Up
Isl1	ENSMUSG00000042258	16392	103	66	257	57	13	15	63.2014	-1.83012	0.676604	-2.70486	0.00683336	0.0228934	Down
Parp8	ENSMUSG00000021725	52552	189	199	202	82	108	103	190.039	-0.598184	0.222871	-2.68399	0.00727493	0.024154	Down
Emb	ENSMUSG00000021728	13723	274	334	314	587	600	639	558.022	1.39441	0.268141	5.20029	1.98982e-07	2.3121e-06	Up
Fgf10	ENSMUSG00000021732	14165	1521	2159	1895	675	889	745	1158.33	-0.873595	0.240101	-3.63845	0.00027428	0.00143901	Down
Hmgcs1	ENSMUSG00000093930	208715	4593	4930	4793	1881	1168	2365	4791.8	-0.983679	0.267863	-3.67232	0.00024036	0.00128525	Down
Dnase1l3	ENSMUSG00000025279	13421	57	102	54	2	5	7	34.1404	-3.55189	0.631825	-5.62164	1.89156e-08	2.72368e-07	Down
Kctd6	ENSMUSG00000021752	71393	788	575	807	375	398	290	483.028	-0.60177	0.144387	-4.16775	3.07627e-05	0.000210527	Down
Psmd6	ENSMUSG00000021737	66413	1388	1102	1165	1511	1374	1535	1442.67	0.693846	0.119616	5.80063	6.60649e-09	1.03796e-07	Up
Rarb	ENSMUSG00000017491	218772	87	75	130	23	27	37	72.3918	-1.30914	0.328815	-3.9814	6.85107e-05	0.000427379	Down
Nr1d2	ENSMUSG00000021775	353187	3759	3239	4044	1303	901	866	2350.73	-1.41807	0.168261	-8.42776	3.52357e-17	2.1832e-15	Down
Nudt13	ENSMUSG00000021809	67725	1046	846	889	369	415	359	598.854	-0.866818	0.11247	-7.70708	1.28733e-14	5.28066e-13	Down
Cfap70	ENSMUSG00000039543	76670	9	13	13	0	2	0	28.8269	-3.71699	1.1088	-3.35225	0.000801575	0.00367896	Down
Anxa7	ENSMUSG00000021814	11750	3745	3438	4052	5777	4777	5517	4859.07	0.940686	0.112912	8.33116	8.00541e-17	4.70746e-15	Up
Ap3m1	ENSMUSG00000021824	55946	1597	1415	1502	1837	1735	2083	1839.04	0.743762	0.136187	5.46131	4.72627e-08	6.2361e-07	Up
Zfp503	ENSMUSG00000039081	218820	2247	1708	2680	545	857	560	1068.38	-1.33027	0.234922	-5.66261	1.49085e-08	2.19326e-07	Down
Kcnma1	ENSMUSG00000063142	16531	42	37	53	6	11	7	23.1361	-2.03509	0.480934	-4.23154	2.32101e-05	0.000165053	Down
Zmiz1	ENSMUSG00000007817	328365	4378	3876	4092	4539	5056	4668	5450.43	0.622928	0.152844	4.07559	4.58982e-05	0.000300175	Up
Pde12	ENSMUSG00000043702	211948	491	421	433	613	567	630	567.987	0.846802	0.119576	7.08168	1.42417e-12	4.35079e-11	Up
Il17rd	ENSMUSG00000040717	171463	534	389	600	224	297	227	389.76	-0.596207	0.17484	-3.41002	0.000649575	0.00307283	Down
Wnt5a	ENSMUSG00000021994	22418	834	694	793	284	391	258	575.786	-0.90022	0.197082	-4.56774	4.93012e-06	4.10426e-05	Down
Lrtm1	ENSMUSG00000045776	319476	217	46	97	0	3	0	32.6283	-6.47676	1.15856	-5.59036	2.26605e-08	3.20842e-07	Down
Chdh	ENSMUSG00000015970	218865	2545	1861	1756	411	658	196	936.883	-1.88373	0.349605	-5.38817	7.11798e-08	9.10261e-07	Down
Cacna1d	ENSMUSG00000015968	12289	78	90	89	158	432	270	247.192	2.14014	0.369532	5.79148	6.9767e-09	1.08856e-07	Up
Tkt	ENSMUSG00000021957	21881	17893	8487	14941	5041	4285	4342	8094.65	-1.15177	0.338035	-3.40724	0.000656227	0.00310286	Down
Mustn1	ENSMUSG00000042485	66175	896	732	953	2388	1889	2341	1890.4	1.78908	0.365553	4.89417	9.87214e-07	9.74096e-06	Up
Gnl3	ENSMUSG00000042354	30877	722	788	829	1872	1588	1759	1414.38	1.5754	0.131896	11.9443	6.95639e-33	2.21148e-30	Up
Nt5dc2	ENSMUSG00000071547	70021	110	91	143	129	171	161	175.131	0.853256	0.331484	2.57405	0.0100517	0.0317023	Up
Phf7	ENSMUSG00000021902	71838	341	273	439	146	202	151	231.447	-0.647293	0.154652	-4.18547	2.84574e-05	0.000196934	Down
Dnah1	ENSMUSG00000019027	110084	15	21	46	12	1	4	41.417	-1.80565	0.69484	-2.59866	0.00935886	0.0298683	Down
Eaf1	ENSMUSG00000021890	74427	1021	878	1025	1180	1085	1308	1180.86	0.712539	0.133773	5.32649	1.00127e-07	1.23018e-06	Up
Hacl1	ENSMUSG00000021884	56794	871	884	1071	306	402	432	642.507	-0.890143	0.140947	-6.31546	2.69355e-10	5.4422e-09	Down
Ogdhl	ENSMUSG00000021913	239017	14	19	19	20	50	21	65.8116	1.20917	0.437762	2.76217	0.0057418	0.0197837	Up
Lrrc18	ENSMUSG00000041673	67580	23	14	43	10	5	8	23.3335	-1.33808	0.517144	-2.58745	0.00966889	0.0306805	Down
Arhgap22	ENSMUSG00000063506	239027	35	27	31	72	51	60	62.1921	1.40269	0.402144	3.48802	0.000486616	0.00238974	Up
Gdf10	ENSMUSG00000021943	14560	1539	909	1076	106	237	153	642.284	-2.41531	0.303278	-7.964	1.66572e-15	7.84508e-14	Down
Gm5460	ENSMUSG00000072624	432838	496	481	854	120	196	142	294.091	-1.56561	0.284152	-5.50976	3.59315e-08	4.84148e-07	Down
A630023A22Rik	ENSMUSG00000095493	105518	1	0	0	17	3	5	5.89663	4.97534	1.4685	3.38805	0.000703919	0.0032924	Up
Anxa8	ENSMUSG00000021950	11752	651	338	1028	2371	640	1206	1048.69	1.54704	0.431768	3.58303	0.000339633	0.00173579	Up
Txndc16	ENSMUSG00000021830	70561	744	797	976	291	444	452	654.818	-0.666491	0.162572	-4.09967	4.13739e-05	0.000273932	Down
Gnpnat1	ENSMUSG00000037722	54342	529	631	722	1017	787	931	734.412	0.961116	0.160488	5.98871	2.11516e-09	3.64394e-08	Up
Samd4	ENSMUSG00000021838	74480	397	476	406	528	431	613	643.542	0.706591	0.178133	3.96665	7.28899e-05	0.00045214	Up
Gch1	ENSMUSG00000037580	14528	114	165	137	346	230	263	220.176	1.42019	0.257517	5.51494	3.48899e-08	4.71674e-07	Up
Lgals3	ENSMUSG00000050335	16854	3027	2319	2586	4200	3768	6046	7213.35	1.24545	0.426696	2.91883	0.00351349	0.0130282	Up
Tmem260	ENSMUSG00000036339	218989	748	720	984	404	383	425	617.619	-0.588276	0.118792	-4.95214	7.34e-07	7.47445e-06	Down
Armh4	ENSMUSG00000036242	67419	157	109	175	20	39	31	86.6128	-1.86339	0.352261	-5.2898	1.22449e-07	1.47767e-06	Down
Tlr11	ENSMUSG00000051969	239081	25	36	22	1	13	3	17.5687	-1.92119	0.737063	-2.60655	0.00914598	0.0293017	Down
Klhl33	ENSMUSG00000090799	546611	33	14	19	9	4	2	17.4306	-1.70295	0.644766	-2.64119	0.00826155	0.0268599	Down
Apex1	ENSMUSG00000035960	11792	334	217	308	522	370	473	390.611	1.10381	0.18736	5.89136	3.8302e-09	6.28461e-08	Up
Pnp2	ENSMUSG00000068417	667034	79	107	93	118	149	110	110.495	0.834894	0.342263	2.43933	0.0147144	0.0435969	Up
Rnase4	ENSMUSG00000021876	58809	4764	4283	6158	1868	2257	1981	3594.52	-0.88845	0.211088	-4.20892	2.56595e-05	0.00018021	Down
Ang	ENSMUSG00000072115	11727	220	215	265	95	101	117	180.114	-0.738283	0.21247	-3.47476	0.000511307	0.00249294	Down
Rnase6	ENSMUSG00000021880	78416	86	107	72	16	26	32	66.7087	-1.44716	0.378177	-3.82669	0.00012988	0.000750721	Down
Rnase2a	ENSMUSG00000047222	93726	16	49	13	41	88	65	47.1405	1.6562	0.524798	3.15588	0.00160016	0.00665229	Up
Dad1	ENSMUSG00000022174	13135	2100	1696	1965	2154	2171	2283	2290.6	0.619655	0.0941422	6.58211	4.63806e-11	1.06508e-09	Up
Slc7a7	ENSMUSG00000000958	20540	120	160	142	157	229	247	225.615	0.989697	0.213122	4.6438	3.4206e-06	2.96278e-05	Up
Mrpl52	ENSMUSG00000010406	68836	661	562	739	840	733	812	780.94	0.71011	0.132615	5.35467	8.57123e-08	1.0706e-06	Up
Haus4	ENSMUSG00000022177	219072	220	162	241	80	68	84	149.645	-0.993314	0.173217	-5.73449	9.7807e-09	1.48951e-07	Down
Ajuba	ENSMUSG00000022178	16475	705	616	785	343	404	294	584.822	-0.594762	0.117438	-5.06449	4.09497e-07	4.42936e-06	Down
Slc7a8	ENSMUSG00000022180	50934	1000	1464	1039	1040	4776	1320	1767.77	1.39014	0.478455	2.90548	0.00366689	0.0134766	Up
Efs	ENSMUSG00000022203	13644	307	226	479	147	115	87	228.913	-1.0857	0.261928	-4.14505	3.39741e-05	0.000229114	Down
Zfhx2	ENSMUSG00000040721	239102	184	164	183	179	334	184	203.14	0.80101	0.2462	3.25349	0.00113997	0.00498149	Up
Carmil3	ENSMUSG00000022211	268747	41	30	57	15	17	12	27.2971	-1.10431	0.3701	-2.98383	0.00284669	0.0109198	Down
Emc9	ENSMUSG00000022217	85308	988	888	896	274	381	370	587.557	-1.02399	0.155249	-6.5958	4.22959e-11	9.82367e-10	Down
Rec8	ENSMUSG00000002324	56739	6	4	13	0	3	1	63.5545	-2.08536	0.861726	-2.41998	0.0155213	0.0455432	Down
Ipo4	ENSMUSG00000002319	75751	1647	1619	1879	2562	2125	2795	2372.4	0.963872	0.131719	7.31766	2.52334e-13	8.57094e-12	Up
Tgm1	ENSMUSG00000022218	21816	35	39	68	866	568	602	321.987	4.28317	0.304816	14.0516	7.52661e-45	6.12546e-42	Up
Rabggta	ENSMUSG00000040472	56187	378	270	342	418	353	353	363.034	0.610728	0.162946	3.74803	0.000178227	0.000990227	Up
Nop9	ENSMUSG00000019297	67842	416	414	488	600	514	634	527.262	0.830975	0.131819	6.3039	2.90245e-10	5.78952e-09	Up
Ltb4r1	ENSMUSG00000046908	16995	61	56	79	159	98	197	132.948	1.64943	0.437291	3.77194	0.000161984	0.000911179	Up
Adcy4	ENSMUSG00000022220	104110	1400	1926	1921	2180	1975	2196	2043.84	0.68666	0.204268	3.36157	0.00077501	0.00357397	Up
Ripk3	ENSMUSG00000022221	56532	247	253	227	403	428	444	381.208	1.22002	0.183479	6.64936	2.94366e-11	7.02482e-10	Up
Cma1	ENSMUSG00000022225	17228	316	322	292	130	60	75	185.743	-1.39342	0.39703	-3.50961	0.000448762	0.00222316	Down
Mcpt4	ENSMUSG00000061068	17227	252	287	308	81	81	64	179.457	-1.49228	0.348303	-4.28443	1.83207e-05	0.000133556	Down
Gzmb	ENSMUSG00000015437	14939	22	48	12	3	5	8	14.1774	-2.0065	0.722783	-2.77608	0.00550193	0.0190897	Down
2410022M11Rik	ENSMUSG00000100017	100503842	159	106	169	70	60	48	95.9526	-0.851343	0.236956	-3.59283	0.000327103	0.00167892	Down
Cryl1	ENSMUSG00000021947	68631	458	358	506	187	199	219	304.992	-0.698444	0.146478	-4.76824	1.8584e-06	1.72467e-05	Down
Eef1akmt1	ENSMUSG00000021951	68043	233	181	185	235	218	244	235.526	0.637572	0.181154	3.5195	0.000432354	0.00214763	Up
Fgf9	ENSMUSG00000021974	14180	53	80	148	40	35	27	66.498	-1.02018	0.422492	-2.41467	0.0157497	0.0461202	Down
Phf11a	ENSMUSG00000044703	219131	28	59	24	3	5	17	25.6654	-1.7807	0.685249	-2.59861	0.00936009	0.0298683	Down
Cab39l	ENSMUSG00000021981	69008	1761	1589	1969	1511	4457	1802	2065.86	0.950454	0.303163	3.13512	0.00171782	0.00706934	Up
Shisa2	ENSMUSG00000044461	219134	204	165	262	24	55	27	115.358	-2.15079	0.465675	-4.61864	3.86268e-06	3.29933e-05	Down
Amer2	ENSMUSG00000021986	72125	0	0	2	9	8	4	4.90227	3.84458	1.33774	2.87393	0.00405395	0.0147052	Up
C1qtnf9	ENSMUSG00000071347	239126	1922	947	1613	400	458	528	966.361	-1.25336	0.227907	-5.49942	3.81047e-08	5.11397e-07	Down
Tnfrsf19	ENSMUSG00000060548	29820	13	23	34	0	5	4	9.66976	-2.53964	0.750799	-3.38258	0.000718076	0.00335014	Down
Fam124a	ENSMUSG00000035184	629059	567	466	560	448	994	750	582.063	0.872777	0.228944	3.81219	0.00013774	0.000789204	Up
Neil2	ENSMUSG00000035121	382913	220	239	337	77	91	93	148.334	-1.18189	0.201839	-5.85562	4.75246e-09	7.68019e-08	Down
Blk	ENSMUSG00000014453	12143	23	66	48	18	2	9	22.8686	-1.83558	0.667476	-2.75003	0.00595892	0.0204245	Down
Pinx1	ENSMUSG00000021958	72400	156	140	167	291	270	327	247.647	1.36352	0.148964	9.15338	5.518e-20	4.79783e-18	Up
Sox7	ENSMUSG00000063060	20680	1998	1876	2035	438	445	457	1021.71	-1.72364	0.245413	-7.02345	2.16459e-12	6.42932e-11	Down
Prss51	ENSMUSG00000052099	100504162	13	99	45	5	6	6	21.6342	-2.85884	0.981496	-2.91274	0.00358272	0.013227	Down
Kif13b	ENSMUSG00000060012	16554	974	962	1154	413	576	524	803.792	-0.612564	0.131375	-4.66272	3.12052e-06	2.72607e-05	Down
Fbxo16	ENSMUSG00000034532	50759	12	5	13	0	4	0	8.51959	-2.47344	0.959295	-2.5784	0.00992603	0.0313692	Down
Zfp395	ENSMUSG00000034522	380912	1584	1679	2561	520	288	325	948.795	-1.92127	0.236283	-8.13122	4.25002e-16	2.25772e-14	Down
Ccdc25	ENSMUSG00000022035	67179	665	601	702	943	985	933	843.247	0.960619	0.0844456	11.3756	5.5324e-30	1.40703e-27	Up
Stmn4	ENSMUSG00000022044	56471	15	11	24	2	1	1	7.85482	-3.19825	0.898823	-3.55827	0.000373306	0.00188749	Down
Dpysl2	ENSMUSG00000022048	12934	565	541	731	211	262	225	453.876	-0.971875	0.139043	-6.98976	2.75366e-12	8.02664e-11	Down
Ebf2	ENSMUSG00000022053	13592	1274	1043	1193	435	429	383	686.415	-1.07262	0.121796	-8.80667	1.28922e-18	9.368e-17	Down
Nefm	ENSMUSG00000022054	18040	1	2	2	4	3	10	5.12303	2.19004	0.921049	2.37777	0.0174177	0.0499621	Up
Stc1	ENSMUSG00000014813	20855	168	208	222	146	639	235	275.011	1.16001	0.429508	2.70078	0.0069177	0.0231335	Up
Slc25a37	ENSMUSG00000034248	67712	983	1198	1386	1722	1158	1778	1548.45	0.809743	0.213333	3.79568	0.000147241	0.00083915	Up
Loxl2	ENSMUSG00000034205	94352	1382	879	1456	410	582	593	1017.65	-0.794863	0.176604	-4.50083	6.76896e-06	5.4869e-05	Down
Tnfrsf10b	ENSMUSG00000022074	21933	250	342	333	547	528	552	461.544	1.22572	0.169536	7.22985	4.83538e-13	1.58423e-11	Up
Pdlim2	ENSMUSG00000022090	213019	330	318	431	166	172	153	277.484	-0.710374	0.125759	-5.64869	1.61677e-08	2.35468e-07	Down
Slc39a14	ENSMUSG00000022094	213053	759	638	695	6700	11752	6355	4074.01	3.97499	0.222144	17.8937	1.31952e-71	3.35588e-68	Up
Piwil2	ENSMUSG00000033644	57746	47	21	77	153	92	106	95.9675	1.74588	0.388239	4.49693	6.89402e-06	5.57717e-05	Up
Polr3d	ENSMUSG00000000776	67065	346	323	401	700	549	694	572.534	1.2879	0.14341	8.9805	2.69546e-19	2.12565e-17	Up
Phyhip	ENSMUSG00000003469	105653	38	24	112	23	6	13	32.3691	-1.55546	0.585237	-2.65783	0.00786457	0.0257711	Down
Bmp1	ENSMUSG00000022098	12153	1609	1234	1606	3567	2683	4569	3347.89	1.71507	0.182081	9.41927	4.54226e-21	4.57509e-19	Up
Reep4	ENSMUSG00000033589	72549	384	443	313	624	460	702	618.272	1.05016	0.234643	4.47555	7.62157e-06	6.08589e-05	Up
Hr	ENSMUSG00000022096	15460	563	1109	560	1826	696	2392	2240.62	1.52431	0.431034	3.53639	0.000405633	0.00203226	Up
Dmtn	ENSMUSG00000022099	13829	883	575	653	274	380	302	636.404	-0.725241	0.200182	-3.62291	0.000291305	0.00151622	Down
Rcbtb2	ENSMUSG00000022106	105670	1893	1901	2132	675	705	646	1257.27	-1.13107	0.103994	-10.8764	1.49407e-27	2.84097e-25	Down
Lpar6	ENSMUSG00000033446	67168	1282	1276	1448	525	562	567	1013.85	-0.857837	0.106397	-8.06263	7.46674e-16	3.76968e-14	Down
Htr2a	ENSMUSG00000034997	15558	4	9	8	23	20	20	15.2384	2.00223	0.464826	4.30748	1.65128e-05	0.000121508	Up
Esd	ENSMUSG00000021996	13885	2218	1985	2387	3168	2551	3176	2693.97	0.858731	0.131532	6.52866	6.63589e-11	1.48694e-09	Up
Rubcnl	ENSMUSG00000034959	271221	32	74	59	6	20	16	37.4232	-1.58778	0.498887	-3.18265	0.00145932	0.00613713	Down
Slc25a30	ENSMUSG00000022003	67554	298	301	338	599	1015	622	527.393	1.66354	0.249509	6.66723	2.60677e-11	6.30647e-10	Up
Gtf2f2	ENSMUSG00000067995	68705	355	281	328	392	377	353	383.003	0.641199	0.125956	5.09066	3.56827e-07	3.91164e-06	Up
Kctd4	ENSMUSG00000046523	67516	0	1	0	3	9	7	4.63253	4.55196	1.45611	3.12611	0.00177133	0.00726163	Up
Nufip1	ENSMUSG00000022009	27275	273	250	290	385	364	336	342.088	0.838048	0.107956	7.76286	8.30366e-15	3.53444e-13	Up
Lacc1	ENSMUSG00000044350	210808	410	422	502	162	236	170	383.518	-0.817034	0.235978	-3.46234	0.000535508	0.00259474	Down
Epsti1	ENSMUSG00000022014	108670	247	351	225	48	59	150	198.734	-1.28641	0.422474	-3.04494	0.00232725	0.00918947	Down
Dgkh	ENSMUSG00000034731	380921	66	65	68	63	112	90	80.5374	0.824607	0.252535	3.26531	0.00109343	0.00481119	Up
Rgcc	ENSMUSG00000022018	66214	9281	6908	6643	13173	7440	11750	9333.71	0.926543	0.242262	3.82455	0.00013101	0.000755961	Up
Olfm4	ENSMUSG00000022026	380924	0	0	1	3	6	8	4.59615	4.39837	1.45417	3.02466	0.0024891	0.00974845	Up
Diaph3	ENSMUSG00000022021	56419	39	28	74	14	16	9	43.0083	-1.40156	0.511372	-2.74078	0.00612928	0.0209115	Down
Dach1	ENSMUSG00000055639	13134	240	170	307	81	109	106	186.536	-0.838763	0.24009	-3.49353	0.00047668	0.00234547	Down
Dis3	ENSMUSG00000033166	72662	384	346	386	711	545	625	530.478	1.17627	0.131118	8.9711	2.93564e-19	2.28845e-17	Up
Uchl3	ENSMUSG00000022111	50933	258	239	266	349	297	323	314.665	0.766381	0.13716	5.5875	2.30356e-08	3.25473e-07	Up
Kctd12	ENSMUSG00000098557	239217	1364	1438	1409	630	705	707	1203.82	-0.633896	0.158073	-4.01014	6.06832e-05	0.00038415	Down
Acod1	ENSMUSG00000022126	16365	2	3	4	55	40	162	54.5273	5.27035	0.734848	7.17203	7.38919e-13	2.3454e-11	Up
Cln5	ENSMUSG00000022125	211286	966	837	1006	1041	1195	1097	1061.38	0.667481	0.0934456	7.14298	9.13274e-13	2.85869e-11	Up
Mycbp2	ENSMUSG00000033004	105689	4871	5399	5324	5931	6069	6184	6204.71	0.632486	0.137786	4.59034	4.42535e-06	3.72856e-05	Up
Scel	ENSMUSG00000022123	64929	63	47	80	61	84	100	74.6946	0.801464	0.335078	2.39187	0.0167626	0.0485552	Up
Ednrb	ENSMUSG00000022122	13618	2488	3318	3038	3014	4419	3897	3647.01	0.757258	0.260422	2.90781	0.00363969	0.0133868	Up
Spry2	ENSMUSG00000022114	24064	494	474	606	762	662	689	633.897	0.851205	0.146	5.83018	5.53664e-09	8.83518e-08	Up
Tpm3-rs7	ENSMUSG00000058126	621054	53	90	75	110	89	117	97.6385	0.942642	0.280274	3.36328	0.000770217	0.00355348	Up
Gpc6	ENSMUSG00000058571	23888	317	289	339	55	215	117	292.353	-0.885109	0.361443	-2.44882	0.0143325	0.0427077	Down
Dct	ENSMUSG00000022129	13190	63	35	38	8	13	7	20.4019	-1.86383	0.522577	-3.56661	0.000361635	0.00183578	Down
Dzip1	ENSMUSG00000042156	66573	214	177	360	87	99	86	167.167	-1.02098	0.260099	-3.92537	8.65958e-05	0.000524691	Down
Gpr18	ENSMUSG00000050350	110168	8	16	12	2	1	1	7.15593	-2.76828	0.916046	-3.02199	0.00251117	0.00981976	Down
C7	ENSMUSG00000079105	109828	3320	2889	3201	583	1789	635	1852.47	-1.24861	0.413979	-3.01611	0.00256041	0.00999313	Down
Prkaa1	ENSMUSG00000050697	105787	2807	2452	3432	1216	1244	1300	1812.91	-0.779609	0.0832381	-9.36601	7.53263e-21	7.33296e-19	Down
Dab2	ENSMUSG00000022150	13132	3710	4225	4282	8938	5613	10659	6657.1	1.46537	0.252858	5.79522	6.82307e-09	1.06622e-07	Up
Osmr	ENSMUSG00000022146	18414	2326	1690	2074	6973	5620	6931	4545.39	2.10929	0.158704	13.2907	2.62007e-40	1.71961e-37	Up
Egflam	ENSMUSG00000042961	268780	459	299	393	79	153	85	242.974	-1.44244	0.269855	-5.34526	9.02854e-08	1.11941e-06	Down
Ranbp3l	ENSMUSG00000048424	223332	48	87	51	7	3	13	38.856	-2.62463	0.491122	-5.34416	9.08381e-08	1.12489e-06	Down
Nadk2	ENSMUSG00000022253	68646	747	674	950	359	358	315	514.804	-0.771849	0.112268	-6.87503	6.19757e-12	1.69256e-10	Down
Capsl	ENSMUSG00000039676	75568	2	13	14	1	2	2	21.3364	-2.12553	0.852488	-2.49332	0.0126554	0.0384597	Down
Prlr	ENSMUSG00000005268	19116	1859	782	1577	329	406	303	639.426	-1.57958	0.322617	-4.89615	9.77316e-07	9.65734e-06	Down
Agxt2	ENSMUSG00000089678	268782	36	4	27	1	0	0	10.3288	-5.49037	1.4239	-3.85586	0.000115325	0.000676779	Down
Brix1	ENSMUSG00000022247	67832	696	610	756	995	811	933	870.146	0.836163	0.106964	7.8172	5.40092e-15	2.34802e-13	Up
Rai14	ENSMUSG00000022246	75646	668	635	650	877	1115	1106	1004.77	1.07879	0.113693	9.4886	2.34147e-21	2.48122e-19	Up
Adamts12	ENSMUSG00000047497	239337	1109	999	1161	356	766	477	739.406	-0.622942	0.215837	-2.88617	0.00389963	0.0142241	Down
Tars	ENSMUSG00000022241	110960	1206	1094	1270	1583	1492	1574	1486.06	0.802775	0.0972657	8.25342	1.53929e-16	8.72376e-15	Up
1700047G03Rik	ENSMUSG00000099349	73339	146	338	66	229	1167	1025	925.345	2.45852	0.686928	3.579	0.000344905	0.0017592	Up
Golph3	ENSMUSG00000022200	66629	2040	1880	2145	2694	3175	2920	2661.92	0.953221	0.0615996	15.4745	5.15932e-54	8.07473e-51	Up
Ankrd33b	ENSMUSG00000022237	67434	101	169	137	227	236	258	211.949	1.22721	0.214358	5.72503	1.03415e-08	1.56554e-07	Up
Cmbl	ENSMUSG00000022235	69574	3209	2972	3596	983	1811	1290	2170.55	-0.846472	0.174147	-4.86069	1.1698e-06	1.13278e-05	Down
Sema5a	ENSMUSG00000022231	20356	1744	1483	2893	3982	1844	3104	2423.15	1.0026	0.308391	3.25108	0.00114967	0.00501741	Up
Sdc2	ENSMUSG00000022261	15529	1735	1429	1955	718	1031	796	1320.18	-0.585094	0.118392	-4.94203	7.73133e-07	7.83375e-06	Down
Tspyl5	ENSMUSG00000038984	239364	49	41	66	17	15	8	37.253	-1.53206	0.348383	-4.39763	1.09441e-05	8.42172e-05	Down
Pop1	ENSMUSG00000022325	67724	198	134	157	287	255	290	255.222	1.19174	0.166315	7.16556	7.74704e-13	2.44374e-11	Up
Nipal2	ENSMUSG00000038879	223473	18	27	14	3	8	3	21.132	-1.68976	0.572274	-2.95272	0.00314986	0.0118988	Down
Spag1	ENSMUSG00000037617	26942	88	71	78	79	84	103	90.9914	0.587715	0.190238	3.08936	0.00200587	0.00809429	Up
Ywhaz	ENSMUSG00000022285	22631	5201	4490	5598	5927	5371	5807	5886.8	0.587755	0.0906346	6.48488	8.88007e-11	1.94902e-09	Up
Gm10384	ENSMUSG00000072618	100038735	89	42	112	13	8	6	34.6407	-2.71211	0.477584	-5.67881	1.35639e-08	2.00998e-07	Down
Ncald	ENSMUSG00000051359	52589	124	115	172	24	31	32	106.796	-1.8117	0.22285	-8.12968	4.30428e-16	2.28059e-14	Down
Klf10	ENSMUSG00000037465	21847	1513	1748	1707	2465	1773	1912	2104.83	0.722448	0.213304	3.38695	0.000706753	0.0033049	Up
Azin1	ENSMUSG00000037458	54375	1922	1740	1797	2567	1909	2585	2319.53	0.791597	0.17623	4.49184	7.06108e-06	5.68744e-05	Up
Lrp12	ENSMUSG00000022305	239393	738	506	742	256	273	309	453.382	-0.812181	0.21718	-3.73966	0.000184268	0.00102072	Down
Zfpm2	ENSMUSG00000022306	22762	317	225	334	82	121	78	192.139	-1.2139	0.22445	-5.40834	6.36109e-08	8.1965e-07	Down
Angpt1	ENSMUSG00000022309	11600	1002	723	869	492	291	265	406.047	-0.877383	0.28081	-3.12447	0.00178127	0.0072921	Down
Nudcd1	ENSMUSG00000038736	67429	233	240	232	415	404	551	394.394	1.37344	0.180057	7.62783	2.38735e-14	9.39515e-13	Up
Rad21	ENSMUSG00000022314	19357	5014	4575	6796	2712	2823	2471	3487.09	-0.602241	0.0966855	-6.22887	4.69815e-10	9.01779e-09	Down
Ext1	ENSMUSG00000061731	14042	1982	1742	1800	2505	2186	2934	2393.48	0.883976	0.158278	5.58496	2.33749e-08	3.2981e-07	Up
Mal2	ENSMUSG00000024479	105853	39	33	59	169	76	177	128.174	2.13732	0.380523	5.6168	1.94524e-08	2.79505e-07	Up
Deptor	ENSMUSG00000022419	97998	2570	2893	2500	5437	7500	7651	5638.82	1.77162	0.182642	9.69995	3.01641e-22	3.48704e-20	Up
Has2os	ENSMUSG00000086541	594843	42	33	59	6	17	10	27.8637	-1.59165	0.426565	-3.73131	0.00019049	0.00105118	Down
Tbc1d31	ENSMUSG00000022364	210544	545	544	780	181	191	180	338.595	-1.33105	0.139323	-9.55372	1.25117e-21	1.39105e-19	Down
Fam83a	ENSMUSG00000051225	239463	352	223	135	370	282	892	464.13	1.53183	0.477117	3.21059	0.00132463	0.00565364	Up
Fbxo32	ENSMUSG00000022358	67731	562	619	849	284	331	250	456.064	-0.806682	0.172745	-4.66978	3.01518e-06	2.6454e-05	Down
Mtss1	ENSMUSG00000022353	211401	2051	1414	2171	826	828	818	1354.66	-0.754422	0.13674	-5.51721	3.44431e-08	4.66565e-07	Down
Sqle	ENSMUSG00000022351	20775	304	233	251	370	270	303	392.892	0.682319	0.248808	2.74236	0.00610003	0.020817	Up
Trib1	ENSMUSG00000032501	211770	643	394	366	2115	1292	2096	1379.2	2.39566	0.269294	8.89608	5.78553e-19	4.39225e-17	Up
Myc	ENSMUSG00000022346	17869	633	469	498	1495	1022	1500	1072.95	1.7531	0.210271	8.33736	7.59664e-17	4.48004e-15	Up
Pvt1	ENSMUSG00000097039	19296	78	56	74	107	117	91	100.561	1.02284	0.206841	4.94505	7.61228e-07	7.73237e-06	Up
Adcy8	ENSMUSG00000022376	11514	10	7	18	2	1	0	83.6118	-3.10097	0.950738	-3.26164	0.00110769	0.00486238	Down
Tmem71	ENSMUSG00000036944	213068	197	232	206	53	71	58	141.09	-1.39639	0.193245	-7.22599	4.97469e-13	1.62725e-11	Down
Tg	ENSMUSG00000053469	21819	3	6	2	52	70	15	20.7603	4.01333	0.801395	5.00793	5.50188e-07	5.7664e-06	Up
St3gal1	ENSMUSG00000013846	20442	2804	2204	3783	4314	2523	3027	3043.5	0.61355	0.221194	2.77381	0.00554039	0.0192035	Up
Khdrbs3	ENSMUSG00000022332	13992	120	132	158	209	192	250	218.198	1.09045	0.201132	5.42156	5.90827e-08	7.66155e-07	Up
Arc	ENSMUSG00000022602	11838	52	66	34	204	158	173	148.818	2.21034	0.309738	7.13617	9.59676e-13	2.99932e-11	Up
Jrk	ENSMUSG00000046380	16469	85	46	72	101	110	99	92.7068	1.04115	0.230766	4.51173	6.43006e-06	5.23094e-05	Up
Ly6d	ENSMUSG00000034634	17068	15	52	21	1	0	4	13.0945	-3.77229	0.89419	-4.21867	2.45751e-05	0.000173794	Down
Ly6m	ENSMUSG00000063522	67038	6	7	4	0	1	0	3.00523	-3.58495	1.40947	-2.54348	0.0109755	0.0340928	Down
Ly6a	ENSMUSG00000075602	110454	4213	6672	5102	7026	7086	7421	6301.36	0.823873	0.224385	3.67169	0.000240954	0.00128782	Up
Ly6c1	ENSMUSG00000079018	17067	6218	5111	6982	6656	9158	7142	6820.53	0.749528	0.180175	4.15999	3.18256e-05	0.000216563	Up
Ly6c2	ENSMUSG00000022584	100041546	77	195	73	473	123	451	254.998	1.9746	0.588706	3.35413	0.000796154	0.00365656	Up
Ly6g	ENSMUSG00000022582	546644	1	1	4	3	9	13	6.46983	2.50231	0.954096	2.6227	0.00872354	0.0281371	Up
Ly6h	ENSMUSG00000022577	23934	113	77	56	15	23	18	55.4359	-1.7307	0.35582	-4.86399	1.15045e-06	1.11622e-05	Down
Zfp41	ENSMUSG00000047003	22701	125	105	129	35	74	46	89.9678	-0.795302	0.229465	-3.46589	0.00052847	0.00256494	Down
Naprt	ENSMUSG00000022574	223646	410	290	396	198	186	153	244.114	-0.601438	0.139497	-4.31148	1.62169e-05	0.00011959	Down
Plec	ENSMUSG00000022565	18810	3986	3501	4703	5821	5367	6035	5381.34	0.927905	0.124813	7.43435	1.05087e-13	3.80445e-12	Up
Oplah	ENSMUSG00000022562	75475	2396	1526	2662	1133	1063	677	1284.69	-0.756809	0.261054	-2.89905	0.00374301	0.0137135	Down
Hgh1	ENSMUSG00000022554	59053	127	117	150	231	199	217	181.4	1.14178	0.165631	6.89355	5.44158e-12	1.51043e-10	Up
Bop1	ENSMUSG00000022557	12181	711	602	688	1283	1061	1244	1032.36	1.26612	0.148097	8.54927	1.2387e-17	8.29035e-16	Up
Dgat1	ENSMUSG00000022555	13350	9243	6020	11191	2437	1325	2542	4291.44	-1.61518	0.285426	-5.65882	1.52416e-08	2.2358e-07	Down
Slc52a2	ENSMUSG00000022560	52710	330	247	349	420	405	443	376.274	0.882986	0.125515	7.03489	1.99423e-12	5.94935e-11	Up
Kifc2	ENSMUSG00000004187	16581	279	182	285	56	89	65	142.671	-1.39965	0.211174	-6.62794	3.40405e-11	8.0141e-10	Down
Gpt	ENSMUSG00000022546	76282	3319	1835	1650	395	1069	445	1450.76	-1.4361	0.42265	-3.39784	0.00067921	0.00319667	Down
Recql4	ENSMUSG00000033762	79456	32	19	24	2	12	4	19.7173	-1.64584	0.582544	-2.82526	0.00472417	0.016754	Down
Apol7c	ENSMUSG00000044309	108956	8	24	6	0	0	1	7.62314	-4.79803	1.46393	-3.27751	0.00104728	0.00463017	Down
Apol10b	ENSMUSG00000050014	328561	328	468	192	51	86	98	172.384	-1.70467	0.376016	-4.53351	5.80116e-06	4.75354e-05	Down
Apol9b	ENSMUSG00000068246	71898	112	232	153	83	31	57	91.7792	-1.14267	0.428217	-2.66843	0.0076206	0.0251132	Down
Foxred2	ENSMUSG00000016552	239554	205	173	152	28	68	42	150.174	-1.54115	0.306114	-5.03456	4.78957e-07	5.08074e-06	Down
Eif3d	ENSMUSG00000016554	55944	1135	962	1204	1380	1189	1338	1283.25	0.669616	0.0882947	7.58388	3.35382e-14	1.29728e-12	Up
Csf2rb2	ENSMUSG00000071714	12984	921	701	733	2372	1733	2039	1612.64	1.8058	0.290149	6.22369	4.8561e-10	9.29466e-09	Up
Csf2rb	ENSMUSG00000071713	12983	2184	1685	2078	6266	4974	4945	3698.07	1.87185	0.156349	11.9723	4.96439e-33	1.60326e-30	Up
Tst	ENSMUSG00000044986	22117	1466	801	1348	326	251	147	522.3	-1.87903	0.331987	-5.65995	1.51413e-08	2.22269e-07	Down
Mpst	ENSMUSG00000071711	246221	952	722	1152	436	416	313	561.587	-0.843475	0.165329	-5.10181	3.3642e-07	3.70992e-06	Down
Il2rb	ENSMUSG00000068227	16185	149	193	103	25	15	30	77.7433	-2.27785	0.348463	-6.53685	6.28272e-11	1.41011e-09	Down
Mfng	ENSMUSG00000018169	17305	3318	2793	5864	1190	967	1441	2571.28	-1.28013	0.240247	-5.3284	9.90817e-08	1.21955e-06	Down
Lgals2	ENSMUSG00000043501	107753	156	82	182	78	14	26	75.1059	-1.36208	0.513113	-2.65454	0.00794168	0.0259903	Down
Nol12	ENSMUSG00000033099	97961	479	370	483	690	559	630	594.89	0.925538	0.128537	7.20056	5.99667e-13	1.92746e-11	Up
H1f0	ENSMUSG00000096210	14958	3424	2604	2978	1087	1654	910	2036.96	-0.890231	0.189462	-4.69874	2.61768e-06	2.33922e-05	Down
Polr2f	ENSMUSG00000033020	69833	664	521	624	767	641	638	680.595	0.602714	0.139572	4.3183	1.57234e-05	0.0001165	Up
Pick1	ENSMUSG00000068206	18693	479	413	615	259	252	195	370.595	-0.663373	0.149706	-4.43117	9.37229e-06	7.31729e-05	Down
Baiap2l2	ENSMUSG00000018126	207495	36	26	36	3	2	1	25.2516	-3.60138	0.715973	-5.03006	4.90339e-07	5.19335e-06	Down
Maff	ENSMUSG00000042622	17133	311	344	379	1228	1203	1237	947.276	2.24445	0.171078	13.1194	2.54833e-39	1.44023e-36	Up
Kdelr3	ENSMUSG00000010830	105785	246	138	214	210	232	268	267.007	0.682342	0.248618	2.74454	0.00605962	0.0206965	Up
Cbx6	ENSMUSG00000089715	494448	1516	1151	1715	459	889	511	1031.97	-0.815458	0.22995	-3.54625	0.000390759	0.00196548	Down
Cbx7	ENSMUSG00000053411	52609	1767	1601	2605	619	768	468	1062.19	-1.25573	0.221701	-5.6641	1.47801e-08	2.17595e-07	Down
Syngr1	ENSMUSG00000022415	20972	77	57	140	25	16	16	72.3005	-1.80461	0.578061	-3.12183	0.00179731	0.00735038	Down
Atf4	ENSMUSG00000042406	11911	2837	2626	2923	3082	3392	3001	3218.84	0.59286	0.106479	5.56784	2.57919e-08	3.60166e-07	Up
Cacna1i	ENSMUSG00000022416	239556	6	40	7	0	2	4	6.54201	-2.82858	1.09028	-2.59435	0.00947709	0.0301801	Down
Grap2	ENSMUSG00000042351	17444	45	66	32	9	13	18	32.5269	-1.4581	0.520699	-2.80027	0.00510592	0.0179112	Down
Sgsm3	ENSMUSG00000042303	105835	65	29	57	55	76	57	61.9176	0.74991	0.275495	2.72204	0.00648801	0.0219241	Up
Mchr1	ENSMUSG00000050164	207911	0	1	2	2	18	1	7.19227	3.20659	1.33428	2.40324	0.0162507	0.0472879	Up
Chadl	ENSMUSG00000063765	214685	67	38	63	23	19	19	33.647	-1.02689	0.31903	-3.2188	0.0012873	0.00551861	Down
Rangap1	ENSMUSG00000022391	19387	903	788	759	1420	1086	1531	1202.09	1.13835	0.188164	6.04981	1.45016e-09	2.57911e-08	Up
Gm17597	ENSMUSG00000097613	100504312	30	29	41	5	10	6	14.6169	-1.82846	0.487284	-3.75235	0.000175188	0.000977345	Down
Tef	ENSMUSG00000022389	21685	7556	5042	8047	2621	2081	1951	4430.65	-1.19417	0.168038	-7.10658	1.18955e-12	3.67621e-11	Down
Polr3h	ENSMUSG00000022476	78929	339	281	350	552	439	462	440.155	1.00993	0.149677	6.74742	1.505e-11	3.80855e-10	Up
Csdc2	ENSMUSG00000042109	105859	89	43	107	8	10	4	44.0885	-2.99299	0.46442	-6.44458	1.15923e-10	2.4827e-09	Down
Snu13	ENSMUSG00000063480	20826	1327	1292	1582	1714	1475	1738	1594.85	0.655121	0.12167	5.38439	7.26908e-08	9.26671e-07	Up
LOC100862468	ENSMUSG00000063480	100862468	1327	1292	1582	1714	1475	1738	1594.85	0.655121	0.12167	5.38439	7.26908e-08	9.26671e-07	Up
Ccdc134	ENSMUSG00000068114	76457	244	222	259	281	268	374	292.362	0.771749	0.166713	4.6292	3.67077e-06	3.15262e-05	Up
Tnfrsf13c	ENSMUSG00000068105	72049	14	31	13	2	1	6	8.46863	-2.31033	0.751825	-3.07296	0.00211944	0.00846694	Down
Cenpm	ENSMUSG00000068101	66570	16	13	12	21	25	24	25.9353	1.18921	0.375939	3.16331	0.00155985	0.00651143	Up
Rrp7a	ENSMUSG00000018040	74778	1017	947	1143	1310	1224	1389	1242.35	0.760134	0.10182	7.46544	8.30193e-14	3.04893e-12	Up
A4galt	ENSMUSG00000047878	239559	380	355	497	608	683	760	615.066	1.1636	0.189678	6.13457	8.53876e-10	1.56937e-08	Up
Arfgap3	ENSMUSG00000054277	66251	745	708	807	986	1154	1257	1032.58	1.00627	0.169988	5.91962	3.22683e-09	5.39467e-08	Up
Sult4a1	ENSMUSG00000018865	29859	1	5	4	9	18	6	9.58144	2.11946	0.751364	2.82081	0.0047902	0.0169527	Up
Pnpla3	ENSMUSG00000041653	116939	14018	5761	4892	548	1339	575	3517.28	-2.92337	0.686404	-4.25896	2.05384e-05	0.000147815	Down
Mir6392	ENSMUSG00000098882	102466642	56	14	14	2	3	8	12.3675	-2.26148	0.78836	-2.86859	0.00412301	0.0149128	Down
Shisal1	ENSMUSG00000062760	72301	14	10	7	0	0	0	5.14333	-5.40237	1.30994	-4.12414	3.72115e-05	0.000248803	Down
Ppara	ENSMUSG00000022383	19013	184	87	166	46	85	49	97.4444	-0.845751	0.330407	-2.55973	0.0104754	0.0327607	Down
Celsr1	ENSMUSG00000016028	12614	52	51	76	25	12	16	124.582	-1.32124	0.348177	-3.79474	0.0001478	0.000842098	Down
Creld2	ENSMUSG00000023272	76737	465	472	568	692	707	1031	747.29	1.11482	0.177693	6.27389	3.52145e-10	6.95607e-09	Up
Pim3	ENSMUSG00000035828	223775	6564	6480	7573	8912	6626	7602	7166.4	0.591016	0.166942	3.54024	0.000399757	0.00200529	Up
1810021B22Rik	ENSMUSG00000087331	69120	62	45	94	27	27	20	39.672	-1.00006	0.312967	-3.1954	0.00139636	0.00590896	Down
Mapk11	ENSMUSG00000053137	19094	216	235	246	410	438	520	356.538	1.38902	0.168482	8.24432	1.66099e-16	9.36138e-15	Up
Acr	ENSMUSG00000022622	11434	114	87	106	43	52	22	57.6053	-0.973299	0.336162	-2.89533	0.00378765	0.0138628	Down
Cpne8	ENSMUSG00000052560	66871	928	942	973	2991	2632	2361	1810.23	1.90547	0.128943	14.7776	2.04233e-49	2.07766e-46	Up
Kif21a	ENSMUSG00000022629	16564	473	447	472	555	618	580	531.012	0.749145	0.102231	7.32793	2.33731e-13	7.99244e-12	Up
Slc2a13	ENSMUSG00000036298	239606	635	395	493	71	116	73	233.013	-2.13176	0.334273	-6.37731	1.80231e-10	3.7304e-09	Down
Lrrk2	ENSMUSG00000036273	66725	462	416	471	446	483	634	577.897	0.63299	0.191423	3.30676	0.00094381	0.00423248	Up
Pus7l	ENSMUSG00000033356	78895	118	101	129	245	208	209	181.532	1.35334	0.1427	9.48384	2.45093e-21	2.58376e-19	Up
Slc38a2	ENSMUSG00000022462	67760	2286	2221	3352	2320	4151	2386	2811.43	0.594379	0.225896	2.6312	0.00850827	0.0275432	Up
Slc38a4	ENSMUSG00000022464	69354	17	15	21	4	3	3	32.6858	-1.97944	0.572432	-3.45794	0.000544329	0.00263	Down
Amigo2	ENSMUSG00000048218	105827	879	582	870	369	337	378	536.988	-0.669066	0.261343	-2.5601	0.0104641	0.0327409	Down
Vdr	ENSMUSG00000022479	22337	43	35	59	456	951	304	318.227	4.06137	0.35896	11.3143	1.11526e-29	2.6385e-27	Up
Tmem106c	ENSMUSG00000052369	380967	969	737	1139	410	549	414	666.478	-0.621678	0.135401	-4.59137	4.4034e-06	3.71287e-05	Down
Pfkm	ENSMUSG00000033065	18642	769	539	801	155	290	171	407.776	-1.35234	0.208929	-6.47274	9.62386e-11	2.08972e-09	Down
Zfp641	ENSMUSG00000022987	239652	317	268	266	114	127	112	179.249	-0.855191	0.168925	-5.06255	4.13687e-07	4.46756e-06	Down
Adcy6	ENSMUSG00000022994	11512	4927	3661	5005	1816	1970	1899	3127.02	-0.829407	0.115097	-7.20617	5.75473e-13	1.85556e-11	Down
Cacnb3	ENSMUSG00000003352	12297	332	269	540	172	202	137	281.357	-0.716264	0.27669	-2.58869	0.00963425	0.0305944	Down
Rnd1	ENSMUSG00000054855	223881	157	94	124	377	365	376	292.761	2.00482	0.259298	7.7317	1.06121e-14	4.44265e-13	Up
Fkbp11	ENSMUSG00000003355	66120	61	77	70	77	85	110	89.4509	0.797855	0.266807	2.99038	0.0027863	0.0107266	Up
Wnt10b	ENSMUSG00000022996	22410	14	23	30	2	3	0	16.0999	-3.32554	0.815908	-4.07587	4.58428e-05	0.000299909	Down
Ddn	ENSMUSG00000059213	13199	1	1	1	4	21	1	4.03874	3.50106	1.37002	2.55548	0.0106042	0.0331062	Up
Rhebl1	ENSMUSG00000023755	69159	94	65	89	34	38	18	48.2123	-1.03747	0.336203	-3.08585	0.00202973	0.00817923	Down
4930578M01Rik	ENSMUSG00000097587	75951	42	56	49	16	16	11	29.7737	-1.36538	0.355118	-3.84486	0.000120622	0.000704413	Down
Tuba1c	ENSMUSG00000043091	22146	444	455	400	1969	1710	1801	1430.94	2.48577	0.306388	8.11316	4.93191e-16	2.57294e-14	Up
Aqp2	ENSMUSG00000023013	11827	88	12	103	14	6	3	27.9205	-2.64656	0.880405	-3.00607	0.00264648	0.0102758	Down
Lima1	ENSMUSG00000023022	65970	2891	2513	3055	3210	3249	3178	3318.88	0.610865	0.124715	4.89808	9.67763e-07	9.5769e-06	Up
Larp4	ENSMUSG00000023025	207214	1513	1233	1462	1750	2405	1485	1585.42	0.838055	0.147897	5.66647	1.45769e-08	2.14759e-07	Up
Bin2	ENSMUSG00000098112	668218	124	145	124	232	145	217	209.888	1.0078	0.40314	2.49987	0.0124238	0.0378801	Up
Acvrl1	ENSMUSG00000000530	11482	1655	1801	1951	1919	4391	2226	2344.34	1.05932	0.253674	4.17591	2.968e-05	0.000204286	Up
Acvr1b	ENSMUSG00000000532	11479	961	1806	2159	5000	3707	4417	3316.79	1.8352	0.254801	7.20249	5.91239e-13	1.90338e-11	Up
Nr4a1	ENSMUSG00000023034	15370	369	279	333	874	228	369	449.559	1.02508	0.418723	2.44811	0.014361	0.0427613	Up
Atg101	ENSMUSG00000037204	68118	376	285	359	446	506	583	477.981	1.01432	0.132392	7.66145	1.83849e-14	7.36336e-13	Up
Smim41	ENSMUSG00000075408	77717	56	30	48	61	90	78	64.507	1.20252	0.348804	3.44754	0.000565706	0.00272165	Up
Krt79	ENSMUSG00000061397	223917	152	112	79	83	244	198	237.027	1.00723	0.344296	2.92547	0.00343934	0.0128069	Up
Soat2	ENSMUSG00000023045	223920	18	31	13	109	69	98	66.1365	2.54278	0.463084	5.49098	3.99712e-08	5.35388e-07	Up
Csad	ENSMUSG00000023044	246277	6135	4821	7399	2914	2727	2140	3463.56	-0.804009	0.192761	-4.17102	3.03234e-05	0.000208081	Down
Prr13	ENSMUSG00000023048	66151	1424	1414	1710	1815	1728	1752	1839.83	0.641888	0.133365	4.813	1.48678e-06	1.41158e-05	Up
Map3k12	ENSMUSG00000023050	26404	429	353	438	134	227	175	304.428	-0.768454	0.163785	-4.69186	2.70735e-06	2.40962e-05	Down
Npff	ENSMUSG00000023052	54615	93	80	110	46	53	38	67.1894	-0.621735	0.237798	-2.61455	0.0089344	0.0287126	Down
Calcoco1	ENSMUSG00000023055	67488	3179	2451	3358	1483	1585	1326	2073.04	-0.605096	0.111152	-5.44384	5.21439e-08	6.82263e-07	Down
Hoxc5	ENSMUSG00000022485	15424	599	636	742	150	167	130	364.41	-1.72767	0.190813	-9.05423	1.3753e-19	1.11928e-17	Down
Hoxc8	ENSMUSG00000001657	15426	3279	3350	4190	1778	1503	1278	2184.61	-0.822337	0.154048	-5.33818	9.38866e-08	1.15982e-06	Down
Hoxc6	ENSMUSG00000001661	15425	999	1176	1567	427	479	428	777.489	-1.06447	0.179206	-5.93989	2.85215e-09	4.81576e-08	Down
Hoxc4	ENSMUSG00000075394	15423	896	893	1129	329	351	296	560.146	-1.15782	0.175349	-6.60294	4.0308e-11	9.4157e-10	Down
Hnrnpa1	ENSMUSG00000046434	15382	4010	3850	4764	5525	4020	4539	4804.88	0.585491	0.138966	4.21318	2.51802e-05	0.000177369	Up
Nfe2	ENSMUSG00000058794	18022	19	23	34	40	37	45	33.7106	1.11377	0.445568	2.49966	0.0124313	0.0378916	Up
Zfp385a	ENSMUSG00000000552	29813	1480	1106	1613	582	716	514	1102.88	-0.784736	0.133935	-5.8591	4.65392e-09	7.55696e-08	Down
Itga5	ENSMUSG00000000555	16402	1620	1242	1393	3486	3191	5136	3422.43	1.89758	0.222583	8.52527	1.52455e-17	1.01368e-15	Up
Ppp1r1a	ENSMUSG00000022490	58200	2062	1397	1836	751	775	483	954.23	-0.972815	0.371009	-2.62208	0.00873959	0.028172	Down
Mucl1	ENSMUSG00000060311	20771	22	49	48	2	13	3	15.6744	-2.34093	0.753711	-3.10587	0.00189721	0.00770166	Down
Mefv	ENSMUSG00000022534	54483	19	18	25	176	84	174	113.734	3.24634	0.555516	5.84382	5.10181e-09	8.19916e-08	Up
Zfp174	ENSMUSG00000054939	385674	252	181	232	59	107	77	128.089	-1.03289	0.226032	-4.56968	4.88472e-06	4.07314e-05	Down
Slx4	ENSMUSG00000039738	52864	343	253	367	374	450	397	392.381	0.769288	0.110045	6.99068	2.73551e-12	7.98517e-11	Up
Vasn	ENSMUSG00000039646	246154	789	547	645	1106	604	1060	884.472	0.916458	0.227783	4.02339	5.73672e-05	0.000366006	Up
Cdip1	ENSMUSG00000004071	66626	3277	2082	3197	981	1173	927	1750.7	-1.04178	0.158138	-6.58776	4.46517e-11	1.03237e-09	Down
AU021092	ENSMUSG00000051669	239691	103	95	160	52	51	68	84.5271	-0.629274	0.248688	-2.53038	0.011394	0.0351833	Down
Eef2kmt	ENSMUSG00000022544	70511	419	349	470	550	526	570	504.389	0.838221	0.100726	8.32179	8.66483e-17	5.06594e-15	Up
Abat	ENSMUSG00000057880	268860	936	1305	1244	1063	1806	2219	1797.56	0.949085	0.266994	3.55471	0.000378403	0.00190994	Up
Emp2	ENSMUSG00000022505	13731	1105	903	1610	436	592	479	804.563	-0.827026	0.173326	-4.77151	1.82854e-06	1.7019e-05	Down
Ciita	ENSMUSG00000022504	12265	203	297	212	77	62	89	292.37	-1.24586	0.372932	-3.34073	0.000835597	0.00381214	Down
Dexi	ENSMUSG00000038055	58239	340	272	396	176	168	136	248.939	-0.641339	0.133324	-4.81039	1.50637e-06	1.42817e-05	Down
Socs1	ENSMUSG00000038037	12703	76	69	66	98	87	64	87.981	0.654233	0.241701	2.70679	0.00679373	0.0227794	Up
Litaf	ENSMUSG00000022500	56722	2084	2028	2217	4438	4184	4567	3661.07	1.47771	0.162376	9.10054	8.98843e-20	7.52586e-18	Up
Snn	ENSMUSG00000037972	20621	1395	1089	1469	1619	2507	1900	1513.71	1.02966	0.136572	7.53936	4.72272e-14	1.7927e-12	Up
Rsl1d1	ENSMUSG00000005846	66409	1385	1365	1847	1992	1630	1871	1737.35	0.687045	0.114639	5.99312	2.05857e-09	3.54947e-08	Up
Gspt1	ENSMUSG00000062203	14852	2210	2097	2466	3186	2388	3177	2800.16	0.795308	0.143255	5.5517	2.82912e-08	3.90776e-07	Up
Tnfrsf17	ENSMUSG00000022496	21935	9	11	9	0	1	3	5.41721	-2.45135	0.980767	-2.49942	0.0124395	0.0379111	Down
Shisa9	ENSMUSG00000022494	72555	36	29	38	1	1	6	18.5995	-3.25566	0.795537	-4.09241	4.26907e-05	0.000281734	Down
Mrtfb	ENSMUSG00000009569	239719	1417	925	1433	1247	1829	1409	1439.84	0.67765	0.145551	4.65577	3.22772e-06	2.81609e-05	Up
Myh11	ENSMUSG00000018830	17880	1828	2162	2807	474	1211	521	1261.12	-1.21686	0.333752	-3.646	0.000266353	0.00140374	Down
Snai2	ENSMUSG00000022676	20583	146	135	127	63	52	58	103.505	-0.822784	0.229295	-3.58833	0.000332808	0.00170519	Down
Cebpd	ENSMUSG00000071637	12609	910	876	770	1572	4422	1816	1656.64	1.99959	0.345037	5.7953	6.81984e-09	1.06622e-07	Up
Spidr	ENSMUSG00000041974	224008	318	314	339	312	487	312	345.002	0.603758	0.189515	3.1858	0.00144356	0.00608213	Up
Pkp2	ENSMUSG00000041957	67451	1818	1609	1293	1777	2296	1760	2004.88	0.705886	0.181848	3.88173	0.000103717	0.000616667	Up
Fgd4	ENSMUSG00000022788	224014	340	356	383	109	216	164	331.35	-0.734814	0.289638	-2.537	0.0111806	0.0345977	Down
Sdf2l1	ENSMUSG00000022769	64136	173	264	222	228	349	500	360.303	1.10774	0.338056	3.2768	0.00104992	0.00463879	Up
Ydjc	ENSMUSG00000041774	69101	19	21	13	41	39	40	36.6	1.59157	0.310005	5.13401	2.83637e-07	3.17605e-06	Up
Tmem191c	ENSMUSG00000055692	224019	102	76	106	28	31	44	57.3048	-1.03519	0.237506	-4.35858	1.30911e-05	9.88681e-05	Down
Snap29	ENSMUSG00000022765	67474	1259	1221	1342	1387	1563	1666	1447.18	0.689291	0.109233	6.31031	2.78471e-10	5.5949e-09	Up
Aifm3	ENSMUSG00000022763	72168	41	33	34	2	12	9	21.3027	-1.82506	0.601678	-3.03327	0.00241916	0.00950197	Down
Lrrc74b	ENSMUSG00000022759	74685	15	3	23	2	0	0	62.735	-3.88219	1.16419	-3.33468	0.000853983	0.00388619	Down
P2rx6	ENSMUSG00000022758	18440	230	106	208	29	33	28	99.4946	-2.15348	0.305101	-7.05827	1.68587e-12	5.08158e-11	Down
Slc7a4	ENSMUSG00000022756	224022	54	34	81	23	15	11	44.6833	-1.33681	0.362427	-3.6885	0.000225584	0.00121776	Down
Tssk1	ENSMUSG00000041566	22114	7	1	4	0	0	0	2.39601	-3.9893	1.62856	-2.44959	0.014302	0.0426356	Down
Prodh	ENSMUSG00000003526	19125	2872	1194	1445	562	735	339	831.336	-1.33108	0.316382	-4.20721	2.58544e-05	0.000181266	Down
Ranbp1	ENSMUSG00000005732	19385	1163	1136	1214	2039	1495	2131	1716.7	1.11097	0.182499	6.08755	1.14653e-09	2.06619e-08	Up
Tango2	ENSMUSG00000013539	27883	401	315	386	404	531	350	387.705	0.640358	0.147107	4.35301	1.3428e-05	0.000101075	Up
Comt	ENSMUSG00000000326	12846	5277	4986	4915	6590	6565	8036	7775	0.895451	0.16068	5.57289	2.50544e-08	3.51073e-07	Up
Iglc3	ENSMUSG00000105547	110787	50	45	9	3	1	0	12.3713	-4.32611	1.04215	-4.15116	3.30792e-05	0.000223761	Down
Iglc2	ENSMUSG00000076937	110786	42	232	45	3	9	7	43.9233	-3.76399	0.940375	-4.00265	6.2637e-05	0.000395044	Down
Iglv3	ENSMUSG00000076939	404743	2	22	16	0	0	0	3.79848	-5.80069	1.63448	-3.54895	0.000386764	0.00194731	Down
Klhl6	ENSMUSG00000043008	239743	126	122	174	43	92	53	114.852	-0.747542	0.30351	-2.46299	0.0137783	0.0413046	Down
Klhl24	ENSMUSG00000062901	75785	3593	3627	4425	1835	1785	1441	2552.73	-0.780983	0.123398	-6.32898	2.46792e-10	5.01121e-09	Down
Cyp2ab1	ENSMUSG00000022818	224044	63	72	82	10	13	14	49.5393	-2.13369	0.326335	-6.53834	6.22043e-11	1.40311e-09	Down
Abcc5	ENSMUSG00000022822	27416	3252	2607	2823	807	1431	969	1927.4	-1.02751	0.172326	-5.96257	2.48302e-09	4.22757e-08	Down
Ap2m1	ENSMUSG00000022841	11773	3062	2803	3315	3685	3391	4204	3811.75	0.72078	0.145327	4.95972	7.05947e-07	7.22132e-06	Up
Alg3	ENSMUSG00000033809	208624	333	255	272	525	410	503	446.677	1.16439	0.171937	6.77218	1.26858e-11	3.26303e-10	Up
Ece2	ENSMUSG00000022842	107522	77	79	80	174	166	225	159.096	1.6777	0.22907	7.32397	2.40735e-13	8.21811e-12	Up
Fam131a	ENSMUSG00000050821	78408	138	111	165	54	83	41	92.7235	-0.793413	0.235125	-3.37442	0.000739708	0.00342983	Down
Clcn2	ENSMUSG00000022843	12724	419	253	468	162	118	109	241.765	-1.10621	0.218767	-5.05656	4.26885e-07	4.59545e-06	Down
Chrd	ENSMUSG00000006958	12667	669	446	778	344	315	224	434.632	-0.660526	0.220765	-2.99199	0.00277164	0.0106782	Down
Ehhadh	ENSMUSG00000022853	74147	1854	2498	3165	916	651	456	1314.92	-1.46862	0.305152	-4.81276	1.48859e-06	1.41263e-05	Down
Etv5	ENSMUSG00000013089	104156	211	242	230	312	278	344	293.849	0.864263	0.229841	3.76026	0.000169739	0.00095007	Up
Dnajb11	ENSMUSG00000004460	67838	1385	1199	1469	1535	1540	1988	1678.18	0.74594	0.148831	5.012	5.38664e-07	5.66391e-06	Up
Ahsg	ENSMUSG00000022868	11625	10	19	12	31	19	43	28.2166	1.5812	0.652146	2.4246	0.0153251	0.045134	Up
Gm15746	ENSMUSG00000081988	100416761	7	4	4	0	1	0	2.49877	-3.38277	1.41321	-2.39368	0.0166802	0.0483397	Down
St6gal1	ENSMUSG00000022885	20440	578	716	555	195	419	269	522.689	-0.67892	0.26221	-2.58923	0.00961921	0.030556	Down
Il1rap	ENSMUSG00000022514	16180	212	172	225	286	259	322	273.441	0.938306	0.234381	4.00334	6.24542e-05	0.000394258	Up
Lrrc15	ENSMUSG00000052316	74488	32	22	30	3	4	4	13.208	-2.50598	0.705893	-3.55009	0.000385104	0.0019404	Down
Lsg1	ENSMUSG00000022538	224092	601	568	636	838	695	714	715.838	0.737421	0.110531	6.67165	2.52948e-11	6.12677e-10	Up
Fam43a	ENSMUSG00000046546	224093	1173	1275	1309	1233	2239	1521	1504.64	0.813907	0.185333	4.3916	1.12521e-05	8.62732e-05	Up
Pigz	ENSMUSG00000045625	239827	52	53	64	4	21	12	39.8329	-1.77811	0.374532	-4.74754	2.05909e-06	1.89224e-05	Down
Fbxo45	ENSMUSG00000035764	268882	2898	1808	2856	667	657	652	1175.73	-1.49954	0.1621	-9.2507	2.23031e-20	2.04054e-18	Down
Tnk2	ENSMUSG00000022791	51789	1417	1628	1995	748	545	819	1385.79	-0.827775	0.263672	-3.13941	0.0016929	0.00698314	Down
Lmln	ENSMUSG00000022802	239833	157	125	146	57	66	60	108.816	-0.804785	0.179923	-4.47294	7.71529e-06	6.15107e-05	Down
Muc13	ENSMUSG00000022824	17063	7	6	8	30	22	42	34.2617	2.59392	0.606347	4.27795	1.88621e-05	0.000137109	Up
Adcy5	ENSMUSG00000022840	224129	4245	6738	5720	7635	5486	7355	7032.43	0.698531	0.248282	2.81346	0.00490115	0.0172823	Up
Pdia5	ENSMUSG00000022844	72599	185	139	199	193	187	298	231.061	0.807876	0.2436	3.31641	0.00091182	0.00410804	Up
Hspbap1	ENSMUSG00000022849	66667	121	116	133	139	199	141	151.428	0.789057	0.162111	4.86737	1.13091e-06	1.10146e-05	Up
Kpna1	ENSMUSG00000022905	16646	1728	1602	1694	1993	1873	2169	1937.33	0.682624	0.0961422	7.10015	1.24626e-12	3.82448e-11	Up
Stfa2l1	ENSMUSG00000059657	268885	1	1	4	55	41	37	29.4592	4.91711	0.84854	5.79479	6.8405e-09	1.06813e-07	Up
Cstdc4	ENSMUSG00000079597	433016	0	0	0	28	27	43	23.135	7.89346	1.28976	6.1201	9.35177e-10	1.71261e-08	Up
Stfa3	ENSMUSG00000054905	20863	0	0	0	2	10	4	4.8472	5.26019	1.39028	3.78355	0.00015461	0.000874199	Up
Iqcb1	ENSMUSG00000022837	320299	296	312	390	163	146	85	199.341	-0.918953	0.217824	-4.21879	2.4562e-05	0.000173762	Down
Cd80	ENSMUSG00000075122	12519	38	37	36	76	70	76	67.7898	1.41705	0.30623	4.62741	3.70261e-06	3.17594e-05	Up
Tmem39a	ENSMUSG00000002845	67846	589	545	650	756	639	907	746.512	0.793215	0.149914	5.29112	1.21572e-07	1.46796e-06	Up
Zbtb20	ENSMUSG00000022708	56490	7895	6577	8208	2504	3143	2157	4493.11	-1.11972	0.15257	-7.33907	2.15082e-13	7.40449e-12	Down
Gramd1c	ENSMUSG00000036292	207798	54	44	68	23	25	18	36.9544	-0.901283	0.312455	-2.88452	0.00392012	0.0142835	Down
Naa50	ENSMUSG00000022698	72117	2777	2598	3028	3467	2481	3793	3355.3	0.639678	0.177944	3.59482	0.000324614	0.00166783	Up
Sidt1	ENSMUSG00000022696	320007	21	28	14	2	0	9	9.26655	-2.12241	0.814244	-2.6066	0.00914453	0.0293017	Down
Nepro	ENSMUSG00000036208	212547	265	233	305	394	383	399	350.273	0.975533	0.0973852	10.0173	1.28e-23	1.71335e-21	Up
[truncated: 2,664 more rows]

## Sheet: Table S4
Table S4 The CQCQD compounds and targets
Compounds	Targets
[truncated: 443 more rows]

## Sheet: Table S5
Table S5 The known-AP targets
[truncated: 1,452 more rows]
